# Supplementary material for: Human Milk Oligosaccharides in the Milk of Mothers Delivering Term versus Preterm Infants
Source: MDPI journal article supplement (doi:10.3390/nu11061282), 2019-06-05
Supplement: s1 [file s1]

**Table S3 Concentration of Human Milk Oligosaccharides in Term or Preterm Milk At Specified Postmenstrual Age**

*\* When there are results below the method limit of quantification (LoQ) the result has been assigned value of  $0.5 \times \text{LoQ}$ , hence the minimum value appears to be the same in many cases. When a large number of datapoints are below LoQ this can also have the effect that the median = minimum.*

| HMO  | Study Arm | Postmenstrual Age (weeks) | N  | HMO Concentration (mg/L) |       |       |       |          |                  |                  |
|------|-----------|---------------------------|----|--------------------------|-------|-------|-------|----------|------------------|------------------|
|      |           |                           |    | min *                    | max   | mean  | sd    | median * | Quartile 1 (25%) | Quartile 3 (75%) |
| 2'FL | PRE-TERM  | 29                        | 1  | 35.03                    | 35.03 | 35.03 | NA    | 35.03    | 35.03            | 35.03            |
| 2'FL | PRE-TERM  | 30                        | 10 | 21.88                    | 3958  | 2347  | 1643  | 3327     | 634.6            | 3462             |
| 2'FL | PRE-TERM  | 31                        | 12 | 6.500                    | 3798  | 1860  | 1284  | 2213     | 935.7            | 2438             |
| 2'FL | PRE-TERM  | 32                        | 17 | 6.500                    | 4196  | 1933  | 1375  | 1975     | 1070             | 2900             |
| 2'FL | PRE-TERM  | 33                        | 24 | 6.500                    | 5478  | 1890  | 1407  | 2194     | 819.7            | 2660             |
| 2'FL | PRE-TERM  | 34                        | 25 | 6.500                    | 3592  | 1627  | 1125  | 1705     | 832.5            | 2721             |
| 2'FL | PRE-TERM  | 35                        | 24 | 6.500                    | 3071  | 1515  | 1036  | 1643     | 626.4            | 2310             |
| 2'FL | PRE-TERM  | 36                        | 25 | 6.500                    | 3088  | 1573  | 1040  | 1819     | 788.8            | 2373             |
| 2'FL | PRE-TERM  | 37                        | 23 | 6.500                    | 3335  | 1585  | 1008  | 1735     | 1051             | 2264             |
| 2'FL | PRE-TERM  | 38                        | 15 | 6.500                    | 3006  | 1569  | 1190  | 1958     | 135.4            | 2650             |
| 2'FL | PRE-TERM  | 39                        | 20 | 6.500                    | 3151  | 1585  | 1012  | 1540     | 1195             | 2466             |
| 2'FL | PRE-TERM  | 40                        | 10 | 6.500                    | 3353  | 1466  | 1221  | 1576     | 252.0            | 2454             |
| 2'FL | PRE-TERM  | 41                        | 15 | 6.500                    | 3574  | 1713  | 1101  | 1895     | 1233             | 2293             |
| 2'FL | PRE-TERM  | 42                        | 9  | 6.500                    | 2926  | 1231  | 1129  | 1427     | 16.58            | 1552             |
| 2'FL | PRE-TERM  | 43                        | 13 | 6.500                    | 2847  | 1421  | 940.5 | 1464     | 1079             | 2077             |
| 2'FL | PRE-TERM  | 44                        | 8  | 6.500                    | 2687  | 1036  | 1035  | 961.5    | 13.04            | 1677             |
| 2'FL | PRE-TERM  | 45                        | 12 | 6.500                    | 2198  | 1208  | 862.5 | 1195     | 689.0            | 2042             |
| 2'FL | PRE-TERM  | 46                        | 8  | 6.500                    | 2946  | 1381  | 1120  | 1350     | 538.9            | 2158             |
| 2'FL | PRE-TERM  | 47                        | 3  | 956.7                    | 2203  | 1753  | 691.7 | 2099     | 1528             | 2151             |
| 2'FL | PRE-TERM  | 48                        | 5  | 6.500                    | 3455  | 1424  | 1303  | 1461     | 625.6            | 1569             |
| 2'FL | TERM      | 38                        | 2  | 3186                     | 4230  | 3708  | 738.3 | 3708     | 3447             | 3969             |
| 2'FL | TERM      | 39                        | 10 | 6.500                    | 5570  | 3463  | 1766  | 3171     | 2560             | 4969             |
| 2'FL | TERM      | 40                        | 19 | 6.500                    | 4305  | 2033  | 1530  | 2302     | 26.25            | 3260             |
| 2'FL | TERM      | 41                        | 27 | 6.500                    | 6076  | 2494  | 1601  | 2469     | 2027             | 3055             |
| 2'FL | TERM      | 42                        | 29 | 6.500                    | 5572  | 2043  | 1412  | 2043     | 1387             | 3065             |
| 2'FL | TERM      | 43                        | 28 | 6.500                    | 4390  | 2006  | 1311  | 2079     | 1509             | 2841             |
| 2'FL | TERM      | 44                        | 27 | 6.500                    | 4556  | 1845  | 1264  | 2043     | 1092             | 2935             |
| 2'FL | TERM      | 45                        | 28 | 6.500                    | 4090  | 1830  | 1281  | 1770     | 967.5            | 2994             |
| 2'FL | TERM      | 46                        | 24 | 6.500                    | 3666  | 1616  | 1200  | 1720     | 182.9            | 2581             |
| 2'FL | TERM      | 47                        | 18 | 6.500                    | 3530  | 1654  | 1269  | 1693     | 183.6            | 2885             |

**Table S3 Concentration of Human Milk Oligosaccharides in Term or Preterm Milk At Specified Postmenstrual Age**

*\* When there are results below the method limit of quantification (LoQ) the result has been assigned value of  $0.5 \times \text{LoQ}$ , hence the minimum value appears to be the same in many cases. When a large number of datapoints are below LoQ this can also have the effect that the median = minimum.*

| HMO  | Study Arm | Postmenstrual Age (weeks) | N  | HMO Concentration (mg/L) |       |       |        |          |                  |                  |
|------|-----------|---------------------------|----|--------------------------|-------|-------|--------|----------|------------------|------------------|
|      |           |                           |    | min *                    | max   | mean  | sd     | median * | Quartile 1 (25%) | Quartile 3 (75%) |
| 2'FL | TERM      | 48                        | 7  | 1399                     | 4133  | 2782  | 854.0  | 2868     | 2428             | 3110             |
| 3'GL | PRE-TERM  | 29                        | 1  | 11.32                    | 11.32 | 11.32 | NA     | 11.32    | 11.32            | 11.32            |
| 3'GL | PRE-TERM  | 30                        | 10 | 4.000                    | 10.44 | 5.944 | 2.587  | 4.000    | 4.000            | 8.174            |
| 3'GL | PRE-TERM  | 31                        | 12 | 4.000                    | 14.88 | 5.782 | 3.519  | 4.000    | 4.000            | 5.154            |
| 3'GL | PRE-TERM  | 32                        | 17 | 4.000                    | 28.16 | 7.583 | 6.324  | 4.000    | 4.000            | 10.38            |
| 3'GL | PRE-TERM  | 33                        | 24 | 4.000                    | 28.82 | 8.182 | 7.592  | 4.000    | 4.000            | 9.552            |
| 3'GL | PRE-TERM  | 34                        | 25 | 4.000                    | 30.06 | 7.369 | 6.804  | 4.000    | 4.000            | 9.744            |
| 3'GL | PRE-TERM  | 35                        | 24 | 4.000                    | 21.56 | 5.706 | 4.371  | 4.000    | 4.000            | 4.000            |
| 3'GL | PRE-TERM  | 36                        | 25 | 4.000                    | 10.04 | 4.775 | 1.846  | 4.000    | 4.000            | 4.000            |
| 3'GL | PRE-TERM  | 37                        | 23 | 4.000                    | 16.72 | 5.539 | 3.318  | 4.000    | 4.000            | 4.000            |
| 3'GL | PRE-TERM  | 38                        | 15 | 4.000                    | 70.00 | 11.52 | 17.05  | 4.000    | 4.000            | 10.99            |
| 3'GL | PRE-TERM  | 39                        | 20 | 4.000                    | 23.04 | 6.149 | 5.050  | 4.000    | 4.000            | 4.000            |
| 3'GL | PRE-TERM  | 40                        | 10 | 4.000                    | 21.24 | 8.792 | 6.732  | 4.000    | 4.000            | 12.78            |
| 3'GL | PRE-TERM  | 41                        | 15 | 4.000                    | 15.76 | 6.140 | 4.453  | 4.000    | 4.000            | 4.000            |
| 3'GL | PRE-TERM  | 42                        | 9  | 4.000                    | 21.49 | 8.540 | 6.193  | 4.000    | 4.000            | 11.78            |
| 3'GL | PRE-TERM  | 43                        | 13 | 4.000                    | 15.01 | 5.395 | 3.497  | 4.000    | 4.000            | 4.000            |
| 3'GL | PRE-TERM  | 44                        | 8  | 4.000                    | 10.64 | 5.441 | 2.708  | 4.000    | 4.000            | 5.222            |
| 3'GL | PRE-TERM  | 45                        | 12 | 4.000                    | 10.27 | 4.874 | 2.087  | 4.000    | 4.000            | 4.000            |
| 3'GL | PRE-TERM  | 46                        | 8  | 4.000                    | 15.21 | 7.858 | 4.511  | 6.523    | 4.000            | 10.63            |
| 3'GL | PRE-TERM  | 47                        | 3  | 4.000                    | 4.000 | 4.000 | 0.0000 | 4.000    | 4.000            | 4.000            |
| 3'GL | PRE-TERM  | 48                        | 5  | 4.000                    | 12.84 | 5.769 | 3.955  | 4.000    | 4.000            | 4.000            |
| 3'GL | TERM      | 38                        | 2  | 8.823                    | 9.726 | 9.274 | 0.6384 | 9.274    | 9.049            | 9.500            |
| 3'GL | TERM      | 39                        | 10 | 4.000                    | 19.87 | 10.76 | 5.880  | 9.735    | 5.105            | 15.77            |
| 3'GL | TERM      | 40                        | 19 | 4.000                    | 32.97 | 12.18 | 7.800  | 12.76    | 4.000            | 15.42            |
| 3'GL | TERM      | 41                        | 27 | 4.000                    | 19.72 | 8.324 | 4.870  | 8.173    | 4.000            | 11.70            |
| 3'GL | TERM      | 42                        | 29 | 4.000                    | 17.67 | 5.552 | 3.208  | 4.000    | 4.000            | 4.000            |
| 3'GL | TERM      | 43                        | 28 | 4.000                    | 16.81 | 5.967 | 3.465  | 4.000    | 4.000            | 8.365            |
| 3'GL | TERM      | 44                        | 27 | 4.000                    | 18.94 | 5.874 | 4.258  | 4.000    | 4.000            | 4.000            |
| 3'GL | TERM      | 45                        | 28 | 4.000                    | 33.42 | 5.596 | 5.872  | 4.000    | 4.000            | 4.000            |
| 3'GL | TERM      | 46                        | 24 | 4.000                    | 10.07 | 4.463 | 1.576  | 4.000    | 4.000            | 4.000            |

**Table S3 Concentration of Human Milk Oligosaccharides in Term or Preterm Milk At Specified Postmenstrual Age**

*\* When there are results below the method limit of quantification (LoQ) the result has been assigned value of  $0.5 \times \text{LoQ}$ , hence the minimum value appears to be the same in many cases. When a large number of datapoints are below LoQ this can also have the effect that the median = minimum.*

| HMO  | Study Arm | Postmenstrual Age (weeks) | N  | HMO Concentration (mg/L) |       |       |       |          |                  |                  |
|------|-----------|---------------------------|----|--------------------------|-------|-------|-------|----------|------------------|------------------|
|      |           |                           |    | min *                    | max   | mean  | sd    | median * | Quartile 1 (25%) | Quartile 3 (75%) |
| 3'GL | TERM      | 47                        | 18 | 4.000                    | 16.11 | 4.924 | 2.988 | 4.000    | 4.000            | 4.000            |
| 3'GL | TERM      | 48                        | 7  | 4.000                    | 20.73 | 6.391 | 6.325 | 4.000    | 4.000            | 4.000            |
| 3'SL | PRE-TERM  | 29                        | 1  | 419.1                    | 419.1 | 419.1 | NA    | 419.1    | 419.1            | 419.1            |
| 3'SL | PRE-TERM  | 30                        | 10 | 174.7                    | 365.6 | 230.5 | 55.48 | 221.0    | 196.3            | 247.8            |
| 3'SL | PRE-TERM  | 31                        | 12 | 126.6                    | 329.8 | 215.7 | 48.28 | 215.2    | 193.8            | 238.5            |
| 3'SL | PRE-TERM  | 32                        | 17 | 107.7                    | 272.6 | 203.5 | 48.64 | 209.5    | 184.5            | 241.6            |
| 3'SL | PRE-TERM  | 33                        | 24 | 113.1                    | 513.3 | 204.6 | 85.71 | 192.4    | 149.1            | 237.8            |
| 3'SL | PRE-TERM  | 34                        | 25 | 107.6                    | 439.9 | 199.1 | 77.81 | 173.1    | 151.4            | 234.3            |
| 3'SL | PRE-TERM  | 35                        | 24 | 98.75                    | 430.3 | 191.0 | 76.44 | 173.8    | 157.4            | 207.2            |
| 3'SL | PRE-TERM  | 36                        | 25 | 103.5                    | 362.9 | 176.6 | 61.49 | 168.9    | 129.5            | 199.7            |
| 3'SL | PRE-TERM  | 37                        | 23 | 85.96                    | 342.8 | 178.3 | 62.12 | 166.0    | 143.1            | 208.9            |
| 3'SL | PRE-TERM  | 38                        | 15 | 91.34                    | 438.1 | 185.1 | 92.53 | 169.3    | 108.7            | 229.4            |
| 3'SL | PRE-TERM  | 39                        | 20 | 91.08                    | 329.8 | 168.4 | 64.07 | 159.4    | 121.3            | 192.1            |
| 3'SL | PRE-TERM  | 40                        | 10 | 92.61                    | 333.8 | 174.9 | 81.31 | 147.5    | 119.8            | 208.4            |
| 3'SL | PRE-TERM  | 41                        | 15 | 99.07                    | 393.0 | 209.4 | 92.31 | 173.0    | 147.3            | 258.6            |
| 3'SL | PRE-TERM  | 42                        | 9  | 83.76                    | 274.9 | 148.7 | 65.02 | 146.8    | 93.94            | 162.9            |
| 3'SL | PRE-TERM  | 43                        | 13 | 109.4                    | 403.2 | 201.6 | 88.32 | 163.7    | 132.8            | 250.0            |
| 3'SL | PRE-TERM  | 44                        | 8  | 86.41                    | 248.9 | 147.8 | 57.48 | 131.8    | 108.3            | 164.8            |
| 3'SL | PRE-TERM  | 45                        | 12 | 86.95                    | 325.0 | 177.4 | 66.44 | 163.1    | 128.2            | 212.2            |
| 3'SL | PRE-TERM  | 46                        | 8  | 82.71                    | 282.3 | 162.9 | 71.35 | 153.3    | 114.6            | 185.1            |
| 3'SL | PRE-TERM  | 47                        | 3  | 116.2                    | 264.4 | 184.9 | 74.69 | 174.1    | 145.1            | 219.3            |
| 3'SL | PRE-TERM  | 48                        | 5  | 100.5                    | 319.4 | 163.5 | 88.68 | 130.3    | 121.3            | 145.9            |
| 3'SL | TERM      | 38                        | 2  | 181.9                    | 351.2 | 266.5 | 119.7 | 266.5    | 224.2            | 308.9            |
| 3'SL | TERM      | 39                        | 10 | 119.6                    | 287.2 | 213.4 | 65.63 | 220.1    | 150.4            | 276.3            |
| 3'SL | TERM      | 40                        | 19 | 94.16                    | 380.6 | 187.4 | 84.03 | 153.1    | 130.4            | 235.4            |
| 3'SL | TERM      | 41                        | 27 | 78.49                    | 270.7 | 149.2 | 47.01 | 139.2    | 119.7            | 173.0            |
| 3'SL | TERM      | 42                        | 29 | 86.80                    | 280.3 | 135.6 | 38.89 | 134.0    | 105.6            | 153.2            |
| 3'SL | TERM      | 43                        | 28 | 77.94                    | 282.3 | 132.9 | 40.79 | 126.9    | 105.2            | 154.2            |
| 3'SL | TERM      | 44                        | 27 | 72.18                    | 272.4 | 128.6 | 42.45 | 126.0    | 94.14            | 150.2            |
| 3'SL | TERM      | 45                        | 28 | 35.33                    | 274.9 | 128.9 | 44.43 | 125.5    | 105.5            | 152.0            |

**Table S3 Concentration of Human Milk Oligosaccharides in Term or Preterm Milk At Specified Postmenstrual Age**

*\* When there are results below the method limit of quantification (LoQ) the result has been assigned value of  $0.5 \times \text{LoQ}$ , hence the minimum value appears to be the same in many cases. When a large number of datapoints are below LoQ this can also have the effect that the median = minimum.*

| HMO  | Study Arm | Postmenstrual Age (weeks) | N  | HMO Concentration (mg/L) |       |       |       |          |                  |                  |
|------|-----------|---------------------------|----|--------------------------|-------|-------|-------|----------|------------------|------------------|
|      |           |                           |    | min *                    | max   | mean  | sd    | median * | Quartile 1 (25%) | Quartile 3 (75%) |
| 3'SL | TERM      | 46                        | 24 | 74.78                    | 303.0 | 125.4 | 45.56 | 112.4    | 102.0            | 136.7            |
| 3'SL | TERM      | 47                        | 18 | 50.25                    | 240.1 | 125.0 | 45.82 | 127.1    | 89.94            | 150.9            |
| 3'SL | TERM      | 48                        | 7  | 94.50                    | 236.8 | 144.4 | 47.99 | 140.2    | 113.8            | 155.7            |
| 3FL  | PRE-TERM  | 29                        | 1  | 1472                     | 1472  | 1472  | NA    | 1472     | 1472             | 1472             |
| 3FL  | PRE-TERM  | 30                        | 10 | 64.12                    | 1176  | 474.3 | 388.5 | 300.0    | 199.2            | 748.7            |
| 3FL  | PRE-TERM  | 31                        | 12 | 148.3                    | 1124  | 468.8 | 366.5 | 292.5    | 206.9            | 655.0            |
| 3FL  | PRE-TERM  | 32                        | 17 | 112.2                    | 1137  | 467.4 | 352.8 | 315.1    | 186.2            | 575.6            |
| 3FL  | PRE-TERM  | 33                        | 24 | 154.5                    | 1457  | 523.7 | 386.3 | 374.3    | 264.6            | 673.2            |
| 3FL  | PRE-TERM  | 34                        | 25 | 179.6                    | 1549  | 578.9 | 400.2 | 409.6    | 308.8            | 770.1            |
| 3FL  | PRE-TERM  | 35                        | 24 | 205.2                    | 1488  | 637.2 | 376.5 | 494.0    | 443.2            | 755.3            |
| 3FL  | PRE-TERM  | 36                        | 25 | 228.4                    | 1787  | 669.2 | 450.5 | 508.2    | 391.5            | 730.7            |
| 3FL  | PRE-TERM  | 37                        | 23 | 224.9                    | 2465  | 798.1 | 601.9 | 601.0    | 433.8            | 905.7            |
| 3FL  | PRE-TERM  | 38                        | 15 | 75.94                    | 1661  | 788.9 | 398.6 | 752.4    | 591.5            | 974.2            |
| 3FL  | PRE-TERM  | 39                        | 20 | 241.8                    | 1825  | 747.9 | 396.5 | 694.8    | 525.3            | 841.1            |
| 3FL  | PRE-TERM  | 40                        | 10 | 487.8                    | 2231  | 874.2 | 506.3 | 727.7    | 586.6            | 919.6            |
| 3FL  | PRE-TERM  | 41                        | 15 | 278.6                    | 2126  | 917.6 | 546.1 | 777.4    | 611.7            | 947.7            |
| 3FL  | PRE-TERM  | 42                        | 9  | 492.5                    | 2821  | 1057  | 705.9 | 899.8    | 638.4            | 1158             |
| 3FL  | PRE-TERM  | 43                        | 13 | 298.6                    | 3101  | 1128  | 911.1 | 790.3    | 579.4            | 1045             |
| 3FL  | PRE-TERM  | 44                        | 8  | 546.0                    | 2151  | 1111  | 497.1 | 1129     | 753.3            | 1223             |
| 3FL  | PRE-TERM  | 45                        | 12 | 325.1                    | 2188  | 1021  | 621.9 | 853.8    | 606.4            | 1195             |
| 3FL  | PRE-TERM  | 46                        | 8  | 486.6                    | 3398  | 1391  | 942.2 | 1185     | 831.9            | 1457             |
| 3FL  | PRE-TERM  | 47                        | 3  | 745.8                    | 1094  | 927.1 | 174.7 | 941.1    | 843.5            | 1018             |
| 3FL  | PRE-TERM  | 48                        | 5  | 688.4                    | 2505  | 1343  | 695.0 | 1133     | 1013             | 1378             |
| 3FL  | TERM      | 38                        | 2  | 260.1                    | 341.2 | 300.7 | 57.39 | 300.7    | 280.4            | 321.0            |
| 3FL  | TERM      | 39                        | 10 | 137.2                    | 1142  | 351.0 | 303.2 | 205.9    | 175.0            | 429.0            |
| 3FL  | TERM      | 40                        | 19 | 145.3                    | 1245  | 484.2 | 366.3 | 302.7    | 207.4            | 715.6            |
| 3FL  | TERM      | 41                        | 27 | 39.33                    | 1577  | 420.6 | 386.7 | 273.5    | 182.7            | 484.5            |
| 3FL  | TERM      | 42                        | 29 | 66.65                    | 1861  | 524.3 | 433.9 | 350.3    | 228.3            | 608.7            |
| 3FL  | TERM      | 43                        | 28 | 82.63                    | 1675  | 577.1 | 420.8 | 417.0    | 309.5            | 726.8            |
| 3FL  | TERM      | 44                        | 27 | 99.24                    | 1848  | 628.7 | 459.1 | 456.7    | 376.0            | 736.4            |

**Table S3 Concentration of Human Milk Oligosaccharides in Term or Preterm Milk At Specified Postmenstrual Age**

\* When there are results below the method limit of quantification (LoQ) the result has been assigned value of  $0.5 \times \text{LoQ}$ , hence the minimum value appears to be the same in many cases. When a large number of datapoints are below LoQ this can also have the effect that the median = minimum.

| HMO  | Study Arm | Postmenstrual Age (weeks) | N  | HMO Concentration (mg/L) |       |       |       |          |                  |                  |
|------|-----------|---------------------------|----|--------------------------|-------|-------|-------|----------|------------------|------------------|
|      |           |                           |    | min *                    | max   | mean  | sd    | median * | Quartile 1 (25%) | Quartile 3 (75%) |
| 3FL  | TERM      | 45                        | 28 | 95.34                    | 1983  | 664.0 | 434.1 | 531.8    | 429.7            | 685.8            |
| 3FL  | TERM      | 46                        | 24 | 102.9                    | 1978  | 742.7 | 506.4 | 551.3    | 445.3            | 975.5            |
| 3FL  | TERM      | 47                        | 18 | 118.2                    | 2013  | 712.5 | 500.8 | 545.8    | 448.1            | 913.2            |
| 3FL  | TERM      | 48                        | 7  | 131.6                    | 721.9 | 465.8 | 203.4 | 468.0    | 368.5            | 601.1            |
| 6'GL | PRE-TERM  | 29                        | 1  | 54.12                    | 54.12 | 54.12 | NA    | 54.12    | 54.12            | 54.12            |
| 6'GL | PRE-TERM  | 30                        | 10 | 29.26                    | 156.4 | 83.51 | 42.55 | 87.28    | 44.35            | 103.7            |
| 6'GL | PRE-TERM  | 31                        | 12 | 17.55                    | 109.6 | 53.08 | 27.16 | 47.65    | 36.18            | 74.65            |
| 6'GL | PRE-TERM  | 32                        | 17 | 16.66                    | 106.1 | 52.56 | 29.84 | 49.64    | 24.67            | 71.55            |
| 6'GL | PRE-TERM  | 33                        | 24 | 18.91                    | 137.9 | 50.01 | 29.30 | 42.29    | 28.06            | 61.93            |
| 6'GL | PRE-TERM  | 34                        | 25 | 16.16                    | 75.81 | 34.65 | 13.63 | 30.35    | 26.46            | 41.32            |
| 6'GL | PRE-TERM  | 35                        | 24 | 3.150                    | 55.98 | 28.62 | 11.66 | 26.15    | 23.45            | 33.86            |
| 6'GL | PRE-TERM  | 36                        | 25 | 11.33                    | 48.53 | 24.94 | 8.857 | 23.40    | 18.30            | 30.48            |
| 6'GL | PRE-TERM  | 37                        | 23 | 7.746                    | 43.71 | 24.69 | 9.233 | 23.56    | 19.17            | 30.21            |
| 6'GL | PRE-TERM  | 38                        | 15 | 12.88                    | 179.6 | 35.97 | 41.48 | 23.88    | 17.82            | 30.21            |
| 6'GL | PRE-TERM  | 39                        | 20 | 9.818                    | 33.74 | 17.97 | 6.454 | 16.45    | 13.99            | 20.02            |
| 6'GL | PRE-TERM  | 40                        | 10 | 12.86                    | 48.40 | 23.05 | 11.29 | 18.91    | 17.84            | 22.28            |
| 6'GL | PRE-TERM  | 41                        | 15 | 10.40                    | 35.95 | 20.74 | 8.054 | 17.89    | 14.30            | 25.90            |
| 6'GL | PRE-TERM  | 42                        | 9  | 9.255                    | 44.84 | 21.53 | 10.54 | 18.77    | 15.52            | 24.56            |
| 6'GL | PRE-TERM  | 43                        | 13 | 8.465                    | 32.86 | 19.07 | 6.895 | 16.48    | 14.18            | 22.66            |
| 6'GL | PRE-TERM  | 44                        | 8  | 6.997                    | 52.92 | 20.83 | 14.35 | 16.52    | 13.80            | 22.68            |
| 6'GL | PRE-TERM  | 45                        | 12 | 8.310                    | 28.68 | 16.06 | 6.662 | 12.31    | 11.15            | 20.65            |
| 6'GL | PRE-TERM  | 46                        | 8  | 8.740                    | 46.05 | 20.91 | 12.68 | 15.69    | 12.93            | 24.95            |
| 6'GL | PRE-TERM  | 47                        | 3  | 11.73                    | 21.16 | 15.14 | 5.229 | 12.52    | 12.12            | 16.84            |
| 6'GL | PRE-TERM  | 48                        | 5  | 3.150                    | 15.94 | 11.94 | 5.153 | 14.07    | 11.72            | 14.83            |
| 6'GL | TERM      | 38                        | 2  | 108.2                    | 128.5 | 118.3 | 14.31 | 118.3    | 113.3            | 123.4            |
| 6'GL | TERM      | 39                        | 10 | 38.11                    | 232.6 | 107.0 | 64.81 | 106.8    | 55.43            | 119.5            |
| 6'GL | TERM      | 40                        | 19 | 12.64                    | 234.0 | 102.2 | 60.96 | 94.87    | 59.89            | 135.5            |
| 6'GL | TERM      | 41                        | 27 | 8.541                    | 170.4 | 63.30 | 40.29 | 53.13    | 34.08            | 82.75            |
| 6'GL | TERM      | 42                        | 29 | 7.969                    | 69.86 | 37.13 | 15.17 | 36.24    | 28.52            | 50.18            |
| 6'GL | TERM      | 43                        | 28 | 3.150                    | 59.96 | 27.45 | 13.89 | 28.80    | 18.18            | 36.82            |

**Table S3 Concentration of Human Milk Oligosaccharides in Term or Preterm Milk At Specified Postmenstrual Age**

*\* When there are results below the method limit of quantification (LoQ) the result has been assigned value of  $0.5 \times \text{LoQ}$ , hence the minimum value appears to be the same in many cases. When a large number of datapoints are below LoQ this can also have the effect that the median = minimum.*

| HMO  | Study Arm | Postmenstrual Age (weeks) | N  | HMO Concentration (mg/L) |       |       |       |          |                  |                  |
|------|-----------|---------------------------|----|--------------------------|-------|-------|-------|----------|------------------|------------------|
|      |           |                           |    | min *                    | max   | mean  | sd    | median * | Quartile 1 (25%) | Quartile 3 (75%) |
| 6'GL | TERM      | 44                        | 27 | 3.150                    | 47.44 | 23.52 | 11.20 | 23.93    | 16.51            | 30.27            |
| 6'GL | TERM      | 45                        | 28 | 3.150                    | 68.27 | 20.69 | 13.32 | 18.92    | 12.87            | 26.07            |
| 6'GL | TERM      | 46                        | 24 | 3.150                    | 40.84 | 18.80 | 8.489 | 16.33    | 15.11            | 22.56            |
| 6'GL | TERM      | 47                        | 18 | 8.807                    | 47.47 | 18.28 | 8.932 | 14.95    | 14.05            | 20.64            |
| 6'GL | TERM      | 48                        | 7  | 9.963                    | 40.02 | 17.74 | 10.67 | 12.89    | 12.12            | 18.55            |
| 6'SL | PRE-TERM  | 29                        | 1  | 303.3                    | 303.3 | 303.3 | NA    | 303.3    | 303.3            | 303.3            |
| 6'SL | PRE-TERM  | 30                        | 10 | 145.3                    | 673.9 | 430.9 | 219.6 | 494.9    | 222.2            | 635.9            |
| 6'SL | PRE-TERM  | 31                        | 12 | 63.98                    | 879.6 | 509.3 | 273.5 | 590.5    | 289.3            | 667.4            |
| 6'SL | PRE-TERM  | 32                        | 17 | 61.39                    | 1132  | 509.2 | 285.8 | 598.5    | 263.9            | 659.3            |
| 6'SL | PRE-TERM  | 33                        | 24 | 53.89                    | 1135  | 471.9 | 263.5 | 477.3    | 327.3            | 576.6            |
| 6'SL | PRE-TERM  | 34                        | 25 | 74.89                    | 926.1 | 407.2 | 223.0 | 387.5    | 241.1            | 541.4            |
| 6'SL | PRE-TERM  | 35                        | 24 | 74.47                    | 695.8 | 370.6 | 164.5 | 401.3    | 257.2            | 491.4            |
| 6'SL | PRE-TERM  | 36                        | 25 | 55.02                    | 565.1 | 323.6 | 149.2 | 315.4    | 167.5            | 449.2            |
| 6'SL | PRE-TERM  | 37                        | 23 | 57.52                    | 476.6 | 276.0 | 113.7 | 294.3    | 183.9            | 365.6            |
| 6'SL | PRE-TERM  | 38                        | 15 | 10.00                    | 394.0 | 252.2 | 97.01 | 249.2    | 204.8            | 309.4            |
| 6'SL | PRE-TERM  | 39                        | 20 | 91.24                    | 383.8 | 199.2 | 78.82 | 184.4    | 147.9            | 231.5            |
| 6'SL | PRE-TERM  | 40                        | 10 | 135.1                    | 401.4 | 218.2 | 95.04 | 180.6    | 148.7            | 279.0            |
| 6'SL | PRE-TERM  | 41                        | 15 | 72.75                    | 199.9 | 147.1 | 37.92 | 154.2    | 129.1            | 171.7            |
| 6'SL | PRE-TERM  | 42                        | 9  | 100.6                    | 271.0 | 172.2 | 73.21 | 158.9    | 105.5            | 256.2            |
| 6'SL | PRE-TERM  | 43                        | 13 | 60.09                    | 185.6 | 112.0 | 38.36 | 101.1    | 88.74            | 129.4            |
| 6'SL | PRE-TERM  | 44                        | 8  | 65.69                    | 212.2 | 146.5 | 50.68 | 156.0    | 122.5            | 173.3            |
| 6'SL | PRE-TERM  | 45                        | 12 | 46.43                    | 176.7 | 92.85 | 40.21 | 84.59    | 59.48            | 113.7            |
| 6'SL | PRE-TERM  | 46                        | 8  | 61.11                    | 196.6 | 121.2 | 50.68 | 115.8    | 78.43            | 154.3            |
| 6'SL | PRE-TERM  | 47                        | 3  | 79.24                    | 109.6 | 95.55 | 15.29 | 97.87    | 88.55            | 103.7            |
| 6'SL | PRE-TERM  | 48                        | 5  | 48.01                    | 142.2 | 88.10 | 42.89 | 65.21    | 58.93            | 126.1            |
| 6'SL | TERM      | 38                        | 2  | 313.5                    | 442.1 | 377.8 | 90.97 | 377.8    | 345.7            | 410.0            |
| 6'SL | TERM      | 39                        | 10 | 222.0                    | 706.2 | 428.5 | 130.1 | 402.1    | 364.9            | 494.0            |
| 6'SL | TERM      | 40                        | 19 | 295.7                    | 1084  | 556.0 | 213.8 | 508.6    | 387.9            | 662.5            |
| 6'SL | TERM      | 41                        | 27 | 216.1                    | 985.4 | 594.9 | 210.8 | 552.4    | 439.9            | 780.7            |
| 6'SL | TERM      | 42                        | 29 | 198.9                    | 821.3 | 555.2 | 179.9 | 572.4    | 463.3            | 684.6            |

**Table S3 Concentration of Human Milk Oligosaccharides in Term or Preterm Milk At Specified Postmenstrual Age**

\* When there are results below the method limit of quantification (LoQ) the result has been assigned value of  $0.5 \times \text{LoQ}$ , hence the minimum value appears to be the same in many cases. When a large number of datapoints are below LoQ this can also have the effect that the median = minimum.

| HMO               | Study Arm | Postmenstrual Age (weeks) | N  | HMO Concentration (mg/L) |       |       |        |          |                  |                  |
|-------------------|-----------|---------------------------|----|--------------------------|-------|-------|--------|----------|------------------|------------------|
|                   |           |                           |    | min *                    | max   | mean  | sd     | median * | Quartile 1 (25%) | Quartile 3 (75%) |
| 6'SL              | TERM      | 43                        | 28 | 129.4                    | 792.3 | 469.6 | 176.4  | 486.7    | 341.0            | 573.2            |
| 6'SL              | TERM      | 44                        | 27 | 24.60                    | 574.6 | 353.5 | 149.3  | 387.3    | 255.9            | 435.7            |
| 6'SL              | TERM      | 45                        | 28 | 89.66                    | 700.9 | 302.8 | 142.6  | 321.2    | 185.4            | 360.9            |
| 6'SL              | TERM      | 46                        | 24 | 53.06                    | 662.3 | 263.5 | 130.4  | 241.1    | 199.3            | 322.4            |
| 6'SL              | TERM      | 47                        | 18 | 99.59                    | 671.2 | 252.5 | 135.0  | 209.9    | 170.5            | 285.1            |
| 6'SL              | TERM      | 48                        | 7  | 145.8                    | 301.0 | 204.9 | 52.97  | 192.3    | 176.3            | 221.2            |
| A-Tetrasaccharide | PRE-TERM  | 29                        | 1  | 7.500                    | 7.500 | 7.500 | NA     | 7.500    | 7.500            | 7.500            |
| A-Tetrasaccharide | PRE-TERM  | 30                        | 10 | 7.500                    | 166.6 | 26.86 | 50.27  | 7.500    | 7.500            | 7.500            |
| A-Tetrasaccharide | PRE-TERM  | 31                        | 12 | 7.500                    | 70.30 | 19.02 | 22.95  | 7.500    | 7.500            | 12.61            |
| A-Tetrasaccharide | PRE-TERM  | 32                        | 17 | 7.500                    | 315.1 | 47.39 | 83.02  | 7.500    | 7.500            | 54.83            |
| A-Tetrasaccharide | PRE-TERM  | 33                        | 24 | 7.500                    | 232.5 | 49.50 | 70.29  | 7.500    | 7.500            | 65.43            |
| A-Tetrasaccharide | PRE-TERM  | 34                        | 25 | 7.500                    | 250.0 | 33.91 | 61.74  | 7.500    | 7.500            | 19.00            |
| A-Tetrasaccharide | PRE-TERM  | 35                        | 24 | 7.500                    | 224.7 | 42.79 | 67.38  | 7.500    | 7.500            | 25.74            |
| A-Tetrasaccharide | PRE-TERM  | 36                        | 25 | 7.500                    | 226.0 | 41.18 | 66.59  | 7.500    | 7.500            | 27.62            |
| A-Tetrasaccharide | PRE-TERM  | 37                        | 23 | 7.500                    | 232.6 | 40.60 | 63.02  | 7.500    | 7.500            | 38.05            |
| A-Tetrasaccharide | PRE-TERM  | 38                        | 15 | 7.500                    | 266.6 | 60.21 | 89.13  | 7.500    | 7.500            | 70.09            |
| A-Tetrasaccharide | PRE-TERM  | 39                        | 20 | 7.500                    | 322.7 | 48.35 | 89.70  | 7.500    | 7.500            | 23.05            |
| A-Tetrasaccharide | PRE-TERM  | 40                        | 10 | 7.500                    | 113.0 | 29.44 | 42.36  | 7.500    | 7.500            | 19.50            |
| A-Tetrasaccharide | PRE-TERM  | 41                        | 15 | 7.500                    | 334.5 | 49.07 | 94.25  | 7.500    | 7.500            | 15.20            |
| A-Tetrasaccharide | PRE-TERM  | 42                        | 9  | 7.500                    | 101.9 | 29.85 | 40.38  | 7.500    | 7.500            | 22.64            |
| A-Tetrasaccharide | PRE-TERM  | 43                        | 13 | 7.500                    | 300.7 | 49.96 | 91.55  | 7.500    | 7.500            | 7.500            |
| A-Tetrasaccharide | PRE-TERM  | 44                        | 8  | 7.500                    | 86.79 | 19.30 | 27.78  | 7.500    | 7.500            | 11.28            |
| A-Tetrasaccharide | PRE-TERM  | 45                        | 12 | 7.500                    | 329.8 | 52.36 | 97.22  | 7.500    | 7.500            | 30.59            |
| A-Tetrasaccharide | PRE-TERM  | 46                        | 8  | 7.500                    | 132.3 | 37.58 | 50.15  | 7.500    | 7.500            | 47.51            |
| A-Tetrasaccharide | PRE-TERM  | 47                        | 3  | 7.500                    | 144.8 | 77.28 | 68.69  | 79.52    | 43.51            | 112.2            |
| A-Tetrasaccharide | PRE-TERM  | 48                        | 5  | 7.500                    | 102.4 | 32.23 | 41.17  | 7.500    | 7.500            | 36.19            |
| A-Tetrasaccharide | TERM      | 38                        | 2  | 7.500                    | 7.500 | 7.500 | 0.0000 | 7.500    | 7.500            | 7.500            |
| A-Tetrasaccharide | TERM      | 39                        | 10 | 7.500                    | 188.2 | 36.21 | 57.81  | 7.500    | 7.500            | 46.38            |
| A-Tetrasaccharide | TERM      | 40                        | 19 | 7.500                    | 154.4 | 30.39 | 40.33  | 7.500    | 7.500            | 40.12            |
| A-Tetrasaccharide | TERM      | 41                        | 27 | 7.500                    | 150.2 | 26.46 | 34.19  | 7.500    | 7.500            | 37.45            |

**Table S3 Concentration of Human Milk Oligosaccharides in Term or Preterm Milk At Specified Postmenstrual Age**

*\* When there are results below the method limit of quantification (LoQ) the result has been assigned value of  $0.5 \times \text{LoQ}$ , hence the minimum value appears to be the same in many cases. When a large number of datapoints are below LoQ this can also have the effect that the median = minimum.*

| HMO               | Study Arm | Postmenstrual Age (weeks) | N  | HMO Concentration (mg/L) |       |       |       |          |                  |                  |
|-------------------|-----------|---------------------------|----|--------------------------|-------|-------|-------|----------|------------------|------------------|
|                   |           |                           |    | min *                    | max   | mean  | sd    | median * | Quartile 1 (25%) | Quartile 3 (75%) |
| A-Tetrasaccharide | TERM      | 42                        | 29 | 7.500                    | 149.0 | 24.92 | 34.39 | 7.500    | 7.500            | 33.43            |
| A-Tetrasaccharide | TERM      | 43                        | 28 | 7.500                    | 153.9 | 26.56 | 34.47 | 7.500    | 7.500            | 33.52            |
| A-Tetrasaccharide | TERM      | 44                        | 27 | 7.500                    | 162.3 | 27.03 | 36.66 | 7.500    | 7.500            | 28.20            |
| A-Tetrasaccharide | TERM      | 45                        | 28 | 7.500                    | 138.9 | 23.50 | 33.48 | 7.500    | 7.500            | 25.12            |
| A-Tetrasaccharide | TERM      | 46                        | 24 | 7.500                    | 183.8 | 29.69 | 43.75 | 7.500    | 7.500            | 28.82            |
| A-Tetrasaccharide | TERM      | 47                        | 18 | 7.500                    | 165.4 | 29.38 | 45.03 | 7.500    | 7.500            | 22.23            |
| A-Tetrasaccharide | TERM      | 48                        | 7  | 7.500                    | 181.0 | 50.04 | 67.95 | 7.500    | 7.500            | 69.63            |
| DFLNHa            | PRE-TERM  | 29                        | 1  | 16.50                    | 16.50 | 16.50 | NA    | 16.50    | 16.50            | 16.50            |
| DFLNHa            | PRE-TERM  | 30                        | 10 | 16.50                    | 577.3 | 159.4 | 172.7 | 121.5    | 24.24            | 217.8            |
| DFLNHa            | PRE-TERM  | 31                        | 12 | 16.50                    | 495.2 | 212.9 | 185.3 | 184.5    | 16.50            | 389.3            |
| DFLNHa            | PRE-TERM  | 32                        | 17 | 16.50                    | 430.4 | 189.5 | 148.6 | 184.4    | 33.32            | 334.0            |
| DFLNHa            | PRE-TERM  | 33                        | 24 | 16.50                    | 583.6 | 184.5 | 153.7 | 180.9    | 16.50            | 297.9            |
| DFLNHa            | PRE-TERM  | 34                        | 25 | 16.50                    | 623.8 | 145.4 | 137.1 | 122.4    | 52.33            | 210.8            |
| DFLNHa            | PRE-TERM  | 35                        | 24 | 16.50                    | 542.4 | 125.1 | 113.1 | 141.3    | 16.50            | 165.8            |
| DFLNHa            | PRE-TERM  | 36                        | 25 | 16.50                    | 418.7 | 137.2 | 105.2 | 138.9    | 45.30            | 192.4            |
| DFLNHa            | PRE-TERM  | 37                        | 23 | 16.50                    | 351.9 | 111.5 | 86.69 | 101.2    | 40.79            | 152.7            |
| DFLNHa            | PRE-TERM  | 38                        | 15 | 16.50                    | 685.1 | 113.8 | 165.8 | 71.73    | 16.50            | 125.1            |
| DFLNHa            | PRE-TERM  | 39                        | 20 | 16.50                    | 249.7 | 71.43 | 59.80 | 63.68    | 16.50            | 97.26            |
| DFLNHa            | PRE-TERM  | 40                        | 10 | 16.50                    | 230.0 | 77.00 | 72.97 | 61.51    | 16.50            | 108.2            |
| DFLNHa            | PRE-TERM  | 41                        | 15 | 16.50                    | 179.2 | 47.95 | 42.05 | 36.86    | 16.50            | 60.39            |
| DFLNHa            | PRE-TERM  | 42                        | 9  | 16.50                    | 103.6 | 48.14 | 39.62 | 16.50    | 16.50            | 85.30            |
| DFLNHa            | PRE-TERM  | 43                        | 13 | 16.50                    | 83.70 | 43.28 | 21.41 | 47.27    | 16.50            | 51.95            |
| DFLNHa            | PRE-TERM  | 44                        | 8  | 16.50                    | 77.74 | 36.72 | 24.24 | 27.57    | 16.50            | 52.73            |
| DFLNHa            | PRE-TERM  | 45                        | 12 | 16.50                    | 139.6 | 37.86 | 36.24 | 16.50    | 16.50            | 45.64            |
| DFLNHa            | PRE-TERM  | 46                        | 8  | 16.50                    | 60.97 | 37.92 | 19.34 | 40.06    | 16.50            | 54.97            |
| DFLNHa            | PRE-TERM  | 47                        | 3  | 16.50                    | 52.20 | 35.51 | 17.96 | 37.84    | 27.17            | 45.02            |
| DFLNHa            | PRE-TERM  | 48                        | 5  | 16.50                    | 51.52 | 29.43 | 17.81 | 16.50    | 16.50            | 46.15            |
| DFLNHa            | TERM      | 38                        | 2  | 130.3                    | 159.2 | 144.7 | 20.46 | 144.7    | 137.5            | 152.0            |
| DFLNHa            | TERM      | 39                        | 10 | 16.50                    | 306.3 | 127.1 | 104.4 | 79.40    | 62.19            | 198.0            |
| DFLNHa            | TERM      | 40                        | 19 | 16.50                    | 399.0 | 130.9 | 108.2 | 131.6    | 16.50            | 178.7            |



**Table S3 Concentration of Human Milk Oligosaccharides in Term or Preterm Milk At Specified Postmenstrual Age**

*\* When there are results below the method limit of quantification (LoQ) the result has been assigned value of  $0.5 \times \text{LoQ}$ , hence the minimum value appears to be the same in many cases. When a large number of datapoints are below LoQ this can also have the effect that the median = minimum.*

| HMO    | Study Arm | Postmenstrual Age (weeks) | N  | HMO Concentration (mg/L) |       |       |       |          |                  |                  |
|--------|-----------|---------------------------|----|--------------------------|-------|-------|-------|----------|------------------|------------------|
|        |           |                           |    | min *                    | max   | mean  | sd    | median * | Quartile 1 (25%) | Quartile 3 (75%) |
| DFLNHa | TERM      | 41                        | 27 | 16.50                    | 488.4 | 194.6 | 125.3 | 181.4    | 103.9            | 259.1            |
| DFLNHa | TERM      | 42                        | 29 | 16.50                    | 664.0 | 215.1 | 177.2 | 196.2    | 79.80            | 300.9            |
| DFLNHa | TERM      | 43                        | 28 | 16.50                    | 759.1 | 199.7 | 180.7 | 162.2    | 67.58            | 322.2            |
| DFLNHa | TERM      | 44                        | 27 | 16.50                    | 709.4 | 170.6 | 169.5 | 125.2    | 35.25            | 269.3            |
| DFLNHa | TERM      | 45                        | 28 | 16.50                    | 747.0 | 145.7 | 160.8 | 114.5    | 16.50            | 227.8            |
| DFLNHa | TERM      | 46                        | 24 | 16.50                    | 563.0 | 114.4 | 126.3 | 77.45    | 16.50            | 163.5            |
| DFLNHa | TERM      | 47                        | 18 | 16.50                    | 525.5 | 123.0 | 133.2 | 101.2    | 16.50            | 137.8            |
| DFLNHa | TERM      | 48                        | 7  | 81.61                    | 463.1 | 182.7 | 137.8 | 121.4    | 101.3            | 205.0            |
| DSLNT  | PRE-TERM  | 29                        | 1  | 946.4                    | 946.4 | 946.4 | NA    | 946.4    | 946.4            | 946.4            |
| DSLNT  | PRE-TERM  | 30                        | 10 | 17.50                    | 843.2 | 355.5 | 208.3 | 333.9    | 263.9            | 392.5            |
| DSLNT  | PRE-TERM  | 31                        | 12 | 17.50                    | 786.4 | 398.7 | 209.6 | 419.4    | 386.4            | 488.7            |
| DSLNT  | PRE-TERM  | 32                        | 17 | 193.6                    | 719.0 | 412.4 | 142.1 | 430.8    | 295.4            | 511.9            |
| DSLNT  | PRE-TERM  | 33                        | 24 | 197.2                    | 843.4 | 443.6 | 179.7 | 389.3    | 303.4            | 588.7            |
| DSLNT  | PRE-TERM  | 34                        | 25 | 169.1                    | 822.5 | 427.0 | 184.2 | 398.1    | 258.9            | 559.2            |
| DSLNT  | PRE-TERM  | 35                        | 24 | 128.4                    | 908.0 | 419.8 | 216.2 | 364.8    | 265.3            | 536.9            |
| DSLNT  | PRE-TERM  | 36                        | 25 | 129.9                    | 796.0 | 345.5 | 182.8 | 291.5    | 213.2            | 426.4            |
| DSLNT  | PRE-TERM  | 37                        | 23 | 105.5                    | 725.2 | 305.0 | 155.8 | 282.1    | 182.9            | 381.7            |
| DSLNT  | PRE-TERM  | 38                        | 15 | 100.2                    | 628.2 | 286.8 | 150.4 | 289.8    | 175.4            | 374.0            |
| DSLNT  | PRE-TERM  | 39                        | 20 | 97.12                    | 597.5 | 263.9 | 146.3 | 214.3    | 174.3            | 316.9            |
| DSLNT  | PRE-TERM  | 40                        | 10 | 105.8                    | 530.6 | 314.5 | 141.2 | 292.2    | 227.9            | 423.5            |
| DSLNT  | PRE-TERM  | 41                        | 15 | 84.32                    | 452.7 | 218.9 | 104.1 | 191.0    | 164.9            | 255.5            |
| DSLNT  | PRE-TERM  | 42                        | 9  | 72.56                    | 422.5 | 238.5 | 111.5 | 256.2    | 158.8            | 328.2            |
| DSLNT  | PRE-TERM  | 43                        | 13 | 97.17                    | 435.1 | 208.0 | 92.41 | 169.3    | 148.8            | 241.7            |
| DSLNT  | PRE-TERM  | 44                        | 8  | 102.0                    | 318.0 | 203.0 | 78.25 | 216.4    | 132.4            | 249.2            |
| DSLNT  | PRE-TERM  | 45                        | 12 | 97.08                    | 459.9 | 190.6 | 96.20 | 165.0    | 136.4            | 212.0            |
| DSLNT  | PRE-TERM  | 46                        | 8  | 88.23                    | 311.8 | 204.4 | 76.04 | 209.0    | 162.4            | 254.4            |
| DSLNT  | PRE-TERM  | 47                        | 3  | 103.0                    | 158.2 | 133.9 | 28.20 | 140.5    | 121.8            | 149.4            |
| DSLNT  | PRE-TERM  | 48                        | 5  | 124.7                    | 219.3 | 183.0 | 37.51 | 184.3    | 174.5            | 212.0            |
| DSLNT  | TERM      | 38                        | 2  | 412.7                    | 433.7 | 423.2 | 14.79 | 423.2    | 418.0            | 428.4            |
| DSLNT  | TERM      | 39                        | 10 | 248.3                    | 489.2 | 359.2 | 79.12 | 353.3    | 308.5            | 401.1            |

**Table S3 Concentration of Human Milk Oligosaccharides in Term or Preterm Milk At Specified Postmenstrual Age**

*\* When there are results below the method limit of quantification (LoQ) the result has been assigned value of  $0.5 \times \text{LoQ}$ , hence the minimum value appears to be the same in many cases. When a large number of datapoints are below LoQ this can also have the effect that the median = minimum.*

| HMO   | Study Arm | Postmenstrual Age (weeks) | N  | HMO Concentration (mg/L) |       |       |       |          |                  |                  |
|-------|-----------|---------------------------|----|--------------------------|-------|-------|-------|----------|------------------|------------------|
|       |           |                           |    | min *                    | max   | mean  | sd    | median * | Quartile 1 (25%) | Quartile 3 (75%) |
| DSLNT | TERM      | 40                        | 19 | 146.3                    | 697.9 | 389.5 | 149.4 | 348.3    | 277.4            | 475.5            |
| DSLNT | TERM      | 41                        | 27 | 135.3                    | 880.1 | 367.0 | 145.9 | 357.8    | 279.9            | 403.8            |
| DSLNT | TERM      | 42                        | 29 | 17.50                    | 836.5 | 332.2 | 152.6 | 309.1    | 249.9            | 406.8            |
| DSLNT | TERM      | 43                        | 28 | 105.1                    | 630.2 | 293.9 | 116.1 | 286.9    | 222.1            | 336.6            |
| DSLNT | TERM      | 44                        | 27 | 90.80                    | 555.7 | 247.5 | 105.2 | 225.4    | 166.7            | 317.5            |
| DSLNT | TERM      | 45                        | 28 | 48.35                    | 426.1 | 221.4 | 95.81 | 196.5    | 159.7            | 295.5            |
| DSLNT | TERM      | 46                        | 24 | 69.19                    | 437.5 | 194.0 | 90.51 | 172.4    | 125.9            | 247.8            |
| DSLNT | TERM      | 47                        | 18 | 48.04                    | 422.7 | 185.0 | 93.01 | 177.2    | 118.8            | 250.6            |
| DSLNT | TERM      | 48                        | 7  | 60.14                    | 223.1 | 148.2 | 63.00 | 140.2    | 103.6            | 203.2            |
| LDFT  | PRE-TERM  | 29                        | 1  | 22.50                    | 22.50 | 22.50 | NA    | 22.50    | 22.50            | 22.50            |
| LDFT  | PRE-TERM  | 30                        | 10 | 22.50                    | 546.1 | 258.0 | 230.9 | 200.6    | 31.04            | 506.4            |
| LDFT  | PRE-TERM  | 31                        | 12 | 22.50                    | 759.0 | 234.4 | 230.8 | 159.1    | 58.08            | 307.6            |
| LDFT  | PRE-TERM  | 32                        | 17 | 22.50                    | 1243  | 259.7 | 307.2 | 148.2    | 89.90            | 310.7            |
| LDFT  | PRE-TERM  | 33                        | 24 | 22.50                    | 864.6 | 236.6 | 242.9 | 168.2    | 52.94            | 253.9            |
| LDFT  | PRE-TERM  | 34                        | 25 | 22.50                    | 2513  | 299.3 | 518.2 | 131.8    | 90.33            | 262.6            |
| LDFT  | PRE-TERM  | 35                        | 24 | 22.50                    | 1926  | 284.1 | 388.4 | 204.4    | 76.99            | 302.9            |
| LDFT  | PRE-TERM  | 36                        | 25 | 22.50                    | 604.5 | 182.6 | 148.8 | 163.8    | 70.57            | 248.0            |
| LDFT  | PRE-TERM  | 37                        | 23 | 22.50                    | 910.9 | 231.3 | 204.2 | 178.0    | 74.68            | 331.7            |
| LDFT  | PRE-TERM  | 38                        | 15 | 22.50                    | 2333  | 453.2 | 589.8 | 292.4    | 99.55            | 469.1            |
| LDFT  | PRE-TERM  | 39                        | 20 | 22.50                    | 813.5 | 266.7 | 243.3 | 203.6    | 102.8            | 339.9            |
| LDFT  | PRE-TERM  | 40                        | 10 | 22.50                    | 2758  | 466.0 | 825.2 | 206.8    | 47.81            | 384.0            |
| LDFT  | PRE-TERM  | 41                        | 15 | 22.50                    | 3003  | 725.4 | 901.8 | 430.0    | 115.2            | 837.2            |
| LDFT  | PRE-TERM  | 42                        | 9  | 22.50                    | 677.0 | 210.4 | 207.9 | 210.5    | 22.50            | 231.9            |
| LDFT  | PRE-TERM  | 43                        | 13 | 22.50                    | 1827  | 464.0 | 618.7 | 251.7    | 91.69            | 394.0            |
| LDFT  | PRE-TERM  | 44                        | 8  | 22.50                    | 574.3 | 216.6 | 208.7 | 169.1    | 22.50            | 371.3            |
| LDFT  | PRE-TERM  | 45                        | 12 | 22.50                    | 1825  | 430.6 | 552.1 | 279.6    | 83.40            | 407.5            |
| LDFT  | PRE-TERM  | 46                        | 8  | 22.50                    | 791.9 | 288.6 | 243.8 | 266.8    | 179.3            | 321.4            |
| LDFT  | PRE-TERM  | 47                        | 3  | 142.6                    | 499.2 | 327.3 | 178.6 | 340.0    | 241.3            | 419.6            |
| LDFT  | PRE-TERM  | 48                        | 5  | 22.50                    | 516.9 | 284.5 | 204.4 | 284.9    | 150.8            | 447.7            |
| LDFT  | TERM      | 38                        | 2  | 390.4                    | 617.8 | 504.1 | 160.8 | 504.1    | 447.3            | 561.0            |

**Table S3 Concentration of Human Milk Oligosaccharides in Term or Preterm Milk At Specified Postmenstrual Age**

*\* When there are results below the method limit of quantification (LoQ) the result has been assigned value of  $0.5 \times \text{LoQ}$ , hence the minimum value appears to be the same in many cases. When a large number of datapoints are below LoQ this can also have the effect that the median = minimum.*

| HMO     | Study Arm | Postmenstrual Age (weeks) | N  | HMO Concentration (mg/L) |       |       |       |          |                  |                  |
|---------|-----------|---------------------------|----|--------------------------|-------|-------|-------|----------|------------------|------------------|
|         |           |                           |    | min *                    | max   | mean  | sd    | median * | Quartile 1 (25%) | Quartile 3 (75%) |
| LDFT    | TERM      | 39                        | 10 | 22.50                    | 983.9 | 491.3 | 325.2 | 473.2    | 271.8            | 743.3            |
| LDFT    | TERM      | 40                        | 19 | 22.50                    | 810.2 | 299.3 | 263.6 | 325.0    | 22.50            | 456.9            |
| LDFT    | TERM      | 41                        | 27 | 22.50                    | 965.0 | 247.5 | 196.9 | 235.2    | 100.4            | 335.1            |
| LDFT    | TERM      | 42                        | 29 | 22.50                    | 549.3 | 198.1 | 133.4 | 222.2    | 109.1            | 281.0            |
| LDFT    | TERM      | 43                        | 28 | 22.50                    | 1270  | 250.4 | 272.1 | 193.3    | 133.0            | 296.4            |
| LDFT    | TERM      | 44                        | 27 | 22.50                    | 2907  | 286.4 | 536.7 | 196.4    | 112.6            | 297.8            |
| LDFT    | TERM      | 45                        | 28 | 22.50                    | 1713  | 278.5 | 349.8 | 222.5    | 110.0            | 301.5            |
| LDFT    | TERM      | 46                        | 24 | 22.50                    | 566.9 | 219.9 | 159.6 | 216.7    | 89.24            | 336.0            |
| LDFT    | TERM      | 47                        | 18 | 22.50                    | 429.7 | 198.2 | 148.5 | 214.3    | 34.11            | 324.2            |
| LDFT    | TERM      | 48                        | 7  | 143.8                    | 818.6 | 383.8 | 235.2 | 334.0    | 228.2            | 466.9            |
| LNDFH-I | PRE-TERM  | 29                        | 1  | 115.7                    | 115.7 | 115.7 | NA    | 115.7    | 115.7            | 115.7            |
| LNDFH-I | PRE-TERM  | 30                        | 10 | 5.000                    | 1679  | 741.0 | 647.0 | 963.9    | 69.83            | 1076             |
| LNDFH-I | PRE-TERM  | 31                        | 12 | 5.000                    | 1761  | 779.0 | 630.1 | 816.6    | 70.81            | 1232             |
| LNDFH-I | PRE-TERM  | 32                        | 17 | 5.000                    | 1781  | 851.4 | 649.8 | 960.8    | 49.54            | 1468             |
| LNDFH-I | PRE-TERM  | 33                        | 24 | 5.000                    | 1860  | 876.0 | 647.8 | 994.8    | 36.57            | 1336             |
| LNDFH-I | PRE-TERM  | 34                        | 25 | 5.000                    | 3123  | 911.0 | 758.7 | 1004     | 41.75            | 1373             |
| LNDFH-I | PRE-TERM  | 35                        | 24 | 5.000                    | 2269  | 870.6 | 646.6 | 975.8    | 35.02            | 1287             |
| LNDFH-I | PRE-TERM  | 36                        | 25 | 5.000                    | 1707  | 782.9 | 564.8 | 905.6    | 36.61            | 1157             |
| LNDFH-I | PRE-TERM  | 37                        | 23 | 5.000                    | 1585  | 776.9 | 526.2 | 939.9    | 302.3            | 1167             |
| LNDFH-I | PRE-TERM  | 38                        | 15 | 5.000                    | 1910  | 808.8 | 620.2 | 832.1    | 289.7            | 1272             |
| LNDFH-I | PRE-TERM  | 39                        | 20 | 5.000                    | 1661  | 783.2 | 519.0 | 918.0    | 510.7            | 1088             |
| LNDFH-I | PRE-TERM  | 40                        | 10 | 5.000                    | 1575  | 801.0 | 616.5 | 839.2    | 199.5            | 1221             |
| LNDFH-I | PRE-TERM  | 41                        | 15 | 5.000                    | 1551  | 827.6 | 561.0 | 910.9    | 385.0            | 1261             |
| LNDFH-I | PRE-TERM  | 42                        | 9  | 5.000                    | 1606  | 668.2 | 584.3 | 613.2    | 14.03            | 1090             |
| LNDFH-I | PRE-TERM  | 43                        | 13 | 5.000                    | 1768  | 804.6 | 645.3 | 775.3    | 33.59            | 1147             |
| LNDFH-I | PRE-TERM  | 44                        | 8  | 5.000                    | 1182  | 577.2 | 498.1 | 741.2    | 10.20            | 924.3            |
| LNDFH-I | PRE-TERM  | 45                        | 12 | 5.000                    | 1249  | 600.3 | 469.5 | 707.0    | 26.86            | 980.0            |
| LNDFH-I | PRE-TERM  | 46                        | 8  | 5.000                    | 1431  | 687.7 | 501.0 | 737.0    | 432.2            | 946.5            |
| LNDFH-I | PRE-TERM  | 47                        | 3  | 578.1                    | 1327  | 833.6 | 427.2 | 595.8    | 587.0            | 961.3            |
| LNDFH-I | PRE-TERM  | 48                        | 5  | 5.000                    | 967.5 | 555.8 | 350.0 | 600.4    | 530.1            | 676.3            |

**Table S3 Concentration of Human Milk Oligosaccharides in Term or Preterm Milk At Specified Postmenstrual Age**

*\* When there are results below the method limit of quantification (LoQ) the result has been assigned value of  $0.5 \times \text{LoQ}$ , hence the minimum value appears to be the same in many cases. When a large number of datapoints are below LoQ this can also have the effect that the median = minimum.*

| HMO     | Study Arm | Postmenstrual Age (weeks) | N  | HMO Concentration (mg/L) |       |       |       |          |                  |                  |
|---------|-----------|---------------------------|----|--------------------------|-------|-------|-------|----------|------------------|------------------|
|         |           |                           |    | min *                    | max   | mean  | sd    | median * | Quartile 1 (25%) | Quartile 3 (75%) |
| LNDFH-I | TERM      | 38                        | 2  | 1301                     | 1689  | 1495  | 274.3 | 1495     | 1398             | 1592             |
| LNDFH-I | TERM      | 39                        | 10 | 5.000                    | 1755  | 1106  | 506.9 | 1101     | 871.5            | 1417             |
| LNDFH-I | TERM      | 40                        | 19 | 5.000                    | 2122  | 981.7 | 764.9 | 1015     | 5.000            | 1578             |
| LNDFH-I | TERM      | 41                        | 27 | 5.000                    | 2264  | 1024  | 653.6 | 1093     | 853.8            | 1420             |
| LNDFH-I | TERM      | 42                        | 29 | 5.000                    | 2313  | 948.8 | 684.0 | 1069     | 5.000            | 1334             |
| LNDFH-I | TERM      | 43                        | 28 | 5.000                    | 1937  | 897.2 | 612.1 | 982.8    | 523.4            | 1293             |
| LNDFH-I | TERM      | 44                        | 27 | 5.000                    | 1983  | 813.5 | 611.2 | 804.7    | 238.0            | 1175             |
| LNDFH-I | TERM      | 45                        | 28 | 5.000                    | 2024  | 788.6 | 565.8 | 825.6    | 412.5            | 1171             |
| LNDFH-I | TERM      | 46                        | 24 | 5.000                    | 2167  | 711.1 | 598.5 | 681.2    | 5.000            | 1024             |
| LNDFH-I | TERM      | 47                        | 18 | 5.000                    | 1935  | 640.9 | 661.4 | 440.0    | 5.000            | 1174             |
| LNDFH-I | TERM      | 48                        | 7  | 5.000                    | 1304  | 757.7 | 464.7 | 849.3    | 464.5            | 1108             |
| LNFP-I  | PRE-TERM  | 29                        | 1  | 13.50                    | 13.50 | 13.50 | NA    | 13.50    | 13.50            | 13.50            |
| LNFP-I  | PRE-TERM  | 30                        | 10 | 13.50                    | 2639  | 1254  | 969.2 | 1686     | 203.5            | 1909             |
| LNFP-I  | PRE-TERM  | 31                        | 12 | 13.50                    | 2630  | 1176  | 902.1 | 1220     | 494.2            | 1669             |
| LNFP-I  | PRE-TERM  | 32                        | 17 | 13.50                    | 2806  | 1118  | 825.5 | 1197     | 723.1            | 1448             |
| LNFP-I  | PRE-TERM  | 33                        | 24 | 13.50                    | 2062  | 968.0 | 665.5 | 1058     | 579.8            | 1429             |
| LNFP-I  | PRE-TERM  | 34                        | 25 | 13.50                    | 1634  | 830.4 | 563.7 | 917.9    | 578.9            | 1351             |
| LNFP-I  | PRE-TERM  | 35                        | 24 | 13.50                    | 1840  | 734.9 | 519.2 | 725.3    | 439.5            | 993.7            |
| LNFP-I  | PRE-TERM  | 36                        | 25 | 13.50                    | 1773  | 693.8 | 506.4 | 660.3    | 558.8            | 949.2            |
| LNFP-I  | PRE-TERM  | 37                        | 23 | 13.50                    | 1188  | 604.7 | 399.6 | 628.0    | 401.9            | 952.1            |
| LNFP-I  | PRE-TERM  | 38                        | 15 | 13.50                    | 1126  | 459.2 | 374.5 | 393.9    | 157.7            | 617.6            |
| LNFP-I  | PRE-TERM  | 39                        | 20 | 13.50                    | 1436  | 537.3 | 373.8 | 508.7    | 370.2            | 759.1            |
| LNFP-I  | PRE-TERM  | 40                        | 10 | 13.50                    | 1075  | 451.4 | 379.4 | 429.0    | 97.57            | 753.4            |
| LNFP-I  | PRE-TERM  | 41                        | 15 | 13.50                    | 829.3 | 438.8 | 291.5 | 494.9    | 222.1            | 659.3            |
| LNFP-I  | PRE-TERM  | 42                        | 9  | 13.50                    | 966.6 | 365.5 | 339.1 | 301.7    | 13.50            | 649.5            |
| LNFP-I  | PRE-TERM  | 43                        | 13 | 13.50                    | 1014  | 486.6 | 352.6 | 417.3    | 251.8            | 812.1            |
| LNFP-I  | PRE-TERM  | 44                        | 8  | 13.50                    | 549.4 | 266.0 | 224.5 | 327.9    | 13.50            | 423.1            |
| LNFP-I  | PRE-TERM  | 45                        | 12 | 13.50                    | 933.6 | 357.3 | 326.4 | 264.0    | 114.8            | 636.2            |
| LNFP-I  | PRE-TERM  | 46                        | 8  | 13.50                    | 717.8 | 304.0 | 246.1 | 324.6    | 102.0            | 442.0            |
| LNFP-I  | PRE-TERM  | 47                        | 3  | 195.2                    | 635.0 | 376.5 | 229.8 | 299.3    | 247.3            | 467.2            |

**Table S3 Concentration of Human Milk Oligosaccharides in Term or Preterm Milk At Specified Postmenstrual Age**

*\* When there are results below the method limit of quantification (LoQ) the result has been assigned value of  $0.5 \times \text{LoQ}$ , hence the minimum value appears to be the same in many cases. When a large number of datapoints are below LoQ this can also have the effect that the median = minimum.*

| HMO     | Study Arm | Postmenstrual Age (weeks) | N  | HMO Concentration (mg/L) |       |       |       |          |                  |                  |
|---------|-----------|---------------------------|----|--------------------------|-------|-------|-------|----------|------------------|------------------|
|         |           |                           |    | min *                    | max   | mean  | sd    | median * | Quartile 1 (25%) | Quartile 3 (75%) |
| LNFP-I  | PRE-TERM  | 48                        | 5  | 13.50                    | 377.1 | 194.7 | 137.6 | 167.3    | 142.5            | 273.0            |
| LNFP-I  | TERM      | 38                        | 2  | 1760                     | 1768  | 1764  | 6.024 | 1764     | 1762             | 1766             |
| LNFP-I  | TERM      | 39                        | 10 | 13.50                    | 2547  | 1518  | 868.9 | 1530     | 986.7            | 2270             |
| LNFP-I  | TERM      | 40                        | 19 | 13.50                    | 3381  | 1253  | 1103  | 1228     | 13.50            | 1998             |
| LNFP-I  | TERM      | 41                        | 27 | 13.50                    | 3597  | 1576  | 1058  | 1613     | 917.8            | 2292             |
| LNFP-I  | TERM      | 42                        | 29 | 13.50                    | 3156  | 1194  | 895.3 | 1264     | 418.7            | 1723             |
| LNFP-I  | TERM      | 43                        | 28 | 13.50                    | 2655  | 1000  | 796.7 | 882.0    | 461.8            | 1284             |
| LNFP-I  | TERM      | 44                        | 27 | 13.50                    | 2647  | 819.8 | 707.1 | 735.2    | 272.0            | 1226             |
| LNFP-I  | TERM      | 45                        | 28 | 13.50                    | 1899  | 687.6 | 544.1 | 696.7    | 291.8            | 937.8            |
| LNFP-I  | TERM      | 46                        | 24 | 13.50                    | 1956  | 582.3 | 525.3 | 489.0    | 147.3            | 788.7            |
| LNFP-I  | TERM      | 47                        | 18 | 13.50                    | 2617  | 644.3 | 646.1 | 700.4    | 52.33            | 836.7            |
| LNFP-I  | TERM      | 48                        | 7  | 192.3                    | 1715  | 851.2 | 509.9 | 750.0    | 525.2            | 1125             |
| LNFP-II | PRE-TERM  | 29                        | 1  | 2094                     | 2094  | 2094  | NA    | 2094     | 2094             | 2094             |
| LNFP-II | PRE-TERM  | 30                        | 10 | 17.50                    | 1740  | 553.6 | 609.0 | 269.7    | 125.2            | 935.4            |
| LNFP-II | PRE-TERM  | 31                        | 12 | 17.50                    | 1628  | 556.6 | 547.1 | 307.0    | 213.7            | 649.2            |
| LNFP-II | PRE-TERM  | 32                        | 17 | 17.50                    | 1775  | 513.3 | 500.4 | 327.7    | 164.5            | 678.9            |
| LNFP-II | PRE-TERM  | 33                        | 24 | 17.50                    | 1845  | 576.3 | 547.8 | 341.6    | 193.5            | 683.5            |
| LNFP-II | PRE-TERM  | 34                        | 25 | 17.50                    | 1950  | 596.8 | 532.1 | 417.8    | 193.2            | 791.2            |
| LNFP-II | PRE-TERM  | 35                        | 24 | 17.50                    | 2138  | 623.8 | 564.5 | 406.9    | 264.7            | 783.7            |
| LNFP-II | PRE-TERM  | 36                        | 25 | 17.50                    | 2220  | 622.4 | 584.2 | 483.2    | 222.8            | 779.9            |
| LNFP-II | PRE-TERM  | 37                        | 23 | 17.50                    | 1804  | 577.0 | 495.6 | 452.5    | 240.0            | 742.9            |
| LNFP-II | PRE-TERM  | 38                        | 15 | 68.91                    | 2024  | 563.5 | 536.7 | 337.4    | 165.7            | 753.0            |
| LNFP-II | PRE-TERM  | 39                        | 20 | 17.50                    | 1942  | 532.3 | 454.1 | 417.3    | 205.1            | 765.8            |
| LNFP-II | PRE-TERM  | 40                        | 10 | 149.3                    | 1468  | 629.9 | 434.4 | 669.5    | 253.9            | 864.6            |
| LNFP-II | PRE-TERM  | 41                        | 15 | 17.50                    | 2373  | 502.9 | 591.2 | 323.9    | 198.3            | 550.0            |
| LNFP-II | PRE-TERM  | 42                        | 9  | 141.6                    | 1432  | 601.2 | 393.6 | 624.3    | 249.7            | 748.0            |
| LNFP-II | PRE-TERM  | 43                        | 13 | 17.50                    | 1476  | 463.5 | 363.4 | 427.7    | 207.8            | 528.8            |
| LNFP-II | PRE-TERM  | 44                        | 8  | 160.6                    | 1571  | 626.4 | 423.4 | 565.8    | 452.8            | 673.2            |
| LNFP-II | PRE-TERM  | 45                        | 12 | 17.50                    | 2593  | 571.4 | 692.4 | 373.6    | 266.7            | 497.5            |
| LNFP-II | PRE-TERM  | 46                        | 8  | 121.9                    | 1367  | 536.2 | 400.2 | 511.3    | 247.1            | 627.5            |

**Table S3 Concentration of Human Milk Oligosaccharides in Term or Preterm Milk At Specified Postmenstrual Age**

*\* When there are results below the method limit of quantification (LoQ) the result has been assigned value of  $0.5 \times \text{LoQ}$ , hence the minimum value appears to be the same in many cases. When a large number of datapoints are below LoQ this can also have the effect that the median = minimum.*

| HMO      | Study Arm | Postmenstrual Age (weeks) | N  | HMO Concentration (mg/L) |       |       |       |          |                  |                  |
|----------|-----------|---------------------------|----|--------------------------|-------|-------|-------|----------|------------------|------------------|
|          |           |                           |    | min *                    | max   | mean  | sd    | median * | Quartile 1 (25%) | Quartile 3 (75%) |
| LNFP-II  | PRE-TERM  | 47                        | 3  | 168.9                    | 386.9 | 311.6 | 123.6 | 378.9    | 273.9            | 382.9            |
| LNFP-II  | PRE-TERM  | 48                        | 5  | 118.0                    | 1201  | 544.8 | 419.9 | 483.9    | 267.1            | 654.3            |
| LNFP-II  | TERM      | 38                        | 2  | 222.1                    | 251.5 | 236.8 | 20.83 | 236.8    | 229.4            | 244.2            |
| LNFP-II  | TERM      | 39                        | 10 | 85.02                    | 1238  | 317.3 | 342.7 | 196.2    | 129.8            | 351.4            |
| LNFP-II  | TERM      | 40                        | 19 | 17.50                    | 1616  | 554.5 | 486.6 | 344.2    | 245.8            | 832.7            |
| LNFP-II  | TERM      | 41                        | 27 | 17.50                    | 1884  | 492.9 | 468.4 | 323.3    | 183.4            | 635.6            |
| LNFP-II  | TERM      | 42                        | 29 | 17.50                    | 1684  | 548.6 | 516.9 | 366.6    | 203.2            | 649.6            |
| LNFP-II  | TERM      | 43                        | 28 | 17.50                    | 1565  | 521.4 | 452.8 | 354.1    | 199.5            | 673.9            |
| LNFP-II  | TERM      | 44                        | 27 | 17.50                    | 1411  | 446.0 | 383.6 | 280.9    | 201.8            | 572.3            |
| LNFP-II  | TERM      | 45                        | 28 | 17.50                    | 1476  | 421.4 | 354.0 | 322.8    | 184.8            | 456.3            |
| LNFP-II  | TERM      | 46                        | 24 | 17.50                    | 1171  | 430.0 | 340.3 | 319.5    | 171.8            | 589.4            |
| LNFP-II  | TERM      | 47                        | 18 | 17.50                    | 1272  | 425.7 | 377.5 | 304.2    | 140.1            | 629.5            |
| LNFP-II  | TERM      | 48                        | 7  | 17.50                    | 382.2 | 186.3 | 111.2 | 180.5    | 145.5            | 216.5            |
| LNFP-III | PRE-TERM  | 29                        | 1  | 682.1                    | 682.1 | 682.1 | NA    | 682.1    | 682.1            | 682.1            |
| LNFP-III | PRE-TERM  | 30                        | 10 | 55.72                    | 569.3 | 378.2 | 141.8 | 386.6    | 335.5            | 404.2            |
| LNFP-III | PRE-TERM  | 31                        | 12 | 35.70                    | 640.0 | 341.1 | 153.9 | 333.7    | 288.7            | 429.7            |
| LNFP-III | PRE-TERM  | 32                        | 17 | 40.94                    | 654.7 | 298.6 | 152.0 | 275.6    | 236.0            | 352.3            |
| LNFP-III | PRE-TERM  | 33                        | 24 | 49.93                    | 727.3 | 306.2 | 172.4 | 285.6    | 173.0            | 399.6            |
| LNFP-III | PRE-TERM  | 34                        | 25 | 52.14                    | 779.2 | 320.9 | 173.2 | 316.4    | 232.4            | 347.4            |
| LNFP-III | PRE-TERM  | 35                        | 24 | 49.25                    | 733.6 | 317.2 | 145.5 | 306.6    | 250.1            | 399.9            |
| LNFP-III | PRE-TERM  | 36                        | 25 | 17.50                    | 711.8 | 305.3 | 140.5 | 300.2    | 214.3            | 365.7            |
| LNFP-III | PRE-TERM  | 37                        | 23 | 52.97                    | 767.7 | 349.0 | 154.1 | 352.3    | 263.4            | 412.5            |
| LNFP-III | PRE-TERM  | 38                        | 15 | 55.78                    | 615.4 | 330.9 | 158.8 | 316.3    | 223.0            | 420.8            |
| LNFP-III | PRE-TERM  | 39                        | 20 | 60.20                    | 847.4 | 350.0 | 181.4 | 335.2    | 249.6            | 411.4            |
| LNFP-III | PRE-TERM  | 40                        | 10 | 175.8                    | 534.0 | 314.1 | 126.6 | 268.2    | 233.8            | 418.8            |
| LNFP-III | PRE-TERM  | 41                        | 15 | 50.94                    | 653.0 | 422.7 | 168.8 | 434.5    | 355.8            | 563.5            |
| LNFP-III | PRE-TERM  | 42                        | 9  | 177.7                    | 526.8 | 307.9 | 111.3 | 298.4    | 228.7            | 314.2            |
| LNFP-III | PRE-TERM  | 43                        | 13 | 74.13                    | 635.2 | 403.4 | 157.0 | 404.7    | 336.1            | 522.3            |
| LNFP-III | PRE-TERM  | 44                        | 8  | 204.0                    | 528.1 | 329.0 | 127.8 | 271.7    | 232.8            | 441.3            |
| LNFP-III | PRE-TERM  | 45                        | 12 | 89.27                    | 599.0 | 347.5 | 166.0 | 356.4    | 226.1            | 441.3            |

**Table S3 Concentration of Human Milk Oligosaccharides in Term or Preterm Milk At Specified Postmenstrual Age**

\* When there are results below the method limit of quantification (LoQ) the result has been assigned value of  $0.5 \times \text{LoQ}$ , hence the minimum value appears to be the same in many cases. When a large number of datapoints are below LoQ this can also have the effect that the median = minimum.

| HMO      | Study Arm | Postmenstrual Age (weeks) | N  | HMO Concentration (mg/L) |       |       |       |          |                  |                  |
|----------|-----------|---------------------------|----|--------------------------|-------|-------|-------|----------|------------------|------------------|
|          |           |                           |    | min *                    | max   | mean  | sd    | median * | Quartile 1 (25%) | Quartile 3 (75%) |
| LNFP-III | PRE-TERM  | 46                        | 8  | 187.7                    | 750.3 | 379.7 | 183.1 | 352.6    | 268.0            | 422.8            |
| LNFP-III | PRE-TERM  | 47                        | 3  | 140.7                    | 774.0 | 387.5 | 339.0 | 247.7    | 194.2            | 510.9            |
| LNFP-III | PRE-TERM  | 48                        | 5  | 266.6                    | 345.5 | 305.7 | 37.30 | 309.2    | 268.8            | 338.5            |
| LNFP-III | TERM      | 38                        | 2  | 444.4                    | 477.8 | 461.1 | 23.62 | 461.1    | 452.8            | 469.5            |
| LNFP-III | TERM      | 39                        | 10 | 192.5                    | 826.9 | 414.9 | 174.3 | 413.4    | 317.8            | 465.4            |
| LNFP-III | TERM      | 40                        | 19 | 76.48                    | 1268  | 423.9 | 254.3 | 390.8    | 321.4            | 454.5            |
| LNFP-III | TERM      | 41                        | 27 | 169.8                    | 1169  | 361.6 | 190.9 | 327.1    | 236.8            | 420.8            |
| LNFP-III | TERM      | 42                        | 29 | 153.7                    | 911.0 | 319.0 | 145.9 | 288.8    | 233.0            | 339.0            |
| LNFP-III | TERM      | 43                        | 28 | 165.5                    | 823.9 | 306.6 | 141.6 | 264.8    | 221.7            | 338.2            |
| LNFP-III | TERM      | 44                        | 27 | 153.3                    | 714.0 | 290.3 | 111.8 | 269.2    | 223.3            | 322.4            |
| LNFP-III | TERM      | 45                        | 28 | 17.50                    | 786.1 | 310.5 | 140.9 | 291.6    | 229.8            | 361.9            |
| LNFP-III | TERM      | 46                        | 24 | 108.0                    | 703.6 | 322.4 | 126.2 | 303.7    | 235.1            | 377.2            |
| LNFP-III | TERM      | 47                        | 18 | 164.2                    | 569.7 | 312.3 | 116.4 | 269.7    | 234.1            | 357.3            |
| LNFP-III | TERM      | 48                        | 7  | 209.5                    | 398.2 | 279.2 | 63.68 | 262.5    | 239.4            | 302.8            |
| LNFP-V   | PRE-TERM  | 29                        | 1  | 320.9                    | 320.9 | 320.9 | NA    | 320.9    | 320.9            | 320.9            |
| LNFP-V   | PRE-TERM  | 30                        | 10 | 12.00                    | 289.0 | 76.92 | 97.54 | 21.27    | 12.00            | 119.8            |
| LNFP-V   | PRE-TERM  | 31                        | 12 | 12.00                    | 266.9 | 81.16 | 90.54 | 44.14    | 22.49            | 92.26            |
| LNFP-V   | PRE-TERM  | 32                        | 17 | 12.00                    | 286.3 | 74.16 | 84.38 | 40.14    | 12.00            | 88.93            |
| LNFP-V   | PRE-TERM  | 33                        | 24 | 12.00                    | 300.2 | 81.13 | 94.73 | 39.11    | 12.00            | 84.76            |
| LNFP-V   | PRE-TERM  | 34                        | 25 | 12.00                    | 317.8 | 85.63 | 92.32 | 57.47    | 25.18            | 92.28            |
| LNFP-V   | PRE-TERM  | 35                        | 24 | 12.00                    | 359.5 | 92.63 | 97.67 | 61.18    | 32.02            | 102.6            |
| LNFP-V   | PRE-TERM  | 36                        | 25 | 12.00                    | 363.8 | 89.74 | 98.44 | 53.67    | 12.00            | 106.3            |
| LNFP-V   | PRE-TERM  | 37                        | 23 | 12.00                    | 285.4 | 79.91 | 79.86 | 51.51    | 30.57            | 91.35            |
| LNFP-V   | PRE-TERM  | 38                        | 15 | 12.00                    | 309.0 | 83.19 | 89.48 | 36.45    | 12.00            | 116.1            |
| LNFP-V   | PRE-TERM  | 39                        | 20 | 12.00                    | 299.1 | 75.75 | 74.97 | 48.92    | 25.20            | 98.53            |
| LNFP-V   | PRE-TERM  | 40                        | 10 | 12.00                    | 207.0 | 89.15 | 72.85 | 90.29    | 25.92            | 114.3            |
| LNFP-V   | PRE-TERM  | 41                        | 15 | 12.00                    | 328.8 | 66.61 | 84.84 | 36.69    | 19.45            | 69.63            |
| LNFP-V   | PRE-TERM  | 42                        | 9  | 12.00                    | 165.1 | 76.96 | 56.06 | 85.68    | 12.00            | 111.5            |
| LNFP-V   | PRE-TERM  | 43                        | 13 | 12.00                    | 200.7 | 57.88 | 48.98 | 46.12    | 28.01            | 68.72            |
| LNFP-V   | PRE-TERM  | 44                        | 8  | 12.00                    | 194.4 | 82.49 | 57.29 | 71.97    | 52.95            | 106.7            |

**Table S3 Concentration of Human Milk Oligosaccharides in Term or Preterm Milk At Specified Postmenstrual Age**

*\* When there are results below the method limit of quantification (LoQ) the result has been assigned value of  $0.5 \times \text{LoQ}$ , hence the minimum value appears to be the same in many cases. When a large number of datapoints are below LoQ this can also have the effect that the median = minimum.*

| HMO    | Study Arm | Postmenstrual Age (weeks) | N  | HMO Concentration (mg/L) |       |       |       |          |                  |                  |
|--------|-----------|---------------------------|----|--------------------------|-------|-------|-------|----------|------------------|------------------|
|        |           |                           |    | min *                    | max   | mean  | sd    | median * | Quartile 1 (25%) | Quartile 3 (75%) |
| LNFP-V | PRE-TERM  | 45                        | 12 | 12.00                    | 408.7 | 79.84 | 109.6 | 40.67    | 28.29            | 71.91            |
| LNFP-V | PRE-TERM  | 46                        | 8  | 12.00                    | 202.6 | 68.99 | 61.58 | 64.62    | 24.09            | 82.31            |
| LNFP-V | PRE-TERM  | 47                        | 3  | 12.00                    | 47.17 | 31.89 | 18.03 | 36.51    | 24.26            | 41.84            |
| LNFP-V | PRE-TERM  | 48                        | 5  | 12.00                    | 169.4 | 66.40 | 61.49 | 52.56    | 29.49            | 68.59            |
| LNFP-V | TERM      | 38                        | 2  | 12.00                    | 30.70 | 21.35 | 13.23 | 21.35    | 16.68            | 26.03            |
| LNFP-V | TERM      | 39                        | 10 | 12.00                    | 138.6 | 38.49 | 40.92 | 18.65    | 12.00            | 48.24            |
| LNFP-V | TERM      | 40                        | 19 | 12.00                    | 203.7 | 79.83 | 68.39 | 54.21    | 24.86            | 135.8            |
| LNFP-V | TERM      | 41                        | 27 | 12.00                    | 349.1 | 82.07 | 87.14 | 49.87    | 33.34            | 70.70            |
| LNFP-V | TERM      | 42                        | 29 | 12.00                    | 247.0 | 76.53 | 67.41 | 52.36    | 35.88            | 75.41            |
| LNFP-V | TERM      | 43                        | 28 | 12.00                    | 202.6 | 65.25 | 60.47 | 45.53    | 12.00            | 76.82            |
| LNFP-V | TERM      | 44                        | 27 | 12.00                    | 228.2 | 63.66 | 56.31 | 41.53    | 26.81            | 74.83            |
| LNFP-V | TERM      | 45                        | 28 | 12.00                    | 226.4 | 59.85 | 52.18 | 45.12    | 26.25            | 68.26            |
| LNFP-V | TERM      | 46                        | 24 | 12.00                    | 162.9 | 59.97 | 43.87 | 54.98    | 27.51            | 87.87            |
| LNFP-V | TERM      | 47                        | 18 | 12.00                    | 196.7 | 62.33 | 52.74 | 55.57    | 12.00            | 95.88            |
| LNFP-V | TERM      | 48                        | 7  | 12.00                    | 38.23 | 17.47 | 10.19 | 12.00    | 12.00            | 18.02            |
| LNnDFH | PRE-TERM  | 29                        | 1  | 543.1                    | 543.1 | 543.1 | NA    | 543.1    | 543.1            | 543.1            |
| LNnDFH | PRE-TERM  | 30                        | 10 | 14.00                    | 299.7 | 65.58 | 87.74 | 36.61    | 14.00            | 58.54            |
| LNnDFH | PRE-TERM  | 31                        | 12 | 14.00                    | 333.0 | 58.57 | 89.41 | 30.92    | 14.00            | 56.50            |
| LNnDFH | PRE-TERM  | 32                        | 17 | 14.00                    | 195.3 | 33.14 | 44.88 | 14.00    | 14.00            | 39.02            |
| LNnDFH | PRE-TERM  | 33                        | 24 | 14.00                    | 430.0 | 49.09 | 93.24 | 14.00    | 14.00            | 17.77            |
| LNnDFH | PRE-TERM  | 34                        | 25 | 14.00                    | 196.9 | 44.37 | 53.81 | 14.00    | 14.00            | 40.63            |
| LNnDFH | PRE-TERM  | 35                        | 24 | 14.00                    | 185.4 | 39.71 | 49.06 | 14.00    | 14.00            | 48.78            |
| LNnDFH | PRE-TERM  | 36                        | 25 | 14.00                    | 156.3 | 29.22 | 33.00 | 14.00    | 14.00            | 35.39            |
| LNnDFH | PRE-TERM  | 37                        | 23 | 14.00                    | 183.2 | 37.05 | 45.59 | 14.00    | 14.00            | 33.87            |
| LNnDFH | PRE-TERM  | 38                        | 15 | 14.00                    | 119.8 | 44.69 | 41.10 | 14.00    | 14.00            | 78.15            |
| LNnDFH | PRE-TERM  | 39                        | 20 | 14.00                    | 107.7 | 29.96 | 25.58 | 14.00    | 14.00            | 36.04            |
| LNnDFH | PRE-TERM  | 40                        | 10 | 14.00                    | 115.8 | 39.15 | 36.74 | 21.33    | 14.00            | 49.21            |
| LNnDFH | PRE-TERM  | 41                        | 15 | 14.00                    | 85.19 | 34.09 | 26.33 | 14.00    | 14.00            | 48.12            |
| LNnDFH | PRE-TERM  | 42                        | 9  | 14.00                    | 125.7 | 42.22 | 39.14 | 29.34    | 14.00            | 46.53            |
| LNnDFH | PRE-TERM  | 43                        | 13 | 14.00                    | 75.44 | 27.19 | 20.62 | 14.00    | 14.00            | 35.14            |



**Table S3 Concentration of Human Milk Oligosaccharides in Term or Preterm Milk At Specified Postmenstrual Age**

\* When there are results below the method limit of quantification (LoQ) the result has been assigned value of  $0.5 \times \text{LoQ}$ , hence the minimum value appears to be the same in many cases. When a large number of datapoints are below LoQ this can also have the effect that the median = minimum.

| HMO    | Study Arm | Postmenstrual Age (weeks) | N  | HMO Concentration (mg/L) |       |       |        |          |                  |                  |
|--------|-----------|---------------------------|----|--------------------------|-------|-------|--------|----------|------------------|------------------|
|        |           |                           |    | min *                    | max   | mean  | sd     | median * | Quartile 1 (25%) | Quartile 3 (75%) |
| LNnDFH | PRE-TERM  | 44                        | 8  | 14.00                    | 109.1 | 45.82 | 35.13  | 35.98    | 14.00            | 69.41            |
| LNnDFH | PRE-TERM  | 45                        | 12 | 14.00                    | 67.12 | 28.88 | 19.99  | 14.00    | 14.00            | 48.57            |
| LNnDFH | PRE-TERM  | 46                        | 8  | 14.00                    | 733.1 | 123.6 | 247.3  | 40.52    | 14.00            | 60.41            |
| LNnDFH | PRE-TERM  | 47                        | 3  | 14.00                    | 105.1 | 44.36 | 52.59  | 14.00    | 14.00            | 59.54            |
| LNnDFH | PRE-TERM  | 48                        | 5  | 14.00                    | 94.85 | 45.30 | 33.64  | 48.19    | 14.00            | 55.46            |
| LNnDFH | TERM      | 38                        | 2  | 50.53                    | 106.3 | 78.39 | 39.40  | 78.39    | 64.46            | 92.32            |
| LNnDFH | TERM      | 39                        | 10 | 14.00                    | 181.8 | 48.42 | 54.80  | 21.27    | 14.00            | 66.86            |
| LNnDFH | TERM      | 40                        | 19 | 14.00                    | 172.8 | 47.32 | 42.27  | 31.75    | 14.00            | 61.65            |
| LNnDFH | TERM      | 41                        | 27 | 14.00                    | 110.0 | 28.38 | 24.84  | 14.00    | 14.00            | 38.58            |
| LNnDFH | TERM      | 42                        | 29 | 14.00                    | 52.71 | 22.80 | 13.03  | 14.00    | 14.00            | 32.72            |
| LNnDFH | TERM      | 43                        | 28 | 14.00                    | 77.46 | 24.52 | 16.48  | 14.00    | 14.00            | 33.95            |
| LNnDFH | TERM      | 44                        | 27 | 14.00                    | 85.76 | 21.69 | 16.36  | 14.00    | 14.00            | 21.39            |
| LNnDFH | TERM      | 45                        | 28 | 14.00                    | 132.3 | 29.27 | 31.72  | 14.00    | 14.00            | 18.78            |
| LNnDFH | TERM      | 46                        | 24 | 14.00                    | 94.89 | 25.57 | 22.95  | 14.00    | 14.00            | 19.52            |
| LNnDFH | TERM      | 47                        | 18 | 14.00                    | 94.07 | 29.09 | 26.13  | 14.00    | 14.00            | 29.94            |
| LNnDFH | TERM      | 48                        | 7  | 14.00                    | 70.18 | 27.23 | 20.80  | 14.00    | 14.00            | 32.22            |
| LNnFP  | PRE-TERM  | 29                        | 1  | 28.70                    | 28.70 | 28.70 | NA     | 28.70    | 28.70            | 28.70            |
| LNnFP  | PRE-TERM  | 30                        | 10 | 9.500                    | 89.76 | 23.87 | 24.54  | 14.98    | 9.500            | 26.85            |
| LNnFP  | PRE-TERM  | 31                        | 12 | 9.500                    | 50.62 | 17.40 | 12.43  | 9.500    | 9.500            | 22.03            |
| LNnFP  | PRE-TERM  | 32                        | 17 | 9.500                    | 50.34 | 13.75 | 12.10  | 9.500    | 9.500            | 9.500            |
| LNnFP  | PRE-TERM  | 33                        | 24 | 9.500                    | 59.82 | 17.12 | 13.54  | 9.500    | 9.500            | 19.57            |
| LNnFP  | PRE-TERM  | 34                        | 25 | 9.500                    | 61.67 | 14.36 | 11.41  | 9.500    | 9.500            | 9.500            |
| LNnFP  | PRE-TERM  | 35                        | 24 | 9.500                    | 60.47 | 16.64 | 13.03  | 9.500    | 9.500            | 20.39            |
| LNnFP  | PRE-TERM  | 36                        | 25 | 9.500                    | 55.24 | 15.30 | 11.82  | 9.500    | 9.500            | 20.00            |
| LNnFP  | PRE-TERM  | 37                        | 23 | 9.500                    | 57.65 | 14.28 | 10.89  | 9.500    | 9.500            | 14.26            |
| LNnFP  | PRE-TERM  | 38                        | 15 | 9.500                    | 32.68 | 13.15 | 8.015  | 9.500    | 9.500            | 9.500            |
| LNnFP  | PRE-TERM  | 39                        | 20 | 9.500                    | 60.19 | 16.76 | 15.42  | 9.500    | 9.500            | 12.56            |
| LNnFP  | PRE-TERM  | 40                        | 10 | 9.500                    | 9.500 | 9.500 | 0.0000 | 9.500    | 9.500            | 9.500            |
| LNnFP  | PRE-TERM  | 41                        | 15 | 9.500                    | 53.23 | 17.04 | 14.37  | 9.500    | 9.500            | 14.94            |
| LNnFP  | PRE-TERM  | 42                        | 9  | 9.500                    | 21.55 | 10.84 | 4.017  | 9.500    | 9.500            | 9.500            |

**Table S3 Concentration of Human Milk Oligosaccharides in Term or Preterm Milk At Specified Postmenstrual Age**

*\* When there are results below the method limit of quantification (LoQ) the result has been assigned value of  $0.5 \times \text{LoQ}$ , hence the minimum value appears to be the same in many cases. When a large number of datapoints are below LoQ this can also have the effect that the median = minimum.*

| HMO   | Study Arm | Postmenstrual Age (weeks) | N  | HMO Concentration (mg/L) |       |       |        |          |                  |                  |
|-------|-----------|---------------------------|----|--------------------------|-------|-------|--------|----------|------------------|------------------|
|       |           |                           |    | min *                    | max   | mean  | sd     | median * | Quartile 1 (25%) | Quartile 3 (75%) |
| LNnFP | PRE-TERM  | 43                        | 13 | 9.500                    | 70.04 | 16.87 | 18.72  | 9.500    | 9.500            | 9.500            |
| LNnFP | PRE-TERM  | 44                        | 8  | 9.500                    | 22.23 | 12.40 | 5.409  | 9.500    | 9.500            | 12.12            |
| LNnFP | PRE-TERM  | 45                        | 12 | 9.500                    | 88.05 | 19.49 | 24.64  | 9.500    | 9.500            | 9.500            |
| LNnFP | PRE-TERM  | 46                        | 8  | 9.500                    | 22.67 | 11.15 | 4.657  | 9.500    | 9.500            | 9.500            |
| LNnFP | PRE-TERM  | 47                        | 3  | 9.500                    | 56.14 | 25.05 | 26.93  | 9.500    | 9.500            | 32.82            |
| LNnFP | PRE-TERM  | 48                        | 5  | 9.500                    | 23.76 | 12.35 | 6.376  | 9.500    | 9.500            | 9.500            |
| LNnFP | TERM      | 38                        | 2  | 9.500                    | 19.80 | 14.65 | 7.285  | 14.65    | 12.08            | 17.23            |
| LNnFP | TERM      | 39                        | 10 | 9.500                    | 49.07 | 19.22 | 15.92  | 9.500    | 9.500            | 31.04            |
| LNnFP | TERM      | 40                        | 19 | 9.500                    | 56.56 | 19.88 | 14.79  | 9.500    | 9.500            | 27.35            |
| LNnFP | TERM      | 41                        | 27 | 9.500                    | 29.02 | 11.98 | 5.501  | 9.500    | 9.500            | 9.500            |
| LNnFP | TERM      | 42                        | 29 | 9.500                    | 49.35 | 13.97 | 9.452  | 9.500    | 9.500            | 9.500            |
| LNnFP | TERM      | 43                        | 28 | 9.500                    | 66.17 | 15.38 | 12.51  | 9.500    | 9.500            | 19.35            |
| LNnFP | TERM      | 44                        | 27 | 9.500                    | 52.21 | 12.74 | 8.869  | 9.500    | 9.500            | 9.500            |
| LNnFP | TERM      | 45                        | 28 | 9.500                    | 56.13 | 13.96 | 9.658  | 9.500    | 9.500            | 19.18            |
| LNnFP | TERM      | 46                        | 24 | 9.500                    | 37.85 | 14.11 | 7.439  | 9.500    | 9.500            | 20.27            |
| LNnFP | TERM      | 47                        | 18 | 9.500                    | 28.50 | 13.45 | 6.782  | 9.500    | 9.500            | 17.67            |
| LNnFP | TERM      | 48                        | 7  | 9.500                    | 9.500 | 9.500 | 0.0000 | 9.500    | 9.500            | 9.500            |
| LNnT  | PRE-TERM  | 29                        | 1  | 165.4                    | 165.4 | 165.4 | NA     | 165.4    | 165.4            | 165.4            |
| LNnT  | PRE-TERM  | 30                        | 10 | 137.3                    | 546.3 | 311.4 | 128.0  | 290.4    | 222.9            | 394.7            |
| LNnT  | PRE-TERM  | 31                        | 12 | 118.3                    | 435.5 | 253.3 | 97.79  | 272.6    | 149.0            | 301.6            |
| LNnT  | PRE-TERM  | 32                        | 17 | 79.69                    | 413.1 | 214.0 | 89.45  | 216.4    | 154.6            | 258.6            |
| LNnT  | PRE-TERM  | 33                        | 24 | 67.88                    | 404.7 | 196.7 | 87.06  | 197.6    | 126.1            | 239.0            |
| LNnT  | PRE-TERM  | 34                        | 25 | 66.51                    | 383.2 | 193.1 | 99.31  | 182.2    | 106.3            | 240.1            |
| LNnT  | PRE-TERM  | 35                        | 24 | 60.11                    | 397.8 | 186.6 | 102.0  | 182.2    | 97.08            | 248.7            |
| LNnT  | PRE-TERM  | 36                        | 25 | 43.09                    | 341.2 | 169.5 | 85.23  | 167.2    | 96.86            | 244.2            |
| LNnT  | PRE-TERM  | 37                        | 23 | 48.51                    | 372.0 | 167.9 | 81.05  | 163.5    | 102.6            | 206.5            |
| LNnT  | PRE-TERM  | 38                        | 15 | 12.00                    | 314.7 | 132.5 | 91.65  | 118.6    | 70.68            | 162.1            |
| LNnT  | PRE-TERM  | 39                        | 20 | 33.45                    | 440.8 | 168.9 | 96.22  | 166.3    | 96.12            | 215.4            |
| LNnT  | PRE-TERM  | 40                        | 10 | 36.42                    | 211.5 | 134.9 | 68.75  | 131.3    | 85.50            | 202.4            |
| LNnT  | PRE-TERM  | 41                        | 15 | 27.39                    | 464.0 | 151.6 | 115.6  | 140.1    | 71.45            | 166.0            |

**Table S3 Concentration of Human Milk Oligosaccharides in Term or Preterm Milk At Specified Postmenstrual Age**

*\* When there are results below the method limit of quantification (LoQ) the result has been assigned value of  $0.5 \times \text{LoQ}$ , hence the minimum value appears to be the same in many cases. When a large number of datapoints are below LoQ this can also have the effect that the median = minimum.*

| HMO | Study Arm | Postmenstrual Age (weeks) | N  | HMO Concentration (mg/L) |       |       |       |          |                  |                  |
|-----|-----------|---------------------------|----|--------------------------|-------|-------|-------|----------|------------------|------------------|
|     |           |                           |    | min *                    | max   | mean  | sd    | median * | Quartile 1 (25%) | Quartile 3 (75%) |
| LNT | PRE-TERM  | 42                        | 9  | 24.44                    | 279.5 | 117.4 | 80.66 | 95.54    | 77.16            | 144.7            |
| LNT | PRE-TERM  | 43                        | 13 | 12.00                    | 379.4 | 134.9 | 101.5 | 110.0    | 81.67            | 174.6            |
| LNT | PRE-TERM  | 44                        | 8  | 32.38                    | 229.8 | 110.2 | 67.42 | 109.4    | 59.42            | 140.0            |
| LNT | PRE-TERM  | 45                        | 12 | 12.00                    | 444.3 | 130.1 | 126.4 | 79.71    | 39.86            | 166.9            |
| LNT | PRE-TERM  | 46                        | 8  | 38.00                    | 180.1 | 106.2 | 47.79 | 88.84    | 82.30            | 148.1            |
| LNT | PRE-TERM  | 47                        | 3  | 34.77                    | 437.3 | 184.3 | 220.3 | 80.91    | 57.84            | 259.1            |
| LNT | PRE-TERM  | 48                        | 5  | 25.55                    | 208.8 | 108.4 | 71.92 | 80.85    | 75.22            | 151.8            |
| LNT | TERM      | 38                        | 2  | 377.9                    | 400.4 | 389.2 | 15.95 | 389.2    | 383.5            | 394.8            |
| LNT | TERM      | 39                        | 10 | 162.4                    | 565.3 | 356.0 | 136.6 | 372.1    | 253.5            | 457.5            |
| LNT | TERM      | 40                        | 19 | 113.9                    | 452.2 | 279.2 | 93.31 | 275.6    | 220.7            | 341.0            |
| LNT | TERM      | 41                        | 27 | 67.58                    | 435.1 | 253.5 | 94.96 | 258.9    | 181.4            | 313.8            |
| LNT | TERM      | 42                        | 29 | 52.63                    | 350.3 | 182.9 | 71.69 | 179.2    | 129.4            | 222.7            |
| LNT | TERM      | 43                        | 28 | 54.25                    | 369.5 | 165.2 | 77.77 | 151.5    | 112.9            | 218.0            |
| LNT | TERM      | 44                        | 27 | 12.00                    | 311.2 | 141.5 | 73.49 | 135.3    | 92.80            | 174.9            |
| LNT | TERM      | 45                        | 28 | 12.00                    | 281.9 | 144.7 | 67.45 | 138.6    | 103.3            | 183.5            |
| LNT | TERM      | 46                        | 24 | 35.80                    | 284.9 | 131.2 | 66.18 | 133.8    | 76.93            | 150.8            |
| LNT | TERM      | 47                        | 18 | 27.23                    | 245.5 | 123.0 | 54.53 | 124.3    | 79.41            | 159.2            |
| LNT | TERM      | 48                        | 7  | 64.38                    | 195.3 | 108.0 | 43.21 | 101.1    | 82.14            | 115.5            |
| LNT | PRE-TERM  | 29                        | 1  | 3029                     | 3029  | 3029  | NA    | 3029     | 3029             | 3029             |
| LNT | PRE-TERM  | 30                        | 10 | 630.4                    | 3296  | 1224  | 841.8 | 869.2    | 720.9            | 1315             |
| LNT | PRE-TERM  | 31                        | 12 | 965.1                    | 2903  | 1489  | 567.3 | 1194     | 1099             | 1718             |
| LNT | PRE-TERM  | 32                        | 17 | 298.8                    | 2283  | 1309  | 564.6 | 1167     | 916.9            | 1816             |
| LNT | PRE-TERM  | 33                        | 24 | 341.5                    | 2537  | 1278  | 576.4 | 1168     | 892.1            | 1758             |
| LNT | PRE-TERM  | 34                        | 25 | 653.0                    | 2851  | 1333  | 642.7 | 1059     | 880.4            | 1628             |
| LNT | PRE-TERM  | 35                        | 24 | 479.3                    | 2498  | 1332  | 625.0 | 1167     | 877.4            | 1723             |
| LNT | PRE-TERM  | 36                        | 25 | 469.1                    | 2737  | 1252  | 668.7 | 1127     | 609.9            | 1563             |
| LNT | PRE-TERM  | 37                        | 23 | 356.6                    | 2468  | 1066  | 529.5 | 1116     | 626.0            | 1323             |
| LNT | PRE-TERM  | 38                        | 15 | 144.1                    | 1942  | 921.6 | 593.8 | 789.0    | 400.3            | 1362             |
| LNT | PRE-TERM  | 39                        | 20 | 332.2                    | 2376  | 978.1 | 586.6 | 765.9    | 557.5            | 1386             |
| LNT | PRE-TERM  | 40                        | 10 | 317.3                    | 2184  | 1059  | 655.9 | 1051     | 468.0            | 1378             |

**Table S3 Concentration of Human Milk Oligosaccharides in Term or Preterm Milk At Specified Postmenstrual Age**

*\* When there are results below the method limit of quantification (LoQ) the result has been assigned value of  $0.5 \times \text{LoQ}$ , hence the minimum value appears to be the same in many cases. When a large number of datapoints are below LoQ this can also have the effect that the median = minimum.*

| HMO  | Study Arm | Postmenstrual Age (weeks) | N  | HMO Concentration (mg/L) |       |       |       |          |                  |                  |
|------|-----------|---------------------------|----|--------------------------|-------|-------|-------|----------|------------------|------------------|
|      |           |                           |    | min *                    | max   | mean  | sd    | median * | Quartile 1 (25%) | Quartile 3 (75%) |
| LNT  | PRE-TERM  | 41                        | 15 | 175.3                    | 1554  | 715.2 | 392.1 | 658.7    | 478.3            | 932.0            |
| LNT  | PRE-TERM  | 42                        | 9  | 287.6                    | 1271  | 821.3 | 354.9 | 909.4    | 614.5            | 1043             |
| LNT  | PRE-TERM  | 43                        | 13 | 304.6                    | 1191  | 712.2 | 315.8 | 675.4    | 502.5            | 1056             |
| LNT  | PRE-TERM  | 44                        | 8  | 301.3                    | 1051  | 777.6 | 252.6 | 847.9    | 701.9            | 912.8            |
| LNT  | PRE-TERM  | 45                        | 12 | 145.2                    | 2113  | 728.1 | 514.0 | 686.9    | 417.4            | 830.5            |
| LNT  | PRE-TERM  | 46                        | 8  | 232.8                    | 1162  | 623.6 | 323.0 | 543.0    | 423.7            | 771.6            |
| LNT  | PRE-TERM  | 47                        | 3  | 248.2                    | 773.5 | 569.6 | 281.7 | 687.1    | 467.6            | 730.3            |
| LNT  | PRE-TERM  | 48                        | 5  | 205.0                    | 879.6 | 548.4 | 314.6 | 597.9    | 242.5            | 816.9            |
| LNT  | TERM      | 38                        | 2  | 598.9                    | 923.2 | 761.1 | 229.3 | 761.1    | 680.0            | 842.1            |
| LNT  | TERM      | 39                        | 10 | 199.8                    | 1253  | 694.0 | 410.7 | 568.7    | 370.0            | 1092             |
| LNT  | TERM      | 40                        | 19 | 214.3                    | 3400  | 1351  | 731.6 | 1205     | 855.9            | 1507             |
| LNT  | TERM      | 41                        | 27 | 359.0                    | 3848  | 1275  | 706.2 | 1181     | 730.9            | 1467             |
| LNT  | TERM      | 42                        | 29 | 358.7                    | 3092  | 1289  | 554.9 | 1206     | 985.8            | 1639             |
| LNT  | TERM      | 43                        | 28 | 359.8                    | 3087  | 1176  | 607.2 | 1180     | 697.1            | 1354             |
| LNT  | TERM      | 44                        | 27 | 313.1                    | 2480  | 1026  | 581.5 | 846.7    | 602.5            | 1318             |
| LNT  | TERM      | 45                        | 28 | 307.2                    | 2109  | 902.6 | 495.5 | 762.8    | 571.2            | 1158             |
| LNT  | TERM      | 46                        | 24 | 213.7                    | 2251  | 877.0 | 498.1 | 789.0    | 520.3            | 1179             |
| LNT  | TERM      | 47                        | 18 | 217.7                    | 1852  | 892.8 | 503.1 | 830.2    | 480.1            | 1263             |
| LNT  | TERM      | 48                        | 7  | 269.1                    | 856.9 | 526.3 | 243.8 | 462.5    | 314.6            | 733.1            |
| LSTb | PRE-TERM  | 29                        | 1  | 183.1                    | 183.1 | 183.1 | NA    | 183.1    | 183.1            | 183.1            |
| LSTb | PRE-TERM  | 30                        | 10 | 54.76                    | 159.2 | 88.48 | 32.50 | 81.22    | 65.26            | 95.82            |
| LSTb | PRE-TERM  | 31                        | 12 | 71.27                    | 182.1 | 114.7 | 37.18 | 109.5    | 83.08            | 147.9            |
| LSTb | PRE-TERM  | 32                        | 17 | 44.25                    | 217.4 | 108.8 | 54.55 | 100.9    | 62.51            | 151.5            |
| LSTb | PRE-TERM  | 33                        | 24 | 41.49                    | 256.1 | 111.8 | 58.27 | 91.29    | 68.50            | 146.2            |
| LSTb | PRE-TERM  | 34                        | 25 | 49.85                    | 334.7 | 113.6 | 59.09 | 100.3    | 86.22            | 133.5            |
| LSTb | PRE-TERM  | 35                        | 24 | 47.34                    | 314.7 | 118.8 | 58.95 | 115.3    | 80.11            | 142.6            |
| LSTb | PRE-TERM  | 36                        | 25 | 42.09                    | 423.9 | 108.6 | 76.33 | 99.07    | 59.00            | 129.6            |
| LSTb | PRE-TERM  | 37                        | 23 | 37.86                    | 400.7 | 107.7 | 73.27 | 95.27    | 57.96            | 131.8            |
| LSTb | PRE-TERM  | 38                        | 15 | 7.000                    | 161.7 | 88.58 | 45.97 | 92.79    | 50.74            | 127.6            |
| LSTb | PRE-TERM  | 39                        | 20 | 38.99                    | 156.5 | 89.38 | 39.22 | 87.17    | 50.34            | 122.2            |

**Table S3 Concentration of Human Milk Oligosaccharides in Term or Preterm Milk At Specified Postmenstrual Age**

*\* When there are results below the method limit of quantification (LoQ) the result has been assigned value of  $0.5 \times \text{LoQ}$ , hence the minimum value appears to be the same in many cases. When a large number of datapoints are below LoQ this can also have the effect that the median = minimum.*

| HMO  | Study Arm | Postmenstrual Age (weeks) | N  | HMO Concentration (mg/L) |       |       |       |          |                  |                  |
|------|-----------|---------------------------|----|--------------------------|-------|-------|-------|----------|------------------|------------------|
|      |           |                           |    | min *                    | max   | mean  | sd    | median * | Quartile 1 (25%) | Quartile 3 (75%) |
| LSTb | PRE-TERM  | 40                        | 10 | 48.94                    | 146.3 | 99.10 | 35.48 | 105.0    | 66.00            | 129.3            |
| LSTb | PRE-TERM  | 41                        | 15 | 34.87                    | 405.6 | 106.5 | 94.87 | 77.14    | 48.20            | 120.6            |
| LSTb | PRE-TERM  | 42                        | 9  | 39.45                    | 143.0 | 86.36 | 40.30 | 85.72    | 51.40            | 105.5            |
| LSTb | PRE-TERM  | 43                        | 13 | 31.54                    | 243.3 | 101.3 | 60.09 | 91.07    | 54.05            | 113.3            |
| LSTb | PRE-TERM  | 44                        | 8  | 43.51                    | 140.5 | 78.68 | 30.83 | 77.98    | 61.18            | 87.59            |
| LSTb | PRE-TERM  | 45                        | 12 | 33.70                    | 247.3 | 90.12 | 53.23 | 83.33    | 70.10            | 91.55            |
| LSTb | PRE-TERM  | 46                        | 8  | 25.18                    | 114.5 | 77.32 | 27.06 | 82.46    | 63.98            | 93.05            |
| LSTb | PRE-TERM  | 47                        | 3  | 36.39                    | 84.41 | 61.71 | 24.12 | 64.34    | 50.36            | 74.38            |
| LSTb | PRE-TERM  | 48                        | 5  | 23.33                    | 106.9 | 61.31 | 31.49 | 51.67    | 49.11            | 75.54            |
| LSTb | TERM      | 38                        | 2  | 56.67                    | 94.71 | 75.69 | 26.90 | 75.69    | 66.18            | 85.20            |
| LSTb | TERM      | 39                        | 10 | 33.70                    | 102.3 | 68.80 | 20.81 | 69.85    | 54.57            | 81.62            |
| LSTb | TERM      | 40                        | 19 | 28.89                    | 196.6 | 87.92 | 44.00 | 81.00    | 57.45            | 98.49            |
| LSTb | TERM      | 41                        | 27 | 15.52                    | 160.5 | 79.79 | 34.79 | 72.16    | 53.55            | 102.7            |
| LSTb | TERM      | 42                        | 29 | 32.58                    | 163.7 | 81.61 | 30.88 | 77.06    | 57.48            | 106.5            |
| LSTb | TERM      | 43                        | 28 | 36.28                    | 127.3 | 78.93 | 28.02 | 81.08    | 55.97            | 98.34            |
| LSTb | TERM      | 44                        | 27 | 20.15                    | 166.6 | 77.71 | 34.58 | 70.91    | 56.40            | 108.1            |
| LSTb | TERM      | 45                        | 28 | 7.000                    | 147.4 | 71.07 | 36.37 | 63.39    | 46.25            | 95.69            |
| LSTb | TERM      | 46                        | 24 | 18.33                    | 177.0 | 73.74 | 40.61 | 66.97    | 45.66            | 100.7            |
| LSTb | TERM      | 47                        | 18 | 7.000                    | 152.6 | 69.85 | 44.19 | 62.95    | 33.26            | 108.2            |
| LSTb | TERM      | 48                        | 7  | 22.20                    | 119.2 | 64.07 | 35.39 | 55.09    | 38.07            | 87.93            |
| LSTc | PRE-TERM  | 29                        | 1  | 184.0                    | 184.0 | 184.0 | NA    | 184.0    | 184.0            | 184.0            |
| LSTc | PRE-TERM  | 30                        | 10 | 95.07                    | 747.9 | 402.2 | 245.4 | 465.3    | 148.5            | 595.8            |
| LSTc | PRE-TERM  | 31                        | 12 | 37.98                    | 629.5 | 321.4 | 209.4 | 341.3    | 137.2            | 466.4            |
| LSTc | PRE-TERM  | 32                        | 17 | 31.79                    | 1019  | 312.5 | 245.4 | 284.3    | 136.2            | 439.1            |
| LSTc | PRE-TERM  | 33                        | 24 | 28.75                    | 767.6 | 267.0 | 209.7 | 207.4    | 114.8            | 304.7            |
| LSTc | PRE-TERM  | 34                        | 25 | 24.49                    | 622.9 | 204.5 | 140.1 | 199.2    | 101.3            | 244.8            |
| LSTc | PRE-TERM  | 35                        | 24 | 23.78                    | 402.8 | 166.3 | 94.56 | 140.5    | 88.29            | 228.6            |
| LSTc | PRE-TERM  | 36                        | 25 | 17.24                    | 371.1 | 133.9 | 88.26 | 102.6    | 69.44            | 180.2            |
| LSTc | PRE-TERM  | 37                        | 23 | 17.82                    | 355.6 | 121.2 | 78.50 | 111.0    | 62.29            | 139.3            |
| LSTc | PRE-TERM  | 38                        | 15 | 20.21                    | 211.2 | 98.81 | 56.26 | 95.39    | 55.35            | 110.1            |

**Table S3 Concentration of Human Milk Oligosaccharides in Term or Preterm Milk At Specified Postmenstrual Age**

\* When there are results below the method limit of quantification (LoQ) the result has been assigned value of  $0.5 \times \text{LoQ}$ , hence the minimum value appears to be the same in many cases. When a large number of datapoints are below LoQ this can also have the effect that the median = minimum.

| HMO       | Study Arm | Postmenstrual Age (weeks) | N  | HMO Concentration (mg/L) |       |       |       |          |                  |                  |
|-----------|-----------|---------------------------|----|--------------------------|-------|-------|-------|----------|------------------|------------------|
|           |           |                           |    | min *                    | max   | mean  | sd    | median * | Quartile 1 (25%) | Quartile 3 (75%) |
| LSTc      | PRE-TERM  | 39                        | 20 | 22.11                    | 211.9 | 89.33 | 50.87 | 79.03    | 59.97            | 114.4            |
| LSTc      | PRE-TERM  | 40                        | 10 | 36.31                    | 151.3 | 79.19 | 36.93 | 61.32    | 59.22            | 100.1            |
| LSTc      | PRE-TERM  | 41                        | 15 | 20.28                    | 209.1 | 68.29 | 46.60 | 55.68    | 38.33            | 82.43            |
| LSTc      | PRE-TERM  | 42                        | 9  | 28.83                    | 125.3 | 60.84 | 29.79 | 48.35    | 46.32            | 71.72            |
| LSTc      | PRE-TERM  | 43                        | 13 | 10.91                    | 91.88 | 39.25 | 21.77 | 35.01    | 24.47            | 49.47            |
| LSTc      | PRE-TERM  | 44                        | 8  | 22.05                    | 100.6 | 51.84 | 30.13 | 38.40    | 30.32            | 71.35            |
| LSTc      | PRE-TERM  | 45                        | 12 | 9.258                    | 102.5 | 34.12 | 30.92 | 21.42    | 15.13            | 34.81            |
| LSTc      | PRE-TERM  | 46                        | 8  | 22.75                    | 68.68 | 42.58 | 17.38 | 41.04    | 27.74            | 52.78            |
| LSTc      | PRE-TERM  | 47                        | 3  | 12.11                    | 96.78 | 44.70 | 45.57 | 25.21    | 18.66            | 61.00            |
| LSTc      | PRE-TERM  | 48                        | 5  | 14.03                    | 67.61 | 33.39 | 22.72 | 21.13    | 18.59            | 45.59            |
| LSTc      | TERM      | 38                        | 2  | 329.6                    | 575.3 | 452.4 | 173.7 | 452.4    | 391.0            | 513.9            |
| LSTc      | TERM      | 39                        | 10 | 215.4                    | 1199  | 565.8 | 303.8 | 492.9    | 370.4            | 624.9            |
| LSTc      | TERM      | 40                        | 19 | 36.80                    | 1169  | 544.5 | 338.4 | 461.0    | 302.2            | 752.5            |
| LSTc      | TERM      | 41                        | 27 | 103.3                    | 1156  | 477.6 | 239.7 | 496.0    | 340.9            | 555.2            |
| LSTc      | TERM      | 42                        | 29 | 64.34                    | 620.3 | 298.8 | 128.5 | 297.0    | 217.0            | 388.5            |
| LSTc      | TERM      | 43                        | 28 | 32.73                    | 367.7 | 208.3 | 91.49 | 203.2    | 132.4            | 283.1            |
| LSTc      | TERM      | 44                        | 27 | 30.19                    | 254.9 | 148.8 | 54.82 | 153.7    | 113.7            | 191.8            |
| LSTc      | TERM      | 45                        | 28 | 20.07                    | 282.9 | 130.8 | 69.18 | 107.5    | 95.05            | 165.3            |
| LSTc      | TERM      | 46                        | 24 | 16.92                    | 261.1 | 104.5 | 58.28 | 95.62    | 74.55            | 120.4            |
| LSTc      | TERM      | 47                        | 18 | 36.24                    | 221.6 | 91.31 | 53.74 | 72.93    | 57.85            | 110.3            |
| LSTc      | TERM      | 48                        | 7  | 37.33                    | 141.6 | 69.39 | 33.98 | 61.01    | 53.88            | 69.03            |
| MFLNH-III | PRE-TERM  | 29                        | 1  | 166.0                    | 166.0 | 166.0 | NA    | 166.0    | 166.0            | 166.0            |
| MFLNH-III | PRE-TERM  | 30                        | 10 | 70.38                    | 452.0 | 236.0 | 126.4 | 220.9    | 156.0            | 269.1            |
| MFLNH-III | PRE-TERM  | 31                        | 12 | 58.75                    | 724.8 | 370.6 | 206.1 | 333.7    | 229.2            | 518.2            |
| MFLNH-III | PRE-TERM  | 32                        | 17 | 98.01                    | 743.2 | 346.9 | 185.6 | 314.2    | 200.7            | 423.2            |
| MFLNH-III | PRE-TERM  | 33                        | 24 | 71.20                    | 820.2 | 350.6 | 184.3 | 338.0    | 206.5            | 445.0            |
| MFLNH-III | PRE-TERM  | 34                        | 25 | 65.81                    | 856.2 | 339.6 | 199.4 | 358.5    | 170.6            | 454.7            |
| MFLNH-III | PRE-TERM  | 35                        | 24 | 64.26                    | 790.5 | 320.4 | 173.3 | 283.2    | 232.1            | 364.6            |
| MFLNH-III | PRE-TERM  | 36                        | 25 | 77.34                    | 753.0 | 332.7 | 152.2 | 329.7    | 234.5            | 397.0            |
| MFLNH-III | PRE-TERM  | 37                        | 23 | 66.95                    | 438.0 | 265.9 | 105.8 | 259.1    | 191.0            | 352.6            |

**Table S3 Concentration of Human Milk Oligosaccharides in Term or Preterm Milk At Specified Postmenstrual Age**

*\* When there are results below the method limit of quantification (LoQ) the result has been assigned value of  $0.5 \times \text{LoQ}$ , hence the minimum value appears to be the same in many cases. When a large number of datapoints are below LoQ this can also have the effect that the median = minimum.*

| HMO       | Study Arm | Postmenstrual Age (weeks) | N  | HMO Concentration (mg/L) |       |       |       |          |                  |                  |
|-----------|-----------|---------------------------|----|--------------------------|-------|-------|-------|----------|------------------|------------------|
|           |           |                           |    | min *                    | max   | mean  | sd    | median * | Quartile 1 (25%) | Quartile 3 (75%) |
| MFLNH-III | PRE-TERM  | 38                        | 15 | 64.97                    | 707.1 | 260.8 | 172.6 | 236.9    | 146.6            | 321.4            |
| MFLNH-III | PRE-TERM  | 39                        | 20 | 58.71                    | 492.1 | 213.7 | 120.4 | 188.1    | 132.5            | 269.0            |
| MFLNH-III | PRE-TERM  | 40                        | 10 | 79.18                    | 551.6 | 263.6 | 159.7 | 267.9    | 131.9            | 378.6            |
| MFLNH-III | PRE-TERM  | 41                        | 15 | 17.50                    | 279.2 | 112.0 | 76.63 | 95.92    | 67.56            | 116.0            |
| MFLNH-III | PRE-TERM  | 42                        | 9  | 50.65                    | 386.3 | 212.6 | 101.7 | 221.7    | 150.6            | 245.5            |
| MFLNH-III | PRE-TERM  | 43                        | 13 | 17.50                    | 323.4 | 101.5 | 76.09 | 86.39    | 58.13            | 125.0            |
| MFLNH-III | PRE-TERM  | 44                        | 8  | 81.42                    | 337.9 | 178.5 | 89.47 | 155.2    | 121.3            | 204.7            |
| MFLNH-III | PRE-TERM  | 45                        | 12 | 17.50                    | 199.1 | 84.10 | 48.60 | 77.52    | 51.54            | 107.5            |
| MFLNH-III | PRE-TERM  | 46                        | 8  | 53.20                    | 324.5 | 131.5 | 92.16 | 101.1    | 76.76            | 135.6            |
| MFLNH-III | PRE-TERM  | 47                        | 3  | 49.98                    | 185.3 | 107.4 | 69.94 | 86.82    | 68.40            | 136.0            |
| MFLNH-III | PRE-TERM  | 48                        | 5  | 17.50                    | 231.9 | 117.7 | 91.35 | 89.25    | 56.39            | 193.4            |
| MFLNH-III | TERM      | 38                        | 2  | 137.0                    | 188.4 | 162.7 | 36.40 | 162.7    | 149.8            | 175.6            |
| MFLNH-III | TERM      | 39                        | 10 | 17.50                    | 469.8 | 193.5 | 151.5 | 156.7    | 70.76            | 311.2            |
| MFLNH-III | TERM      | 40                        | 19 | 17.50                    | 613.8 | 253.5 | 139.0 | 236.2    | 151.3            | 329.4            |
| MFLNH-III | TERM      | 41                        | 27 | 121.3                    | 772.4 | 376.8 | 178.1 | 337.0    | 290.2            | 430.9            |
| MFLNH-III | TERM      | 42                        | 29 | 194.2                    | 934.4 | 443.2 | 196.3 | 380.0    | 321.3            | 505.6            |
| MFLNH-III | TERM      | 43                        | 28 | 81.47                    | 976.4 | 417.8 | 240.3 | 345.0    | 259.6            | 541.9            |
| MFLNH-III | TERM      | 44                        | 27 | 17.50                    | 886.4 | 366.5 | 219.1 | 324.0    | 223.7            | 462.2            |
| MFLNH-III | TERM      | 45                        | 28 | 17.50                    | 758.8 | 294.6 | 160.6 | 272.2    | 154.0            | 397.6            |
| MFLNH-III | TERM      | 46                        | 24 | 17.50                    | 600.2 | 263.8 | 151.0 | 255.6    | 160.8            | 328.4            |
| MFLNH-III | TERM      | 47                        | 18 | 57.71                    | 875.6 | 300.8 | 177.1 | 284.7    | 193.7            | 379.3            |
| MFLNH-III | TERM      | 48                        | 7  | 108.5                    | 299.2 | 211.8 | 67.79 | 194.4    | 179.1            | 261.3            |
