# Supplementary material for: Human Milk Oligosaccharides in the Milk of Mothers Delivering Term versus Preterm Infants
Source: MDPI journal article supplement (doi:10.3390/nu11061282), 2019-06-05
Supplement: s1 [file s1]

**Table S2 Concentration of Human Milk Oligosaccharides in Term or Preterm Milk At Different Weeks Postpartum Separated By Milk Group**

\* When there are results below the method limit of quantification (LoQ) the result has been assigned value of  $0.5 \times \text{LoQ}$ , hence the minimum value appears to be the same in many cases. When a large number of datapoints are below LoQ this can also have the effect that the median = minimum.

| HMO  | Milk Group | Study Arm | Week<br>Post Partum | N  | HMO Concentration (mg/L) |       |       |        |          |                     |                     |
|------|------------|-----------|---------------------|----|--------------------------|-------|-------|--------|----------|---------------------|---------------------|
|      |            |           |                     |    | min *                    | max   | mean  | sd     | median * | Quartile 1<br>(25%) | Quartile 3<br>(75%) |
| 2'FL | G1         | PRE-TERM  | 1                   | 19 | 53.00                    | 5478  | 3113  | 1192   | 3370     | 2384                | 3878                |
| 2'FL | G1         | PRE-TERM  | 2                   | 19 | 68.21                    | 3095  | 2015  | 782.8  | 2047     | 1678                | 2622                |
| 2'FL | G1         | PRE-TERM  | 3                   | 19 | 40.96                    | 2995  | 1927  | 763.8  | 1958     | 1589                | 2569                |
| 2'FL | G1         | PRE-TERM  | 4                   | 18 | 35.03                    | 3592  | 2046  | 881.8  | 2132     | 1591                | 2507                |
| 2'FL | G1         | PRE-TERM  | 5                   | 19 | 37.54                    | 3063  | 1937  | 719.5  | 1852     | 1634                | 2470                |
| 2'FL | G1         | PRE-TERM  | 6                   | 18 | 32.13                    | 3335  | 1930  | 866.6  | 1890     | 1577                | 2568                |
| 2'FL | G1         | PRE-TERM  | 7                   | 18 | 30.17                    | 2969  | 1898  | 749.0  | 1833     | 1524                | 2558                |
| 2'FL | G1         | PRE-TERM  | 8                   | 18 | 27.93                    | 3353  | 1944  | 832.2  | 1741     | 1505                | 2487                |
| 2'FL | G1         | PRE-TERM  | 10                  | 18 | 22.31                    | 3369  | 1794  | 808.6  | 1588     | 1328                | 2370                |
| 2'FL | G1         | PRE-TERM  | 12                  | 15 | 19.65                    | 3574  | 1686  | 849.5  | 1529     | 1270                | 1999                |
| 2'FL | G1         | PRE-TERM  | 14                  | 15 | 32.90                    | 2946  | 1663  | 827.5  | 1464     | 1159                | 2138                |
| 2'FL | G1         | PRE-TERM  | 16                  | 15 | 30.28                    | 3455  | 1622  | 867.5  | 1569     | 962.3               | 2149                |
| 2'FL | G1         | TERM      | 1                   | 21 | 2571                     | 5570  | 3917  | 956.8  | 3701     | 3186                | 4731                |
| 2'FL | G1         | TERM      | 2                   | 19 | 1676                     | 3664  | 2724  | 561.0  | 2838     | 2259                | 3143                |
| 2'FL | G1         | TERM      | 3                   | 21 | 1518                     | 4225  | 2641  | 705.2  | 2551     | 2140                | 2945                |
| 2'FL | G1         | TERM      | 4                   | 21 | 1387                     | 3711  | 2457  | 609.8  | 2461     | 2085                | 2888                |
| 2'FL | G1         | TERM      | 5                   | 21 | 1325                     | 3962  | 2387  | 732.6  | 2111     | 1752                | 2989                |
| 2'FL | G1         | TERM      | 6                   | 20 | 1028                     | 3323  | 2246  | 720.9  | 2313     | 1716                | 3018                |
| 2'FL | G1         | TERM      | 7                   | 20 | 622.0                    | 3067  | 2068  | 733.8  | 1986     | 1575                | 2622                |
| 2'FL | G1         | TERM      | 8                   | 21 | 241.7                    | 3201  | 1963  | 810.1  | 2102     | 1399                | 2701                |
| 2'FL | G2         | PRE-TERM  | 1                   | 5  | 6.500                    | 47.07 | 25.87 | 16.25  | 26.98    | 13.76               | 35.03               |
| 2'FL | G2         | PRE-TERM  | 2                   | 5  | 6.500                    | 21.88 | 9.576 | 6.879  | 6.500    | 6.500               | 6.500               |
| 2'FL | G2         | PRE-TERM  | 3                   | 5  | 6.500                    | 18.12 | 8.82  | 5.196  | 6.500    | 6.500               | 6.500               |
| 2'FL | G2         | PRE-TERM  | 4                   | 5  | 6.500                    | 116.4 | 28.48 | 49.14  | 6.500    | 6.500               | 6.500               |
| 2'FL | G2         | PRE-TERM  | 5                   | 5  | 6.500                    | 48.64 | 16.27 | 18.33  | 6.500    | 6.500               | 13.19               |
| 2'FL | G2         | PRE-TERM  | 6                   | 5  | 6.500                    | 30.75 | 11.35 | 10.84  | 6.500    | 6.500               | 6.500               |
| 2'FL | G2         | PRE-TERM  | 7                   | 5  | 6.500                    | 26.23 | 10.45 | 8.824  | 6.500    | 6.500               | 6.500               |
| 2'FL | G2         | PRE-TERM  | 8                   | 5  | 6.500                    | 22.44 | 9.689 | 7.131  | 6.500    | 6.500               | 6.500               |
| 2'FL | G2         | PRE-TERM  | 10                  | 4  | 6.500                    | 20.67 | 10.04 | 7.083  | 6.500    | 6.500               | 10.04               |
| 2'FL | G2         | PRE-TERM  | 12                  | 5  | 6.500                    | 18.86 | 8.972 | 5.528  | 6.500    | 6.500               | 6.500               |
| 2'FL | G2         | PRE-TERM  | 14                  | 5  | 6.500                    | 16.58 | 8.517 | 4.509  | 6.500    | 6.500               | 6.500               |
| 2'FL | G2         | PRE-TERM  | 16                  | 3  | 6.500                    | 15.22 | 9.406 | 5.034  | 6.500    | 6.500               | 10.86               |
| 2'FL | G2         | TERM      | 1                   | 5  | 6.500                    | 25.68 | 10.34 | 8.578  | 6.500    | 6.500               | 6.500               |
| 2'FL | G2         | TERM      | 2                   | 5  | 6.500                    | 6.500 | 6.500 | 0.0000 | 6.500    | 6.500               | 6.500               |

**Table S2 Concentration of Human Milk Oligosaccharides in Term or Preterm Milk At Different Weeks Postpartum Separated By Milk Group**

*\* When there are results below the method limit of quantification (LoQ) the result has been assigned value of  $0.5 \times \text{LoQ}$ , hence the minimum value appears to be the same in many cases. When a large number of datapoints are below LoQ this can also have the effect that the median = minimum.*

| HMO  | Milk Group | Study Arm | Week Post Partum | N | HMO Concentration (mg/L) |       |       |        |          |                  |                  |
|------|------------|-----------|------------------|---|--------------------------|-------|-------|--------|----------|------------------|------------------|
|      |            |           |                  |   | min *                    | max   | mean  | sd     | median * | Quartile 1 (25%) | Quartile 3 (75%) |
| 2'FL | G2         | TERM      | 3                | 5 | 6.500                    | 6.500 | 6.500 | 0.0000 | 6.500    | 6.500            | 6.500            |
| 2'FL | G2         | TERM      | 4                | 5 | 6.500                    | 14.11 | 8.023 | 3.405  | 6.500    | 6.500            | 6.500            |
| 2'FL | G2         | TERM      | 5                | 5 | 6.500                    | 6.500 | 6.500 | 0.0000 | 6.500    | 6.500            | 6.500            |
| 2'FL | G2         | TERM      | 6                | 5 | 6.500                    | 6.500 | 6.500 | 0.0000 | 6.500    | 6.500            | 6.500            |
| 2'FL | G2         | TERM      | 7                | 5 | 6.500                    | 6.500 | 6.500 | 0.0000 | 6.500    | 6.500            | 6.500            |
| 2'FL | G2         | TERM      | 8                | 5 | 6.500                    | 6.500 | 6.500 | 0.0000 | 6.500    | 6.500            | 6.500            |
| 2'FL | G3         | PRE-TERM  | 1                | 1 | 3314                     | 3314  | 3314  | NA     | 3314     | 3314             | 3314             |
| 2'FL | G3         | PRE-TERM  | 2                | 1 | 3465                     | 3465  | 3465  | NA     | 3465     | 3465             | 3465             |
| 2'FL | G3         | PRE-TERM  | 3                | 1 | 2900                     | 2900  | 2900  | NA     | 2900     | 2900             | 2900             |
| 2'FL | G3         | PRE-TERM  | 4                | 1 | 2645                     | 2645  | 2645  | NA     | 2645     | 2645             | 2645             |
| 2'FL | G3         | PRE-TERM  | 5                | 1 | 3001                     | 3001  | 3001  | NA     | 3001     | 3001             | 3001             |
| 2'FL | G3         | PRE-TERM  | 6                | 1 | 3071                     | 3071  | 3071  | NA     | 3071     | 3071             | 3071             |
| 2'FL | G3         | PRE-TERM  | 7                | 1 | 2571                     | 2571  | 2571  | NA     | 2571     | 2571             | 2571             |
| 2'FL | G3         | PRE-TERM  | 8                | 1 | 2316                     | 2316  | 2316  | NA     | 2316     | 2316             | 2316             |
| 2'FL | G3         | PRE-TERM  | 10               | 1 | 2139                     | 2139  | 2139  | NA     | 2139     | 2139             | 2139             |
| 2'FL | G3         | PRE-TERM  | 12               | 1 | 2079                     | 2079  | 2079  | NA     | 2079     | 2079             | 2079             |
| 2'FL | G3         | PRE-TERM  | 14               | 1 | 2189                     | 2189  | 2189  | NA     | 2189     | 2189             | 2189             |
| 2'FL | G3         | PRE-TERM  | 16               | 1 | 2024                     | 2024  | 2024  | NA     | 2024     | 2024             | 2024             |
| 2'FL | G3         | TERM      | 1                | 1 | 6076                     | 6076  | 6076  | NA     | 6076     | 6076             | 6076             |
| 2'FL | G3         | TERM      | 2                | 1 | 5572                     | 5572  | 5572  | NA     | 5572     | 5572             | 5572             |
| 2'FL | G3         | TERM      | 3                | 1 | 4390                     | 4390  | 4390  | NA     | 4390     | 4390             | 4390             |
| 2'FL | G3         | TERM      | 4                | 1 | 4556                     | 4556  | 4556  | NA     | 4556     | 4556             | 4556             |
| 2'FL | G3         | TERM      | 5                | 1 | 4090                     | 4090  | 4090  | NA     | 4090     | 4090             | 4090             |
| 2'FL | G3         | TERM      | 6                | 1 | 3666                     | 3666  | 3666  | NA     | 3666     | 3666             | 3666             |
| 2'FL | G3         | TERM      | 7                | 1 | 3530                     | 3530  | 3530  | NA     | 3530     | 3530             | 3530             |
| 2'FL | G3         | TERM      | 8                | 1 | 4133                     | 4133  | 4133  | NA     | 4133     | 4133             | 4133             |
| 2'FL | G4         | TERM      | 1                | 1 | 26.81                    | 26.81 | 26.81 | NA     | 26.81    | 26.81            | 26.81            |
| 2'FL | G4         | TERM      | 2                | 1 | 16.16                    | 16.16 | 16.16 | NA     | 16.16    | 16.16            | 16.16            |
| 2'FL | G4         | TERM      | 3                | 1 | 6.500                    | 6.500 | 6.500 | NA     | 6.500    | 6.500            | 6.500            |
| 2'FL | G4         | TERM      | 4                | 1 | 6.500                    | 6.500 | 6.500 | NA     | 6.500    | 6.500            | 6.500            |
| 2'FL | G4         | TERM      | 5                | 1 | 6.500                    | 6.500 | 6.500 | NA     | 6.500    | 6.500            | 6.500            |
| 2'FL | G4         | TERM      | 6                | 1 | 6.500                    | 6.500 | 6.500 | NA     | 6.500    | 6.500            | 6.500            |
| 2'FL | G4         | TERM      | 7                | 1 | 6.500                    | 6.500 | 6.500 | NA     | 6.500    | 6.500            | 6.500            |
| 2'FL | G4         | TERM      | 8                | 1 | 6.500                    | 6.500 | 6.500 | NA     | 6.500    | 6.500            | 6.500            |

**Table S2 Concentration of Human Milk Oligosaccharides in Term or Preterm Milk At Different Weeks Postpartum Separated By Milk Group**

*\* When there are results below the method limit of quantification (LoQ) the result has been assigned value of  $0.5 \times \text{LoQ}$ , hence the minimum value appears to be the same in many cases. When a large number of datapoints are below LoQ this can also have the effect that the median = minimum.*

| HMO  | Milk Group | Study Arm | Week Post Partum | N  | HMO Concentration (mg/L) |       |       |        |          |                  |                  |
|------|------------|-----------|------------------|----|--------------------------|-------|-------|--------|----------|------------------|------------------|
|      |            |           |                  |    | min *                    | max   | mean  | sd     | median * | Quartile 1 (25%) | Quartile 3 (75%) |
| 3'GL | G1         | PRE-TERM  | 1                | 19 | 4.000                    | 28.82 | 11.65 | 8.458  | 10.11    | 4.000            | 15.28            |
| 3'GL | G1         | PRE-TERM  | 2                | 19 | 4.000                    | 20.70 | 6.310 | 4.559  | 4.000    | 4.000            | 6.308            |
| 3'GL | G1         | PRE-TERM  | 3                | 19 | 4.000                    | 21.56 | 6.059 | 4.692  | 4.000    | 4.000            | 4.000            |
| 3'GL | G1         | PRE-TERM  | 4                | 18 | 4.000                    | 30.06 | 6.107 | 6.277  | 4.000    | 4.000            | 4.000            |
| 3'GL | G1         | PRE-TERM  | 5                | 19 | 4.000                    | 37.74 | 6.783 | 7.762  | 4.000    | 4.000            | 6.015            |
| 3'GL | G1         | PRE-TERM  | 6                | 18 | 4.000                    | 70.00 | 9.943 | 15.79  | 4.000    | 4.000            | 7.968            |
| 3'GL | G1         | PRE-TERM  | 7                | 18 | 4.000                    | 23.04 | 6.942 | 5.753  | 4.000    | 4.000            | 7.291            |
| 3'GL | G1         | PRE-TERM  | 8                | 18 | 4.000                    | 21.24 | 6.859 | 5.261  | 4.000    | 4.000            | 7.090            |
| 3'GL | G1         | PRE-TERM  | 10               | 18 | 4.000                    | 21.49 | 5.979 | 4.894  | 4.000    | 4.000            | 4.000            |
| 3'GL | G1         | PRE-TERM  | 12               | 15 | 4.000                    | 15.76 | 6.895 | 4.405  | 4.000    | 4.000            | 10.47            |
| 3'GL | G1         | PRE-TERM  | 14               | 15 | 4.000                    | 15.21 | 5.885 | 3.511  | 4.000    | 4.000            | 6.445            |
| 3'GL | G1         | PRE-TERM  | 16               | 15 | 4.000                    | 12.84 | 5.268 | 2.769  | 4.000    | 4.000            | 4.000            |
| 3'GL | G1         | TERM      | 1                | 21 | 4.000                    | 20.76 | 11.59 | 5.024  | 11.79    | 8.823            | 14.33            |
| 3'GL | G1         | TERM      | 2                | 19 | 4.000                    | 19.07 | 7.104 | 4.628  | 4.000    | 4.000            | 10.78            |
| 3'GL | G1         | TERM      | 3                | 21 | 4.000                    | 17.67 | 7.013 | 4.025  | 4.000    | 4.000            | 9.627            |
| 3'GL | G1         | TERM      | 4                | 21 | 4.000                    | 16.81 | 5.832 | 3.382  | 4.000    | 4.000            | 8.211            |
| 3'GL | G1         | TERM      | 5                | 21 | 4.000                    | 33.42 | 6.908 | 7.269  | 4.000    | 4.000            | 4.000            |
| 3'GL | G1         | TERM      | 6                | 20 | 4.000                    | 16.35 | 4.990 | 3.148  | 4.000    | 4.000            | 4.000            |
| 3'GL | G1         | TERM      | 7                | 20 | 4.000                    | 14.81 | 5.018 | 2.733  | 4.000    | 4.000            | 4.000            |
| 3'GL | G1         | TERM      | 8                | 21 | 4.000                    | 20.73 | 5.663 | 4.503  | 4.000    | 4.000            | 4.000            |
| 3'GL | G2         | PRE-TERM  | 1                | 5  | 4.000                    | 21.02 | 13.37 | 6.565  | 12.56    | 11.32            | 17.98            |
| 3'GL | G2         | PRE-TERM  | 2                | 5  | 4.000                    | 11.13 | 6.268 | 3.273  | 4.000    | 4.000            | 8.204            |
| 3'GL | G2         | PRE-TERM  | 3                | 5  | 4.000                    | 9.894 | 5.179 | 2.636  | 4.000    | 4.000            | 4.000            |
| 3'GL | G2         | PRE-TERM  | 4                | 5  | 4.000                    | 4.000 | 4.000 | 0.0000 | 4.000    | 4.000            | 4.000            |
| 3'GL | G2         | PRE-TERM  | 5                | 5  | 4.000                    | 16.72 | 6.544 | 5.688  | 4.000    | 4.000            | 4.000            |
| 3'GL | G2         | PRE-TERM  | 6                | 5  | 4.000                    | 12.18 | 6.816 | 3.940  | 4.000    | 4.000            | 9.895            |
| 3'GL | G2         | PRE-TERM  | 7                | 5  | 4.000                    | 4.000 | 4.000 | 0.0000 | 4.000    | 4.000            | 4.000            |
| 3'GL | G2         | PRE-TERM  | 8                | 5  | 4.000                    | 9.118 | 5.826 | 2.531  | 4.000    | 4.000            | 8.011            |
| 3'GL | G2         | PRE-TERM  | 10               | 4  | 4.000                    | 11.78 | 5.945 | 3.890  | 4.000    | 4.000            | 5.945            |
| 3'GL | G2         | PRE-TERM  | 12               | 5  | 4.000                    | 4.000 | 4.000 | 0.0000 | 4.000    | 4.000            | 4.000            |
| 3'GL | G2         | PRE-TERM  | 14               | 5  | 4.000                    | 12.65 | 6.983 | 4.171  | 4.000    | 4.000            | 10.27            |
| 3'GL | G2         | PRE-TERM  | 16               | 3  | 4.000                    | 4.000 | 4.000 | 0.0000 | 4.000    | 4.000            | 4.000            |
| 3'GL | G2         | TERM      | 1                | 5  | 9.509                    | 21.33 | 15.56 | 4.788  | 14.96    | 12.76            | 19.25            |
| 3'GL | G2         | TERM      | 2                | 5  | 4.000                    | 10.91 | 5.382 | 3.091  | 4.000    | 4.000            | 4.000            |

**Table S2 Concentration of Human Milk Oligosaccharides in Term or Preterm Milk At Different Weeks Postpartum Separated By Milk Group**

\* When there are results below the method limit of quantification (LoQ) the result has been assigned value of  $0.5 \times \text{LoQ}$ , hence the minimum value appears to be the same in many cases. When a large number of datapoints are below LoQ this can also have the effect that the median = minimum.

| HMO  | Milk Group | Study Arm | Week Post Partum | N | HMO Concentration (mg/L) |       |       |        |          |                  |                  |
|------|------------|-----------|------------------|---|--------------------------|-------|-------|--------|----------|------------------|------------------|
|      |            |           |                  |   | min *                    | max   | mean  | sd     | median * | Quartile 1 (25%) | Quartile 3 (75%) |
| 3'GL | G2         | TERM      | 3                | 5 | 4.000                    | 8.782 | 4.956 | 2.139  | 4.000    | 4.000            | 4.000            |
| 3'GL | G2         | TERM      | 4                | 5 | 4.000                    | 4.000 | 4.000 | 0.0000 | 4.000    | 4.000            | 4.000            |
| 3'GL | G2         | TERM      | 5                | 5 | 4.000                    | 4.000 | 4.000 | 0.0000 | 4.000    | 4.000            | 4.000            |
| 3'GL | G2         | TERM      | 6                | 5 | 4.000                    | 4.000 | 4.000 | 0.0000 | 4.000    | 4.000            | 4.000            |
| 3'GL | G2         | TERM      | 7                | 5 | 4.000                    | 4.000 | 4.000 | 0.0000 | 4.000    | 4.000            | 4.000            |
| 3'GL | G2         | TERM      | 8                | 5 | 4.000                    | 4.000 | 4.000 | 0.0000 | 4.000    | 4.000            | 4.000            |
| 3'GL | G3         | PRE-TERM  | 1                | 1 | 4.000                    | 4.000 | 4.000 | NA     | 4.000    | 4.000            | 4.000            |
| 3'GL | G3         | PRE-TERM  | 2                | 1 | 4.000                    | 4.000 | 4.000 | NA     | 4.000    | 4.000            | 4.000            |
| 3'GL | G3         | PRE-TERM  | 3                | 1 | 4.000                    | 4.000 | 4.000 | NA     | 4.000    | 4.000            | 4.000            |
| 3'GL | G3         | PRE-TERM  | 4                | 1 | 4.000                    | 4.000 | 4.000 | NA     | 4.000    | 4.000            | 4.000            |
| 3'GL | G3         | PRE-TERM  | 5                | 1 | 4.000                    | 4.000 | 4.000 | NA     | 4.000    | 4.000            | 4.000            |
| 3'GL | G3         | PRE-TERM  | 6                | 1 | 4.000                    | 4.000 | 4.000 | NA     | 4.000    | 4.000            | 4.000            |
| 3'GL | G3         | PRE-TERM  | 7                | 1 | 4.000                    | 4.000 | 4.000 | NA     | 4.000    | 4.000            | 4.000            |
| 3'GL | G3         | PRE-TERM  | 8                | 1 | 4.000                    | 4.000 | 4.000 | NA     | 4.000    | 4.000            | 4.000            |
| 3'GL | G3         | PRE-TERM  | 10               | 1 | 4.000                    | 4.000 | 4.000 | NA     | 4.000    | 4.000            | 4.000            |
| 3'GL | G3         | PRE-TERM  | 12               | 1 | 4.000                    | 4.000 | 4.000 | NA     | 4.000    | 4.000            | 4.000            |
| 3'GL | G3         | PRE-TERM  | 14               | 1 | 4.000                    | 4.000 | 4.000 | NA     | 4.000    | 4.000            | 4.000            |
| 3'GL | G3         | PRE-TERM  | 16               | 1 | 4.000                    | 4.000 | 4.000 | NA     | 4.000    | 4.000            | 4.000            |
| 3'GL | G3         | TERM      | 1                | 1 | 8.864                    | 8.864 | 8.864 | NA     | 8.864    | 8.864            | 8.864            |
| 3'GL | G3         | TERM      | 2                | 1 | 4.000                    | 4.000 | 4.000 | NA     | 4.000    | 4.000            | 4.000            |
| 3'GL | G3         | TERM      | 3                | 1 | 4.000                    | 4.000 | 4.000 | NA     | 4.000    | 4.000            | 4.000            |
| 3'GL | G3         | TERM      | 4                | 1 | 4.000                    | 4.000 | 4.000 | NA     | 4.000    | 4.000            | 4.000            |
| 3'GL | G3         | TERM      | 5                | 1 | 4.000                    | 4.000 | 4.000 | NA     | 4.000    | 4.000            | 4.000            |
| 3'GL | G3         | TERM      | 6                | 1 | 4.000                    | 4.000 | 4.000 | NA     | 4.000    | 4.000            | 4.000            |
| 3'GL | G3         | TERM      | 7                | 1 | 4.000                    | 4.000 | 4.000 | NA     | 4.000    | 4.000            | 4.000            |
| 3'GL | G3         | TERM      | 8                | 1 | 4.000                    | 4.000 | 4.000 | NA     | 4.000    | 4.000            | 4.000            |
| 3'GL | G4         | TERM      | 1                | 1 | 32.97                    | 32.97 | 32.97 | NA     | 32.97    | 32.97            | 32.97            |
| 3'GL | G4         | TERM      | 2                | 1 | 19.72                    | 19.72 | 19.72 | NA     | 19.72    | 19.72            | 19.72            |
| 3'GL | G4         | TERM      | 3                | 1 | 10.00                    | 10.00 | 10.00 | NA     | 10.00    | 10.00            | 10.00            |
| 3'GL | G4         | TERM      | 4                | 1 | 8.499                    | 8.499 | 8.499 | NA     | 8.499    | 8.499            | 8.499            |
| 3'GL | G4         | TERM      | 5                | 1 | 4.000                    | 4.000 | 4.000 | NA     | 4.000    | 4.000            | 4.000            |
| 3'GL | G4         | TERM      | 6                | 1 | 8.446                    | 8.446 | 8.446 | NA     | 8.446    | 8.446            | 8.446            |
| 3'GL | G4         | TERM      | 7                | 1 | 4.000                    | 4.000 | 4.000 | NA     | 4.000    | 4.000            | 4.000            |
| 3'GL | G4         | TERM      | 8                | 1 | 4.000                    | 4.000 | 4.000 | NA     | 4.000    | 4.000            | 4.000            |

**Table S2 Concentration of Human Milk Oligosaccharides in Term or Preterm Milk At Different Weeks Postpartum Separated By Milk Group**

*\* When there are results below the method limit of quantification (LoQ) the result has been assigned value of  $0.5 \times \text{LoQ}$ , hence the minimum value appears to be the same in many cases. When a large number of datapoints are below LoQ this can also have the effect that the median = minimum.*

| HMO  | Milk Group | Study Arm | Week Post Partum | N  | HMO Concentration (mg/L) |       |       |       |          |                  |                  |
|------|------------|-----------|------------------|----|--------------------------|-------|-------|-------|----------|------------------|------------------|
|      |            |           |                  |    | min *                    | max   | mean  | sd    | median * | Quartile 1 (25%) | Quartile 3 (75%) |
| 3'SL | G1         | PRE-TERM  | 1                | 19 | 154.6                    | 513.3 | 230.8 | 82.50 | 217.5    | 189.7            | 233.7            |
| 3'SL | G1         | PRE-TERM  | 2                | 19 | 117.4                    | 329.8 | 192.1 | 59.45 | 180.4    | 150.4            | 221.5            |
| 3'SL | G1         | PRE-TERM  | 3                | 19 | 107.7                    | 430.3 | 195.7 | 74.66 | 175.1    | 163.0            | 239.9            |
| 3'SL | G1         | PRE-TERM  | 4                | 18 | 98.75                    | 439.9 | 196.4 | 78.56 | 186.8    | 155.0            | 216.4            |
| 3'SL | G1         | PRE-TERM  | 5                | 19 | 103.5                    | 455.8 | 198.9 | 81.49 | 188.2    | 159.1            | 226.9            |
| 3'SL | G1         | PRE-TERM  | 6                | 18 | 85.96                    | 344.4 | 190.9 | 74.26 | 181.7    | 126.0            | 239.1            |
| 3'SL | G1         | PRE-TERM  | 7                | 18 | 91.34                    | 333.8 | 186.4 | 73.17 | 173.7    | 117.0            | 231.1            |
| 3'SL | G1         | PRE-TERM  | 8                | 18 | 91.08                    | 438.1 | 194.7 | 98.93 | 173.5    | 133.2            | 212.8            |
| 3'SL | G1         | PRE-TERM  | 10               | 18 | 88.38                    | 403.2 | 185.3 | 79.70 | 159.8    | 145.6            | 210.0            |
| 3'SL | G1         | PRE-TERM  | 12               | 15 | 93.94                    | 382.6 | 200.6 | 82.28 | 177.2    | 149.8            | 247.5            |
| 3'SL | G1         | PRE-TERM  | 14               | 15 | 82.71                    | 291.3 | 172.9 | 68.42 | 160.6    | 120.6            | 236.9            |
| 3'SL | G1         | PRE-TERM  | 16               | 15 | 93.80                    | 325.0 | 186.6 | 78.65 | 165.2    | 120.5            | 253.0            |
| 3'SL | G1         | TERM      | 1                | 21 | 119.6                    | 354.4 | 226.7 | 70.78 | 230.8    | 181.9            | 279.2            |
| 3'SL | G1         | TERM      | 2                | 19 | 94.16                    | 280.3 | 150.0 | 41.99 | 146.2    | 122.2            | 169.1            |
| 3'SL | G1         | TERM      | 3                | 21 | 78.49                    | 282.3 | 138.5 | 43.69 | 138.8    | 114.0            | 157.0            |
| 3'SL | G1         | TERM      | 4                | 21 | 77.94                    | 272.4 | 136.4 | 42.94 | 134.0    | 105.6            | 153.8            |
| 3'SL | G1         | TERM      | 5                | 21 | 82.07                    | 274.9 | 131.9 | 44.68 | 121.8    | 105.7            | 149.2            |
| 3'SL | G1         | TERM      | 6                | 20 | 72.18                    | 303.0 | 135.2 | 50.07 | 123.0    | 104.1            | 156.7            |
| 3'SL | G1         | TERM      | 7                | 20 | 74.58                    | 240.1 | 129.8 | 41.48 | 127.5    | 99.13            | 153.8            |
| 3'SL | G1         | TERM      | 8                | 21 | 50.25                    | 236.8 | 122.8 | 41.97 | 115.8    | 93.96            | 143.8            |
| 3'SL | G2         | PRE-TERM  | 1                | 5  | 215.7                    | 419.1 | 282.7 | 80.34 | 272.6    | 232.2            | 274.1            |
| 3'SL | G2         | PRE-TERM  | 2                | 5  | 161.1                    | 257.5 | 217.3 | 42.73 | 228.2    | 185.3            | 254.5            |
| 3'SL | G2         | PRE-TERM  | 3                | 5  | 151.7                    | 223.3 | 196.8 | 29.02 | 196.6    | 191.1            | 221.3            |
| 3'SL | G2         | PRE-TERM  | 4                | 5  | 129.5                    | 284.0 | 190.2 | 66.29 | 178.0    | 131.1            | 228.3            |
| 3'SL | G2         | PRE-TERM  | 5                | 5  | 129.1                    | 311.3 | 180.8 | 75.02 | 164.7    | 132.6            | 166.0            |
| 3'SL | G2         | PRE-TERM  | 6                | 5  | 120.4                    | 240.4 | 170.6 | 49.78 | 154.2    | 135.4            | 202.4            |
| 3'SL | G2         | PRE-TERM  | 7                | 5  | 115.6                    | 362.9 | 181.4 | 105.6 | 122.5    | 119.6            | 186.3            |
| 3'SL | G2         | PRE-TERM  | 8                | 5  | 92.00                    | 342.8 | 160.8 | 103.5 | 119.4    | 105.8            | 143.9            |
| 3'SL | G2         | PRE-TERM  | 10               | 4  | 97.27                    | 162.9 | 124.7 | 28.07 | 119.3    | 108.7            | 135.3            |
| 3'SL | G2         | PRE-TERM  | 12               | 5  | 92.61                    | 212.0 | 138.4 | 46.15 | 132.8    | 108.4            | 146.4            |
| 3'SL | G2         | PRE-TERM  | 14               | 5  | 83.76                    | 239.2 | 143.7 | 63.81 | 146.0    | 86.95            | 162.4            |
| 3'SL | G2         | PRE-TERM  | 16               | 3  | 86.41                    | 179.1 | 137.2 | 46.98 | 145.9    | 116.2            | 162.5            |
| 3'SL | G2         | TERM      | 1                | 5  | 105.2                    | 380.6 | 215.0 | 103.4 | 197.0    | 162.7            | 229.6            |
| 3'SL | G2         | TERM      | 2                | 5  | 89.66                    | 160.1 | 122.4 | 28.19 | 125.3    | 100.4            | 136.3            |

**Table S2 Concentration of Human Milk Oligosaccharides in Term or Preterm Milk At Different Weeks Postpartum Separated By Milk Group**

\* When there are results below the method limit of quantification (LoQ) the result has been assigned value of  $0.5 \times \text{LoQ}$ , hence the minimum value appears to be the same in many cases. When a large number of datapoints are below LoQ this can also have the effect that the median = minimum.

| HMO  | Milk Group | Study Arm | Week Post Partum | N | HMO Concentration (mg/L) |       |       |       |          |                  |                  |
|------|------------|-----------|------------------|---|--------------------------|-------|-------|-------|----------|------------------|------------------|
|      |            |           |                  |   | min *                    | max   | mean  | sd    | median * | Quartile 1 (25%) | Quartile 3 (75%) |
| 3'SL | G2         | TERM      | 3                | 5 | 94.04                    | 136.4 | 114.3 | 18.84 | 118.5    | 95.72            | 126.8            |
| 3'SL | G2         | TERM      | 4                | 5 | 96.47                    | 136.6 | 116.2 | 18.31 | 116.6    | 99.32            | 132.1            |
| 3'SL | G2         | TERM      | 5                | 5 | 92.27                    | 140.4 | 112.8 | 19.78 | 103.5    | 101.7            | 126.0            |
| 3'SL | G2         | TERM      | 6                | 5 | 35.33                    | 163.0 | 107.3 | 48.00 | 111.0    | 93.14            | 134.1            |
| 3'SL | G2         | TERM      | 7                | 5 | 74.78                    | 122.0 | 98.92 | 18.14 | 102.7    | 87.95            | 107.1            |
| 3'SL | G2         | TERM      | 8                | 5 | 77.15                    | 131.7 | 103.5 | 22.91 | 97.29    | 88.86            | 122.5            |
| 3'SL | G3         | PRE-TERM  | 1                | 1 | 174.7                    | 174.7 | 174.7 | NA    | 174.7    | 174.7            | 174.7            |
| 3'SL | G3         | PRE-TERM  | 2                | 1 | 218.9                    | 218.9 | 218.9 | NA    | 218.9    | 218.9            | 218.9            |
| 3'SL | G3         | PRE-TERM  | 3                | 1 | 209.5                    | 209.5 | 209.5 | NA    | 209.5    | 209.5            | 209.5            |
| 3'SL | G3         | PRE-TERM  | 4                | 1 | 155.9                    | 155.9 | 155.9 | NA    | 155.9    | 155.9            | 155.9            |
| 3'SL | G3         | PRE-TERM  | 5                | 1 | 177.6                    | 177.6 | 177.6 | NA    | 177.6    | 177.6            | 177.6            |
| 3'SL | G3         | PRE-TERM  | 6                | 1 | 176.5                    | 176.5 | 176.5 | NA    | 176.5    | 176.5            | 176.5            |
| 3'SL | G3         | PRE-TERM  | 7                | 1 | 124.4                    | 124.4 | 124.4 | NA    | 124.4    | 124.4            | 124.4            |
| 3'SL | G3         | PRE-TERM  | 8                | 1 | 132.0                    | 132.0 | 132.0 | NA    | 132.0    | 132.0            | 132.0            |
| 3'SL | G3         | PRE-TERM  | 10               | 1 | 117.7                    | 117.7 | 117.7 | NA    | 117.7    | 117.7            | 117.7            |
| 3'SL | G3         | PRE-TERM  | 12               | 1 | 123.5                    | 123.5 | 123.5 | NA    | 123.5    | 123.5            | 123.5            |
| 3'SL | G3         | PRE-TERM  | 14               | 1 | 128.8                    | 128.8 | 128.8 | NA    | 128.8    | 128.8            | 128.8            |
| 3'SL | G3         | PRE-TERM  | 16               | 1 | 131.0                    | 131.0 | 131.0 | NA    | 131.0    | 131.0            | 131.0            |
| 3'SL | G3         | TERM      | 1                | 1 | 154.8                    | 154.8 | 154.8 | NA    | 154.8    | 154.8            | 154.8            |
| 3'SL | G3         | TERM      | 2                | 1 | 152.1                    | 152.1 | 152.1 | NA    | 152.1    | 152.1            | 152.1            |
| 3'SL | G3         | TERM      | 3                | 1 | 149.3                    | 149.3 | 149.3 | NA    | 149.3    | 149.3            | 149.3            |
| 3'SL | G3         | TERM      | 4                | 1 | 153.6                    | 153.6 | 153.6 | NA    | 153.6    | 153.6            | 153.6            |
| 3'SL | G3         | TERM      | 5                | 1 | 140.2                    | 140.2 | 140.2 | NA    | 140.2    | 140.2            | 140.2            |
| 3'SL | G3         | TERM      | 6                | 1 | 135.1                    | 135.1 | 135.1 | NA    | 135.1    | 135.1            | 135.1            |
| 3'SL | G3         | TERM      | 7                | 1 | 138.1                    | 138.1 | 138.1 | NA    | 138.1    | 138.1            | 138.1            |
| 3'SL | G3         | TERM      | 8                | 1 | 140.2                    | 140.2 | 140.2 | NA    | 140.2    | 140.2            | 140.2            |
| 3'SL | G4         | TERM      | 1                | 1 | 241.3                    | 241.3 | 241.3 | NA    | 241.3    | 241.3            | 241.3            |
| 3'SL | G4         | TERM      | 2                | 1 | 206.5                    | 206.5 | 206.5 | NA    | 206.5    | 206.5            | 206.5            |
| 3'SL | G4         | TERM      | 3                | 1 | 162.2                    | 162.2 | 162.2 | NA    | 162.2    | 162.2            | 162.2            |
| 3'SL | G4         | TERM      | 4                | 1 | 155.5                    | 155.5 | 155.5 | NA    | 155.5    | 155.5            | 155.5            |
| 3'SL | G4         | TERM      | 5                | 1 | 140.1                    | 140.1 | 140.1 | NA    | 140.1    | 140.1            | 140.1            |
| 3'SL | G4         | TERM      | 6                | 1 | 152.2                    | 152.2 | 152.2 | NA    | 152.2    | 152.2            | 152.2            |
| 3'SL | G4         | TERM      | 7                | 1 | 119.8                    | 119.8 | 119.8 | NA    | 119.8    | 119.8            | 119.8            |
| 3'SL | G4         | TERM      | 8                | 1 | 111.7                    | 111.7 | 111.7 | NA    | 111.7    | 111.7            | 111.7            |

**Table S2 Concentration of Human Milk Oligosaccharides in Term or Preterm Milk At Different Weeks Postpartum Separated By Milk Group**

\* When there are results below the method limit of quantification (LoQ) the result has been assigned value of  $0.5 \times \text{LoQ}$ , hence the minimum value appears to be the same in many cases. When a large number of datapoints are below LoQ this can also have the effect that the median = minimum.

| HMO | Milk Group | Study Arm | Week Post Partum | N  | HMO Concentration (mg/L) |       |       |       |          |                  |                  |
|-----|------------|-----------|------------------|----|--------------------------|-------|-------|-------|----------|------------------|------------------|
|     |            |           |                  |    | min *                    | max   | mean  | sd    | median * | Quartile 1 (25%) | Quartile 3 (75%) |
| 3FL | G1         | PRE-TERM  | 1                | 19 | 112.2                    | 844.2 | 293.9 | 172.1 | 239.0    | 184.9            | 348.7            |
| 3FL | G1         | PRE-TERM  | 2                | 19 | 154.5                    | 978.0 | 330.4 | 186.5 | 271.8    | 238.3            | 351.9            |
| 3FL | G1         | PRE-TERM  | 3                | 19 | 182.1                    | 1087  | 419.7 | 206.8 | 392.0    | 301.6            | 501.6            |
| 3FL | G1         | PRE-TERM  | 4                | 18 | 205.2                    | 1262  | 491.0 | 236.3 | 460.3    | 366.9            | 556.6            |
| 3FL | G1         | PRE-TERM  | 5                | 19 | 220.2                    | 1264  | 569.2 | 253.5 | 504.9    | 418.9            | 683.4            |
| 3FL | G1         | PRE-TERM  | 6                | 18 | 75.94                    | 1201  | 564.9 | 271.1 | 512.7    | 459.0            | 654.3            |
| 3FL | G1         | PRE-TERM  | 7                | 18 | 232.4                    | 1242  | 622.0 | 239.9 | 558.6    | 503.4            | 757.6            |
| 3FL | G1         | PRE-TERM  | 8                | 18 | 270.0                    | 1356  | 665.8 | 246.7 | 640.1    | 543.6            | 750.1            |
| 3FL | G1         | PRE-TERM  | 10               | 18 | 356.0                    | 1550  | 702.2 | 287.6 | 678.7    | 501.8            | 864.7            |
| 3FL | G1         | PRE-TERM  | 12               | 15 | 492.5                    | 1504  | 853.5 | 271.7 | 790.3    | 673.8            | 1009             |
| 3FL | G1         | PRE-TERM  | 14               | 15 | 488.0                    | 1914  | 889.4 | 376.6 | 740.6    | 643.2            | 1132             |
| 3FL | G1         | PRE-TERM  | 16               | 15 | 435.5                    | 2188  | 954.0 | 435.0 | 941.1    | 650.1            | 1114             |
| 3FL | G1         | TERM      | 1                | 21 | 119.4                    | 447.8 | 212.4 | 85.81 | 180.2    | 159.4            | 253.9            |
| 3FL | G1         | TERM      | 2                | 19 | 145.3                    | 662.5 | 300.1 | 129.6 | 273.5    | 199.0            | 383.4            |
| 3FL | G1         | TERM      | 3                | 21 | 178.3                    | 706.0 | 351.4 | 139.5 | 342.3    | 233.7            | 428.1            |
| 3FL | G1         | TERM      | 4                | 21 | 200.0                    | 690.4 | 401.5 | 161.3 | 380.1    | 263.0            | 528.0            |
| 3FL | G1         | TERM      | 5                | 21 | 236.2                    | 849.6 | 474.9 | 167.3 | 431.5    | 363.2            | 564.4            |
| 3FL | G1         | TERM      | 6                | 20 | 287.4                    | 1114  | 561.1 | 210.7 | 492.0    | 433.2            | 667.9            |
| 3FL | G1         | TERM      | 7                | 20 | 242.1                    | 1222  | 587.3 | 274.6 | 525.9    | 451.7            | 579.5            |
| 3FL | G1         | TERM      | 8                | 21 | 151.0                    | 1231  | 582.7 | 276.4 | 527.3    | 435.6            | 688.7            |
| 3FL | G2         | PRE-TERM  | 1                | 5  | 908.2                    | 1472  | 1176  | 208.3 | 1176     | 1078             | 1246             |
| 3FL | G2         | PRE-TERM  | 2                | 5  | 991.9                    | 1367  | 1111  | 151.9 | 1050     | 1019             | 1124             |
| 3FL | G2         | PRE-TERM  | 3                | 5  | 1041                     | 1359  | 1198  | 125.9 | 1165     | 1137             | 1287             |
| 3FL | G2         | PRE-TERM  | 4                | 5  | 667.5                    | 1649  | 1220  | 437.2 | 1457     | 836.1            | 1488             |
| 3FL | G2         | PRE-TERM  | 5                | 5  | 829.2                    | 2284  | 1442  | 612.4 | 1549     | 856.8            | 1690             |
| 3FL | G2         | PRE-TERM  | 6                | 5  | 841.4                    | 1663  | 1234  | 396.9 | 1034     | 969.7            | 1661             |
| 3FL | G2         | PRE-TERM  | 7                | 5  | 829.5                    | 1825  | 1347  | 453.4 | 1307     | 985.7            | 1787             |
| 3FL | G2         | PRE-TERM  | 8                | 5  | 894.6                    | 2465  | 1547  | 744.3 | 1186     | 956.4            | 2231             |
| 3FL | G2         | PRE-TERM  | 10               | 4  | 958.9                    | 2821  | 1775  | 860.6 | 1659     | 1134             | 2300             |
| 3FL | G2         | PRE-TERM  | 12               | 5  | 1015                     | 3101  | 1896  | 835.0 | 2011     | 1202             | 2151             |
| 3FL | G2         | PRE-TERM  | 14               | 5  | 1158                     | 3398  | 2335  | 847.5 | 2185     | 2077             | 2855             |
| 3FL | G2         | PRE-TERM  | 16               | 3  | 1213                     | 2505  | 1687  | 711.3 | 1342     | 1278             | 1923             |
| 3FL | G2         | TERM      | 1                | 5  | 768.8                    | 1240  | 995.1 | 207.2 | 1025     | 800.0            | 1142             |
| 3FL | G2         | TERM      | 2                | 5  | 632.0                    | 1361  | 1144  | 292.0 | 1245     | 1207             | 1277             |

**Table S2 Concentration of Human Milk Oligosaccharides in Term or Preterm Milk At Different Weeks Postpartum Separated By Milk Group**

\* When there are results below the method limit of quantification (LoQ) the result has been assigned value of  $0.5 \times \text{LoQ}$ , hence the minimum value appears to be the same in many cases. When a large number of datapoints are below LoQ this can also have the effect that the median = minimum.

| HMO | Milk Group | Study Arm | Week Post Partum | N | HMO Concentration (mg/L) |       |       |       |          |                  |                  |
|-----|------------|-----------|------------------|---|--------------------------|-------|-------|-------|----------|------------------|------------------|
|     |            |           |                  |   | min *                    | max   | mean  | sd    | median * | Quartile 1 (25%) | Quartile 3 (75%) |
| 3FL | G2         | TERM      | 3                | 5 | 780.7                    | 1577  | 1202  | 293.3 | 1258     | 1089             | 1304             |
| 3FL | G2         | TERM      | 4                | 5 | 782.1                    | 1861  | 1345  | 428.6 | 1381     | 1076             | 1625             |
| 3FL | G2         | TERM      | 5                | 5 | 799.4                    | 1720  | 1390  | 430.0 | 1675     | 1062             | 1696             |
| 3FL | G2         | TERM      | 6                | 5 | 624.3                    | 1983  | 1316  | 595.5 | 1265     | 858.8            | 1848             |
| 3FL | G2         | TERM      | 7                | 5 | 686.5                    | 1978  | 1431  | 517.5 | 1460     | 1198             | 1834             |
| 3FL | G2         | TERM      | 8                | 5 | 727.3                    | 2013  | 1493  | 537.7 | 1609     | 1186             | 1931             |
| 3FL | G3         | PRE-TERM  | 1                | 1 | 64.12                    | 64.12 | 64.12 | NA    | 64.12    | 64.12            | 64.12            |
| 3FL | G3         | PRE-TERM  | 2                | 1 | 148.3                    | 148.3 | 148.3 | NA    | 148.3    | 148.3            | 148.3            |
| 3FL | G3         | PRE-TERM  | 3                | 1 | 181.0                    | 181.0 | 181.0 | NA    | 181.0    | 181.0            | 181.0            |
| 3FL | G3         | PRE-TERM  | 4                | 1 | 158.0                    | 158.0 | 158.0 | NA    | 158.0    | 158.0            | 158.0            |
| 3FL | G3         | PRE-TERM  | 5                | 1 | 215.6                    | 215.6 | 215.6 | NA    | 215.6    | 215.6            | 215.6            |
| 3FL | G3         | PRE-TERM  | 6                | 1 | 223.4                    | 223.4 | 223.4 | NA    | 223.4    | 223.4            | 223.4            |
| 3FL | G3         | PRE-TERM  | 7                | 1 | 254.0                    | 254.0 | 254.0 | NA    | 254.0    | 254.0            | 254.0            |
| 3FL | G3         | PRE-TERM  | 8                | 1 | 224.9                    | 224.9 | 224.9 | NA    | 224.9    | 224.9            | 224.9            |
| 3FL | G3         | PRE-TERM  | 10               | 1 | 241.8                    | 241.8 | 241.8 | NA    | 241.8    | 241.8            | 241.8            |
| 3FL | G3         | PRE-TERM  | 12               | 1 | 278.6                    | 278.6 | 278.6 | NA    | 278.6    | 278.6            | 278.6            |
| 3FL | G3         | PRE-TERM  | 14               | 1 | 298.6                    | 298.6 | 298.6 | NA    | 298.6    | 298.6            | 298.6            |
| 3FL | G3         | PRE-TERM  | 16               | 1 | 325.1                    | 325.1 | 325.1 | NA    | 325.1    | 325.1            | 325.1            |
| 3FL | G3         | TERM      | 1                | 1 | 39.33                    | 39.33 | 39.33 | NA    | 39.33    | 39.33            | 39.33            |
| 3FL | G3         | TERM      | 2                | 1 | 66.65                    | 66.65 | 66.65 | NA    | 66.65    | 66.65            | 66.65            |
| 3FL | G3         | TERM      | 3                | 1 | 82.63                    | 82.63 | 82.63 | NA    | 82.63    | 82.63            | 82.63            |
| 3FL | G3         | TERM      | 4                | 1 | 99.24                    | 99.24 | 99.24 | NA    | 99.24    | 99.24            | 99.24            |
| 3FL | G3         | TERM      | 5                | 1 | 95.34                    | 95.34 | 95.34 | NA    | 95.34    | 95.34            | 95.34            |
| 3FL | G3         | TERM      | 6                | 1 | 102.9                    | 102.9 | 102.9 | NA    | 102.9    | 102.9            | 102.9            |
| 3FL | G3         | TERM      | 7                | 1 | 118.2                    | 118.2 | 118.2 | NA    | 118.2    | 118.2            | 118.2            |
| 3FL | G3         | TERM      | 8                | 1 | 131.6                    | 131.6 | 131.6 | NA    | 131.6    | 131.6            | 131.6            |
| 3FL | G4         | TERM      | 1                | 1 | 224.5                    | 224.5 | 224.5 | NA    | 224.5    | 224.5            | 224.5            |
| 3FL | G4         | TERM      | 2                | 1 | 358.0                    | 358.0 | 358.0 | NA    | 358.0    | 358.0            | 358.0            |
| 3FL | G4         | TERM      | 3                | 1 | 350.3                    | 350.3 | 350.3 | NA    | 350.3    | 350.3            | 350.3            |
| 3FL | G4         | TERM      | 4                | 1 | 361.8                    | 361.8 | 361.8 | NA    | 361.8    | 361.8            | 361.8            |
| 3FL | G4         | TERM      | 5                | 1 | 390.6                    | 390.6 | 390.6 | NA    | 390.6    | 390.6            | 390.6            |
| 3FL | G4         | TERM      | 6                | 1 | 538.7                    | 538.7 | 538.7 | NA    | 538.7    | 538.7            | 538.7            |
| 3FL | G4         | TERM      | 7                | 1 | 439.5                    | 439.5 | 439.5 | NA    | 439.5    | 439.5            | 439.5            |
| 3FL | G4         | TERM      | 8                | 1 | 485.5                    | 485.5 | 485.5 | NA    | 485.5    | 485.5            | 485.5            |



**Table S2 Concentration of Human Milk Oligosaccharides in Term or Preterm Milk At Different Weeks Postpartum Separated By Milk Group**

*\* When there are results below the method limit of quantification (LoQ) the result has been assigned value of  $0.5 \times \text{LoQ}$ , hence the minimum value appears to be the same in many cases. When a large number of datapoints are below LoQ this can also have the effect that the median = minimum.*

| HMO  | Milk Group | Study Arm | Week Post Partum | N  | HMO Concentration (mg/L) |       |       |       |          |                  |                  |
|------|------------|-----------|------------------|----|--------------------------|-------|-------|-------|----------|------------------|------------------|
|      |            |           |                  |    | min *                    | max   | mean  | sd    | median * | Quartile 1 (25%) | Quartile 3 (75%) |
| 6'GL | G1         | PRE-TERM  | 1                | 19 | 40.18                    | 156.4 | 91.62 | 30.21 | 92.10    | 76.37            | 105.7            |
| 6'GL | G1         | PRE-TERM  | 2                | 19 | 25.16                    | 80.30 | 45.71 | 16.10 | 41.32    | 35.50            | 51.31            |
| 6'GL | G1         | PRE-TERM  | 3                | 19 | 16.66                    | 61.99 | 35.28 | 12.68 | 33.17    | 25.69            | 43.26            |
| 6'GL | G1         | PRE-TERM  | 4                | 18 | 18.78                    | 57.48 | 32.05 | 11.80 | 29.92    | 22.39            | 41.33            |
| 6'GL | G1         | PRE-TERM  | 5                | 19 | 16.16                    | 96.94 | 30.58 | 18.51 | 27.70    | 20.08            | 30.26            |
| 6'GL | G1         | PRE-TERM  | 6                | 18 | 11.89                    | 179.6 | 35.03 | 37.45 | 25.25    | 20.64            | 33.47            |
| 6'GL | G1         | PRE-TERM  | 7                | 18 | 11.33                    | 43.71 | 24.22 | 10.07 | 23.07    | 15.36            | 30.60            |
| 6'GL | G1         | PRE-TERM  | 8                | 18 | 7.746                    | 59.26 | 23.64 | 12.27 | 19.45    | 15.34            | 29.17            |
| 6'GL | G1         | PRE-TERM  | 10               | 18 | 9.255                    | 48.40 | 20.48 | 9.770 | 18.33    | 13.65            | 22.95            |
| 6'GL | G1         | PRE-TERM  | 12               | 15 | 6.997                    | 44.84 | 21.02 | 10.28 | 16.48    | 13.94            | 27.13            |
| 6'GL | G1         | PRE-TERM  | 14               | 15 | 8.465                    | 52.92 | 18.13 | 10.94 | 14.18    | 12.57            | 20.85            |
| 6'GL | G1         | PRE-TERM  | 16               | 15 | 3.150                    | 46.05 | 16.74 | 10.32 | 12.52    | 11.41            | 21.14            |
| 6'GL | G1         | TERM      | 1                | 21 | 53.98                    | 234.0 | 122.4 | 50.11 | 108.2    | 92.85            | 136.6            |
| 6'GL | G1         | TERM      | 2                | 19 | 12.64                    | 94.87 | 51.33 | 20.64 | 46.00    | 37.87            | 66.80            |
| 6'GL | G1         | TERM      | 3                | 21 | 8.541                    | 59.24 | 36.10 | 13.28 | 33.61    | 29.14            | 44.54            |
| 6'GL | G1         | TERM      | 4                | 21 | 7.969                    | 59.96 | 29.09 | 12.14 | 26.92    | 20.71            | 37.78            |
| 6'GL | G1         | TERM      | 5                | 21 | 3.150                    | 68.27 | 24.59 | 14.08 | 20.87    | 17.35            | 29.23            |
| 6'GL | G1         | TERM      | 6                | 20 | 3.150                    | 39.70 | 20.62 | 8.062 | 19.16    | 15.38            | 26.30            |
| 6'GL | G1         | TERM      | 7                | 20 | 3.150                    | 38.09 | 19.52 | 9.131 | 19.71    | 14.24            | 25.38            |
| 6'GL | G1         | TERM      | 8                | 21 | 3.150                    | 47.47 | 18.60 | 11.93 | 14.54    | 10.52            | 23.25            |
| 6'GL | G2         | PRE-TERM  | 1                | 5  | 39.10                    | 94.25 | 65.73 | 21.03 | 64.95    | 54.12            | 76.24            |
| 6'GL | G2         | PRE-TERM  | 2                | 5  | 17.55                    | 38.87 | 30.39 | 8.054 | 31.35    | 29.26            | 34.93            |
| 6'GL | G2         | PRE-TERM  | 3                | 5  | 16.82                    | 39.49 | 28.42 | 8.448 | 27.06    | 25.85            | 32.89            |
| 6'GL | G2         | PRE-TERM  | 4                | 5  | 18.30                    | 26.36 | 21.88 | 3.388 | 21.92    | 18.91            | 23.91            |
| 6'GL | G2         | PRE-TERM  | 5                | 5  | 21.56                    | 38.77 | 26.96 | 6.792 | 25.00    | 23.70            | 25.75            |
| 6'GL | G2         | PRE-TERM  | 6                | 5  | 3.150                    | 29.68 | 19.97 | 10.47 | 23.56    | 17.12            | 26.32            |
| 6'GL | G2         | PRE-TERM  | 7                | 5  | 12.88                    | 25.95 | 17.58 | 5.015 | 16.62    | 14.82            | 17.65            |
| 6'GL | G2         | PRE-TERM  | 8                | 5  | 9.818                    | 25.22 | 17.96 | 6.612 | 18.51    | 12.86            | 23.40            |
| 6'GL | G2         | PRE-TERM  | 10               | 4  | 13.41                    | 28.95 | 19.32 | 7.110 | 17.47    | 14.26            | 22.53            |
| 6'GL | G2         | PRE-TERM  | 12               | 5  | 10.43                    | 24.69 | 17.87 | 5.120 | 17.62    | 17.17            | 19.42            |
| 6'GL | G2         | PRE-TERM  | 14               | 5  | 13.05                    | 32.99 | 22.95 | 8.405 | 25.56    | 15.52            | 27.62            |
| 6'GL | G2         | PRE-TERM  | 16               | 3  | 14.07                    | 19.16 | 16.37 | 2.581 | 15.88    | 14.98            | 17.52            |
| 6'GL | G2         | TERM      | 1                | 5  | 122.7                    | 175.0 | 146.7 | 22.98 | 134.4    | 134.2            | 167.4            |
| 6'GL | G2         | TERM      | 2                | 5  | 28.62                    | 76.66 | 53.16 | 17.48 | 52.93    | 48.00            | 59.61            |

**Table S2 Concentration of Human Milk Oligosaccharides in Term or Preterm Milk At Different Weeks Postpartum Separated By Milk Group**

*\* When there are results below the method limit of quantification (LoQ) the result has been assigned value of  $0.5 \times \text{LoQ}$ , hence the minimum value appears to be the same in many cases. When a large number of datapoints are below LoQ this can also have the effect that the median = minimum.*

| HMO  | Milk Group | Study Arm | Week<br>Post Partum | N | HMO Concentration (mg/L) |       |       |       |          |                     |                     |
|------|------------|-----------|---------------------|---|--------------------------|-------|-------|-------|----------|---------------------|---------------------|
|      |            |           |                     |   | min *                    | max   | mean  | sd    | median * | Quartile 1<br>(25%) | Quartile 3<br>(75%) |
| 6'GL | G2         | TERM      | 3                   | 5 | 15.76                    | 52.37 | 34.13 | 12.99 | 34.39    | 32.59               | 35.52               |
| 6'GL | G2         | TERM      | 4                   | 5 | 3.150                    | 27.99 | 14.69 | 12.29 | 12.07    | 3.150               | 27.10               |
| 6'GL | G2         | TERM      | 5                   | 5 | 3.150                    | 39.74 | 17.64 | 15.30 | 19.70    | 3.150               | 22.47               |
| 6'GL | G2         | TERM      | 6                   | 5 | 6.478                    | 20.80 | 13.16 | 6.216 | 12.30    | 8.078               | 18.16               |
| 6'GL | G2         | TERM      | 7                   | 5 | 6.983                    | 22.00 | 15.27 | 5.498 | 16.67    | 13.79               | 16.93               |
| 6'GL | G2         | TERM      | 8                   | 5 | 6.629                    | 20.67 | 14.34 | 5.059 | 14.56    | 13.89               | 15.93               |
| 6'GL | G3         | PRE-TERM  | 1                   | 1 | 99.02                    | 99.02 | 99.02 | NA    | 99.02    | 99.02               | 99.02               |
| 6'GL | G3         | PRE-TERM  | 2                   | 1 | 51.62                    | 51.62 | 51.62 | NA    | 51.62    | 51.62               | 51.62               |
| 6'GL | G3         | PRE-TERM  | 3                   | 1 | 34.12                    | 34.12 | 34.12 | NA    | 34.12    | 34.12               | 34.12               |
| 6'GL | G3         | PRE-TERM  | 4                   | 1 | 28.35                    | 28.35 | 28.35 | NA    | 28.35    | 28.35               | 28.35               |
| 6'GL | G3         | PRE-TERM  | 5                   | 1 | 30.35                    | 30.35 | 30.35 | NA    | 30.35    | 30.35               | 30.35               |
| 6'GL | G3         | PRE-TERM  | 6                   | 1 | 30.43                    | 30.43 | 30.43 | NA    | 30.43    | 30.43               | 30.43               |
| 6'GL | G3         | PRE-TERM  | 7                   | 1 | 16.02                    | 16.02 | 16.02 | NA    | 16.02    | 16.02               | 16.02               |
| 6'GL | G3         | PRE-TERM  | 8                   | 1 | 18.65                    | 18.65 | 18.65 | NA    | 18.65    | 18.65               | 18.65               |
| 6'GL | G3         | PRE-TERM  | 10                  | 1 | 14.55                    | 14.55 | 14.55 | NA    | 14.55    | 14.55               | 14.55               |
| 6'GL | G3         | PRE-TERM  | 12                  | 1 | 13.66                    | 13.66 | 13.66 | NA    | 13.66    | 13.66               | 13.66               |
| 6'GL | G3         | PRE-TERM  | 14                  | 1 | 14.69                    | 14.69 | 14.69 | NA    | 14.69    | 14.69               | 14.69               |
| 6'GL | G3         | PRE-TERM  | 16                  | 1 | 12.31                    | 12.31 | 12.31 | NA    | 12.31    | 12.31               | 12.31               |
| 6'GL | G3         | TERM      | 1                   | 1 | 109.9                    | 109.9 | 109.9 | NA    | 109.9    | 109.9               | 109.9               |
| 6'GL | G3         | TERM      | 2                   | 1 | 50.71                    | 50.71 | 50.71 | NA    | 50.71    | 50.71               | 50.71               |
| 6'GL | G3         | TERM      | 3                   | 1 | 38.43                    | 38.43 | 38.43 | NA    | 38.43    | 38.43               | 38.43               |
| 6'GL | G3         | TERM      | 4                   | 1 | 31.73                    | 31.73 | 31.73 | NA    | 31.73    | 31.73               | 31.73               |
| 6'GL | G3         | TERM      | 5                   | 1 | 21.24                    | 21.24 | 21.24 | NA    | 21.24    | 21.24               | 21.24               |
| 6'GL | G3         | TERM      | 6                   | 1 | 16.32                    | 16.32 | 16.32 | NA    | 16.32    | 16.32               | 16.32               |
| 6'GL | G3         | TERM      | 7                   | 1 | 15.03                    | 15.03 | 15.03 | NA    | 15.03    | 15.03               | 15.03               |
| 6'GL | G3         | TERM      | 8                   | 1 | 12.89                    | 12.89 | 12.89 | NA    | 12.89    | 12.89               | 12.89               |
| 6'GL | G4         | TERM      | 1                   | 1 | 176.0                    | 176.0 | 176.0 | NA    | 176.0    | 176.0               | 176.0               |
| 6'GL | G4         | TERM      | 2                   | 1 | 92.67                    | 92.67 | 92.67 | NA    | 92.67    | 92.67               | 92.67               |
| 6'GL | G4         | TERM      | 3                   | 1 | 51.40                    | 51.40 | 51.40 | NA    | 51.40    | 51.40               | 51.40               |
| 6'GL | G4         | TERM      | 4                   | 1 | 39.76                    | 39.76 | 39.76 | NA    | 39.76    | 39.76               | 39.76               |
| 6'GL | G4         | TERM      | 5                   | 1 | 30.64                    | 30.64 | 30.64 | NA    | 30.64    | 30.64               | 30.64               |
| 6'GL | G4         | TERM      | 6                   | 1 | 39.81                    | 39.81 | 39.81 | NA    | 39.81    | 39.81               | 39.81               |
| 6'GL | G4         | TERM      | 7                   | 1 | 24.24                    | 24.24 | 24.24 | NA    | 24.24    | 24.24               | 24.24               |
| 6'GL | G4         | TERM      | 8                   | 1 | 20.55                    | 20.55 | 20.55 | NA    | 20.55    | 20.55               | 20.55               |

**Table S2 Concentration of Human Milk Oligosaccharides in Term or Preterm Milk At Different Weeks Postpartum Separated By Milk Group**

\* When there are results below the method limit of quantification (LoQ) the result has been assigned value of  $0.5 \times \text{LoQ}$ , hence the minimum value appears to be the same in many cases. When a large number of datapoints are below LoQ this can also have the effect that the median = minimum.

| HMO  | Milk Group | Study Arm | Week Post Partum | N  | HMO Concentration (mg/L) |       |       |       |          |                  |                  |
|------|------------|-----------|------------------|----|--------------------------|-------|-------|-------|----------|------------------|------------------|
|      |            |           |                  |    | min *                    | max   | mean  | sd    | median * | Quartile 1 (25%) | Quartile 3 (75%) |
| 6'SL | G1         | PRE-TERM  | 1                | 19 | 103.1                    | 1132  | 524.0 | 269.7 | 555.8    | 310.6            | 656.5            |
| 6'SL | G1         | PRE-TERM  | 2                | 19 | 63.98                    | 1135  | 548.8 | 289.4 | 582.9    | 323.2            | 751.2            |
| 6'SL | G1         | PRE-TERM  | 3                | 19 | 74.88                    | 926.1 | 493.7 | 234.8 | 517.0    | 347.5            | 653.4            |
| 6'SL | G1         | PRE-TERM  | 4                | 18 | 61.36                    | 705.7 | 437.0 | 169.0 | 471.4    | 344.0            | 540.3            |
| 6'SL | G1         | PRE-TERM  | 5                | 19 | 74.89                    | 569.3 | 344.5 | 144.0 | 382.5    | 223.1            | 442.7            |
| 6'SL | G1         | PRE-TERM  | 6                | 18 | 10.00                    | 534.3 | 309.5 | 145.0 | 340.7    | 190.1            | 406.5            |
| 6'SL | G1         | PRE-TERM  | 7                | 18 | 135.1                    | 524.7 | 264.3 | 118.3 | 276.6    | 151.6            | 328.6            |
| 6'SL | G1         | PRE-TERM  | 8                | 18 | 116.1                    | 476.6 | 245.6 | 105.8 | 235.2    | 154.6            | 293.9            |
| 6'SL | G1         | PRE-TERM  | 10               | 18 | 100.6                    | 309.4 | 178.8 | 66.34 | 161.4    | 130.4            | 192.1            |
| 6'SL | G1         | PRE-TERM  | 12               | 15 | 84.36                    | 256.2 | 152.0 | 47.93 | 150.6    | 117.4            | 185.1            |
| 6'SL | G1         | PRE-TERM  | 14               | 15 | 61.11                    | 212.2 | 117.2 | 43.77 | 101.1    | 86.36            | 146.5            |
| 6'SL | G1         | PRE-TERM  | 16               | 15 | 46.43                    | 196.6 | 98.58 | 47.51 | 85.22    | 60.33            | 129.2            |
| 6'SL | G1         | TERM      | 1                | 21 | 222.0                    | 794.7 | 501.0 | 144.5 | 497.2    | 428.5            | 567.1            |
| 6'SL | G1         | TERM      | 2                | 19 | 363.7                    | 1084  | 658.6 | 188.6 | 626.3    | 534.1            | 781.7            |
| 6'SL | G1         | TERM      | 3                | 21 | 325.3                    | 985.4 | 585.9 | 182.9 | 531.3    | 441.9            | 754.7            |
| 6'SL | G1         | TERM      | 4                | 21 | 216.1                    | 797.3 | 493.4 | 162.0 | 443.0    | 383.7            | 568.0            |
| 6'SL | G1         | TERM      | 5                | 21 | 24.60                    | 693.3 | 363.1 | 160.9 | 341.6    | 309.8            | 428.5            |
| 6'SL | G1         | TERM      | 6                | 20 | 153.7                    | 700.9 | 332.5 | 142.1 | 315.8    | 234.5            | 400.8            |
| 6'SL | G1         | TERM      | 7                | 20 | 101.5                    | 662.3 | 281.1 | 145.5 | 250.9    | 180.3            | 352.0            |
| 6'SL | G1         | TERM      | 8                | 21 | 53.06                    | 671.2 | 238.3 | 149.1 | 195.5    | 145.8            | 301.0            |
| 6'SL | G2         | PRE-TERM  | 1                | 5  | 145.3                    | 501.0 | 334.9 | 146.2 | 303.3    | 263.9            | 461.0            |
| 6'SL | G2         | PRE-TERM  | 2                | 5  | 86.13                    | 559.2 | 311.1 | 175.2 | 318.4    | 224.7            | 367.0            |
| 6'SL | G2         | PRE-TERM  | 3                | 5  | 61.39                    | 555.9 | 311.0 | 175.2 | 309.8    | 299.8            | 328.2            |
| 6'SL | G2         | PRE-TERM  | 4                | 5  | 53.89                    | 467.7 | 260.4 | 148.6 | 249.1    | 230.5            | 301.0            |
| 6'SL | G2         | PRE-TERM  | 5                | 5  | 74.89                    | 331.6 | 238.4 | 103.2 | 264.0    | 208.2            | 313.4            |
| 6'SL | G2         | PRE-TERM  | 6                | 5  | 74.47                    | 353.9 | 238.4 | 112.0 | 247.0    | 191.0            | 325.7            |
| 6'SL | G2         | PRE-TERM  | 7                | 5  | 55.02                    | 354.5 | 210.4 | 117.5 | 177.8    | 168.0            | 296.6            |
| 6'SL | G2         | PRE-TERM  | 8                | 5  | 57.52                    | 315.4 | 173.9 | 95.55 | 146.4    | 142.1            | 208.3            |
| 6'SL | G2         | PRE-TERM  | 10               | 4  | 100.6                    | 249.2 | 173.1 | 60.68 | 171.2    | 153.5            | 190.8            |
| 6'SL | G2         | PRE-TERM  | 12               | 5  | 65.69                    | 202.3 | 132.1 | 50.86 | 122.1    | 114.2            | 156.3            |
| 6'SL | G2         | PRE-TERM  | 14               | 5  | 69.80                    | 158.9 | 105.2 | 43.22 | 77.58    | 74.24            | 145.4            |
| 6'SL | G2         | PRE-TERM  | 16               | 3  | 109.5                    | 135.2 | 123.6 | 13.05 | 126.1    | 117.8            | 130.7            |
| 6'SL | G2         | TERM      | 1                | 5  | 295.7                    | 634.7 | 465.0 | 152.7 | 401.4    | 374.6            | 618.4            |
| 6'SL | G2         | TERM      | 2                | 5  | 311.3                    | 786.1 | 561.1 | 207.8 | 524.7    | 423.8            | 759.7            |

**Table S2 Concentration of Human Milk Oligosaccharides in Term or Preterm Milk At Different Weeks Postpartum Separated By Milk Group**

\* When there are results below the method limit of quantification (LoQ) the result has been assigned value of  $0.5 \times \text{LoQ}$ , hence the minimum value appears to be the same in many cases. When a large number of datapoints are below LoQ this can also have the effect that the median = minimum.

| HMO  | Milk Group | Study Arm | Week Post Partum | N | HMO Concentration (mg/L) |       |       |       |          |                  |                  |
|------|------------|-----------|------------------|---|--------------------------|-------|-------|-------|----------|------------------|------------------|
|      |            |           |                  |   | min *                    | max   | mean  | sd    | median * | Quartile 1 (25%) | Quartile 3 (75%) |
| 6'SL | G2         | TERM      | 3                | 5 | 262.0                    | 718.6 | 478.3 | 178.3 | 491.0    | 355.6            | 564.6            |
| 6'SL | G2         | TERM      | 4                | 5 | 202.8                    | 623.8 | 417.7 | 157.9 | 457.8    | 334.8            | 469.3            |
| 6'SL | G2         | TERM      | 5                | 5 | 129.4                    | 549.1 | 336.2 | 157.3 | 365.6    | 249.8            | 387.3            |
| 6'SL | G2         | TERM      | 6                | 5 | 112.5                    | 318.7 | 204.6 | 89.82 | 179.5    | 134.9            | 277.4            |
| 6'SL | G2         | TERM      | 7                | 5 | 89.66                    | 234.6 | 173.6 | 72.82 | 220.1    | 98.67            | 225.2            |
| 6'SL | G2         | TERM      | 8                | 5 | 86.83                    | 211.6 | 161.8 | 52.93 | 176.2    | 129.6            | 205.0            |
| 6'SL | G3         | PRE-TERM  | 1                | 1 | 673.9                    | 673.9 | 673.9 | NA    | 673.9    | 673.9            | 673.9            |
| 6'SL | G3         | PRE-TERM  | 2                | 1 | 654.3                    | 654.3 | 654.3 | NA    | 654.3    | 654.3            | 654.3            |
| 6'SL | G3         | PRE-TERM  | 3                | 1 | 441.3                    | 441.3 | 441.3 | NA    | 441.3    | 441.3            | 441.3            |
| 6'SL | G3         | PRE-TERM  | 4                | 1 | 324.0                    | 324.0 | 324.0 | NA    | 324.0    | 324.0            | 324.0            |
| 6'SL | G3         | PRE-TERM  | 5                | 1 | 270.7                    | 270.7 | 270.7 | NA    | 270.7    | 270.7            | 270.7            |
| 6'SL | G3         | PRE-TERM  | 6                | 1 | 229.1                    | 229.1 | 229.1 | NA    | 229.1    | 229.1            | 229.1            |
| 6'SL | G3         | PRE-TERM  | 7                | 1 | 128.6                    | 128.6 | 128.6 | NA    | 128.6    | 128.6            | 128.6            |
| 6'SL | G3         | PRE-TERM  | 8                | 1 | 138.2                    | 138.2 | 138.2 | NA    | 138.2    | 138.2            | 138.2            |
| 6'SL | G3         | PRE-TERM  | 10               | 1 | 91.24                    | 91.24 | 91.24 | NA    | 91.24    | 91.24            | 91.24            |
| 6'SL | G3         | PRE-TERM  | 12               | 1 | 72.75                    | 72.75 | 72.75 | NA    | 72.75    | 72.75            | 72.75            |
| 6'SL | G3         | PRE-TERM  | 14               | 1 | 60.09                    | 60.09 | 60.09 | NA    | 60.09    | 60.09            | 60.09            |
| 6'SL | G3         | PRE-TERM  | 16               | 1 | 48.01                    | 48.01 | 48.01 | NA    | 48.01    | 48.01            | 48.01            |
| 6'SL | G3         | TERM      | 1                | 1 | 648.7                    | 648.7 | 648.7 | NA    | 648.7    | 648.7            | 648.7            |
| 6'SL | G3         | TERM      | 2                | 1 | 598.9                    | 598.9 | 598.9 | NA    | 598.9    | 598.9            | 598.9            |
| 6'SL | G3         | TERM      | 3                | 1 | 511.9                    | 511.9 | 511.9 | NA    | 511.9    | 511.9            | 511.9            |
| 6'SL | G3         | TERM      | 4                | 1 | 419.6                    | 419.6 | 419.6 | NA    | 419.6    | 419.6            | 419.6            |
| 6'SL | G3         | TERM      | 5                | 1 | 355.0                    | 355.0 | 355.0 | NA    | 355.0    | 355.0            | 355.0            |
| 6'SL | G3         | TERM      | 6                | 1 | 294.2                    | 294.2 | 294.2 | NA    | 294.2    | 294.2            | 294.2            |
| 6'SL | G3         | TERM      | 7                | 1 | 273.7                    | 273.7 | 273.7 | NA    | 273.7    | 273.7            | 273.7            |
| 6'SL | G3         | TERM      | 8                | 1 | 192.3                    | 192.3 | 192.3 | NA    | 192.3    | 192.3            | 192.3            |
| 6'SL | G4         | TERM      | 1                | 1 | 436.4                    | 436.4 | 436.4 | NA    | 436.4    | 436.4            | 436.4            |
| 6'SL | G4         | TERM      | 2                | 1 | 888.0                    | 888.0 | 888.0 | NA    | 888.0    | 888.0            | 888.0            |
| 6'SL | G4         | TERM      | 3                | 1 | 670.5                    | 670.5 | 670.5 | NA    | 670.5    | 670.5            | 670.5            |
| 6'SL | G4         | TERM      | 4                | 1 | 489.7                    | 489.7 | 489.7 | NA    | 489.7    | 489.7            | 489.7            |
| 6'SL | G4         | TERM      | 5                | 1 | 357.8                    | 357.8 | 357.8 | NA    | 357.8    | 357.8            | 357.8            |
| 6'SL | G4         | TERM      | 6                | 1 | 305.6                    | 305.6 | 305.6 | NA    | 305.6    | 305.6            | 305.6            |
| 6'SL | G4         | TERM      | 7                | 1 | 193.1                    | 193.1 | 193.1 | NA    | 193.1    | 193.1            | 193.1            |
| 6'SL | G4         | TERM      | 8                | 1 | 150.4                    | 150.4 | 150.4 | NA    | 150.4    | 150.4            | 150.4            |

**Table S2 Concentration of Human Milk Oligosaccharides in Term or Preterm Milk At Different Weeks Postpartum Separated By Milk Group**

\* When there are results below the method limit of quantification (LoQ) the result has been assigned value of  $0.5 \times \text{LoQ}$ , hence the minimum value appears to be the same in many cases. When a large number of datapoints are below LoQ this can also have the effect that the median = minimum.

| HMO               | Milk Group | Study Arm | Week Post Partum | N  | HMO Concentration (mg/L) |       |       |        |          |                  |                  |
|-------------------|------------|-----------|------------------|----|--------------------------|-------|-------|--------|----------|------------------|------------------|
|                   |            |           |                  |    | min *                    | max   | mean  | sd     | median * | Quartile 1 (25%) | Quartile 3 (75%) |
| A-Tetrasaccharide | G1         | PRE-TERM  | 1                | 19 | 7.500                    | 315.1 | 63.25 | 91.82  | 7.500    | 7.500            | 62.65            |
| A-Tetrasaccharide | G1         | PRE-TERM  | 2                | 19 | 7.500                    | 218.2 | 44.59 | 63.96  | 7.500    | 7.500            | 55.77            |
| A-Tetrasaccharide | G1         | PRE-TERM  | 3                | 19 | 7.500                    | 250.0 | 47.75 | 71.06  | 7.500    | 7.500            | 56.82            |
| A-Tetrasaccharide | G1         | PRE-TERM  | 4                | 18 | 7.500                    | 224.7 | 50.08 | 68.81  | 7.500    | 7.500            | 62.59            |
| A-Tetrasaccharide | G1         | PRE-TERM  | 5                | 19 | 7.500                    | 226.0 | 47.29 | 64.82  | 7.500    | 7.500            | 65.24            |
| A-Tetrasaccharide | G1         | PRE-TERM  | 6                | 18 | 7.500                    | 232.6 | 51.49 | 69.77  | 11.34    | 7.500            | 80.93            |
| A-Tetrasaccharide | G1         | PRE-TERM  | 7                | 18 | 7.500                    | 266.6 | 51.89 | 76.09  | 7.500    | 7.500            | 83.86            |
| A-Tetrasaccharide | G1         | PRE-TERM  | 8                | 18 | 7.500                    | 262.8 | 56.15 | 84.73  | 7.500    | 7.500            | 84.89            |
| A-Tetrasaccharide | G1         | PRE-TERM  | 10               | 18 | 7.500                    | 322.7 | 53.88 | 85.50  | 7.500    | 7.500            | 82.15            |
| A-Tetrasaccharide | G1         | PRE-TERM  | 12               | 15 | 7.500                    | 334.5 | 53.68 | 93.23  | 7.500    | 7.500            | 55.86            |
| A-Tetrasaccharide | G1         | PRE-TERM  | 14               | 15 | 7.500                    | 300.7 | 53.93 | 81.65  | 7.500    | 7.500            | 81.50            |
| A-Tetrasaccharide | G1         | PRE-TERM  | 16               | 15 | 7.500                    | 329.8 | 60.03 | 89.45  | 7.500    | 7.500            | 90.98            |
| A-Tetrasaccharide | G1         | TERM      | 1                | 21 | 7.500                    | 188.2 | 46.66 | 57.67  | 7.500    | 7.500            | 62.07            |
| A-Tetrasaccharide | G1         | TERM      | 2                | 19 | 7.500                    | 149.0 | 33.93 | 39.65  | 7.500    | 7.500            | 40.79            |
| A-Tetrasaccharide | G1         | TERM      | 3                | 21 | 7.500                    | 153.9 | 29.67 | 39.53  | 7.500    | 7.500            | 33.43            |
| A-Tetrasaccharide | G1         | TERM      | 4                | 21 | 7.500                    | 162.3 | 31.90 | 41.06  | 7.500    | 7.500            | 39.78            |
| A-Tetrasaccharide | G1         | TERM      | 5                | 21 | 7.500                    | 138.9 | 29.05 | 36.05  | 7.500    | 7.500            | 32.57            |
| A-Tetrasaccharide | G1         | TERM      | 6                | 20 | 7.500                    | 183.8 | 31.68 | 46.45  | 7.500    | 7.500            | 29.48            |
| A-Tetrasaccharide | G1         | TERM      | 7                | 20 | 7.500                    | 165.4 | 30.38 | 43.10  | 7.500    | 7.500            | 32.30            |
| A-Tetrasaccharide | G1         | TERM      | 8                | 21 | 7.500                    | 181.0 | 30.42 | 45.42  | 7.500    | 7.500            | 26.08            |
| A-Tetrasaccharide | G2         | PRE-TERM  | 1                | 5  | 7.500                    | 7.500 | 7.500 | 0.0000 | 7.500    | 7.500            | 7.500            |
| A-Tetrasaccharide | G2         | PRE-TERM  | 2                | 5  | 7.500                    | 7.500 | 7.500 | 0.0000 | 7.500    | 7.500            | 7.500            |
| A-Tetrasaccharide | G2         | PRE-TERM  | 3                | 5  | 7.500                    | 7.500 | 7.500 | 0.0000 | 7.500    | 7.500            | 7.500            |
| A-Tetrasaccharide | G2         | PRE-TERM  | 4                | 5  | 7.500                    | 7.500 | 7.500 | 0.0000 | 7.500    | 7.500            | 7.500            |
| A-Tetrasaccharide | G2         | PRE-TERM  | 5                | 5  | 7.500                    | 7.500 | 7.500 | 0.0000 | 7.500    | 7.500            | 7.500            |
| A-Tetrasaccharide | G2         | PRE-TERM  | 6                | 5  | 7.500                    | 16.81 | 9.361 | 4.162  | 7.500    | 7.500            | 7.500            |
| A-Tetrasaccharide | G2         | PRE-TERM  | 7                | 5  | 7.500                    | 7.500 | 7.500 | 0.0000 | 7.500    | 7.500            | 7.500            |
| A-Tetrasaccharide | G2         | PRE-TERM  | 8                | 5  | 7.500                    | 7.500 | 7.500 | 0.0000 | 7.500    | 7.500            | 7.500            |
| A-Tetrasaccharide | G2         | PRE-TERM  | 10               | 4  | 7.500                    | 7.500 | 7.500 | 0.0000 | 7.500    | 7.500            | 7.500            |
| A-Tetrasaccharide | G2         | PRE-TERM  | 12               | 5  | 7.500                    | 7.500 | 7.500 | 0.0000 | 7.500    | 7.500            | 7.500            |
| A-Tetrasaccharide | G2         | PRE-TERM  | 14               | 5  | 7.500                    | 7.500 | 7.500 | 0.0000 | 7.500    | 7.500            | 7.500            |
| A-Tetrasaccharide | G2         | PRE-TERM  | 16               | 3  | 7.500                    | 7.500 | 7.500 | 0.0000 | 7.500    | 7.500            | 7.500            |
| A-Tetrasaccharide | G2         | TERM      | 1                | 5  | 7.500                    | 7.500 | 7.500 | 0.0000 | 7.500    | 7.500            | 7.500            |
| A-Tetrasaccharide | G2         | TERM      | 2                | 5  | 7.500                    | 7.500 | 7.500 | 0.0000 | 7.500    | 7.500            | 7.500            |

**Table S2 Concentration of Human Milk Oligosaccharides in Term or Preterm Milk At Different Weeks Postpartum Separated By Milk Group**

*\* When there are results below the method limit of quantification (LoQ) the result has been assigned value of  $0.5 \times \text{LoQ}$ , hence the minimum value appears to be the same in many cases. When a large number of datapoints are below LoQ this can also have the effect that the median = minimum.*

| HMO               | Milk Group | Study Arm | Week Post Partum | N | HMO Concentration (mg/L) |       |       |        |          |                  |                  |
|-------------------|------------|-----------|------------------|---|--------------------------|-------|-------|--------|----------|------------------|------------------|
|                   |            |           |                  |   | min *                    | max   | mean  | sd     | median * | Quartile 1 (25%) | Quartile 3 (75%) |
| A-Tetrasaccharide | G2         | TERM      | 3                | 5 | 7.500                    | 7.500 | 7.500 | 0.0000 | 7.500    | 7.500            | 7.500            |
| A-Tetrasaccharide | G2         | TERM      | 4                | 5 | 7.500                    | 28.98 | 11.80 | 9.605  | 7.500    | 7.500            | 7.500            |
| A-Tetrasaccharide | G2         | TERM      | 5                | 5 | 7.500                    | 27.37 | 11.47 | 8.886  | 7.500    | 7.500            | 7.500            |
| A-Tetrasaccharide | G2         | TERM      | 6                | 5 | 7.500                    | 7.500 | 7.500 | 0.0000 | 7.500    | 7.500            | 7.500            |
| A-Tetrasaccharide | G2         | TERM      | 7                | 5 | 7.500                    | 7.500 | 7.500 | 0.0000 | 7.500    | 7.500            | 7.500            |
| A-Tetrasaccharide | G2         | TERM      | 8                | 5 | 7.500                    | 7.500 | 7.500 | 0.0000 | 7.500    | 7.500            | 7.500            |
| A-Tetrasaccharide | G3         | PRE-TERM  | 1                | 1 | 7.500                    | 7.500 | 7.500 | NA     | 7.500    | 7.500            | 7.500            |
| A-Tetrasaccharide | G3         | PRE-TERM  | 2                | 1 | 7.500                    | 7.500 | 7.500 | NA     | 7.500    | 7.500            | 7.500            |
| A-Tetrasaccharide | G3         | PRE-TERM  | 3                | 1 | 7.500                    | 7.500 | 7.500 | NA     | 7.500    | 7.500            | 7.500            |
| A-Tetrasaccharide | G3         | PRE-TERM  | 4                | 1 | 7.500                    | 7.500 | 7.500 | NA     | 7.500    | 7.500            | 7.500            |
| A-Tetrasaccharide | G3         | PRE-TERM  | 5                | 1 | 7.500                    | 7.500 | 7.500 | NA     | 7.500    | 7.500            | 7.500            |
| A-Tetrasaccharide | G3         | PRE-TERM  | 6                | 1 | 7.500                    | 7.500 | 7.500 | NA     | 7.500    | 7.500            | 7.500            |
| A-Tetrasaccharide | G3         | PRE-TERM  | 7                | 1 | 7.500                    | 7.500 | 7.500 | NA     | 7.500    | 7.500            | 7.500            |
| A-Tetrasaccharide | G3         | PRE-TERM  | 8                | 1 | 7.500                    | 7.500 | 7.500 | NA     | 7.500    | 7.500            | 7.500            |
| A-Tetrasaccharide | G3         | PRE-TERM  | 10               | 1 | 7.500                    | 7.500 | 7.500 | NA     | 7.500    | 7.500            | 7.500            |
| A-Tetrasaccharide | G3         | PRE-TERM  | 12               | 1 | 7.500                    | 7.500 | 7.500 | NA     | 7.500    | 7.500            | 7.500            |
| A-Tetrasaccharide | G3         | PRE-TERM  | 14               | 1 | 7.500                    | 7.500 | 7.500 | NA     | 7.500    | 7.500            | 7.500            |
| A-Tetrasaccharide | G3         | PRE-TERM  | 16               | 1 | 7.500                    | 7.500 | 7.500 | NA     | 7.500    | 7.500            | 7.500            |
| A-Tetrasaccharide | G3         | TERM      | 1                | 1 | 43.15                    | 43.15 | 43.15 | NA     | 43.15    | 43.15            | 43.15            |
| A-Tetrasaccharide | G3         | TERM      | 2                | 1 | 47.28                    | 47.28 | 47.28 | NA     | 47.28    | 47.28            | 47.28            |
| A-Tetrasaccharide | G3         | TERM      | 3                | 1 | 46.17                    | 46.17 | 46.17 | NA     | 46.17    | 46.17            | 46.17            |
| A-Tetrasaccharide | G3         | TERM      | 4                | 1 | 41.87                    | 41.87 | 41.87 | NA     | 41.87    | 41.87            | 41.87            |
| A-Tetrasaccharide | G3         | TERM      | 5                | 1 | 36.38                    | 36.38 | 36.38 | NA     | 36.38    | 36.38            | 36.38            |
| A-Tetrasaccharide | G3         | TERM      | 6                | 1 | 37.04                    | 37.04 | 37.04 | NA     | 37.04    | 37.04            | 37.04            |
| A-Tetrasaccharide | G3         | TERM      | 7                | 1 | 27.14                    | 27.14 | 27.14 | NA     | 27.14    | 27.14            | 27.14            |
| A-Tetrasaccharide | G3         | TERM      | 8                | 1 | 33.98                    | 33.98 | 33.98 | NA     | 33.98    | 33.98            | 33.98            |
| A-Tetrasaccharide | G4         | TERM      | 1                | 1 | 7.500                    | 7.500 | 7.500 | NA     | 7.500    | 7.500            | 7.500            |
| A-Tetrasaccharide | G4         | TERM      | 2                | 1 | 7.500                    | 7.500 | 7.500 | NA     | 7.500    | 7.500            | 7.500            |
| A-Tetrasaccharide | G4         | TERM      | 3                | 1 | 7.500                    | 7.500 | 7.500 | NA     | 7.500    | 7.500            | 7.500            |
| A-Tetrasaccharide | G4         | TERM      | 4                | 1 | 7.500                    | 7.500 | 7.500 | NA     | 7.500    | 7.500            | 7.500            |
| A-Tetrasaccharide | G4         | TERM      | 5                | 1 | 7.500                    | 7.500 | 7.500 | NA     | 7.500    | 7.500            | 7.500            |
| A-Tetrasaccharide | G4         | TERM      | 6                | 1 | 7.500                    | 7.500 | 7.500 | NA     | 7.500    | 7.500            | 7.500            |
| A-Tetrasaccharide | G4         | TERM      | 7                | 1 | 7.500                    | 7.500 | 7.500 | NA     | 7.500    | 7.500            | 7.500            |
| A-Tetrasaccharide | G4         | TERM      | 8                | 1 | 7.500                    | 7.500 | 7.500 | NA     | 7.500    | 7.500            | 7.500            |

**Table S2 Concentration of Human Milk Oligosaccharides in Term or Preterm Milk At Different Weeks Postpartum Separated By Milk Group**

\* When there are results below the method limit of quantification (LoQ) the result has been assigned value of  $0.5 \times \text{LoQ}$ , hence the minimum value appears to be the same in many cases. When a large number of datapoints are below LoQ this can also have the effect that the median = minimum.

| HMO    | Milk Group | Study Arm | Week<br>Post Partum | N  | HMO Concentration (mg/L) |       |       |        |          |                     |                     |
|--------|------------|-----------|---------------------|----|--------------------------|-------|-------|--------|----------|---------------------|---------------------|
|        |            |           |                     |    | min *                    | max   | mean  | sd     | median * | Quartile 1<br>(25%) | Quartile 3<br>(75%) |
| DFLNHa | G1         | PRE-TERM  | 1                   | 19 | 16.50                    | 420.0 | 187.6 | 114.4  | 151.7    | 116.4               | 248.4               |
| DFLNHa | G1         | PRE-TERM  | 2                   | 19 | 16.50                    | 448.7 | 215.6 | 129.2  | 197.9    | 109.0               | 317.7               |
| DFLNHa | G1         | PRE-TERM  | 3                   | 19 | 16.50                    | 364.2 | 189.7 | 103.8  | 201.5    | 107.4               | 266.0               |
| DFLNHa | G1         | PRE-TERM  | 4                   | 18 | 16.50                    | 323.6 | 167.2 | 88.40  | 179.0    | 94.93               | 228.2               |
| DFLNHa | G1         | PRE-TERM  | 5                   | 19 | 16.50                    | 260.8 | 127.4 | 63.05  | 138.9    | 68.79               | 166.0               |
| DFLNHa | G1         | PRE-TERM  | 6                   | 18 | 16.50                    | 685.1 | 152.8 | 146.4  | 136.0    | 94.85               | 151.3               |
| DFLNHa | G1         | PRE-TERM  | 7                   | 18 | 16.50                    | 285.3 | 100.9 | 65.17  | 84.94    | 63.73               | 135.1               |
| DFLNHa | G1         | PRE-TERM  | 8                   | 18 | 16.50                    | 252.0 | 103.0 | 65.85  | 96.74    | 58.65               | 135.5               |
| DFLNHa | G1         | PRE-TERM  | 10                  | 18 | 16.50                    | 103.6 | 50.74 | 32.58  | 51.50    | 16.50               | 79.64               |
| DFLNHa | G1         | PRE-TERM  | 12                  | 15 | 16.50                    | 83.70 | 40.26 | 21.61  | 38.58    | 16.50               | 54.49               |
| DFLNHa | G1         | PRE-TERM  | 14                  | 15 | 16.50                    | 77.74 | 40.22 | 19.83  | 43.98    | 16.50               | 52.75               |
| DFLNHa | G1         | PRE-TERM  | 16                  | 15 | 16.50                    | 60.97 | 32.50 | 16.46  | 37.84    | 16.50               | 44.38               |
| DFLNHa | G1         | TERM      | 1                   | 21 | 16.50                    | 306.3 | 158.0 | 79.74  | 158.2    | 90.49               | 184.8               |
| DFLNHa | G1         | TERM      | 2                   | 19 | 97.87                    | 582.8 | 272.2 | 129.7  | 250.9    | 185.1               | 320.1               |
| DFLNHa | G1         | TERM      | 3                   | 21 | 89.36                    | 472.0 | 256.4 | 112.1  | 240.4    | 190.4               | 341.2               |
| DFLNHa | G1         | TERM      | 4                   | 21 | 66.82                    | 473.0 | 237.9 | 113.7  | 206.3    | 170.4               | 342.7               |
| DFLNHa | G1         | TERM      | 5                   | 21 | 53.69                    | 383.9 | 192.5 | 108.0  | 163.0    | 120.9               | 283.7               |
| DFLNHa | G1         | TERM      | 6                   | 20 | 16.50                    | 343.0 | 149.2 | 90.54  | 133.6    | 103.6               | 194.9               |
| DFLNHa | G1         | TERM      | 7                   | 20 | 16.50                    | 247.1 | 113.1 | 71.31  | 115.1    | 62.16               | 130.5               |
| DFLNHa | G1         | TERM      | 8                   | 21 | 16.50                    | 311.2 | 105.5 | 83.70  | 81.61    | 48.27               | 129.0               |
| DFLNHa | G2         | PRE-TERM  | 1                   | 5  | 16.50                    | 16.50 | 16.50 | 0.0000 | 16.50    | 16.50               | 16.50               |
| DFLNHa | G2         | PRE-TERM  | 2                   | 5  | 16.50                    | 16.50 | 16.50 | 0.0000 | 16.50    | 16.50               | 16.50               |
| DFLNHa | G2         | PRE-TERM  | 3                   | 5  | 16.50                    | 16.50 | 16.50 | 0.0000 | 16.50    | 16.50               | 16.50               |
| DFLNHa | G2         | PRE-TERM  | 4                   | 5  | 16.50                    | 16.50 | 16.50 | 0.0000 | 16.50    | 16.50               | 16.50               |
| DFLNHa | G2         | PRE-TERM  | 5                   | 5  | 16.50                    | 16.50 | 16.50 | 0.0000 | 16.50    | 16.50               | 16.50               |
| DFLNHa | G2         | PRE-TERM  | 6                   | 5  | 16.50                    | 16.50 | 16.50 | 0.0000 | 16.50    | 16.50               | 16.50               |
| DFLNHa | G2         | PRE-TERM  | 7                   | 5  | 16.50                    | 42.44 | 21.69 | 11.60  | 16.50    | 16.50               | 16.50               |
| DFLNHa | G2         | PRE-TERM  | 8                   | 5  | 16.50                    | 42.01 | 21.60 | 11.41  | 16.50    | 16.50               | 16.50               |
| DFLNHa | G2         | PRE-TERM  | 10                  | 4  | 16.50                    | 16.50 | 16.50 | 0.0000 | 16.50    | 16.50               | 16.50               |
| DFLNHa | G2         | PRE-TERM  | 12                  | 5  | 16.50                    | 36.86 | 20.57 | 9.104  | 16.50    | 16.50               | 16.50               |
| DFLNHa | G2         | PRE-TERM  | 14                  | 5  | 16.50                    | 139.6 | 41.13 | 55.06  | 16.50    | 16.50               | 16.50               |
| DFLNHa | G2         | PRE-TERM  | 16                  | 3  | 16.50                    | 16.50 | 16.50 | 0.0000 | 16.50    | 16.50               | 16.50               |
| DFLNHa | G2         | TERM      | 1                   | 5  | 16.50                    | 16.50 | 16.50 | 0.0000 | 16.50    | 16.50               | 16.50               |
| DFLNHa | G2         | TERM      | 2                   | 5  | 16.50                    | 16.50 | 16.50 | 0.0000 | 16.50    | 16.50               | 16.50               |

**Table S2 Concentration of Human Milk Oligosaccharides in Term or Preterm Milk At Different Weeks Postpartum Separated By Milk Group**

\* When there are results below the method limit of quantification (LoQ) the result has been assigned value of  $0.5 \times \text{LoQ}$ , hence the minimum value appears to be the same in many cases. When a large number of datapoints are below LoQ this can also have the effect that the median = minimum.

| HMO    | Milk Group | Study Arm | Week<br>Post Partum | N | HMO Concentration (mg/L) |       |       |        |          |                     |                     |
|--------|------------|-----------|---------------------|---|--------------------------|-------|-------|--------|----------|---------------------|---------------------|
|        |            |           |                     |   | min *                    | max   | mean  | sd     | median * | Quartile 1<br>(25%) | Quartile 3<br>(75%) |
| DFLNHa | G2         | TERM      | 3                   | 5 | 16.50                    | 16.50 | 16.50 | 0.0000 | 16.50    | 16.50               | 16.50               |
| DFLNHa | G2         | TERM      | 4                   | 5 | 16.50                    | 16.50 | 16.50 | 0.0000 | 16.50    | 16.50               | 16.50               |
| DFLNHa | G2         | TERM      | 5                   | 5 | 16.50                    | 16.50 | 16.50 | 0.0000 | 16.50    | 16.50               | 16.50               |
| DFLNHa | G2         | TERM      | 6                   | 5 | 16.50                    | 16.50 | 16.50 | 0.0000 | 16.50    | 16.50               | 16.50               |
| DFLNHa | G2         | TERM      | 7                   | 5 | 16.50                    | 16.50 | 16.50 | 0.0000 | 16.50    | 16.50               | 16.50               |
| DFLNHa | G2         | TERM      | 8                   | 5 | 16.50                    | 16.50 | 16.50 | 0.0000 | 16.50    | 16.50               | 16.50               |
| DFLNHa | G3         | PRE-TERM  | 1                   | 1 | 577.3                    | 577.3 | 577.3 | NA     | 577.3    | 577.3               | 577.3               |
| DFLNHa | G3         | PRE-TERM  | 2                   | 1 | 495.2                    | 495.2 | 495.2 | NA     | 495.2    | 495.2               | 495.2               |
| DFLNHa | G3         | PRE-TERM  | 3                   | 1 | 430.4                    | 430.4 | 430.4 | NA     | 430.4    | 430.4               | 430.4               |
| DFLNHa | G3         | PRE-TERM  | 4                   | 1 | 583.6                    | 583.6 | 583.6 | NA     | 583.6    | 583.6               | 583.6               |
| DFLNHa | G3         | PRE-TERM  | 5                   | 1 | 623.8                    | 623.8 | 623.8 | NA     | 623.8    | 623.8               | 623.8               |
| DFLNHa | G3         | PRE-TERM  | 6                   | 1 | 542.4                    | 542.4 | 542.4 | NA     | 542.4    | 542.4               | 542.4               |
| DFLNHa | G3         | PRE-TERM  | 7                   | 1 | 418.7                    | 418.7 | 418.7 | NA     | 418.7    | 418.7               | 418.7               |
| DFLNHa | G3         | PRE-TERM  | 8                   | 1 | 351.9                    | 351.9 | 351.9 | NA     | 351.9    | 351.9               | 351.9               |
| DFLNHa | G3         | PRE-TERM  | 10                  | 1 | 249.7                    | 249.7 | 249.7 | NA     | 249.7    | 249.7               | 249.7               |
| DFLNHa | G3         | PRE-TERM  | 12                  | 1 | 179.2                    | 179.2 | 179.2 | NA     | 179.2    | 179.2               | 179.2               |
| DFLNHa | G3         | PRE-TERM  | 14                  | 1 | 58.00                    | 58.00 | 58.00 | NA     | 58.00    | 58.00               | 58.00               |
| DFLNHa | G3         | PRE-TERM  | 16                  | 1 | 54.78                    | 54.78 | 54.78 | NA     | 54.78    | 54.78               | 54.78               |
| DFLNHa | G3         | TERM      | 1                   | 1 | 488.4                    | 488.4 | 488.4 | NA     | 488.4    | 488.4               | 488.4               |
| DFLNHa | G3         | TERM      | 2                   | 1 | 664.0                    | 664.0 | 664.0 | NA     | 664.0    | 664.0               | 664.0               |
| DFLNHa | G3         | TERM      | 3                   | 1 | 759.1                    | 759.1 | 759.1 | NA     | 759.1    | 759.1               | 759.1               |
| DFLNHa | G3         | TERM      | 4                   | 1 | 709.4                    | 709.4 | 709.4 | NA     | 709.4    | 709.4               | 709.4               |
| DFLNHa | G3         | TERM      | 5                   | 1 | 747.0                    | 747.0 | 747.0 | NA     | 747.0    | 747.0               | 747.0               |
| DFLNHa | G3         | TERM      | 6                   | 1 | 563.0                    | 563.0 | 563.0 | NA     | 563.0    | 563.0               | 563.0               |
| DFLNHa | G3         | TERM      | 7                   | 1 | 525.5                    | 525.5 | 525.5 | NA     | 525.5    | 525.5               | 525.5               |
| DFLNHa | G3         | TERM      | 8                   | 1 | 463.1                    | 463.1 | 463.1 | NA     | 463.1    | 463.1               | 463.1               |
| DFLNHa | G4         | TERM      | 1                   | 1 | 16.50                    | 16.50 | 16.50 | NA     | 16.50    | 16.50               | 16.50               |
| DFLNHa | G4         | TERM      | 2                   | 1 | 52.78                    | 52.78 | 52.78 | NA     | 52.78    | 52.78               | 52.78               |
| DFLNHa | G4         | TERM      | 3                   | 1 | 16.50                    | 16.50 | 16.50 | NA     | 16.50    | 16.50               | 16.50               |
| DFLNHa | G4         | TERM      | 4                   | 1 | 16.50                    | 16.50 | 16.50 | NA     | 16.50    | 16.50               | 16.50               |
| DFLNHa | G4         | TERM      | 5                   | 1 | 16.50                    | 16.50 | 16.50 | NA     | 16.50    | 16.50               | 16.50               |
| DFLNHa | G4         | TERM      | 6                   | 1 | 16.50                    | 16.50 | 16.50 | NA     | 16.50    | 16.50               | 16.50               |
| DFLNHa | G4         | TERM      | 7                   | 1 | 16.50                    | 16.50 | 16.50 | NA     | 16.50    | 16.50               | 16.50               |
| DFLNHa | G4         | TERM      | 8                   | 1 | 16.50                    | 16.50 | 16.50 | NA     | 16.50    | 16.50               | 16.50               |



**Table S2 Concentration of Human Milk Oligosaccharides in Term or Preterm Milk At Different Weeks Postpartum Separated By Milk Group**

\* When there are results below the method limit of quantification (LoQ) the result has been assigned value of  $0.5 \times \text{LoQ}$ , hence the minimum value appears to be the same in many cases. When a large number of datapoints are below LoQ this can also have the effect that the median = minimum.

| HMO   | Milk Group | Study Arm | Week Post Partum | N  | HMO Concentration (mg/L) |       |       |       |          |                  |                  |
|-------|------------|-----------|------------------|----|--------------------------|-------|-------|-------|----------|------------------|------------------|
|       |            |           |                  |    | min *                    | max   | mean  | sd    | median * | Quartile 1 (25%) | Quartile 3 (75%) |
| DSLNT | G1         | PRE-TERM  | 1                | 19 | 17.50                    | 703.2 | 355.6 | 175.6 | 385.2    | 263.4            | 461.4            |
| DSLNT | G1         | PRE-TERM  | 2                | 19 | 17.50                    | 822.5 | 428.1 | 185.4 | 401.0    | 336.8            | 526.7            |
| DSLNT | G1         | PRE-TERM  | 3                | 19 | 169.1                    | 908.0 | 441.5 | 211.6 | 354.2    | 300.2            | 484.2            |
| DSLNT | G1         | PRE-TERM  | 4                | 18 | 128.4                    | 796.0 | 395.2 | 193.6 | 325.1    | 276.1            | 471.3            |
| DSLNT | G1         | PRE-TERM  | 5                | 19 | 129.9                    | 811.9 | 366.8 | 196.4 | 291.5    | 235.4            | 430.9            |
| DSLNT | G1         | PRE-TERM  | 6                | 18 | 105.5                    | 628.2 | 300.1 | 150.9 | 260.3    | 203.3            | 336.3            |
| DSLNT | G1         | PRE-TERM  | 7                | 18 | 100.2                    | 597.5 | 292.6 | 153.6 | 218.5    | 182.1            | 362.1            |
| DSLNT | G1         | PRE-TERM  | 8                | 18 | 97.12                    | 530.6 | 278.8 | 132.9 | 233.6    | 183.7            | 398.9            |
| DSLNT | G1         | PRE-TERM  | 10               | 18 | 84.32                    | 435.1 | 232.6 | 105.8 | 200.8    | 162.4            | 310.2            |
| DSLNT | G1         | PRE-TERM  | 12               | 15 | 72.56                    | 336.6 | 212.2 | 75.11 | 203.4    | 161.8            | 273.7            |
| DSLNT | G1         | PRE-TERM  | 14               | 15 | 102.0                    | 311.8 | 185.5 | 64.84 | 169.3    | 135.4            | 238.7            |
| DSLNT | G1         | PRE-TERM  | 16               | 15 | 88.23                    | 253.6 | 175.6 | 49.76 | 173.3    | 149.4            | 212.5            |
| DSLNT | G1         | TERM      | 1                | 21 | 212.2                    | 649.5 | 353.0 | 104.7 | 340.2    | 273.5            | 385.7            |
| DSLNT | G1         | TERM      | 2                | 19 | 17.50                    | 880.1 | 367.6 | 179.1 | 363.2    | 255.8            | 439.6            |
| DSLNT | G1         | TERM      | 3                | 21 | 117.1                    | 836.5 | 380.3 | 143.7 | 396.2    | 293.3            | 421.1            |
| DSLNT | G1         | TERM      | 4                | 21 | 94.18                    | 630.2 | 318.8 | 114.4 | 328.2    | 248.5            | 383.5            |
| DSLNT | G1         | TERM      | 5                | 21 | 75.20                    | 555.7 | 259.1 | 103.4 | 274.8    | 205.7            | 294.1            |
| DSLNT | G1         | TERM      | 6                | 20 | 69.19                    | 426.1 | 239.6 | 89.63 | 220.7    | 184.2            | 307.0            |
| DSLNT | G1         | TERM      | 7                | 20 | 48.04                    | 437.5 | 219.8 | 92.25 | 193.7    | 158.0            | 286.2            |
| DSLNT | G1         | TERM      | 8                | 21 | 60.14                    | 422.7 | 179.3 | 80.01 | 169.8    | 121.5            | 213.7            |
| DSLNT | G2         | PRE-TERM  | 1                | 5  | 340.2                    | 946.4 | 710.0 | 229.5 | 719.0    | 701.2            | 843.4            |
| DSLNT | G2         | PRE-TERM  | 2                | 5  | 460.2                    | 843.2 | 601.8 | 155.8 | 557.9    | 486.4            | 661.2            |
| DSLNT | G2         | PRE-TERM  | 3                | 5  | 433.2                    | 786.4 | 567.4 | 132.6 | 555.3    | 503.0            | 559.2            |
| DSLNT | G2         | PRE-TERM  | 4                | 5  | 380.6                    | 586.5 | 511.3 | 78.71 | 522.6    | 511.9            | 554.9            |
| DSLNT | G2         | PRE-TERM  | 5                | 5  | 383.5                    | 590.1 | 447.7 | 82.57 | 420.6    | 401.6            | 443.0            |
| DSLNT | G2         | PRE-TERM  | 6                | 5  | 344.4                    | 579.5 | 430.7 | 89.21 | 411.8    | 387.2            | 430.6            |
| DSLNT | G2         | PRE-TERM  | 7                | 5  | 264.8                    | 677.8 | 383.9 | 168.1 | 312.6    | 300.0            | 364.4            |
| DSLNT | G2         | PRE-TERM  | 8                | 5  | 226.1                    | 364.8 | 275.5 | 53.26 | 259.6    | 249.6            | 277.2            |
| DSLNT | G2         | PRE-TERM  | 10               | 4  | 158.8                    | 256.3 | 207.4 | 44.63 | 207.3    | 176.6            | 238.2            |
| DSLNT | G2         | PRE-TERM  | 12               | 5  | 131.9                    | 452.7 | 224.4 | 134.7 | 160.9    | 136.9            | 239.5            |
| DSLNT | G2         | PRE-TERM  | 14               | 5  | 131.9                    | 321.5 | 201.0 | 77.40 | 176.5    | 144.4            | 230.5            |
| DSLNT | G2         | PRE-TERM  | 16               | 3  | 118.9                    | 459.9 | 263.6 | 176.2 | 212.0    | 165.5            | 335.9            |
| DSLNT | G2         | TERM      | 1                | 5  | 262.5                    | 540.0 | 368.0 | 119.3 | 304.3    | 288.7            | 444.5            |
| DSLNT | G2         | TERM      | 2                | 5  | 146.3                    | 490.1 | 317.1 | 124.5 | 326.6    | 274.5            | 347.8            |

**Table S2 Concentration of Human Milk Oligosaccharides in Term or Preterm Milk At Different Weeks Postpartum Separated By Milk Group**

\* When there are results below the method limit of quantification (LoQ) the result has been assigned value of  $0.5 \times \text{LoQ}$ , hence the minimum value appears to be the same in many cases. When a large number of datapoints are below LoQ this can also have the effect that the median = minimum.

| HMO   | Milk Group | Study Arm | Week<br>Post Partum | N | HMO Concentration (mg/L) |       |       |       |          |                     |                     |
|-------|------------|-----------|---------------------|---|--------------------------|-------|-------|-------|----------|---------------------|---------------------|
|       |            |           |                     |   | min *                    | max   | mean  | sd    | median * | Quartile 1<br>(25%) | Quartile 3<br>(75%) |
| DSLNT | G2         | TERM      | 3                   | 5 | 135.3                    | 480.2 | 294.4 | 127.1 | 265.9    | 250.9               | 340.0               |
| DSLNT | G2         | TERM      | 4                   | 5 | 129.5                    | 332.1 | 237.6 | 90.24 | 224.7    | 175.1               | 326.4               |
| DSLNT | G2         | TERM      | 5                   | 5 | 105.1                    | 318.1 | 212.3 | 98.73 | 161.6    | 159.5               | 316.9               |
| DSLNT | G2         | TERM      | 6                   | 5 | 48.35                    | 312.0 | 180.7 | 121.0 | 150.1    | 90.80               | 302.1               |
| DSLNT | G2         | TERM      | 7                   | 5 | 74.88                    | 203.7 | 132.2 | 53.18 | 127.3    | 89.74               | 165.1               |
| DSLNT | G2         | TERM      | 8                   | 5 | 69.77                    | 224.3 | 134.3 | 67.70 | 115.3    | 77.83               | 184.6               |
| DSLNT | G3         | PRE-TERM  | 1                   | 1 | 259.3                    | 259.3 | 259.3 | NA    | 259.3    | 259.3               | 259.3               |
| DSLNT | G3         | PRE-TERM  | 2                   | 1 | 495.6                    | 495.6 | 495.6 | NA    | 495.6    | 495.6               | 495.6               |
| DSLNT | G3         | PRE-TERM  | 3                   | 1 | 470.6                    | 470.6 | 470.6 | NA    | 470.6    | 470.6               | 470.6               |
| DSLNT | G3         | PRE-TERM  | 4                   | 1 | 304.9                    | 304.9 | 304.9 | NA    | 304.9    | 304.9               | 304.9               |
| DSLNT | G3         | PRE-TERM  | 5                   | 1 | 244.0                    | 244.0 | 244.0 | NA    | 244.0    | 244.0               | 244.0               |
| DSLNT | G3         | PRE-TERM  | 6                   | 1 | 196.7                    | 196.7 | 196.7 | NA    | 196.7    | 196.7               | 196.7               |
| DSLNT | G3         | PRE-TERM  | 7                   | 1 | 159.2                    | 159.2 | 159.2 | NA    | 159.2    | 159.2               | 159.2               |
| DSLNT | G3         | PRE-TERM  | 8                   | 1 | 129.6                    | 129.6 | 129.6 | NA    | 129.6    | 129.6               | 129.6               |
| DSLNT | G3         | PRE-TERM  | 10                  | 1 | 102.6                    | 102.6 | 102.6 | NA    | 102.6    | 102.6               | 102.6               |
| DSLNT | G3         | PRE-TERM  | 12                  | 1 | 96.95                    | 96.95 | 96.95 | NA    | 96.95    | 96.95               | 96.95               |
| DSLNT | G3         | PRE-TERM  | 14                  | 1 | 97.17                    | 97.17 | 97.17 | NA    | 97.17    | 97.17               | 97.17               |
| DSLNT | G3         | PRE-TERM  | 16                  | 1 | 97.08                    | 97.08 | 97.08 | NA    | 97.08    | 97.08               | 97.08               |
| DSLNT | G3         | TERM      | 1                   | 1 | 163.6                    | 163.6 | 163.6 | NA    | 163.6    | 163.6               | 163.6               |
| DSLNT | G3         | TERM      | 2                   | 1 | 190.7                    | 190.7 | 190.7 | NA    | 190.7    | 190.7               | 190.7               |
| DSLNT | G3         | TERM      | 3                   | 1 | 218.6                    | 218.6 | 218.6 | NA    | 218.6    | 218.6               | 218.6               |
| DSLNT | G3         | TERM      | 4                   | 1 | 199.4                    | 199.4 | 199.4 | NA    | 199.4    | 199.4               | 199.4               |
| DSLNT | G3         | TERM      | 5                   | 1 | 171.3                    | 171.3 | 171.3 | NA    | 171.3    | 171.3               | 171.3               |
| DSLNT | G3         | TERM      | 6                   | 1 | 156.0                    | 156.0 | 156.0 | NA    | 156.0    | 156.0               | 156.0               |
| DSLNT | G3         | TERM      | 7                   | 1 | 129.3                    | 129.3 | 129.3 | NA    | 129.3    | 129.3               | 129.3               |
| DSLNT | G3         | TERM      | 8                   | 1 | 140.2                    | 140.2 | 140.2 | NA    | 140.2    | 140.2               | 140.2               |
| DSLNT | G4         | TERM      | 1                   | 1 | 697.9                    | 697.9 | 697.9 | NA    | 697.9    | 697.9               | 697.9               |
| DSLNT | G4         | TERM      | 2                   | 1 | 608.1                    | 608.1 | 608.1 | NA    | 608.1    | 608.1               | 608.1               |
| DSLNT | G4         | TERM      | 3                   | 1 | 488.2                    | 488.2 | 488.2 | NA    | 488.2    | 488.2               | 488.2               |
| DSLNT | G4         | TERM      | 4                   | 1 | 477.6                    | 477.6 | 477.6 | NA    | 477.6    | 477.6               | 477.6               |
| DSLNT | G4         | TERM      | 5                   | 1 | 360.7                    | 360.7 | 360.7 | NA    | 360.7    | 360.7               | 360.7               |
| DSLNT | G4         | TERM      | 6                   | 1 | 401.1                    | 401.1 | 401.1 | NA    | 401.1    | 401.1               | 401.1               |
| DSLNT | G4         | TERM      | 7                   | 1 | 293.1                    | 293.1 | 293.1 | NA    | 293.1    | 293.1               | 293.1               |
| DSLNT | G4         | TERM      | 8                   | 1 | 264.6                    | 264.6 | 264.6 | NA    | 264.6    | 264.6               | 264.6               |

**Table S2 Concentration of Human Milk Oligosaccharides in Term or Preterm Milk At Different Weeks Postpartum Separated By Milk Group**

\* When there are results below the method limit of quantification (LoQ) the result has been assigned value of  $0.5 \times \text{LoQ}$ , hence the minimum value appears to be the same in many cases. When a large number of datapoints are below LoQ this can also have the effect that the median = minimum.

| HMO  | Milk Group | Study Arm | Week Post Partum | N  | HMO Concentration (mg/L) |       |       |        |          |                  |                  |
|------|------------|-----------|------------------|----|--------------------------|-------|-------|--------|----------|------------------|------------------|
|      |            |           |                  |    | min *                    | max   | mean  | sd     | median * | Quartile 1 (25%) | Quartile 3 (75%) |
| LDFT | G1         | PRE-TERM  | 1                | 19 | 22.50                    | 1174  | 445.8 | 285.2  | 456.4    | 213.4            | 584.0            |
| LDFT | G1         | PRE-TERM  | 2                | 19 | 22.50                    | 759.0 | 245.8 | 190.6  | 171.6    | 115.6            | 301.3            |
| LDFT | G1         | PRE-TERM  | 3                | 19 | 22.50                    | 1926  | 340.4 | 460.1  | 197.0    | 152.0            | 261.6            |
| LDFT | G1         | PRE-TERM  | 4                | 18 | 22.50                    | 2513  | 394.0 | 555.4  | 252.2    | 153.2            | 416.8            |
| LDFT | G1         | PRE-TERM  | 5                | 19 | 22.50                    | 2072  | 376.0 | 453.4  | 286.5    | 187.8            | 356.9            |
| LDFT | G1         | PRE-TERM  | 6                | 18 | 22.50                    | 987.2 | 370.1 | 269.9  | 239.6    | 183.1            | 562.7            |
| LDFT | G1         | PRE-TERM  | 7                | 18 | 22.50                    | 2758  | 378.2 | 606.1  | 236.4    | 166.8            | 286.9            |
| LDFT | G1         | PRE-TERM  | 8                | 18 | 22.50                    | 2333  | 461.3 | 631.6  | 204.2    | 176.8            | 331.9            |
| LDFT | G1         | PRE-TERM  | 10               | 18 | 22.50                    | 1827  | 426.9 | 436.2  | 283.5    | 164.6            | 507.1            |
| LDFT | G1         | PRE-TERM  | 12               | 15 | 22.50                    | 3003  | 624.6 | 808.7  | 366.3    | 241.0            | 497.7            |
| LDFT | G1         | PRE-TERM  | 14               | 15 | 22.50                    | 1797  | 401.2 | 409.5  | 289.4    | 241.7            | 390.1            |
| LDFT | G1         | PRE-TERM  | 16               | 15 | 22.50                    | 1825  | 519.7 | 464.6  | 417.4    | 269.6            | 545.9            |
| LDFT | G1         | TERM      | 1                | 21 | 111.6                    | 983.9 | 444.1 | 256.5  | 390.4    | 287.5            | 617.8            |
| LDFT | G1         | TERM      | 2                | 19 | 76.98                    | 732.1 | 327.6 | 176.5  | 281.0    | 223.5            | 414.1            |
| LDFT | G1         | TERM      | 3                | 21 | 89.15                    | 965.0 | 331.2 | 224.1  | 315.4    | 207.6            | 337.2            |
| LDFT | G1         | TERM      | 4                | 21 | 105.9                    | 549.3 | 257.8 | 115.5  | 230.6    | 190.0            | 302.0            |
| LDFT | G1         | TERM      | 5                | 21 | 130.3                    | 1270  | 331.4 | 295.3  | 242.6    | 185.3            | 322.6            |
| LDFT | G1         | TERM      | 6                | 20 | 119.9                    | 2907  | 390.6 | 596.8  | 285.2    | 194.7            | 325.8            |
| LDFT | G1         | TERM      | 7                | 20 | 126.0                    | 1713  | 357.1 | 337.0  | 286.1    | 213.8            | 394.7            |
| LDFT | G1         | TERM      | 8                | 21 | 93.06                    | 818.6 | 317.8 | 170.9  | 301.4    | 203.2            | 381.3            |
| LDFT | G2         | PRE-TERM  | 1                | 5  | 22.50                    | 22.50 | 22.50 | 0.0000 | 22.50    | 22.50            | 22.50            |
| LDFT | G2         | PRE-TERM  | 2                | 5  | 22.50                    | 22.50 | 22.50 | 0.0000 | 22.50    | 22.50            | 22.50            |
| LDFT | G2         | PRE-TERM  | 3                | 5  | 22.50                    | 22.50 | 22.50 | 0.0000 | 22.50    | 22.50            | 22.50            |
| LDFT | G2         | PRE-TERM  | 4                | 5  | 22.50                    | 22.50 | 22.50 | 0.0000 | 22.50    | 22.50            | 22.50            |
| LDFT | G2         | PRE-TERM  | 5                | 5  | 22.50                    | 22.50 | 22.50 | 0.0000 | 22.50    | 22.50            | 22.50            |
| LDFT | G2         | PRE-TERM  | 6                | 5  | 22.50                    | 22.50 | 22.50 | 0.0000 | 22.50    | 22.50            | 22.50            |
| LDFT | G2         | PRE-TERM  | 7                | 5  | 22.50                    | 22.50 | 22.50 | 0.0000 | 22.50    | 22.50            | 22.50            |
| LDFT | G2         | PRE-TERM  | 8                | 5  | 22.50                    | 22.50 | 22.50 | 0.0000 | 22.50    | 22.50            | 22.50            |
| LDFT | G2         | PRE-TERM  | 10               | 4  | 22.50                    | 22.50 | 22.50 | 0.0000 | 22.50    | 22.50            | 22.50            |
| LDFT | G2         | PRE-TERM  | 12               | 5  | 22.50                    | 22.50 | 22.50 | 0.0000 | 22.50    | 22.50            | 22.50            |
| LDFT | G2         | PRE-TERM  | 14               | 5  | 22.50                    | 22.50 | 22.50 | 0.0000 | 22.50    | 22.50            | 22.50            |
| LDFT | G2         | PRE-TERM  | 16               | 3  | 22.50                    | 22.50 | 22.50 | 0.0000 | 22.50    | 22.50            | 22.50            |
| LDFT | G2         | TERM      | 1                | 5  | 22.50                    | 22.50 | 22.50 | 0.0000 | 22.50    | 22.50            | 22.50            |
| LDFT | G2         | TERM      | 2                | 5  | 22.50                    | 22.50 | 22.50 | 0.0000 | 22.50    | 22.50            | 22.50            |

**Table S2 Concentration of Human Milk Oligosaccharides in Term or Preterm Milk At Different Weeks Postpartum Separated By Milk Group**

*\* When there are results below the method limit of quantification (LoQ) the result has been assigned value of  $0.5 \times \text{LoQ}$ , hence the minimum value appears to be the same in many cases. When a large number of datapoints are below LoQ this can also have the effect that the median = minimum.*

| HMO  | Milk Group | Study Arm | Week Post Partum | N | HMO Concentration (mg/L) |       |       |        |          |                  |                  |
|------|------------|-----------|------------------|---|--------------------------|-------|-------|--------|----------|------------------|------------------|
|      |            |           |                  |   | min *                    | max   | mean  | sd     | median * | Quartile 1 (25%) | Quartile 3 (75%) |
| LDFT | G2         | TERM      | 3                | 5 | 22.50                    | 22.50 | 22.50 | 0.0000 | 22.50    | 22.50            | 22.50            |
| LDFT | G2         | TERM      | 4                | 5 | 22.50                    | 22.50 | 22.50 | 0.0000 | 22.50    | 22.50            | 22.50            |
| LDFT | G2         | TERM      | 5                | 5 | 22.50                    | 22.50 | 22.50 | 0.0000 | 22.50    | 22.50            | 22.50            |
| LDFT | G2         | TERM      | 6                | 5 | 22.50                    | 22.50 | 22.50 | 0.0000 | 22.50    | 22.50            | 22.50            |
| LDFT | G2         | TERM      | 7                | 5 | 22.50                    | 22.50 | 22.50 | 0.0000 | 22.50    | 22.50            | 22.50            |
| LDFT | G2         | TERM      | 8                | 5 | 22.50                    | 22.50 | 22.50 | 0.0000 | 22.50    | 22.50            | 22.50            |
| LDFT | G3         | PRE-TERM  | 1                | 1 | 56.66                    | 56.66 | 56.66 | NA     | 56.66    | 56.66            | 56.66            |
| LDFT | G3         | PRE-TERM  | 2                | 1 | 265.3                    | 265.3 | 265.3 | NA     | 265.3    | 265.3            | 265.3            |
| LDFT | G3         | PRE-TERM  | 3                | 1 | 135.2                    | 135.2 | 135.2 | NA     | 135.2    | 135.2            | 135.2            |
| LDFT | G3         | PRE-TERM  | 4                | 1 | 63.09                    | 63.09 | 63.09 | NA     | 63.09    | 63.09            | 63.09            |
| LDFT | G3         | PRE-TERM  | 5                | 1 | 91.93                    | 91.93 | 91.93 | NA     | 91.93    | 91.93            | 91.93            |
| LDFT | G3         | PRE-TERM  | 6                | 1 | 95.15                    | 95.15 | 95.15 | NA     | 95.15    | 95.15            | 95.15            |
| LDFT | G3         | PRE-TERM  | 7                | 1 | 77.50                    | 77.50 | 77.50 | NA     | 77.50    | 77.50            | 77.50            |
| LDFT | G3         | PRE-TERM  | 8                | 1 | 77.28                    | 77.28 | 77.28 | NA     | 77.28    | 77.28            | 77.28            |
| LDFT | G3         | PRE-TERM  | 10               | 1 | 76.44                    | 76.44 | 76.44 | NA     | 76.44    | 76.44            | 76.44            |
| LDFT | G3         | PRE-TERM  | 12               | 1 | 76.41                    | 76.41 | 76.41 | NA     | 76.41    | 76.41            | 76.41            |
| LDFT | G3         | PRE-TERM  | 14               | 1 | 91.69                    | 91.69 | 91.69 | NA     | 91.69    | 91.69            | 91.69            |
| LDFT | G3         | PRE-TERM  | 16               | 1 | 103.7                    | 103.7 | 103.7 | NA     | 103.7    | 103.7            | 103.7            |
| LDFT | G3         | TERM      | 1                | 1 | 71.16                    | 71.16 | 71.16 | NA     | 71.16    | 71.16            | 71.16            |
| LDFT | G3         | TERM      | 2                | 1 | 273.5                    | 273.5 | 273.5 | NA     | 273.5    | 273.5            | 273.5            |
| LDFT | G3         | TERM      | 3                | 1 | 136.6                    | 136.6 | 136.6 | NA     | 136.6    | 136.6            | 136.6            |
| LDFT | G3         | TERM      | 4                | 1 | 119.3                    | 119.3 | 119.3 | NA     | 119.3    | 119.3            | 119.3            |
| LDFT | G3         | TERM      | 5                | 1 | 61.93                    | 61.93 | 61.93 | NA     | 61.93    | 61.93            | 61.93            |
| LDFT | G3         | TERM      | 6                | 1 | 111.5                    | 111.5 | 111.5 | NA     | 111.5    | 111.5            | 111.5            |
| LDFT | G3         | TERM      | 7                | 1 | 68.95                    | 68.95 | 68.95 | NA     | 68.95    | 68.95            | 68.95            |
| LDFT | G3         | TERM      | 8                | 1 | 143.8                    | 143.8 | 143.8 | NA     | 143.8    | 143.8            | 143.8            |
| LDFT | G4         | TERM      | 1                | 1 | 22.50                    | 22.50 | 22.50 | NA     | 22.50    | 22.50            | 22.50            |
| LDFT | G4         | TERM      | 2                | 1 | 22.50                    | 22.50 | 22.50 | NA     | 22.50    | 22.50            | 22.50            |
| LDFT | G4         | TERM      | 3                | 1 | 22.50                    | 22.50 | 22.50 | NA     | 22.50    | 22.50            | 22.50            |
| LDFT | G4         | TERM      | 4                | 1 | 22.50                    | 22.50 | 22.50 | NA     | 22.50    | 22.50            | 22.50            |
| LDFT | G4         | TERM      | 5                | 1 | 22.50                    | 22.50 | 22.50 | NA     | 22.50    | 22.50            | 22.50            |
| LDFT | G4         | TERM      | 6                | 1 | 22.50                    | 22.50 | 22.50 | NA     | 22.50    | 22.50            | 22.50            |
| LDFT | G4         | TERM      | 7                | 1 | 22.50                    | 22.50 | 22.50 | NA     | 22.50    | 22.50            | 22.50            |
| LDFT | G4         | TERM      | 8                | 1 | 22.50                    | 22.50 | 22.50 | NA     | 22.50    | 22.50            | 22.50            |

**Table S2 Concentration of Human Milk Oligosaccharides in Term or Preterm Milk At Different Weeks Postpartum Separated By Milk Group**

\* When there are results below the method limit of quantification (LoQ) the result has been assigned value of  $0.5 \times \text{LoQ}$ , hence the minimum value appears to be the same in many cases. When a large number of datapoints are below LoQ this can also have the effect that the median = minimum.

| HMO     | Milk Group | Study Arm | Week Post Partum | N  | HMO Concentration (mg/L) |       |       |        |          |                  |                  |
|---------|------------|-----------|------------------|----|--------------------------|-------|-------|--------|----------|------------------|------------------|
|         |            |           |                  |    | min *                    | max   | mean  | sd     | median * | Quartile 1 (25%) | Quartile 3 (75%) |
| LNDFH-I | G1         | PRE-TERM  | 1                | 19 | 81.36                    | 1781  | 1276  | 427.3  | 1263     | 1063             | 1611             |
| LNDFH-I | G1         | PRE-TERM  | 2                | 19 | 75.44                    | 1629  | 1058  | 375.6  | 1145     | 816.6            | 1299             |
| LNDFH-I | G1         | PRE-TERM  | 3                | 19 | 49.54                    | 2269  | 1140  | 502.0  | 1047     | 865.0            | 1535             |
| LNDFH-I | G1         | PRE-TERM  | 4                | 18 | 40.53                    | 3123  | 1159  | 643.6  | 961.2    | 870.4            | 1370             |
| LNDFH-I | G1         | PRE-TERM  | 5                | 19 | 41.75                    | 3161  | 1192  | 651.0  | 1025     | 898.2            | 1512             |
| LNDFH-I | G1         | PRE-TERM  | 6                | 18 | 39.25                    | 1624  | 1046  | 426.8  | 1051     | 816.4            | 1447             |
| LNDFH-I | G1         | PRE-TERM  | 7                | 18 | 36.61                    | 1500  | 1006  | 364.2  | 1032     | 823.3            | 1260             |
| LNDFH-I | G1         | PRE-TERM  | 8                | 18 | 31.86                    | 1910  | 1061  | 440.1  | 993.8    | 847.6            | 1226             |
| LNDFH-I | G1         | PRE-TERM  | 10               | 18 | 22.31                    | 1663  | 970.8 | 378.4  | 927.2    | 777.2            | 1134             |
| LNDFH-I | G1         | PRE-TERM  | 12               | 15 | 18.66                    | 1606  | 976.5 | 424.9  | 910.9    | 736.8            | 1272             |
| LNDFH-I | G1         | PRE-TERM  | 14               | 15 | 33.59                    | 1768  | 888.4 | 393.7  | 887.0    | 629.6            | 1091             |
| LNDFH-I | G1         | PRE-TERM  | 16               | 15 | 34.15                    | 1431  | 818.0 | 343.6  | 845.7    | 598.1            | 987.1            |
| LNDFH-I | G1         | TERM      | 1                | 21 | 825.9                    | 2122  | 1256  | 405.9  | 1106     | 947.1            | 1565             |
| LNDFH-I | G1         | TERM      | 2                | 19 | 816.4                    | 2264  | 1349  | 420.1  | 1220     | 1016             | 1638             |
| LNDFH-I | G1         | TERM      | 3                | 21 | 699.4                    | 2313  | 1365  | 419.9  | 1380     | 1063             | 1649             |
| LNDFH-I | G1         | TERM      | 4                | 21 | 542.0                    | 1937  | 1215  | 366.3  | 1246     | 1040             | 1367             |
| LNDFH-I | G1         | TERM      | 5                | 21 | 464.2                    | 1838  | 1120  | 391.9  | 1146     | 827.0            | 1334             |
| LNDFH-I | G1         | TERM      | 6                | 20 | 458.7                    | 2024  | 1113  | 430.6  | 1106     | 786.6            | 1313             |
| LNDFH-I | G1         | TERM      | 7                | 20 | 384.5                    | 2167  | 1068  | 433.3  | 1036     | 773.2            | 1314             |
| LNDFH-I | G1         | TERM      | 8                | 21 | 5.000                    | 1935  | 890.6 | 448.2  | 851.2    | 649.6            | 1064             |
| LNDFH-I | G2         | PRE-TERM  | 1                | 5  | 5.000                    | 115.7 | 27.14 | 49.51  | 5.000    | 5.000            | 5.000            |
| LNDFH-I | G2         | PRE-TERM  | 2                | 5  | 5.000                    | 65.99 | 17.20 | 27.27  | 5.000    | 5.000            | 5.000            |
| LNDFH-I | G2         | PRE-TERM  | 3                | 5  | 5.000                    | 56.94 | 15.39 | 23.23  | 5.000    | 5.000            | 5.000            |
| LNDFH-I | G2         | PRE-TERM  | 4                | 5  | 5.000                    | 22.95 | 8.589 | 8.025  | 5.000    | 5.000            | 5.000            |
| LNDFH-I | G2         | PRE-TERM  | 5                | 5  | 5.000                    | 24.70 | 8.940 | 8.810  | 5.000    | 5.000            | 5.000            |
| LNDFH-I | G2         | PRE-TERM  | 6                | 5  | 5.000                    | 22.52 | 8.505 | 7.836  | 5.000    | 5.000            | 5.000            |
| LNDFH-I | G2         | PRE-TERM  | 7                | 5  | 5.000                    | 22.32 | 8.464 | 7.746  | 5.000    | 5.000            | 5.000            |
| LNDFH-I | G2         | PRE-TERM  | 8                | 5  | 5.000                    | 21.68 | 8.336 | 7.460  | 5.000    | 5.000            | 5.000            |
| LNDFH-I | G2         | PRE-TERM  | 10               | 4  | 5.000                    | 15.92 | 7.731 | 5.462  | 5.000    | 5.000            | 7.731            |
| LNDFH-I | G2         | PRE-TERM  | 12               | 5  | 5.000                    | 14.75 | 6.949 | 4.359  | 5.000    | 5.000            | 5.000            |
| LNDFH-I | G2         | PRE-TERM  | 14               | 5  | 5.000                    | 14.03 | 6.806 | 4.039  | 5.000    | 5.000            | 5.000            |
| LNDFH-I | G2         | PRE-TERM  | 16               | 3  | 5.000                    | 11.93 | 7.311 | 4.002  | 5.000    | 5.000            | 8.466            |
| LNDFH-I | G2         | TERM      | 1                | 5  | 5.000                    | 5.000 | 5.000 | 0.0000 | 5.000    | 5.000            | 5.000            |
| LNDFH-I | G2         | TERM      | 2                | 5  | 5.000                    | 5.000 | 5.000 | 0.0000 | 5.000    | 5.000            | 5.000            |

**Table S2 Concentration of Human Milk Oligosaccharides in Term or Preterm Milk At Different Weeks Postpartum Separated By Milk Group**

*\* When there are results below the method limit of quantification (LoQ) the result has been assigned value of  $0.5 \times \text{LoQ}$ , hence the minimum value appears to be the same in many cases. When a large number of datapoints are below LoQ this can also have the effect that the median = minimum.*

| HMO     | Milk Group | Study Arm | Week Post Partum | N | HMO Concentration (mg/L) |       |       |        |          |                  |                  |
|---------|------------|-----------|------------------|---|--------------------------|-------|-------|--------|----------|------------------|------------------|
|         |            |           |                  |   | min *                    | max   | mean  | sd     | median * | Quartile 1 (25%) | Quartile 3 (75%) |
| LNDFH-I | G2         | TERM      | 3                | 5 | 5.000                    | 5.000 | 5.000 | 0.0000 | 5.000    | 5.000            | 5.000            |
| LNDFH-I | G2         | TERM      | 4                | 5 | 5.000                    | 15.85 | 7.171 | 4.853  | 5.000    | 5.000            | 5.000            |
| LNDFH-I | G2         | TERM      | 5                | 5 | 5.000                    | 11.89 | 6.378 | 3.082  | 5.000    | 5.000            | 5.000            |
| LNDFH-I | G2         | TERM      | 6                | 5 | 5.000                    | 5.000 | 5.000 | 0.0000 | 5.000    | 5.000            | 5.000            |
| LNDFH-I | G2         | TERM      | 7                | 5 | 5.000                    | 5.000 | 5.000 | 0.0000 | 5.000    | 5.000            | 5.000            |
| LNDFH-I | G2         | TERM      | 8                | 5 | 5.000                    | 5.000 | 5.000 | 0.0000 | 5.000    | 5.000            | 5.000            |
| LNDFH-I | G3         | PRE-TERM  | 1                | 1 | 5.000                    | 5.000 | 5.000 | NA     | 5.000    | 5.000            | 5.000            |
| LNDFH-I | G3         | PRE-TERM  | 2                | 1 | 5.000                    | 5.000 | 5.000 | NA     | 5.000    | 5.000            | 5.000            |
| LNDFH-I | G3         | PRE-TERM  | 3                | 1 | 5.000                    | 5.000 | 5.000 | NA     | 5.000    | 5.000            | 5.000            |
| LNDFH-I | G3         | PRE-TERM  | 4                | 1 | 5.000                    | 5.000 | 5.000 | NA     | 5.000    | 5.000            | 5.000            |
| LNDFH-I | G3         | PRE-TERM  | 5                | 1 | 5.000                    | 5.000 | 5.000 | NA     | 5.000    | 5.000            | 5.000            |
| LNDFH-I | G3         | PRE-TERM  | 6                | 1 | 5.000                    | 5.000 | 5.000 | NA     | 5.000    | 5.000            | 5.000            |
| LNDFH-I | G3         | PRE-TERM  | 7                | 1 | 5.000                    | 5.000 | 5.000 | NA     | 5.000    | 5.000            | 5.000            |
| LNDFH-I | G3         | PRE-TERM  | 8                | 1 | 5.000                    | 5.000 | 5.000 | NA     | 5.000    | 5.000            | 5.000            |
| LNDFH-I | G3         | PRE-TERM  | 10               | 1 | 5.000                    | 5.000 | 5.000 | NA     | 5.000    | 5.000            | 5.000            |
| LNDFH-I | G3         | PRE-TERM  | 12               | 1 | 5.000                    | 5.000 | 5.000 | NA     | 5.000    | 5.000            | 5.000            |
| LNDFH-I | G3         | PRE-TERM  | 14               | 1 | 5.000                    | 5.000 | 5.000 | NA     | 5.000    | 5.000            | 5.000            |
| LNDFH-I | G3         | PRE-TERM  | 16               | 1 | 5.000                    | 5.000 | 5.000 | NA     | 5.000    | 5.000            | 5.000            |
| LNDFH-I | G3         | TERM      | 1                | 1 | 5.000                    | 5.000 | 5.000 | NA     | 5.000    | 5.000            | 5.000            |
| LNDFH-I | G3         | TERM      | 2                | 1 | 5.000                    | 5.000 | 5.000 | NA     | 5.000    | 5.000            | 5.000            |
| LNDFH-I | G3         | TERM      | 3                | 1 | 5.000                    | 5.000 | 5.000 | NA     | 5.000    | 5.000            | 5.000            |
| LNDFH-I | G3         | TERM      | 4                | 1 | 5.000                    | 5.000 | 5.000 | NA     | 5.000    | 5.000            | 5.000            |
| LNDFH-I | G3         | TERM      | 5                | 1 | 5.000                    | 5.000 | 5.000 | NA     | 5.000    | 5.000            | 5.000            |
| LNDFH-I | G3         | TERM      | 6                | 1 | 5.000                    | 5.000 | 5.000 | NA     | 5.000    | 5.000            | 5.000            |
| LNDFH-I | G3         | TERM      | 7                | 1 | 5.000                    | 5.000 | 5.000 | NA     | 5.000    | 5.000            | 5.000            |
| LNDFH-I | G3         | TERM      | 8                | 1 | 5.000                    | 5.000 | 5.000 | NA     | 5.000    | 5.000            | 5.000            |
| LNDFH-I | G4         | TERM      | 1                | 1 | 5.000                    | 5.000 | 5.000 | NA     | 5.000    | 5.000            | 5.000            |
| LNDFH-I | G4         | TERM      | 2                | 1 | 5.000                    | 5.000 | 5.000 | NA     | 5.000    | 5.000            | 5.000            |
| LNDFH-I | G4         | TERM      | 3                | 1 | 5.000                    | 5.000 | 5.000 | NA     | 5.000    | 5.000            | 5.000            |
| LNDFH-I | G4         | TERM      | 4                | 1 | 5.000                    | 5.000 | 5.000 | NA     | 5.000    | 5.000            | 5.000            |
| LNDFH-I | G4         | TERM      | 5                | 1 | 5.000                    | 5.000 | 5.000 | NA     | 5.000    | 5.000            | 5.000            |
| LNDFH-I | G4         | TERM      | 6                | 1 | 5.000                    | 5.000 | 5.000 | NA     | 5.000    | 5.000            | 5.000            |
| LNDFH-I | G4         | TERM      | 7                | 1 | 5.000                    | 5.000 | 5.000 | NA     | 5.000    | 5.000            | 5.000            |
| LNDFH-I | G4         | TERM      | 8                | 1 | 5.000                    | 5.000 | 5.000 | NA     | 5.000    | 5.000            | 5.000            |

**Table S2 Concentration of Human Milk Oligosaccharides in Term or Preterm Milk At Different Weeks Postpartum Separated By Milk Group**

\* When there are results below the method limit of quantification (LoQ) the result has been assigned value of  $0.5 \times \text{LoQ}$ , hence the minimum value appears to be the same in many cases. When a large number of datapoints are below LoQ this can also have the effect that the median = minimum.

| HMO    | Milk Group | Study Arm | Week Post Partum | N  | HMO Concentration (mg/L) |       |       |        |          |                  |                  |
|--------|------------|-----------|------------------|----|--------------------------|-------|-------|--------|----------|------------------|------------------|
|        |            |           |                  |    | min *                    | max   | mean  | sd     | median * | Quartile 1 (25%) | Quartile 3 (75%) |
| LNFP-I | G1         | PRE-TERM  | 1                | 19 | 13.50                    | 2806  | 1617  | 672.0  | 1661     | 1282             | 2016             |
| LNFP-I | G1         | PRE-TERM  | 2                | 19 | 13.50                    | 1949  | 1172  | 451.3  | 1203     | 937.4            | 1449             |
| LNFP-I | G1         | PRE-TERM  | 3                | 19 | 13.50                    | 1634  | 1034  | 404.5  | 1085     | 727.2            | 1358             |
| LNFP-I | G1         | PRE-TERM  | 4                | 18 | 13.50                    | 1549  | 897.8 | 347.8  | 937.5    | 673.4            | 1063             |
| LNFP-I | G1         | PRE-TERM  | 5                | 19 | 13.50                    | 1443  | 837.2 | 374.3  | 780.4    | 604.2            | 1140             |
| LNFP-I | G1         | PRE-TERM  | 6                | 18 | 13.50                    | 1840  | 755.9 | 403.8  | 693.0    | 576.3            | 953.7            |
| LNFP-I | G1         | PRE-TERM  | 7                | 18 | 13.50                    | 1773  | 701.0 | 382.7  | 619.3    | 496.0            | 862.9            |
| LNFP-I | G1         | PRE-TERM  | 8                | 18 | 13.50                    | 1123  | 648.6 | 279.0  | 596.5    | 463.7            | 832.2            |
| LNFP-I | G1         | PRE-TERM  | 10               | 18 | 13.50                    | 1436  | 547.2 | 296.7  | 484.2    | 385.0            | 660.6            |
| LNFP-I | G1         | PRE-TERM  | 12               | 15 | 13.50                    | 966.6 | 441.9 | 263.5  | 404.8    | 259.1            | 540.9            |
| LNFP-I | G1         | PRE-TERM  | 14               | 15 | 13.50                    | 1014  | 447.6 | 272.8  | 393.4    | 287.2            | 622.3            |
| LNFP-I | G1         | PRE-TERM  | 16               | 15 | 13.50                    | 933.6 | 368.2 | 256.2  | 299.3    | 181.3            | 540.5            |
| LNFP-I | G1         | TERM      | 1                | 21 | 685.4                    | 3597  | 2207  | 750.6  | 2218     | 1768             | 2618             |
| LNFP-I | G1         | TERM      | 2                | 19 | 505.8                    | 3073  | 1704  | 667.2  | 1613     | 1291             | 1926             |
| LNFP-I | G1         | TERM      | 3                | 21 | 492.7                    | 3018  | 1518  | 649.8  | 1369     | 1055             | 1841             |
| LNFP-I | G1         | TERM      | 4                | 21 | 418.7                    | 3156  | 1325  | 686.4  | 1198     | 831.7            | 1715             |
| LNFP-I | G1         | TERM      | 5                | 21 | 290.2                    | 2655  | 1003  | 532.7  | 942.2    | 710.6            | 1138             |
| LNFP-I | G1         | TERM      | 6                | 20 | 231.4                    | 2045  | 841.2 | 400.2  | 760.5    | 682.3            | 942.5            |
| LNFP-I | G1         | TERM      | 7                | 20 | 168.8                    | 2617  | 796.7 | 542.2  | 702.6    | 547.6            | 805.5            |
| LNFP-I | G1         | TERM      | 8                | 21 | 192.0                    | 1956  | 688.9 | 456.6  | 530.6    | 416.9            | 834.1            |
| LNFP-I | G2         | PRE-TERM  | 1                | 5  | 13.50                    | 13.50 | 13.50 | 0.0000 | 13.50    | 13.50            | 13.50            |
| LNFP-I | G2         | PRE-TERM  | 2                | 5  | 13.50                    | 13.50 | 13.50 | 0.0000 | 13.50    | 13.50            | 13.50            |
| LNFP-I | G2         | PRE-TERM  | 3                | 5  | 13.50                    | 13.50 | 13.50 | 0.0000 | 13.50    | 13.50            | 13.50            |
| LNFP-I | G2         | PRE-TERM  | 4                | 5  | 13.50                    | 13.50 | 13.50 | 0.0000 | 13.50    | 13.50            | 13.50            |
| LNFP-I | G2         | PRE-TERM  | 5                | 5  | 13.50                    | 13.50 | 13.50 | 0.0000 | 13.50    | 13.50            | 13.50            |
| LNFP-I | G2         | PRE-TERM  | 6                | 5  | 13.50                    | 13.50 | 13.50 | 0.0000 | 13.50    | 13.50            | 13.50            |
| LNFP-I | G2         | PRE-TERM  | 7                | 5  | 13.50                    | 13.50 | 13.50 | 0.0000 | 13.50    | 13.50            | 13.50            |
| LNFP-I | G2         | PRE-TERM  | 8                | 5  | 13.50                    | 13.50 | 13.50 | 0.0000 | 13.50    | 13.50            | 13.50            |
| LNFP-I | G2         | PRE-TERM  | 10               | 4  | 13.50                    | 13.50 | 13.50 | 0.0000 | 13.50    | 13.50            | 13.50            |
| LNFP-I | G2         | PRE-TERM  | 12               | 5  | 13.50                    | 13.50 | 13.50 | 0.0000 | 13.50    | 13.50            | 13.50            |
| LNFP-I | G2         | PRE-TERM  | 14               | 5  | 13.50                    | 13.50 | 13.50 | 0.0000 | 13.50    | 13.50            | 13.50            |
| LNFP-I | G2         | PRE-TERM  | 16               | 3  | 13.50                    | 13.50 | 13.50 | 0.0000 | 13.50    | 13.50            | 13.50            |
| LNFP-I | G2         | TERM      | 1                | 5  | 13.50                    | 13.50 | 13.50 | 0.0000 | 13.50    | 13.50            | 13.50            |
| LNFP-I | G2         | TERM      | 2                | 5  | 13.50                    | 13.50 | 13.50 | 0.0000 | 13.50    | 13.50            | 13.50            |

**Table S2 Concentration of Human Milk Oligosaccharides in Term or Preterm Milk At Different Weeks Postpartum Separated By Milk Group**

*\* When there are results below the method limit of quantification (LoQ) the result has been assigned value of  $0.5 \times \text{LoQ}$ , hence the minimum value appears to be the same in many cases. When a large number of datapoints are below LoQ this can also have the effect that the median = minimum.*

| HMO    | Milk Group | Study Arm | Week Post Partum | N | HMO Concentration (mg/L) |       |       |        |          |                  |                  |
|--------|------------|-----------|------------------|---|--------------------------|-------|-------|--------|----------|------------------|------------------|
|        |            |           |                  |   | min *                    | max   | mean  | sd     | median * | Quartile 1 (25%) | Quartile 3 (75%) |
| LNFP-I | G2         | TERM      | 3                | 5 | 13.50                    | 13.50 | 13.50 | 0.0000 | 13.50    | 13.50            | 13.50            |
| LNFP-I | G2         | TERM      | 4                | 5 | 13.50                    | 13.50 | 13.50 | 0.0000 | 13.50    | 13.50            | 13.50            |
| LNFP-I | G2         | TERM      | 5                | 5 | 13.50                    | 13.50 | 13.50 | 0.0000 | 13.50    | 13.50            | 13.50            |
| LNFP-I | G2         | TERM      | 6                | 5 | 13.50                    | 13.50 | 13.50 | 0.0000 | 13.50    | 13.50            | 13.50            |
| LNFP-I | G2         | TERM      | 7                | 5 | 13.50                    | 13.50 | 13.50 | 0.0000 | 13.50    | 13.50            | 13.50            |
| LNFP-I | G2         | TERM      | 8                | 5 | 13.50                    | 13.50 | 13.50 | 0.0000 | 13.50    | 13.50            | 13.50            |
| LNFP-I | G3         | PRE-TERM  | 1                | 1 | 2639                     | 2639  | 2639  | NA     | 2639     | 2639             | 2639             |
| LNFP-I | G3         | PRE-TERM  | 2                | 1 | 2195                     | 2195  | 2195  | NA     | 2195     | 2195             | 2195             |
| LNFP-I | G3         | PRE-TERM  | 3                | 1 | 2178                     | 2178  | 2178  | NA     | 2178     | 2178             | 2178             |
| LNFP-I | G3         | PRE-TERM  | 4                | 1 | 2062                     | 2062  | 2062  | NA     | 2062     | 2062             | 2062             |
| LNFP-I | G3         | PRE-TERM  | 5                | 1 | 1624                     | 1624  | 1624  | NA     | 1624     | 1624             | 1624             |
| LNFP-I | G3         | PRE-TERM  | 6                | 1 | 1332                     | 1332  | 1332  | NA     | 1332     | 1332             | 1332             |
| LNFP-I | G3         | PRE-TERM  | 7                | 1 | 949.2                    | 949.2 | 949.2 | NA     | 949.2    | 949.2            | 949.2            |
| LNFP-I | G3         | PRE-TERM  | 8                | 1 | 960.9                    | 960.9 | 960.9 | NA     | 960.9    | 960.9            | 960.9            |
| LNFP-I | G3         | PRE-TERM  | 10               | 1 | 807.3                    | 807.3 | 807.3 | NA     | 807.3    | 807.3            | 807.3            |
| LNFP-I | G3         | PRE-TERM  | 12               | 1 | 829.3                    | 829.3 | 829.3 | NA     | 829.3    | 829.3            | 829.3            |
| LNFP-I | G3         | PRE-TERM  | 14               | 1 | 829.0                    | 829.0 | 829.0 | NA     | 829.0    | 829.0            | 829.0            |
| LNFP-I | G3         | PRE-TERM  | 16               | 1 | 784.9                    | 784.9 | 784.9 | NA     | 784.9    | 784.9            | 784.9            |
| LNFP-I | G3         | TERM      | 1                | 1 | 2392                     | 2392  | 2392  | NA     | 2392     | 2392             | 2392             |
| LNFP-I | G3         | TERM      | 2                | 1 | 1768                     | 1768  | 1768  | NA     | 1768     | 1768             | 1768             |
| LNFP-I | G3         | TERM      | 3                | 1 | 2027                     | 2027  | 2027  | NA     | 2027     | 2027             | 2027             |
| LNFP-I | G3         | TERM      | 4                | 1 | 1812                     | 1812  | 1812  | NA     | 1812     | 1812             | 1812             |
| LNFP-I | G3         | TERM      | 5                | 1 | 1850                     | 1850  | 1850  | NA     | 1850     | 1850             | 1850             |
| LNFP-I | G3         | TERM      | 6                | 1 | 1480                     | 1480  | 1480  | NA     | 1480     | 1480             | 1480             |
| LNFP-I | G3         | TERM      | 7                | 1 | 1320                     | 1320  | 1320  | NA     | 1320     | 1320             | 1320             |
| LNFP-I | G3         | TERM      | 8                | 1 | 1180                     | 1180  | 1180  | NA     | 1180     | 1180             | 1180             |
| LNFP-I | G4         | TERM      | 1                | 1 | 13.50                    | 13.50 | 13.50 | NA     | 13.50    | 13.50            | 13.50            |
| LNFP-I | G4         | TERM      | 2                | 1 | 13.50                    | 13.50 | 13.50 | NA     | 13.50    | 13.50            | 13.50            |
| LNFP-I | G4         | TERM      | 3                | 1 | 13.50                    | 13.50 | 13.50 | NA     | 13.50    | 13.50            | 13.50            |
| LNFP-I | G4         | TERM      | 4                | 1 | 13.50                    | 13.50 | 13.50 | NA     | 13.50    | 13.50            | 13.50            |
| LNFP-I | G4         | TERM      | 5                | 1 | 13.50                    | 13.50 | 13.50 | NA     | 13.50    | 13.50            | 13.50            |
| LNFP-I | G4         | TERM      | 6                | 1 | 13.50                    | 13.50 | 13.50 | NA     | 13.50    | 13.50            | 13.50            |
| LNFP-I | G4         | TERM      | 7                | 1 | 13.50                    | 13.50 | 13.50 | NA     | 13.50    | 13.50            | 13.50            |
| LNFP-I | G4         | TERM      | 8                | 1 | 13.50                    | 13.50 | 13.50 | NA     | 13.50    | 13.50            | 13.50            |



**Table S2 Concentration of Human Milk Oligosaccharides in Term or Preterm Milk At Different Weeks Postpartum Separated By Milk Group**

\* When there are results below the method limit of quantification (LoQ) the result has been assigned value of  $0.5 \times \text{LoQ}$ , hence the minimum value appears to be the same in many cases. When a large number of datapoints are below LoQ this can also have the effect that the median = minimum.

| HMO     | Milk Group | Study Arm | Week Post Partum | N  | HMO Concentration (mg/L) |       |       |       |          |                  |                  |
|---------|------------|-----------|------------------|----|--------------------------|-------|-------|-------|----------|------------------|------------------|
|         |            |           |                  |    | min *                    | max   | mean  | sd    | median * | Quartile 1 (25%) | Quartile 3 (75%) |
| LNFP-II | G1         | PRE-TERM  | 1                | 19 | 95.46                    | 1108  | 293.7 | 248.1 | 189.9    | 135.4            | 383.2            |
| LNFP-II | G1         | PRE-TERM  | 2                | 19 | 136.4                    | 1108  | 379.6 | 261.9 | 293.7    | 188.3            | 487.4            |
| LNFP-II | G1         | PRE-TERM  | 3                | 19 | 135.6                    | 975.6 | 407.0 | 246.7 | 327.7    | 226.2            | 559.4            |
| LNFP-II | G1         | PRE-TERM  | 4                | 18 | 122.1                    | 918.9 | 405.9 | 240.6 | 325.1    | 225.1            | 545.1            |
| LNFP-II | G1         | PRE-TERM  | 5                | 19 | 138.0                    | 865.6 | 410.7 | 227.8 | 389.4    | 211.6            | 556.6            |
| LNFP-II | G1         | PRE-TERM  | 6                | 18 | 68.91                    | 946.4 | 378.0 | 254.2 | 330.9    | 171.4            | 521.7            |
| LNFP-II | G1         | PRE-TERM  | 7                | 18 | 128.1                    | 982.3 | 432.1 | 270.2 | 367.5    | 175.7            | 545.8            |
| LNFP-II | G1         | PRE-TERM  | 8                | 18 | 146.0                    | 911.4 | 414.8 | 252.8 | 353.4    | 210.9            | 516.4            |
| LNFP-II | G1         | PRE-TERM  | 10               | 18 | 92.35                    | 760.4 | 382.7 | 219.2 | 307.0    | 213.2            | 533.1            |
| LNFP-II | G1         | PRE-TERM  | 12               | 15 | 132.9                    | 688.8 | 396.3 | 185.6 | 416.9    | 224.7            | 548.1            |
| LNFP-II | G1         | PRE-TERM  | 14               | 15 | 121.9                    | 754.0 | 388.4 | 198.0 | 369.5    | 232.4            | 503.6            |
| LNFP-II | G1         | PRE-TERM  | 16               | 15 | 118.0                    | 1014  | 362.4 | 230.6 | 302.2    | 218.0            | 398.9            |
| LNFP-II | G1         | TERM      | 1                | 21 | 55.63                    | 1204  | 245.0 | 235.3 | 222.1    | 122.8            | 266.2            |
| LNFP-II | G1         | TERM      | 2                | 19 | 137.2                    | 640.6 | 333.2 | 156.0 | 311.2    | 217.0            | 416.4            |
| LNFP-II | G1         | TERM      | 3                | 21 | 147.7                    | 686.4 | 341.6 | 168.9 | 308.5    | 221.8            | 394.7            |
| LNFP-II | G1         | TERM      | 4                | 21 | 127.0                    | 1531  | 400.8 | 303.5 | 327.6    | 244.3            | 458.3            |
| LNFP-II | G1         | TERM      | 5                | 21 | 137.6                    | 718.3 | 325.7 | 166.2 | 289.6    | 186.1            | 431.9            |
| LNFP-II | G1         | TERM      | 6                | 20 | 109.8                    | 824.7 | 344.6 | 190.6 | 304.1    | 199.9            | 422.2            |
| LNFP-II | G1         | TERM      | 7                | 20 | 126.2                    | 846.5 | 348.6 | 201.2 | 290.9    | 203.2            | 429.4            |
| LNFP-II | G1         | TERM      | 8                | 21 | 96.47                    | 854.5 | 311.1 | 200.1 | 272.1    | 173.9            | 382.2            |
| LNFP-II | G2         | PRE-TERM  | 1                | 5  | 1328                     | 2094  | 1593  | 314.1 | 1435     | 1402             | 1703             |
| LNFP-II | G2         | PRE-TERM  | 2                | 5  | 1006                     | 1950  | 1634  | 370.7 | 1740     | 1628             | 1845             |
| LNFP-II | G2         | PRE-TERM  | 3                | 5  | 947.4                    | 1922  | 1579  | 382.0 | 1736     | 1514             | 1775             |
| LNFP-II | G2         | PRE-TERM  | 4                | 5  | 930.8                    | 2220  | 1512  | 528.0 | 1667     | 1044             | 1696             |
| LNFP-II | G2         | PRE-TERM  | 5                | 5  | 897.4                    | 1775  | 1366  | 383.2 | 1537     | 1023             | 1597             |
| LNFP-II | G2         | PRE-TERM  | 6                | 5  | 791.2                    | 2138  | 1528  | 584.9 | 1607     | 1079             | 2024             |
| LNFP-II | G2         | PRE-TERM  | 7                | 5  | 774.2                    | 2116  | 1409  | 586.6 | 1163     | 1050             | 1942             |
| LNFP-II | G2         | PRE-TERM  | 8                | 5  | 730.6                    | 1804  | 1205  | 427.2 | 1039     | 983.3            | 1468             |
| LNFP-II | G2         | PRE-TERM  | 10               | 4  | 656.5                    | 1432  | 1004  | 365.3 | 964.1    | 725.1            | 1243             |
| LNFP-II | G2         | PRE-TERM  | 12               | 5  | 630.5                    | 2373  | 1177  | 779.3 | 668.0    | 643.6            | 1571             |
| LNFP-II | G2         | PRE-TERM  | 14               | 5  | 483.6                    | 1476  | 942.4 | 451.9 | 784.2    | 601.3            | 1367             |
| LNFP-II | G2         | PRE-TERM  | 16               | 3  | 561.9                    | 2593  | 1452  | 1039  | 1201     | 881.4            | 1897             |
| LNFP-II | G2         | TERM      | 1                | 5  | 1069                     | 1616  | 1290  | 206.7 | 1238     | 1186             | 1339             |
| LNFP-II | G2         | TERM      | 2                | 5  | 901.1                    | 1884  | 1447  | 377.0 | 1468     | 1296             | 1684             |

**Table S2 Concentration of Human Milk Oligosaccharides in Term or Preterm Milk At Different Weeks Postpartum Separated By Milk Group**

*\* When there are results below the method limit of quantification (LoQ) the result has been assigned value of  $0.5 \times \text{LoQ}$ , hence the minimum value appears to be the same in many cases. When a large number of datapoints are below LoQ this can also have the effect that the median = minimum.*

| HMO     | Milk Group | Study Arm | Week Post Partum | N | HMO Concentration (mg/L) |       |       |       |          |                  |                  |
|---------|------------|-----------|------------------|---|--------------------------|-------|-------|-------|----------|------------------|------------------|
|         |            |           |                  |   | min *                    | max   | mean  | sd    | median * | Quartile 1 (25%) | Quartile 3 (75%) |
| LNFP-II | G2         | TERM      | 3                | 5 | 884.6                    | 1672  | 1399  | 334.8 | 1577     | 1238             | 1626             |
| LNFP-II | G2         | TERM      | 4                | 5 | 947.7                    | 1565  | 1285  | 221.0 | 1310     | 1268             | 1332             |
| LNFP-II | G2         | TERM      | 5                | 5 | 964.1                    | 1411  | 1180  | 165.8 | 1134     | 1133             | 1257             |
| LNFP-II | G2         | TERM      | 6                | 5 | 376.0                    | 1476  | 981.4 | 414.9 | 982.8    | 847.4            | 1225             |
| LNFP-II | G2         | TERM      | 7                | 5 | 530.4                    | 1171  | 881.4 | 266.6 | 923.5    | 697.1            | 1085             |
| LNFP-II | G2         | TERM      | 8                | 5 | 597.7                    | 1272  | 940.4 | 305.3 | 1038     | 640.1            | 1155             |
| LNFP-II | G3         | PRE-TERM  | 1                | 1 | 17.50                    | 17.50 | 17.50 | NA    | 17.50    | 17.50            | 17.50            |
| LNFP-II | G3         | PRE-TERM  | 2                | 1 | 17.50                    | 17.50 | 17.50 | NA    | 17.50    | 17.50            | 17.50            |
| LNFP-II | G3         | PRE-TERM  | 3                | 1 | 17.50                    | 17.50 | 17.50 | NA    | 17.50    | 17.50            | 17.50            |
| LNFP-II | G3         | PRE-TERM  | 4                | 1 | 17.50                    | 17.50 | 17.50 | NA    | 17.50    | 17.50            | 17.50            |
| LNFP-II | G3         | PRE-TERM  | 5                | 1 | 17.50                    | 17.50 | 17.50 | NA    | 17.50    | 17.50            | 17.50            |
| LNFP-II | G3         | PRE-TERM  | 6                | 1 | 17.50                    | 17.50 | 17.50 | NA    | 17.50    | 17.50            | 17.50            |
| LNFP-II | G3         | PRE-TERM  | 7                | 1 | 17.50                    | 17.50 | 17.50 | NA    | 17.50    | 17.50            | 17.50            |
| LNFP-II | G3         | PRE-TERM  | 8                | 1 | 17.50                    | 17.50 | 17.50 | NA    | 17.50    | 17.50            | 17.50            |
| LNFP-II | G3         | PRE-TERM  | 10               | 1 | 17.50                    | 17.50 | 17.50 | NA    | 17.50    | 17.50            | 17.50            |
| LNFP-II | G3         | PRE-TERM  | 12               | 1 | 17.50                    | 17.50 | 17.50 | NA    | 17.50    | 17.50            | 17.50            |
| LNFP-II | G3         | PRE-TERM  | 14               | 1 | 17.50                    | 17.50 | 17.50 | NA    | 17.50    | 17.50            | 17.50            |
| LNFP-II | G3         | PRE-TERM  | 16               | 1 | 17.50                    | 17.50 | 17.50 | NA    | 17.50    | 17.50            | 17.50            |
| LNFP-II | G3         | TERM      | 1                | 1 | 17.50                    | 17.50 | 17.50 | NA    | 17.50    | 17.50            | 17.50            |
| LNFP-II | G3         | TERM      | 2                | 1 | 17.50                    | 17.50 | 17.50 | NA    | 17.50    | 17.50            | 17.50            |
| LNFP-II | G3         | TERM      | 3                | 1 | 17.50                    | 17.50 | 17.50 | NA    | 17.50    | 17.50            | 17.50            |
| LNFP-II | G3         | TERM      | 4                | 1 | 17.50                    | 17.50 | 17.50 | NA    | 17.50    | 17.50            | 17.50            |
| LNFP-II | G3         | TERM      | 5                | 1 | 17.50                    | 17.50 | 17.50 | NA    | 17.50    | 17.50            | 17.50            |
| LNFP-II | G3         | TERM      | 6                | 1 | 17.50                    | 17.50 | 17.50 | NA    | 17.50    | 17.50            | 17.50            |
| LNFP-II | G3         | TERM      | 7                | 1 | 17.50                    | 17.50 | 17.50 | NA    | 17.50    | 17.50            | 17.50            |
| LNFP-II | G3         | TERM      | 8                | 1 | 17.50                    | 17.50 | 17.50 | NA    | 17.50    | 17.50            | 17.50            |
| LNFP-II | G4         | TERM      | 1                | 1 | 17.50                    | 17.50 | 17.50 | NA    | 17.50    | 17.50            | 17.50            |
| LNFP-II | G4         | TERM      | 2                | 1 | 17.50                    | 17.50 | 17.50 | NA    | 17.50    | 17.50            | 17.50            |
| LNFP-II | G4         | TERM      | 3                | 1 | 17.50                    | 17.50 | 17.50 | NA    | 17.50    | 17.50            | 17.50            |
| LNFP-II | G4         | TERM      | 4                | 1 | 17.50                    | 17.50 | 17.50 | NA    | 17.50    | 17.50            | 17.50            |
| LNFP-II | G4         | TERM      | 5                | 1 | 17.50                    | 17.50 | 17.50 | NA    | 17.50    | 17.50            | 17.50            |
| LNFP-II | G4         | TERM      | 6                | 1 | 17.50                    | 17.50 | 17.50 | NA    | 17.50    | 17.50            | 17.50            |
| LNFP-II | G4         | TERM      | 7                | 1 | 17.50                    | 17.50 | 17.50 | NA    | 17.50    | 17.50            | 17.50            |
| LNFP-II | G4         | TERM      | 8                | 1 | 17.50                    | 17.50 | 17.50 | NA    | 17.50    | 17.50            | 17.50            |

**Table S2 Concentration of Human Milk Oligosaccharides in Term or Preterm Milk At Different Weeks Postpartum Separated By Milk Group**

\* When there are results below the method limit of quantification (LoQ) the result has been assigned value of  $0.5 \times \text{LoQ}$ , hence the minimum value appears to be the same in many cases. When a large number of datapoints are below LoQ this can also have the effect that the median = minimum.

| HMO      | Milk Group | Study Arm | Week Post Partum | N  | HMO Concentration (mg/L) |       |       |       |          |                  |                  |
|----------|------------|-----------|------------------|----|--------------------------|-------|-------|-------|----------|------------------|------------------|
|          |            |           |                  |    | min *                    | max   | mean  | sd    | median * | Quartile 1 (25%) | Quartile 3 (75%) |
| LNFP-III | G1         | PRE-TERM  | 1                | 19 | 55.72                    | 407.8 | 285.7 | 108.9 | 314.2    | 203.7            | 386.6            |
| LNFP-III | G1         | PRE-TERM  | 2                | 19 | 35.70                    | 464.9 | 246.6 | 107.7 | 276.7    | 170.0            | 316.8            |
| LNFP-III | G1         | PRE-TERM  | 3                | 19 | 40.94                    | 480.4 | 248.2 | 107.9 | 254.7    | 201.2            | 283.9            |
| LNFP-III | G1         | PRE-TERM  | 4                | 18 | 49.93                    | 504.7 | 266.6 | 116.7 | 277.1    | 186.4            | 331.8            |
| LNFP-III | G1         | PRE-TERM  | 5                | 19 | 52.14                    | 506.1 | 282.8 | 115.7 | 287.8    | 217.0            | 362.3            |
| LNFP-III | G1         | PRE-TERM  | 6                | 18 | 49.25                    | 491.8 | 297.5 | 132.4 | 308.2    | 206.3            | 398.6            |
| LNFP-III | G1         | PRE-TERM  | 7                | 18 | 17.50                    | 615.4 | 317.8 | 157.1 | 312.6    | 220.6            | 380.4            |
| LNFP-III | G1         | PRE-TERM  | 8                | 18 | 52.97                    | 847.4 | 346.2 | 175.6 | 308.5    | 249.0            | 404.4            |
| LNFP-III | G1         | PRE-TERM  | 10               | 18 | 60.20                    | 707.5 | 349.6 | 159.4 | 332.1    | 260.2            | 430.9            |
| LNFP-III | G1         | PRE-TERM  | 12               | 15 | 50.94                    | 653.0 | 380.2 | 172.9 | 385.3    | 261.5            | 450.0            |
| LNFP-III | G1         | PRE-TERM  | 14               | 15 | 74.13                    | 599.0 | 345.2 | 154.7 | 352.5    | 218.6            | 445.6            |
| LNFP-III | G1         | PRE-TERM  | 16               | 15 | 89.27                    | 774.0 | 346.7 | 185.3 | 309.2    | 226.2            | 448.0            |
| LNFP-III | G1         | TERM      | 1                | 21 | 178.7                    | 490.3 | 357.3 | 99.16 | 366.7    | 309.8            | 444.4            |
| LNFP-III | G1         | TERM      | 2                | 19 | 163.3                    | 459.1 | 305.0 | 84.84 | 307.3    | 237.5            | 351.5            |
| LNFP-III | G1         | TERM      | 3                | 21 | 153.7                    | 394.7 | 262.0 | 63.97 | 247.7    | 216.6            | 298.0            |
| LNFP-III | G1         | TERM      | 4                | 21 | 153.3                    | 485.4 | 262.3 | 90.11 | 235.1    | 202.4            | 313.8            |
| LNFP-III | G1         | TERM      | 5                | 21 | 165.5                    | 438.5 | 274.5 | 84.92 | 269.2    | 222.4            | 294.9            |
| LNFP-III | G1         | TERM      | 6                | 20 | 17.50                    | 575.0 | 293.0 | 117.3 | 293.5    | 213.0            | 328.7            |
| LNFP-III | G1         | TERM      | 7                | 20 | 191.4                    | 722.3 | 316.5 | 125.4 | 270.2    | 236.1            | 361.7            |
| LNFP-III | G1         | TERM      | 8                | 21 | 108.0                    | 526.2 | 298.4 | 103.0 | 280.7    | 229.6            | 347.0            |
| LNFP-III | G2         | PRE-TERM  | 1                | 5  | 416.8                    | 713.1 | 580.6 | 119.9 | 558.9    | 532.2            | 682.1            |
| LNFP-III | G2         | PRE-TERM  | 2                | 5  | 331.9                    | 779.2 | 565.0 | 165.5 | 569.3    | 504.4            | 640.0            |
| LNFP-III | G2         | PRE-TERM  | 3                | 5  | 365.1                    | 733.6 | 525.5 | 160.4 | 465.2    | 409.1            | 654.7            |
| LNFP-III | G2         | PRE-TERM  | 4                | 5  | 251.7                    | 727.3 | 436.3 | 181.4 | 426.4    | 324.2            | 451.6            |
| LNFP-III | G2         | PRE-TERM  | 5                | 5  | 230.6                    | 742.0 | 465.7 | 185.5 | 463.0    | 394.8            | 498.3            |
| LNFP-III | G2         | PRE-TERM  | 6                | 5  | 209.6                    | 543.6 | 417.4 | 134.0 | 445.5    | 371.8            | 516.6            |
| LNFP-III | G2         | PRE-TERM  | 7                | 5  | 255.7                    | 711.8 | 404.9 | 183.6 | 328.4    | 296.2            | 432.6            |
| LNFP-III | G2         | PRE-TERM  | 8                | 5  | 237.8                    | 767.7 | 400.0 | 226.1 | 273.4    | 251.4            | 469.7            |
| LNFP-III | G2         | PRE-TERM  | 10               | 4  | 243.5                    | 526.8 | 357.7 | 121.5 | 330.3    | 290.5            | 397.5            |
| LNFP-III | G2         | PRE-TERM  | 12               | 5  | 238.6                    | 616.5 | 421.9 | 166.2 | 472.4    | 259.4            | 522.3            |
| LNFP-III | G2         | PRE-TERM  | 14               | 5  | 228.7                    | 750.3 | 431.2 | 217.5 | 352.7    | 271.7            | 552.8            |
| LNFP-III | G2         | PRE-TERM  | 16               | 3  | 214.5                    | 354.6 | 304.9 | 78.36 | 345.5    | 280.0            | 350.0            |
| LNFP-III | G2         | TERM      | 1                | 5  | 76.48                    | 826.9 | 535.2 | 286.3 | 611.8    | 474.8            | 685.9            |
| LNFP-III | G2         | TERM      | 2                | 5  | 388.9                    | 590.7 | 482.8 | 71.78 | 479.1    | 471.4            | 484.1            |

**Table S2 Concentration of Human Milk Oligosaccharides in Term or Preterm Milk At Different Weeks Postpartum Separated By Milk Group**

\* When there are results below the method limit of quantification (LoQ) the result has been assigned value of  $0.5 \times \text{LoQ}$ , hence the minimum value appears to be the same in many cases. When a large number of datapoints are below LoQ this can also have the effect that the median = minimum.

| HMO      | Milk Group | Study Arm | Week<br>Post Partum | N | HMO Concentration (mg/L) |       |       |       |          |                     |                     |
|----------|------------|-----------|---------------------|---|--------------------------|-------|-------|-------|----------|---------------------|---------------------|
|          |            |           |                     |   | min *                    | max   | mean  | sd    | median * | Quartile 1<br>(25%) | Quartile 3<br>(75%) |
| LNFP-III | G2         | TERM      | 3                   | 5 | 318.0                    | 515.2 | 381.8 | 80.55 | 339.0    | 337.6               | 399.3               |
| LNFP-III | G2         | TERM      | 4                   | 5 | 273.1                    | 525.0 | 347.9 | 103.9 | 294.0    | 290.7               | 356.7               |
| LNFP-III | G2         | TERM      | 5                   | 5 | 247.7                    | 494.3 | 351.8 | 92.86 | 336.1    | 302.7               | 378.4               |
| LNFP-III | G2         | TERM      | 6                   | 5 | 147.3                    | 499.8 | 373.0 | 133.3 | 395.6    | 394.5               | 428.0               |
| LNFP-III | G2         | TERM      | 7                   | 5 | 280.5                    | 461.6 | 345.7 | 69.91 | 319.1    | 312.8               | 354.7               |
| LNFP-III | G2         | TERM      | 8                   | 5 | 272.6                    | 493.6 | 364.3 | 83.62 | 368.3    | 312.1               | 375.0               |
| LNFP-III | G3         | PRE-TERM  | 1                   | 1 | 322.8                    | 322.8 | 322.8 | NA    | 322.8    | 322.8               | 322.8               |
| LNFP-III | G3         | PRE-TERM  | 2                   | 1 | 418.0                    | 418.0 | 418.0 | NA    | 418.0    | 418.0               | 418.0               |
| LNFP-III | G3         | PRE-TERM  | 3                   | 1 | 352.3                    | 352.3 | 352.3 | NA    | 352.3    | 352.3               | 352.3               |
| LNFP-III | G3         | PRE-TERM  | 4                   | 1 | 290.1                    | 290.1 | 290.1 | NA    | 290.1    | 290.1               | 290.1               |
| LNFP-III | G3         | PRE-TERM  | 5                   | 1 | 324.2                    | 324.2 | 324.2 | NA    | 324.2    | 324.2               | 324.2               |
| LNFP-III | G3         | PRE-TERM  | 6                   | 1 | 430.5                    | 430.5 | 430.5 | NA    | 430.5    | 430.5               | 430.5               |
| LNFP-III | G3         | PRE-TERM  | 7                   | 1 | 334.1                    | 334.1 | 334.1 | NA    | 334.1    | 334.1               | 334.1               |
| LNFP-III | G3         | PRE-TERM  | 8                   | 1 | 340.3                    | 340.3 | 340.3 | NA    | 340.3    | 340.3               | 340.3               |
| LNFP-III | G3         | PRE-TERM  | 10                  | 1 | 329.7                    | 329.7 | 329.7 | NA    | 329.7    | 329.7               | 329.7               |
| LNFP-III | G3         | PRE-TERM  | 12                  | 1 | 357.3                    | 357.3 | 357.3 | NA    | 357.3    | 357.3               | 357.3               |
| LNFP-III | G3         | PRE-TERM  | 14                  | 1 | 404.7                    | 404.7 | 404.7 | NA    | 404.7    | 404.7               | 404.7               |
| LNFP-III | G3         | PRE-TERM  | 16                  | 1 | 407.3                    | 407.3 | 407.3 | NA    | 407.3    | 407.3               | 407.3               |
| LNFP-III | G3         | TERM      | 1                   | 1 | 329.2                    | 329.2 | 329.2 | NA    | 329.2    | 329.2               | 329.2               |
| LNFP-III | G3         | TERM      | 2                   | 1 | 262.9                    | 262.9 | 262.9 | NA    | 262.9    | 262.9               | 262.9               |
| LNFP-III | G3         | TERM      | 3                   | 1 | 219.7                    | 219.7 | 219.7 | NA    | 219.7    | 219.7               | 219.7               |
| LNFP-III | G3         | TERM      | 4                   | 1 | 238.9                    | 238.9 | 238.9 | NA    | 238.9    | 238.9               | 238.9               |
| LNFP-III | G3         | TERM      | 5                   | 1 | 202.2                    | 202.2 | 202.2 | NA    | 202.2    | 202.2               | 202.2               |
| LNFP-III | G3         | TERM      | 6                   | 1 | 196.3                    | 196.3 | 196.3 | NA    | 196.3    | 196.3               | 196.3               |
| LNFP-III | G3         | TERM      | 7                   | 1 | 190.9                    | 190.9 | 190.9 | NA    | 190.9    | 190.9               | 190.9               |
| LNFP-III | G3         | TERM      | 8                   | 1 | 262.5                    | 262.5 | 262.5 | NA    | 262.5    | 262.5               | 262.5               |
| LNFP-III | G4         | TERM      | 1                   | 1 | 1268                     | 1268  | 1268  | NA    | 1268     | 1268                | 1268                |
| LNFP-III | G4         | TERM      | 2                   | 1 | 1169                     | 1169  | 1169  | NA    | 1169     | 1169                | 1169                |
| LNFP-III | G4         | TERM      | 3                   | 1 | 911.0                    | 911.0 | 911.0 | NA    | 911.0    | 911.0               | 911.0               |
| LNFP-III | G4         | TERM      | 4                   | 1 | 823.9                    | 823.9 | 823.9 | NA    | 823.9    | 823.9               | 823.9               |
| LNFP-III | G4         | TERM      | 5                   | 1 | 714.0                    | 714.0 | 714.0 | NA    | 714.0    | 714.0               | 714.0               |
| LNFP-III | G4         | TERM      | 6                   | 1 | 786.1                    | 786.1 | 786.1 | NA    | 786.1    | 786.1               | 786.1               |
| LNFP-III | G4         | TERM      | 7                   | 1 | 703.6                    | 703.6 | 703.6 | NA    | 703.6    | 703.6               | 703.6               |
| LNFP-III | G4         | TERM      | 8                   | 1 | 569.7                    | 569.7 | 569.7 | NA    | 569.7    | 569.7               | 569.7               |

**Table S2 Concentration of Human Milk Oligosaccharides in Term or Preterm Milk At Different Weeks Postpartum Separated By Milk Group**

\* When there are results below the method limit of quantification (LoQ) the result has been assigned value of  $0.5 \times \text{LoQ}$ , hence the minimum value appears to be the same in many cases. When a large number of datapoints are below LoQ this can also have the effect that the median = minimum.

| HMO    | Milk Group | Study Arm | Week<br>Post Partum | N  | HMO Concentration (mg/L) |       |       |       |          |                     |                     |
|--------|------------|-----------|---------------------|----|--------------------------|-------|-------|-------|----------|---------------------|---------------------|
|        |            |           |                     |    | min *                    | max   | mean  | sd    | median * | Quartile 1<br>(25%) | Quartile 3<br>(75%) |
| LNFP-V | G1         | PRE-TERM  | 1                   | 19 | 12.00                    | 140.4 | 32.14 | 31.53 | 12.00    | 12.00               | 42.53               |
| LNFP-V | G1         | PRE-TERM  | 2                   | 19 | 12.00                    | 140.5 | 42.15 | 35.84 | 29.30    | 12.00               | 53.09               |
| LNFP-V | G1         | PRE-TERM  | 3                   | 19 | 12.00                    | 123.0 | 48.87 | 32.34 | 40.14    | 25.52               | 63.99               |
| LNFP-V | G1         | PRE-TERM  | 4                   | 18 | 12.00                    | 112.6 | 47.00 | 32.65 | 37.61    | 16.38               | 64.85               |
| LNFP-V | G1         | PRE-TERM  | 5                   | 19 | 12.00                    | 108.5 | 50.49 | 31.95 | 43.41    | 18.59               | 72.87               |
| LNFP-V | G1         | PRE-TERM  | 6                   | 18 | 12.00                    | 123.1 | 50.17 | 34.79 | 47.72    | 16.07               | 73.04               |
| LNFP-V | G1         | PRE-TERM  | 7                   | 18 | 12.00                    | 121.4 | 52.68 | 36.62 | 46.71    | 15.27               | 83.60               |
| LNFP-V | G1         | PRE-TERM  | 8                   | 18 | 12.00                    | 116.0 | 51.24 | 33.27 | 42.41    | 25.94               | 71.18               |
| LNFP-V | G1         | PRE-TERM  | 10                  | 18 | 12.00                    | 98.71 | 43.85 | 31.74 | 32.45    | 12.00               | 77.27               |
| LNFP-V | G1         | PRE-TERM  | 12                  | 15 | 12.00                    | 83.16 | 43.61 | 26.57 | 50.05    | 12.00               | 65.23               |
| LNFP-V | G1         | PRE-TERM  | 14                  | 15 | 12.00                    | 85.62 | 44.40 | 24.05 | 42.09    | 27.28               | 62.68               |
| LNFP-V | G1         | PRE-TERM  | 16                  | 15 | 12.00                    | 122.5 | 39.88 | 28.86 | 36.51    | 19.79               | 49.86               |
| LNFP-V | G1         | TERM      | 1                   | 21 | 12.00                    | 72.60 | 27.76 | 20.15 | 12.00    | 12.00               | 41.54               |
| LNFP-V | G1         | TERM      | 2                   | 19 | 12.00                    | 73.68 | 38.91 | 19.24 | 39.71    | 24.86               | 53.26               |
| LNFP-V | G1         | TERM      | 3                   | 21 | 12.00                    | 349.1 | 56.05 | 70.23 | 43.48    | 28.92               | 59.92               |
| LNFP-V | G1         | TERM      | 4                   | 21 | 12.00                    | 83.09 | 39.89 | 19.90 | 38.63    | 25.59               | 54.57               |
| LNFP-V | G1         | TERM      | 5                   | 21 | 12.00                    | 84.50 | 41.00 | 21.80 | 35.67    | 25.64               | 55.00               |
| LNFP-V | G1         | TERM      | 6                   | 20 | 12.00                    | 94.30 | 44.36 | 25.10 | 41.17    | 27.62               | 58.07               |
| LNFP-V | G1         | TERM      | 7                   | 20 | 12.00                    | 105.3 | 42.55 | 26.20 | 35.82    | 23.88               | 61.93               |
| LNFP-V | G1         | TERM      | 8                   | 21 | 12.00                    | 101.5 | 34.60 | 25.52 | 32.68    | 12.00               | 54.87               |
| LNFP-V | G2         | PRE-TERM  | 1                   | 5  | 191.2                    | 320.9 | 254.7 | 54.02 | 233.8    | 227.2               | 300.2               |
| LNFP-V | G2         | PRE-TERM  | 2                   | 5  | 163.8                    | 317.8 | 262.9 | 60.19 | 289.0    | 252.0               | 292.2               |
| LNFP-V | G2         | PRE-TERM  | 3                   | 5  | 154.2                    | 309.0 | 261.9 | 62.06 | 286.3    | 266.9               | 292.9               |
| LNFP-V | G2         | PRE-TERM  | 4                   | 5  | 179.9                    | 363.8 | 260.5 | 74.28 | 261.9    | 200.4               | 296.5               |
| LNFP-V | G2         | PRE-TERM  | 5                   | 5  | 172.5                    | 301.0 | 227.1 | 55.71 | 211.9    | 181.9               | 268.3               |
| LNFP-V | G2         | PRE-TERM  | 6                   | 5  | 149.2                    | 359.5 | 260.7 | 84.80 | 285.4    | 200.5               | 309.0               |
| LNFP-V | G2         | PRE-TERM  | 7                   | 5  | 142.7                    | 321.2 | 233.9 | 74.55 | 212.6    | 193.9               | 299.1               |
| LNFP-V | G2         | PRE-TERM  | 8                   | 5  | 134.9                    | 260.0 | 194.2 | 47.18 | 203.6    | 165.7               | 207.0               |
| LNFP-V | G2         | PRE-TERM  | 10                  | 4  | 123.3                    | 182.5 | 151.4 | 27.19 | 150.0    | 132.0               | 169.4               |
| LNFP-V | G2         | PRE-TERM  | 12                  | 5  | 80.43                    | 328.8 | 167.9 | 99.08 | 118.5    | 117.2               | 194.4               |
| LNFP-V | G2         | PRE-TERM  | 14                  | 5  | 87.30                    | 202.6 | 144.1 | 53.78 | 118.6    | 111.5               | 200.7               |
| LNFP-V | G2         | PRE-TERM  | 16                  | 3  | 102.8                    | 408.7 | 226.9 | 160.9 | 169.4    | 136.1               | 289.0               |
| LNFP-V | G2         | TERM      | 1                   | 5  | 128.7                    | 191.8 | 165.3 | 29.38 | 181.0    | 138.6               | 186.6               |
| LNFP-V | G2         | TERM      | 2                   | 5  | 143.0                    | 226.3 | 187.0 | 37.67 | 190.8    | 154.5               | 220.4               |

**Table S2 Concentration of Human Milk Oligosaccharides in Term or Preterm Milk At Different Weeks Postpartum Separated By Milk Group**

*\* When there are results below the method limit of quantification (LoQ) the result has been assigned value of  $0.5 \times \text{LoQ}$ , hence the minimum value appears to be the same in many cases. When a large number of datapoints are below LoQ this can also have the effect that the median = minimum.*

| HMO    | Milk Group | Study Arm | Week Post Partum | N | HMO Concentration (mg/L) |       |       |       |          |                  |                  |
|--------|------------|-----------|------------------|---|--------------------------|-------|-------|-------|----------|------------------|------------------|
|        |            |           |                  |   | min *                    | max   | mean  | sd    | median * | Quartile 1 (25%) | Quartile 3 (75%) |
| LNFP-V | G2         | TERM      | 3                | 5 | 139.7                    | 247.0 | 190.8 | 45.88 | 209.6    | 147.2            | 210.6            |
| LNFP-V | G2         | TERM      | 4                | 5 | 163.2                    | 202.6 | 180.3 | 18.50 | 173.2    | 165.2            | 197.5            |
| LNFP-V | G2         | TERM      | 5                | 5 | 139.2                    | 228.2 | 168.3 | 37.26 | 154.3    | 140.1            | 179.4            |
| LNFP-V | G2         | TERM      | 6                | 5 | 46.89                    | 226.4 | 136.8 | 64.33 | 142.8    | 119.8            | 148.0            |
| LNFP-V | G2         | TERM      | 7                | 5 | 87.21                    | 162.9 | 118.7 | 33.13 | 111.1    | 89.82            | 142.2            |
| LNFP-V | G2         | TERM      | 8                | 5 | 76.47                    | 196.7 | 127.1 | 44.19 | 124.8    | 107.4            | 130.3            |
| LNFP-V | G3         | PRE-TERM  | 1                | 1 | 12.00                    | 12.00 | 12.00 | NA    | 12.00    | 12.00            | 12.00            |
| LNFP-V | G3         | PRE-TERM  | 2                | 1 | 12.00                    | 12.00 | 12.00 | NA    | 12.00    | 12.00            | 12.00            |
| LNFP-V | G3         | PRE-TERM  | 3                | 1 | 24.37                    | 24.37 | 24.37 | NA    | 24.37    | 24.37            | 24.37            |
| LNFP-V | G3         | PRE-TERM  | 4                | 1 | 12.00                    | 12.00 | 12.00 | NA    | 12.00    | 12.00            | 12.00            |
| LNFP-V | G3         | PRE-TERM  | 5                | 1 | 12.00                    | 12.00 | 12.00 | NA    | 12.00    | 12.00            | 12.00            |
| LNFP-V | G3         | PRE-TERM  | 6                | 1 | 12.00                    | 12.00 | 12.00 | NA    | 12.00    | 12.00            | 12.00            |
| LNFP-V | G3         | PRE-TERM  | 7                | 1 | 12.00                    | 12.00 | 12.00 | NA    | 12.00    | 12.00            | 12.00            |
| LNFP-V | G3         | PRE-TERM  | 8                | 1 | 12.00                    | 12.00 | 12.00 | NA    | 12.00    | 12.00            | 12.00            |
| LNFP-V | G3         | PRE-TERM  | 10               | 1 | 12.00                    | 12.00 | 12.00 | NA    | 12.00    | 12.00            | 12.00            |
| LNFP-V | G3         | PRE-TERM  | 12               | 1 | 26.89                    | 26.89 | 26.89 | NA    | 26.89    | 26.89            | 26.89            |
| LNFP-V | G3         | PRE-TERM  | 14               | 1 | 25.61                    | 25.61 | 25.61 | NA    | 25.61    | 25.61            | 25.61            |
| LNFP-V | G3         | PRE-TERM  | 16               | 1 | 28.52                    | 28.52 | 28.52 | NA    | 28.52    | 28.52            | 28.52            |
| LNFP-V | G3         | TERM      | 1                | 1 | 25.88                    | 25.88 | 25.88 | NA    | 25.88    | 25.88            | 25.88            |
| LNFP-V | G3         | TERM      | 2                | 1 | 12.00                    | 12.00 | 12.00 | NA    | 12.00    | 12.00            | 12.00            |
| LNFP-V | G3         | TERM      | 3                | 1 | 12.00                    | 12.00 | 12.00 | NA    | 12.00    | 12.00            | 12.00            |
| LNFP-V | G3         | TERM      | 4                | 1 | 12.00                    | 12.00 | 12.00 | NA    | 12.00    | 12.00            | 12.00            |
| LNFP-V | G3         | TERM      | 5                | 1 | 12.00                    | 12.00 | 12.00 | NA    | 12.00    | 12.00            | 12.00            |
| LNFP-V | G3         | TERM      | 6                | 1 | 12.00                    | 12.00 | 12.00 | NA    | 12.00    | 12.00            | 12.00            |
| LNFP-V | G3         | TERM      | 7                | 1 | 12.00                    | 12.00 | 12.00 | NA    | 12.00    | 12.00            | 12.00            |
| LNFP-V | G3         | TERM      | 8                | 1 | 12.00                    | 12.00 | 12.00 | NA    | 12.00    | 12.00            | 12.00            |
| LNFP-V | G4         | TERM      | 1                | 1 | 203.7                    | 203.7 | 203.7 | NA    | 203.7    | 203.7            | 203.7            |
| LNFP-V | G4         | TERM      | 2                | 1 | 268.1                    | 268.1 | 268.1 | NA    | 268.1    | 268.1            | 268.1            |
| LNFP-V | G4         | TERM      | 3                | 1 | 127.3                    | 127.3 | 127.3 | NA    | 127.3    | 127.3            | 127.3            |
| LNFP-V | G4         | TERM      | 4                | 1 | 140.0                    | 140.0 | 140.0 | NA    | 140.0    | 140.0            | 140.0            |
| LNFP-V | G4         | TERM      | 5                | 1 | 103.6                    | 103.6 | 103.6 | NA    | 103.6    | 103.6            | 103.6            |
| LNFP-V | G4         | TERM      | 6                | 1 | 139.8                    | 139.8 | 139.8 | NA    | 139.8    | 139.8            | 139.8            |
| LNFP-V | G4         | TERM      | 7                | 1 | 102.4                    | 102.4 | 102.4 | NA    | 102.4    | 102.4            | 102.4            |
| LNFP-V | G4         | TERM      | 8                | 1 | 119.7                    | 119.7 | 119.7 | NA    | 119.7    | 119.7            | 119.7            |

**Table S2 Concentration of Human Milk Oligosaccharides in Term or Preterm Milk At Different Weeks Postpartum Separated By Milk Group**

*\* When there are results below the method limit of quantification (LoQ) the result has been assigned value of  $0.5 \times \text{LoQ}$ , hence the minimum value appears to be the same in many cases. When a large number of datapoints are below LoQ this can also have the effect that the median = minimum.*

| HMO    | Milk Group | Study Arm | Week Post Partum | N  | HMO Concentration (mg/L) |       |       |       |          |                  |                  |
|--------|------------|-----------|------------------|----|--------------------------|-------|-------|-------|----------|------------------|------------------|
|        |            |           |                  |    | min *                    | max   | mean  | sd    | median * | Quartile 1 (25%) | Quartile 3 (75%) |
| LNnDFH | G1         | PRE-TERM  | 1                | 19 | 14.00                    | 110.4 | 38.22 | 29.59 | 29.06    | 14.00            | 58.24            |
| LNnDFH | G1         | PRE-TERM  | 2                | 19 | 14.00                    | 74.76 | 24.70 | 16.92 | 14.00    | 14.00            | 35.11            |
| LNnDFH | G1         | PRE-TERM  | 3                | 19 | 14.00                    | 58.17 | 19.63 | 13.69 | 14.00    | 14.00            | 14.00            |
| LNnDFH | G1         | PRE-TERM  | 4                | 18 | 14.00                    | 120.6 | 21.87 | 25.99 | 14.00    | 14.00            | 14.00            |
| LNnDFH | G1         | PRE-TERM  | 5                | 19 | 14.00                    | 183.2 | 31.03 | 39.92 | 14.00    | 14.00            | 34.18            |
| LNnDFH | G1         | PRE-TERM  | 6                | 18 | 14.00                    | 84.51 | 24.23 | 18.58 | 14.00    | 14.00            | 32.33            |
| LNnDFH | G1         | PRE-TERM  | 7                | 18 | 14.00                    | 61.83 | 19.30 | 13.12 | 14.00    | 14.00            | 14.00            |
| LNnDFH | G1         | PRE-TERM  | 8                | 18 | 14.00                    | 107.7 | 27.44 | 28.24 | 14.00    | 14.00            | 28.62            |
| LNnDFH | G1         | PRE-TERM  | 10               | 18 | 14.00                    | 72.87 | 28.89 | 18.19 | 29.46    | 14.00            | 34.48            |
| LNnDFH | G1         | PRE-TERM  | 12               | 15 | 14.00                    | 85.19 | 38.91 | 27.21 | 38.76    | 14.00            | 61.35            |
| LNnDFH | G1         | PRE-TERM  | 14               | 15 | 14.00                    | 67.12 | 29.37 | 19.22 | 14.00    | 14.00            | 38.90            |
| LNnDFH | G1         | PRE-TERM  | 16               | 15 | 14.00                    | 105.1 | 35.45 | 25.89 | 30.74    | 14.00            | 49.01            |
| LNnDFH | G1         | TERM      | 1                | 21 | 14.00                    | 181.8 | 60.38 | 50.76 | 46.26    | 14.00            | 91.68            |
| LNnDFH | G1         | TERM      | 2                | 19 | 14.00                    | 107.6 | 34.32 | 27.76 | 14.00    | 14.00            | 45.98            |
| LNnDFH | G1         | TERM      | 3                | 21 | 14.00                    | 77.46 | 25.12 | 17.44 | 14.00    | 14.00            | 32.72            |
| LNnDFH | G1         | TERM      | 4                | 21 | 14.00                    | 42.02 | 19.49 | 10.27 | 14.00    | 14.00            | 14.00            |
| LNnDFH | G1         | TERM      | 5                | 21 | 14.00                    | 132.3 | 25.48 | 26.93 | 14.00    | 14.00            | 28.78            |
| LNnDFH | G1         | TERM      | 6                | 20 | 14.00                    | 98.17 | 33.84 | 26.39 | 14.00    | 14.00            | 47.97            |
| LNnDFH | G1         | TERM      | 7                | 20 | 14.00                    | 94.89 | 28.10 | 22.22 | 14.00    | 14.00            | 33.94            |
| LNnDFH | G1         | TERM      | 8                | 21 | 14.00                    | 85.75 | 25.25 | 22.01 | 14.00    | 14.00            | 30.07            |
| LNnDFH | G2         | PRE-TERM  | 1                | 5  | 14.00                    | 543.1 | 232.1 | 243.1 | 159.1    | 14.00            | 430.0            |
| LNnDFH | G2         | PRE-TERM  | 2                | 5  | 14.00                    | 299.7 | 117.3 | 126.5 | 62.05    | 14.00            | 196.9            |
| LNnDFH | G2         | PRE-TERM  | 3                | 5  | 14.00                    | 333.0 | 135.3 | 126.8 | 74.52    | 69.53            | 185.4            |
| LNnDFH | G2         | PRE-TERM  | 4                | 5  | 14.00                    | 195.3 | 80.38 | 69.12 | 72.38    | 42.68            | 77.51            |
| LNnDFH | G2         | PRE-TERM  | 5                | 5  | 87.06                    | 186.3 | 130.2 | 40.53 | 138.4    | 94.49            | 145.0            |
| LNnDFH | G2         | PRE-TERM  | 6                | 5  | 14.00                    | 167.1 | 90.21 | 55.71 | 89.18    | 71.78            | 109.0            |
| LNnDFH | G2         | PRE-TERM  | 7                | 5  | 14.00                    | 184.6 | 65.41 | 70.24 | 49.49    | 14.00            | 65.02            |
| LNnDFH | G2         | PRE-TERM  | 8                | 5  | 14.00                    | 156.3 | 66.08 | 59.76 | 55.32    | 14.00            | 90.81            |
| LNnDFH | G2         | PRE-TERM  | 10               | 4  | 14.00                    | 119.8 | 58.38 | 53.10 | 49.85    | 14.00            | 94.23            |
| LNnDFH | G2         | PRE-TERM  | 12               | 5  | 14.00                    | 115.8 | 46.84 | 47.08 | 14.00    | 14.00            | 76.39            |
| LNnDFH | G2         | PRE-TERM  | 14               | 5  | 14.00                    | 733.1 | 193.1 | 305.5 | 78.60    | 14.00            | 125.7            |
| LNnDFH | G2         | PRE-TERM  | 16               | 3  | 14.00                    | 109.1 | 72.66 | 51.30 | 94.85    | 54.42            | 102.0            |
| LNnDFH | G2         | TERM      | 1                | 5  | 14.00                    | 48.50 | 20.90 | 15.43 | 14.00    | 14.00            | 14.00            |
| LNnDFH | G2         | TERM      | 2                | 5  | 14.00                    | 46.71 | 20.54 | 14.63 | 14.00    | 14.00            | 14.00            |

**Table S2 Concentration of Human Milk Oligosaccharides in Term or Preterm Milk At Different Weeks Postpartum Separated By Milk Group**

*\* When there are results below the method limit of quantification (LoQ) the result has been assigned value of  $0.5 \times \text{LoQ}$ , hence the minimum value appears to be the same in many cases. When a large number of datapoints are below LoQ this can also have the effect that the median = minimum.*

| HMO    | Milk Group | Study Arm | Week Post Partum | N | HMO Concentration (mg/L) |       |       |       |          |                  |                  |
|--------|------------|-----------|------------------|---|--------------------------|-------|-------|-------|----------|------------------|------------------|
|        |            |           |                  |   | min *                    | max   | mean  | sd    | median * | Quartile 1 (25%) | Quartile 3 (75%) |
| LNnDFH | G2         | TERM      | 3                | 5 | 14.00                    | 40.38 | 19.28 | 11.80 | 14.00    | 14.00            | 14.00            |
| LNnDFH | G2         | TERM      | 4                | 5 | 14.00                    | 34.25 | 18.05 | 9.055 | 14.00    | 14.00            | 14.00            |
| LNnDFH | G2         | TERM      | 5                | 5 | 14.00                    | 31.98 | 17.60 | 8.039 | 14.00    | 14.00            | 14.00            |
| LNnDFH | G2         | TERM      | 6                | 5 | 14.00                    | 97.13 | 30.63 | 37.18 | 14.00    | 14.00            | 14.00            |
| LNnDFH | G2         | TERM      | 7                | 5 | 14.00                    | 77.39 | 26.68 | 28.35 | 14.00    | 14.00            | 14.00            |
| LNnDFH | G2         | TERM      | 8                | 5 | 14.00                    | 94.07 | 30.01 | 35.81 | 14.00    | 14.00            | 14.00            |
| LNnDFH | G3         | PRE-TERM  | 1                | 1 | 14.00                    | 14.00 | 14.00 | NA    | 14.00    | 14.00            | 14.00            |
| LNnDFH | G3         | PRE-TERM  | 2                | 1 | 28.06                    | 28.06 | 28.06 | NA    | 28.06    | 28.06            | 28.06            |
| LNnDFH | G3         | PRE-TERM  | 3                | 1 | 14.00                    | 14.00 | 14.00 | NA    | 14.00    | 14.00            | 14.00            |
| LNnDFH | G3         | PRE-TERM  | 4                | 1 | 14.00                    | 14.00 | 14.00 | NA    | 14.00    | 14.00            | 14.00            |
| LNnDFH | G3         | PRE-TERM  | 5                | 1 | 14.00                    | 14.00 | 14.00 | NA    | 14.00    | 14.00            | 14.00            |
| LNnDFH | G3         | PRE-TERM  | 6                | 1 | 14.00                    | 14.00 | 14.00 | NA    | 14.00    | 14.00            | 14.00            |
| LNnDFH | G3         | PRE-TERM  | 7                | 1 | 14.00                    | 14.00 | 14.00 | NA    | 14.00    | 14.00            | 14.00            |
| LNnDFH | G3         | PRE-TERM  | 8                | 1 | 14.00                    | 14.00 | 14.00 | NA    | 14.00    | 14.00            | 14.00            |
| LNnDFH | G3         | PRE-TERM  | 10               | 1 | 14.00                    | 14.00 | 14.00 | NA    | 14.00    | 14.00            | 14.00            |
| LNnDFH | G3         | PRE-TERM  | 12               | 1 | 14.00                    | 14.00 | 14.00 | NA    | 14.00    | 14.00            | 14.00            |
| LNnDFH | G3         | PRE-TERM  | 14               | 1 | 14.00                    | 14.00 | 14.00 | NA    | 14.00    | 14.00            | 14.00            |
| LNnDFH | G3         | PRE-TERM  | 16               | 1 | 14.00                    | 14.00 | 14.00 | NA    | 14.00    | 14.00            | 14.00            |
| LNnDFH | G3         | TERM      | 1                | 1 | 14.00                    | 14.00 | 14.00 | NA    | 14.00    | 14.00            | 14.00            |
| LNnDFH | G3         | TERM      | 2                | 1 | 14.00                    | 14.00 | 14.00 | NA    | 14.00    | 14.00            | 14.00            |
| LNnDFH | G3         | TERM      | 3                | 1 | 28.07                    | 28.07 | 28.07 | NA    | 28.07    | 28.07            | 28.07            |
| LNnDFH | G3         | TERM      | 4                | 1 | 29.18                    | 29.18 | 29.18 | NA    | 29.18    | 29.18            | 29.18            |
| LNnDFH | G3         | TERM      | 5                | 1 | 14.00                    | 14.00 | 14.00 | NA    | 14.00    | 14.00            | 14.00            |
| LNnDFH | G3         | TERM      | 6                | 1 | 14.00                    | 14.00 | 14.00 | NA    | 14.00    | 14.00            | 14.00            |
| LNnDFH | G3         | TERM      | 7                | 1 | 14.00                    | 14.00 | 14.00 | NA    | 14.00    | 14.00            | 14.00            |
| LNnDFH | G3         | TERM      | 8                | 1 | 33.19                    | 33.19 | 33.19 | NA    | 33.19    | 33.19            | 33.19            |
| LNnDFH | G4         | TERM      | 1                | 1 | 60.72                    | 60.72 | 60.72 | NA    | 60.72    | 60.72            | 60.72            |
| LNnDFH | G4         | TERM      | 2                | 1 | 55.10                    | 55.10 | 55.10 | NA    | 55.10    | 55.10            | 55.10            |
| LNnDFH | G4         | TERM      | 3                | 1 | 14.00                    | 14.00 | 14.00 | NA    | 14.00    | 14.00            | 14.00            |
| LNnDFH | G4         | TERM      | 4                | 1 | 14.00                    | 14.00 | 14.00 | NA    | 14.00    | 14.00            | 14.00            |
| LNnDFH | G4         | TERM      | 5                | 1 | 14.00                    | 14.00 | 14.00 | NA    | 14.00    | 14.00            | 14.00            |
| LNnDFH | G4         | TERM      | 6                | 1 | 14.00                    | 14.00 | 14.00 | NA    | 14.00    | 14.00            | 14.00            |
| LNnDFH | G4         | TERM      | 7                | 1 | 14.00                    | 14.00 | 14.00 | NA    | 14.00    | 14.00            | 14.00            |
| LNnDFH | G4         | TERM      | 8                | 1 | 14.00                    | 14.00 | 14.00 | NA    | 14.00    | 14.00            | 14.00            |



**Table S2 Concentration of Human Milk Oligosaccharides in Term or Preterm Milk At Different Weeks Postpartum Separated By Milk Group**

\* When there are results below the method limit of quantification (LoQ) the result has been assigned value of  $0.5 \times \text{LoQ}$ , hence the minimum value appears to be the same in many cases. When a large number of datapoints are below LoQ this can also have the effect that the median = minimum.

| HMO   | Milk Group | Study Arm | Week Post Partum | N  | HMO Concentration (mg/L) |       |       |        |          |                  |                  |
|-------|------------|-----------|------------------|----|--------------------------|-------|-------|--------|----------|------------------|------------------|
|       |            |           |                  |    | min *                    | max   | mean  | sd     | median * | Quartile 1 (25%) | Quartile 3 (75%) |
| LNnFP | G1         | PRE-TERM  | 1                | 19 | 9.500                    | 89.76 | 17.38 | 19.33  | 9.500    | 9.500            | 14.70            |
| LNnFP | G1         | PRE-TERM  | 2                | 19 | 9.500                    | 50.62 | 14.38 | 10.30  | 9.500    | 9.500            | 15.30            |
| LNnFP | G1         | PRE-TERM  | 3                | 19 | 9.500                    | 50.34 | 13.13 | 10.07  | 9.500    | 9.500            | 9.500            |
| LNnFP | G1         | PRE-TERM  | 4                | 18 | 9.500                    | 59.82 | 13.47 | 12.06  | 9.500    | 9.500            | 9.500            |
| LNnFP | G1         | PRE-TERM  | 5                | 19 | 9.500                    | 61.67 | 14.38 | 12.58  | 9.500    | 9.500            | 9.500            |
| LNnFP | G1         | PRE-TERM  | 6                | 18 | 9.500                    | 60.47 | 16.39 | 13.14  | 9.500    | 9.500            | 20.06            |
| LNnFP | G1         | PRE-TERM  | 7                | 18 | 9.500                    | 55.24 | 14.91 | 12.16  | 9.500    | 9.500            | 9.500            |
| LNnFP | G1         | PRE-TERM  | 8                | 18 | 9.500                    | 57.65 | 16.41 | 15.17  | 9.500    | 9.500            | 16.65            |
| LNnFP | G1         | PRE-TERM  | 10               | 18 | 9.500                    | 60.19 | 17.53 | 14.96  | 9.500    | 9.500            | 18.69            |
| LNnFP | G1         | PRE-TERM  | 12               | 15 | 9.500                    | 53.23 | 17.15 | 13.91  | 9.500    | 9.500            | 20.97            |
| LNnFP | G1         | PRE-TERM  | 14               | 15 | 9.500                    | 70.04 | 16.99 | 18.20  | 9.500    | 9.500            | 9.500            |
| LNnFP | G1         | PRE-TERM  | 16               | 15 | 9.500                    | 88.05 | 18.80 | 22.76  | 9.500    | 9.500            | 9.500            |
| LNnFP | G1         | TERM      | 1                | 21 | 9.500                    | 38.23 | 12.07 | 7.120  | 9.500    | 9.500            | 9.500            |
| LNnFP | G1         | TERM      | 2                | 19 | 9.500                    | 38.38 | 12.85 | 8.443  | 9.500    | 9.500            | 9.500            |
| LNnFP | G1         | TERM      | 3                | 21 | 9.500                    | 27.38 | 10.90 | 4.542  | 9.500    | 9.500            | 9.500            |
| LNnFP | G1         | TERM      | 4                | 21 | 9.500                    | 66.17 | 14.15 | 12.89  | 9.500    | 9.500            | 9.500            |
| LNnFP | G1         | TERM      | 5                | 21 | 9.500                    | 29.19 | 12.21 | 6.051  | 9.500    | 9.500            | 9.500            |
| LNnFP | G1         | TERM      | 6                | 20 | 9.500                    | 24.69 | 12.44 | 5.313  | 9.500    | 9.500            | 11.92            |
| LNnFP | G1         | TERM      | 7                | 20 | 9.500                    | 22.33 | 12.68 | 5.024  | 9.500    | 9.500            | 19.18            |
| LNnFP | G1         | TERM      | 8                | 21 | 9.500                    | 22.09 | 12.24 | 5.034  | 9.500    | 9.500            | 9.500            |
| LNnFP | G2         | PRE-TERM  | 1                | 5  | 9.500                    | 35.34 | 25.36 | 9.621  | 28.16    | 25.09            | 28.70            |
| LNnFP | G2         | PRE-TERM  | 2                | 5  | 9.500                    | 27.64 | 21.92 | 7.700  | 25.44    | 19.47            | 27.56            |
| LNnFP | G2         | PRE-TERM  | 3                | 5  | 9.500                    | 40.83 | 22.95 | 11.60  | 19.24    | 19.18            | 26.02            |
| LNnFP | G2         | PRE-TERM  | 4                | 5  | 9.500                    | 44.75 | 22.72 | 18.17  | 9.500    | 9.500            | 40.34            |
| LNnFP | G2         | PRE-TERM  | 5                | 5  | 9.500                    | 45.15 | 19.60 | 15.66  | 9.500    | 9.500            | 24.35            |
| LNnFP | G2         | PRE-TERM  | 6                | 5  | 9.500                    | 9.500 | 9.50  | 0.0000 | 9.500    | 9.500            | 9.500            |
| LNnFP | G2         | PRE-TERM  | 7                | 5  | 9.500                    | 23.82 | 12.36 | 6.405  | 9.500    | 9.500            | 9.500            |
| LNnFP | G2         | PRE-TERM  | 8                | 5  | 9.500                    | 22.87 | 12.17 | 5.978  | 9.500    | 9.500            | 9.500            |
| LNnFP | G2         | PRE-TERM  | 10               | 4  | 9.500                    | 9.500 | 9.500 | 0.0000 | 9.500    | 9.500            | 9.500            |
| LNnFP | G2         | PRE-TERM  | 12               | 5  | 9.500                    | 9.500 | 9.500 | 0.0000 | 9.500    | 9.500            | 9.500            |
| LNnFP | G2         | PRE-TERM  | 14               | 5  | 9.500                    | 22.67 | 12.13 | 5.891  | 9.500    | 9.500            | 9.500            |
| LNnFP | G2         | PRE-TERM  | 16               | 3  | 9.500                    | 9.500 | 9.500 | 0.0000 | 9.500    | 9.500            | 9.500            |
| LNnFP | G2         | TERM      | 1                | 5  | 21.93                    | 56.56 | 41.13 | 15.45  | 49.07    | 27.31            | 50.79            |
| LNnFP | G2         | TERM      | 2                | 5  | 9.500                    | 32.89 | 22.72 | 12.16  | 29.02    | 9.500            | 32.67            |

**Table S2 Concentration of Human Milk Oligosaccharides in Term or Preterm Milk At Different Weeks Postpartum Separated By Milk Group**

\* When there are results below the method limit of quantification (LoQ) the result has been assigned value of  $0.5 \times \text{LoQ}$ , hence the minimum value appears to be the same in many cases. When a large number of datapoints are below LoQ this can also have the effect that the median = minimum.

| HMO   | Milk Group | Study Arm | Week<br>Post Partum | N | HMO Concentration (mg/L) |       |       |       |          |                     |                     |
|-------|------------|-----------|---------------------|---|--------------------------|-------|-------|-------|----------|---------------------|---------------------|
|       |            |           |                     |   | min *                    | max   | mean  | sd    | median * | Quartile 1<br>(25%) | Quartile 3<br>(75%) |
| LNnFP | G2         | TERM      | 3                   | 5 | 9.500                    | 23.56 | 18.34 | 5.240 | 19.53    | 19.37               | 19.72               |
| LNnFP | G2         | TERM      | 4                   | 5 | 9.500                    | 19.79 | 11.56 | 4.601 | 9.500    | 9.500               | 9.500               |
| LNnFP | G2         | TERM      | 5                   | 5 | 9.500                    | 20.88 | 11.78 | 5.091 | 9.500    | 9.500               | 9.500               |
| LNnFP | G2         | TERM      | 6                   | 5 | 9.500                    | 23.84 | 17.09 | 7.154 | 19.24    | 9.500               | 23.36               |
| LNnFP | G2         | TERM      | 7                   | 5 | 9.500                    | 23.61 | 14.74 | 7.212 | 9.500    | 9.500               | 21.60               |
| LNnFP | G2         | TERM      | 8                   | 5 | 9.500                    | 28.50 | 16.63 | 9.804 | 9.500    | 9.500               | 26.17               |
| LNnFP | G3         | PRE-TERM  | 1                   | 1 | 9.500                    | 9.500 | 9.500 | NA    | 9.500    | 9.500               | 9.500               |
| LNnFP | G3         | PRE-TERM  | 2                   | 1 | 9.500                    | 9.500 | 9.500 | NA    | 9.500    | 9.500               | 9.500               |
| LNnFP | G3         | PRE-TERM  | 3                   | 1 | 9.500                    | 9.500 | 9.500 | NA    | 9.500    | 9.500               | 9.500               |
| LNnFP | G3         | PRE-TERM  | 4                   | 1 | 9.500                    | 9.500 | 9.500 | NA    | 9.500    | 9.500               | 9.500               |
| LNnFP | G3         | PRE-TERM  | 5                   | 1 | 9.500                    | 9.500 | 9.500 | NA    | 9.500    | 9.500               | 9.500               |
| LNnFP | G3         | PRE-TERM  | 6                   | 1 | 9.500                    | 9.500 | 9.500 | NA    | 9.500    | 9.500               | 9.500               |
| LNnFP | G3         | PRE-TERM  | 7                   | 1 | 9.500                    | 9.500 | 9.500 | NA    | 9.500    | 9.500               | 9.500               |
| LNnFP | G3         | PRE-TERM  | 8                   | 1 | 9.500                    | 9.500 | 9.500 | NA    | 9.500    | 9.500               | 9.500               |
| LNnFP | G3         | PRE-TERM  | 10                  | 1 | 9.500                    | 9.500 | 9.500 | NA    | 9.500    | 9.500               | 9.500               |
| LNnFP | G3         | PRE-TERM  | 12                  | 1 | 9.500                    | 9.500 | 9.500 | NA    | 9.500    | 9.500               | 9.500               |
| LNnFP | G3         | PRE-TERM  | 14                  | 1 | 9.500                    | 9.500 | 9.500 | NA    | 9.500    | 9.500               | 9.500               |
| LNnFP | G3         | PRE-TERM  | 16                  | 1 | 9.500                    | 9.500 | 9.500 | NA    | 9.500    | 9.500               | 9.500               |
| LNnFP | G3         | TERM      | 1                   | 1 | 9.500                    | 9.500 | 9.500 | NA    | 9.500    | 9.500               | 9.500               |
| LNnFP | G3         | TERM      | 2                   | 1 | 9.500                    | 9.500 | 9.500 | NA    | 9.500    | 9.500               | 9.500               |
| LNnFP | G3         | TERM      | 3                   | 1 | 9.500                    | 9.500 | 9.500 | NA    | 9.500    | 9.500               | 9.500               |
| LNnFP | G3         | TERM      | 4                   | 1 | 9.500                    | 9.500 | 9.500 | NA    | 9.500    | 9.500               | 9.500               |
| LNnFP | G3         | TERM      | 5                   | 1 | 9.500                    | 9.500 | 9.500 | NA    | 9.500    | 9.500               | 9.500               |
| LNnFP | G3         | TERM      | 6                   | 1 | 9.500                    | 9.500 | 9.500 | NA    | 9.500    | 9.500               | 9.500               |
| LNnFP | G3         | TERM      | 7                   | 1 | 9.500                    | 9.500 | 9.500 | NA    | 9.500    | 9.500               | 9.500               |
| LNnFP | G3         | TERM      | 8                   | 1 | 9.500                    | 9.500 | 9.500 | NA    | 9.500    | 9.500               | 9.500               |
| LNnFP | G4         | TERM      | 1                   | 1 | 9.500                    | 9.500 | 9.500 | NA    | 9.500    | 9.500               | 9.500               |
| LNnFP | G4         | TERM      | 2                   | 1 | 9.500                    | 9.500 | 9.500 | NA    | 9.500    | 9.500               | 9.500               |
| LNnFP | G4         | TERM      | 3                   | 1 | 49.35                    | 49.35 | 49.35 | NA    | 49.35    | 49.35               | 49.35               |
| LNnFP | G4         | TERM      | 4                   | 1 | 40.04                    | 40.04 | 40.04 | NA    | 40.04    | 40.04               | 40.04               |
| LNnFP | G4         | TERM      | 5                   | 1 | 52.21                    | 52.21 | 52.21 | NA    | 52.21    | 52.21               | 52.21               |
| LNnFP | G4         | TERM      | 6                   | 1 | 56.13                    | 56.13 | 56.13 | NA    | 56.13    | 56.13               | 56.13               |
| LNnFP | G4         | TERM      | 7                   | 1 | 37.85                    | 37.85 | 37.85 | NA    | 37.85    | 37.85               | 37.85               |
| LNnFP | G4         | TERM      | 8                   | 1 | 23.06                    | 23.06 | 23.06 | NA    | 23.06    | 23.06               | 23.06               |

**Table S2 Concentration of Human Milk Oligosaccharides in Term or Preterm Milk At Different Weeks Postpartum Separated By Milk Group**

\* When there are results below the method limit of quantification (LoQ) the result has been assigned value of  $0.5 \times \text{LoQ}$ , hence the minimum value appears to be the same in many cases. When a large number of datapoints are below LoQ this can also have the effect that the median = minimum.

| HMO  | Milk Group | Study Arm | Week<br>Post Partum | N  | HMO Concentration (mg/L) |       |       |       |          |                     |                     |
|------|------------|-----------|---------------------|----|--------------------------|-------|-------|-------|----------|---------------------|---------------------|
|      |            |           |                     |    | min *                    | max   | mean  | sd    | median * | Quartile 1<br>(25%) | Quartile 3<br>(75%) |
| LNnT | G1         | PRE-TERM  | 1                   | 19 | 145.7                    | 546.3 | 309.5 | 115.0 | 317.3    | 208.6               | 408.9               |
| LNnT | G1         | PRE-TERM  | 2                   | 19 | 115.9                    | 380.7 | 249.4 | 85.34 | 254.2    | 182.4               | 310.4               |
| LNnT | G1         | PRE-TERM  | 3                   | 19 | 84.09                    | 353.8 | 211.2 | 74.32 | 207.3    | 165.7               | 258.7               |
| LNnT | G1         | PRE-TERM  | 4                   | 18 | 80.52                    | 349.0 | 203.3 | 80.83 | 202.0    | 156.9               | 244.5               |
| LNnT | G1         | PRE-TERM  | 5                   | 19 | 74.63                    | 383.2 | 184.3 | 89.05 | 183.1    | 108.9               | 236.6               |
| LNnT | G1         | PRE-TERM  | 6                   | 18 | 12.00                    | 397.8 | 196.4 | 99.75 | 205.5    | 138.2               | 252.3               |
| LNnT | G1         | PRE-TERM  | 7                   | 18 | 69.59                    | 314.7 | 193.1 | 74.36 | 191.2    | 160.5               | 243.0               |
| LNnT | G1         | PRE-TERM  | 8                   | 18 | 77.62                    | 440.8 | 189.0 | 86.08 | 184.5    | 156.2               | 203.4               |
| LNnT | G1         | PRE-TERM  | 10                  | 18 | 61.39                    | 464.0 | 183.4 | 102.3 | 164.2    | 114.1               | 217.4               |
| LNnT | G1         | PRE-TERM  | 12                  | 15 | 51.86                    | 379.4 | 152.2 | 84.47 | 140.1    | 97.18               | 164.9               |
| LNnT | G1         | PRE-TERM  | 14                  | 15 | 38.26                    | 444.3 | 156.6 | 102.0 | 129.1    | 86.51               | 180.1               |
| LNnT | G1         | PRE-TERM  | 16                  | 15 | 34.77                    | 437.3 | 148.8 | 105.4 | 119.5    | 80.88               | 194.5               |
| LNnT | G1         | TERM      | 1                   | 21 | 190.1                    | 565.3 | 348.6 | 93.32 | 349.8    | 287.9               | 402.6               |
| LNnT | G1         | TERM      | 2                   | 19 | 129.4                    | 475.4 | 256.3 | 93.62 | 252.6    | 201.2               | 272.8               |
| LNnT | G1         | TERM      | 3                   | 21 | 78.28                    | 385.9 | 202.1 | 82.98 | 198.7    | 140.4               | 230.4               |
| LNnT | G1         | TERM      | 4                   | 21 | 74.62                    | 350.3 | 187.5 | 74.72 | 180.4    | 139.2               | 249.7               |
| LNnT | G1         | TERM      | 5                   | 21 | 79.18                    | 369.5 | 176.3 | 80.25 | 146.4    | 116.8               | 225.1               |
| LNnT | G1         | TERM      | 6                   | 20 | 71.86                    | 311.2 | 164.4 | 70.87 | 143.2    | 115.1               | 215.2               |
| LNnT | G1         | TERM      | 7                   | 20 | 52.58                    | 270.0 | 157.1 | 61.32 | 147.5    | 126.4               | 198.7               |
| LNnT | G1         | TERM      | 8                   | 21 | 64.27                    | 284.9 | 145.1 | 66.27 | 131.4    | 88.27               | 186.8               |
| LNnT | G2         | PRE-TERM  | 1                   | 5  | 90.25                    | 257.5 | 151.3 | 66.04 | 137.3    | 106.1               | 165.4               |
| LNnT | G2         | PRE-TERM  | 2                   | 5  | 96.36                    | 190.4 | 141.8 | 36.87 | 150.1    | 115.1               | 156.9               |
| LNnT | G2         | PRE-TERM  | 3                   | 5  | 66.51                    | 192.5 | 128.2 | 48.31 | 136.5    | 97.50               | 147.7               |
| LNnT | G2         | PRE-TERM  | 4                   | 5  | 63.43                    | 179.1 | 102.4 | 49.03 | 79.69    | 66.71               | 123.0               |
| LNnT | G2         | PRE-TERM  | 5                   | 5  | 43.09                    | 112.2 | 74.18 | 30.57 | 67.88    | 48.51               | 99.24               |
| LNnT | G2         | PRE-TERM  | 6                   | 5  | 48.61                    | 118.6 | 80.14 | 27.25 | 68.95    | 68.78               | 95.82               |
| LNnT | G2         | PRE-TERM  | 7                   | 5  | 35.89                    | 112.8 | 73.13 | 31.10 | 60.11    | 59.95               | 96.86               |
| LNnT | G2         | PRE-TERM  | 8                   | 5  | 33.45                    | 103.7 | 64.04 | 32.24 | 54.40    | 36.42               | 92.24               |
| LNnT | G2         | PRE-TERM  | 10                  | 4  | 24.44                    | 77.16 | 45.58 | 24.73 | 40.36    | 26.66               | 59.28               |
| LNnT | G2         | PRE-TERM  | 12                  | 5  | 12.00                    | 66.88 | 42.47 | 20.12 | 47.80    | 37.04               | 48.63               |
| LNnT | G2         | PRE-TERM  | 14                  | 5  | 12.00                    | 70.50 | 39.54 | 20.88 | 38.00    | 35.29               | 41.91               |
| LNnT | G2         | PRE-TERM  | 16                  | 3  | 25.55                    | 39.37 | 32.43 | 6.911 | 32.38    | 28.97               | 35.88               |
| LNnT | G2         | TERM      | 1                   | 5  | 187.1                    | 338.7 | 244.0 | 57.85 | 229.1    | 214.0               | 251.3               |
| LNnT | G2         | TERM      | 2                   | 5  | 113.9                    | 136.8 | 126.7 | 9.685 | 126.2    | 121.2               | 135.6               |

**Table S2 Concentration of Human Milk Oligosaccharides in Term or Preterm Milk At Different Weeks Postpartum Separated By Milk Group**

\* When there are results below the method limit of quantification (LoQ) the result has been assigned value of  $0.5 \times \text{LoQ}$ , hence the minimum value appears to be the same in many cases. When a large number of datapoints are below LoQ this can also have the effect that the median = minimum.

| HMO  | Milk Group | Study Arm | Week Post Partum | N | HMO Concentration (mg/L) |       |       |       |          |                  |                  |
|------|------------|-----------|------------------|---|--------------------------|-------|-------|-------|----------|------------------|------------------|
|      |            |           |                  |   | min *                    | max   | mean  | sd    | median * | Quartile 1 (25%) | Quartile 3 (75%) |
| LNnT | G2         | TERM      | 3                | 5 | 67.58                    | 131.0 | 103.8 | 24.40 | 113.1    | 92.55            | 114.6            |
| LNnT | G2         | TERM      | 4                | 5 | 52.63                    | 129.1 | 90.43 | 31.61 | 82.76    | 71.58            | 116.1            |
| LNnT | G2         | TERM      | 5                | 5 | 51.21                    | 147.0 | 86.26 | 43.95 | 59.76    | 54.25            | 119.1            |
| LNnT | G2         | TERM      | 6                | 5 | 12.00                    | 175.5 | 91.75 | 69.90 | 79.17    | 41.39            | 150.6            |
| LNnT | G2         | TERM      | 7                | 5 | 33.31                    | 141.0 | 84.84 | 52.63 | 76.38    | 35.80            | 137.7            |
| LNnT | G2         | TERM      | 8                | 5 | 27.23                    | 158.7 | 93.23 | 59.99 | 101.7    | 36.11            | 142.4            |
| LNnT | G3         | PRE-TERM  | 1                | 1 | 215.7                    | 215.7 | 215.7 | NA    | 215.7    | 215.7            | 215.7            |
| LNnT | G3         | PRE-TERM  | 2                | 1 | 118.3                    | 118.3 | 118.3 | NA    | 118.3    | 118.3            | 118.3            |
| LNnT | G3         | PRE-TERM  | 3                | 1 | 92.48                    | 92.48 | 92.48 | NA    | 92.48    | 92.48            | 92.48            |
| LNnT | G3         | PRE-TERM  | 4                | 1 | 108.9                    | 108.9 | 108.9 | NA    | 108.9    | 108.9            | 108.9            |
| LNnT | G3         | PRE-TERM  | 5                | 1 | 88.14                    | 88.14 | 88.14 | NA    | 88.14    | 88.14            | 88.14            |
| LNnT | G3         | PRE-TERM  | 6                | 1 | 118.9                    | 118.9 | 118.9 | NA    | 118.9    | 118.9            | 118.9            |
| LNnT | G3         | PRE-TERM  | 7                | 1 | 71.24                    | 71.24 | 71.24 | NA    | 71.24    | 71.24            | 71.24            |
| LNnT | G3         | PRE-TERM  | 8                | 1 | 93.06                    | 93.06 | 93.06 | NA    | 93.06    | 93.06            | 93.06            |
| LNnT | G3         | PRE-TERM  | 10               | 1 | 73.63                    | 73.63 | 73.63 | NA    | 73.63    | 73.63            | 73.63            |
| LNnT | G3         | PRE-TERM  | 12               | 1 | 74.39                    | 74.39 | 74.39 | NA    | 74.39    | 74.39            | 74.39            |
| LNnT | G3         | PRE-TERM  | 14               | 1 | 85.57                    | 85.57 | 85.57 | NA    | 85.57    | 85.57            | 85.57            |
| LNnT | G3         | PRE-TERM  | 16               | 1 | 67.99                    | 67.99 | 67.99 | NA    | 67.99    | 67.99            | 67.99            |
| LNnT | G3         | TERM      | 1                | 1 | 394.6                    | 394.6 | 394.6 | NA    | 394.6    | 394.6            | 394.6            |
| LNnT | G3         | TERM      | 2                | 1 | 162.7                    | 162.7 | 162.7 | NA    | 162.7    | 162.7            | 162.7            |
| LNnT | G3         | TERM      | 3                | 1 | 159.5                    | 159.5 | 159.5 | NA    | 159.5    | 159.5            | 159.5            |
| LNnT | G3         | TERM      | 4                | 1 | 135.3                    | 135.3 | 135.3 | NA    | 135.3    | 135.3            | 135.3            |
| LNnT | G3         | TERM      | 5                | 1 | 129.1                    | 129.1 | 129.1 | NA    | 129.1    | 129.1            | 129.1            |
| LNnT | G3         | TERM      | 6                | 1 | 77.12                    | 77.12 | 77.12 | NA    | 77.12    | 77.12            | 77.12            |
| LNnT | G3         | TERM      | 7                | 1 | 77.74                    | 77.74 | 77.74 | NA    | 77.74    | 77.74            | 77.74            |
| LNnT | G3         | TERM      | 8                | 1 | 101.1                    | 101.1 | 101.1 | NA    | 101.1    | 101.1            | 101.1            |
| LNnT | G4         | TERM      | 1                | 1 | 399.6                    | 399.6 | 399.6 | NA    | 399.6    | 399.6            | 399.6            |
| LNnT | G4         | TERM      | 2                | 1 | 247.5                    | 247.5 | 247.5 | NA    | 247.5    | 247.5            | 247.5            |
| LNnT | G4         | TERM      | 3                | 1 | 183.6                    | 183.6 | 183.6 | NA    | 183.6    | 183.6            | 183.6            |
| LNnT | G4         | TERM      | 4                | 1 | 118.1                    | 118.1 | 118.1 | NA    | 118.1    | 118.1            | 118.1            |
| LNnT | G4         | TERM      | 5                | 1 | 12.00                    | 12.00 | 12.00 | NA    | 12.00    | 12.00            | 12.00            |
| LNnT | G4         | TERM      | 6                | 1 | 76.25                    | 76.25 | 76.25 | NA    | 76.25    | 76.25            | 76.25            |
| LNnT | G4         | TERM      | 7                | 1 | 84.14                    | 84.14 | 84.14 | NA    | 84.14    | 84.14            | 84.14            |
| LNnT | G4         | TERM      | 8                | 1 | 104.1                    | 104.1 | 104.1 | NA    | 104.1    | 104.1            | 104.1            |

**Table S2 Concentration of Human Milk Oligosaccharides in Term or Preterm Milk At Different Weeks Postpartum Separated By Milk Group**

\* When there are results below the method limit of quantification (LoQ) the result has been assigned value of  $0.5 \times \text{LoQ}$ , hence the minimum value appears to be the same in many cases. When a large number of datapoints are below LoQ this can also have the effect that the median = minimum.

| HMO | Milk Group | Study Arm | Week<br>Post Partum | N  | HMO Concentration (mg/L) |      |       |       |          |                     |                     |
|-----|------------|-----------|---------------------|----|--------------------------|------|-------|-------|----------|---------------------|---------------------|
|     |            |           |                     |    | min *                    | max  | mean  | sd    | median * | Quartile 1<br>(25%) | Quartile 3<br>(75%) |
| LNT | G1         | PRE-TERM  | 1                   | 19 | 298.8                    | 2002 | 936.7 | 454.9 | 819.4    | 675.1               | 1086                |
| LNT | G1         | PRE-TERM  | 2                   | 19 | 644.9                    | 2851 | 1306  | 544.9 | 1105     | 957.4               | 1650                |
| LNT | G1         | PRE-TERM  | 3                   | 19 | 510.5                    | 2277 | 1252  | 487.7 | 1167     | 931.7               | 1581                |
| LNT | G1         | PRE-TERM  | 4                   | 18 | 469.1                    | 2737 | 1114  | 553.5 | 1005     | 856.4               | 1320                |
| LNT | G1         | PRE-TERM  | 5                   | 19 | 356.6                    | 2468 | 1050  | 536.4 | 930.7    | 691.2               | 1222                |
| LNT | G1         | PRE-TERM  | 6                   | 18 | 144.1                    | 2428 | 971.2 | 591.2 | 887.5    | 538.8               | 1344                |
| LNT | G1         | PRE-TERM  | 7                   | 18 | 312.8                    | 2198 | 991.0 | 541.7 | 909.3    | 553.7               | 1437                |
| LNT | G1         | PRE-TERM  | 8                   | 18 | 294.8                    | 1960 | 912.6 | 478.9 | 839.9    | 506.7               | 1194                |
| LNT | G1         | PRE-TERM  | 10                  | 18 | 223.6                    | 1829 | 760.5 | 413.2 | 639.8    | 451.7               | 972.7               |
| LNT | G1         | PRE-TERM  | 12                  | 15 | 175.3                    | 1120 | 676.6 | 316.9 | 649.9    | 446.7               | 922.3               |
| LNT | G1         | PRE-TERM  | 14                  | 15 | 232.8                    | 1191 | 651.3 | 297.2 | 675.4    | 439.1               | 822.2               |
| LNT | G1         | PRE-TERM  | 16                  | 15 | 145.2                    | 1057 | 545.3 | 280.6 | 506.5    | 304.1               | 771.4               |
| LNT | G1         | TERM      | 1                   | 21 | 199.8                    | 1434 | 716.8 | 349.1 | 659.2    | 549.4               | 923.2               |
| LNT | G1         | TERM      | 2                   | 19 | 637.9                    | 1760 | 1156  | 302.5 | 1186     | 942.1               | 1347                |
| LNT | G1         | TERM      | 3                   | 21 | 447.8                    | 1924 | 1141  | 392.9 | 1233     | 854.1               | 1376                |
| LNT | G1         | TERM      | 4                   | 21 | 384.6                    | 1862 | 1075  | 382.2 | 1154     | 766.6               | 1282                |
| LNT | G1         | TERM      | 5                   | 21 | 307.2                    | 1894 | 918.3 | 436.8 | 766.7    | 632.9               | 1188                |
| LNT | G1         | TERM      | 6                   | 20 | 280.7                    | 1392 | 856.1 | 375.2 | 850.9    | 586.9               | 1255                |
| LNT | G1         | TERM      | 7                   | 20 | 217.7                    | 1549 | 818.0 | 384.7 | 794.2    | 482.2               | 1129                |
| LNT | G1         | TERM      | 8                   | 21 | 213.7                    | 1567 | 725.2 | 395.1 | 702.4    | 362.2               | 903.7               |
| LNT | G2         | PRE-TERM  | 1                   | 5  | 1428                     | 3029 | 2142  | 587.8 | 2061     | 1901                | 2290                |
| LNT | G2         | PRE-TERM  | 2                   | 5  | 1613                     | 3296 | 2457  | 657.7 | 2537     | 2029                | 2810                |
| LNT | G2         | PRE-TERM  | 3                   | 5  | 1519                     | 2903 | 2259  | 512.0 | 2283     | 2091                | 2498                |
| LNT | G2         | PRE-TERM  | 4                   | 5  | 1854                     | 2397 | 2084  | 278.8 | 1902     | 1887                | 2381                |
| LNT | G2         | PRE-TERM  | 5                   | 5  | 1119                     | 1867 | 1641  | 316.2 | 1825     | 1563                | 1831                |
| LNT | G2         | PRE-TERM  | 6                   | 5  | 1628                     | 2361 | 1910  | 284.0 | 1908     | 1712                | 1942                |
| LNT | G2         | PRE-TERM  | 7                   | 5  | 1110                     | 2376 | 1690  | 471.0 | 1762     | 1428                | 1775                |
| LNT | G2         | PRE-TERM  | 8                   | 5  | 918.0                    | 2184 | 1363  | 502.9 | 1333     | 992.2               | 1389                |
| LNT | G2         | PRE-TERM  | 10                  | 4  | 704.7                    | 1249 | 1018  | 262.8 | 1060     | 850.2               | 1228                |
| LNT | G2         | PRE-TERM  | 12                  | 5  | 312.5                    | 1554 | 1008  | 445.5 | 1051     | 1013                | 1109                |
| LNT | G2         | PRE-TERM  | 14                  | 5  | 401.3                    | 1162 | 739.3 | 319.5 | 775.7    | 447.8               | 909.4               |
| LNT | G2         | PRE-TERM  | 16                  | 3  | 816.9                    | 2113 | 1254  | 744.0 | 831.5    | 824.2               | 1472                |
| LNT | G2         | TERM      | 1                   | 5  | 1130                     | 2478 | 1801  | 584.6 | 1994     | 1253                | 2148                |
| LNT | G2         | TERM      | 2                   | 5  | 1074                     | 2056 | 1702  | 420.4 | 1844     | 1488                | 2050                |

**Table S2 Concentration of Human Milk Oligosaccharides in Term or Preterm Milk At Different Weeks Postpartum Separated By Milk Group**

\* When there are results below the method limit of quantification (LoQ) the result has been assigned value of  $0.5 \times \text{LoQ}$ , hence the minimum value appears to be the same in many cases. When a large number of datapoints are below LoQ this can also have the effect that the median = minimum.

| HMO | Milk Group | Study Arm | Week Post Partum | N | HMO Concentration (mg/L) |       |       |       |          |                  |                  |
|-----|------------|-----------|------------------|---|--------------------------|-------|-------|-------|----------|------------------|------------------|
|     |            |           |                  |   | min *                    | max   | mean  | sd    | median * | Quartile 1 (25%) | Quartile 3 (75%) |
| LNT | G2         | TERM      | 3                | 5 | 904.3                    | 2236  | 1673  | 484.7 | 1766     | 1639             | 1819             |
| LNT | G2         | TERM      | 4                | 5 | 985.8                    | 2354  | 1578  | 547.1 | 1346     | 1294             | 1909             |
| LNT | G2         | TERM      | 5                | 5 | 905.7                    | 2342  | 1447  | 713.8 | 942.4    | 939.1            | 2104             |
| LNT | G2         | TERM      | 6                | 5 | 342.4                    | 1986  | 1143  | 737.4 | 792.0    | 726.0            | 1869             |
| LNT | G2         | TERM      | 7                | 5 | 576.2                    | 1405  | 931.7 | 358.0 | 813.3    | 659.9            | 1204             |
| LNT | G2         | TERM      | 8                | 5 | 454.4                    | 1637  | 1024  | 518.1 | 764.7    | 756.8            | 1509             |
| LNT | G3         | PRE-TERM  | 1                | 1 | 975.2                    | 975.2 | 975.2 | NA    | 975.2    | 975.2            | 975.2            |
| LNT | G3         | PRE-TERM  | 2                | 1 | 965.1                    | 965.1 | 965.1 | NA    | 965.1    | 965.1            | 965.1            |
| LNT | G3         | PRE-TERM  | 3                | 1 | 1112                     | 1112  | 1112  | NA    | 1112     | 1112             | 1112             |
| LNT | G3         | PRE-TERM  | 4                | 1 | 1195                     | 1195  | 1195  | NA    | 1195     | 1195             | 1195             |
| LNT | G3         | PRE-TERM  | 5                | 1 | 880.4                    | 880.4 | 880.4 | NA    | 880.4    | 880.4            | 880.4            |
| LNT | G3         | PRE-TERM  | 6                | 1 | 760.5                    | 760.5 | 760.5 | NA    | 760.5    | 760.5            | 760.5            |
| LNT | G3         | PRE-TERM  | 7                | 1 | 592.7                    | 592.7 | 592.7 | NA    | 592.7    | 592.7            | 592.7            |
| LNT | G3         | PRE-TERM  | 8                | 1 | 659.1                    | 659.1 | 659.1 | NA    | 659.1    | 659.1            | 659.1            |
| LNT | G3         | PRE-TERM  | 10               | 1 | 561.7                    | 561.7 | 561.7 | NA    | 561.7    | 561.7            | 561.7            |
| LNT | G3         | PRE-TERM  | 12               | 1 | 660.0                    | 660.0 | 660.0 | NA    | 660.0    | 660.0            | 660.0            |
| LNT | G3         | PRE-TERM  | 14               | 1 | 586.0                    | 586.0 | 586.0 | NA    | 586.0    | 586.0            | 586.0            |
| LNT | G3         | PRE-TERM  | 16               | 1 | 604.4                    | 604.4 | 604.4 | NA    | 604.4    | 604.4            | 604.4            |
| LNT | G3         | TERM      | 1                | 1 | 359.0                    | 359.0 | 359.0 | NA    | 359.0    | 359.0            | 359.0            |
| LNT | G3         | TERM      | 2                | 1 | 358.7                    | 358.7 | 358.7 | NA    | 358.7    | 358.7            | 358.7            |
| LNT | G3         | TERM      | 3                | 1 | 588.9                    | 588.9 | 588.9 | NA    | 588.9    | 588.9            | 588.9            |
| LNT | G3         | TERM      | 4                | 1 | 484.2                    | 484.2 | 484.2 | NA    | 484.2    | 484.2            | 484.2            |
| LNT | G3         | TERM      | 5                | 1 | 572.1                    | 572.1 | 572.1 | NA    | 572.1    | 572.1            | 572.1            |
| LNT | G3         | TERM      | 6                | 1 | 394.1                    | 394.1 | 394.1 | NA    | 394.1    | 394.1            | 394.1            |
| LNT | G3         | TERM      | 7                | 1 | 417.8                    | 417.8 | 417.8 | NA    | 417.8    | 417.8            | 417.8            |
| LNT | G3         | TERM      | 8                | 1 | 307.1                    | 307.1 | 307.1 | NA    | 307.1    | 307.1            | 307.1            |
| LNT | G4         | TERM      | 1                | 1 | 3400                     | 3400  | 3400  | NA    | 3400     | 3400             | 3400             |
| LNT | G4         | TERM      | 2                | 1 | 3848                     | 3848  | 3848  | NA    | 3848     | 3848             | 3848             |
| LNT | G4         | TERM      | 3                | 1 | 3092                     | 3092  | 3092  | NA    | 3092     | 3092             | 3092             |
| LNT | G4         | TERM      | 4                | 1 | 3087                     | 3087  | 3087  | NA    | 3087     | 3087             | 3087             |
| LNT | G4         | TERM      | 5                | 1 | 2480                     | 2480  | 2480  | NA    | 2480     | 2480             | 2480             |
| LNT | G4         | TERM      | 6                | 1 | 2109                     | 2109  | 2109  | NA    | 2109     | 2109             | 2109             |
| LNT | G4         | TERM      | 7                | 1 | 2251                     | 2251  | 2251  | NA    | 2251     | 2251             | 2251             |
| LNT | G4         | TERM      | 8                | 1 | 1852                     | 1852  | 1852  | NA    | 1852     | 1852             | 1852             |

**Table S2 Concentration of Human Milk Oligosaccharides in Term or Preterm Milk At Different Weeks Postpartum Separated By Milk Group**

*\* When there are results below the method limit of quantification (LoQ) the result has been assigned value of  $0.5 \times \text{LoQ}$ , hence the minimum value appears to be the same in many cases. When a large number of datapoints are below LoQ this can also have the effect that the median = minimum.*

| HMO  | Milk Group | Study Arm | Week Post Partum | N  | HMO Concentration (mg/L) |       |       |       |          |                  |                  |
|------|------------|-----------|------------------|----|--------------------------|-------|-------|-------|----------|------------------|------------------|
|      |            |           |                  |    | min *                    | max   | mean  | sd    | median * | Quartile 1 (25%) | Quartile 3 (75%) |
| LSTb | G1         | PRE-TERM  | 1                | 19 | 44.25                    | 147.8 | 81.29 | 28.49 | 74.27    | 60.42            | 90.22            |
| LSTb | G1         | PRE-TERM  | 2                | 19 | 41.49                    | 211.3 | 97.72 | 42.38 | 93.18    | 72.78            | 109.6            |
| LSTb | G1         | PRE-TERM  | 3                | 19 | 45.44                    | 205.4 | 105.4 | 44.97 | 105.5    | 71.08            | 129.6            |
| LSTb | G1         | PRE-TERM  | 4                | 18 | 47.34                    | 164.8 | 99.56 | 39.42 | 101.0    | 64.86            | 130.3            |
| LSTb | G1         | PRE-TERM  | 5                | 19 | 42.09                    | 240.8 | 104.3 | 50.36 | 101.0    | 53.33            | 133.3            |
| LSTb | G1         | PRE-TERM  | 6                | 18 | 37.86                    | 161.8 | 97.13 | 40.93 | 106.8    | 55.17            | 131.7            |
| LSTb | G1         | PRE-TERM  | 7                | 18 | 36.96                    | 144.9 | 91.64 | 37.36 | 100.7    | 56.31            | 124.0            |
| LSTb | G1         | PRE-TERM  | 8                | 18 | 7.000                    | 191.9 | 88.63 | 46.85 | 87.16    | 51.68            | 119.6            |
| LSTb | G1         | PRE-TERM  | 10               | 18 | 34.87                    | 195.0 | 86.45 | 43.84 | 76.68    | 48.87            | 115.1            |
| LSTb | G1         | PRE-TERM  | 12               | 15 | 31.54                    | 152.7 | 80.35 | 39.36 | 85.94    | 44.70            | 101.0            |
| LSTb | G1         | PRE-TERM  | 14               | 15 | 25.18                    | 113.3 | 75.75 | 25.70 | 78.78    | 64.49            | 90.99            |
| LSTb | G1         | PRE-TERM  | 16               | 15 | 23.33                    | 102.6 | 69.22 | 22.79 | 75.40    | 52.93            | 87.97            |
| LSTb | G1         | TERM      | 1                | 21 | 33.70                    | 141.7 | 72.05 | 27.95 | 68.78    | 50.04            | 89.73            |
| LSTb | G1         | TERM      | 2                | 19 | 28.89                    | 149.1 | 71.39 | 27.42 | 64.19    | 53.50            | 83.47            |
| LSTb | G1         | TERM      | 3                | 21 | 36.75                    | 163.7 | 82.00 | 31.97 | 81.00    | 56.56            | 106.0            |
| LSTb | G1         | TERM      | 4                | 21 | 20.15                    | 136.8 | 80.38 | 32.02 | 77.58    | 57.77            | 106.5            |
| LSTb | G1         | TERM      | 5                | 21 | 21.68                    | 166.6 | 75.44 | 34.27 | 69.84    | 54.18            | 95.80            |
| LSTb | G1         | TERM      | 6                | 20 | 7.000                    | 147.4 | 70.38 | 36.83 | 71.33    | 43.33            | 94.00            |
| LSTb | G1         | TERM      | 7                | 20 | 17.27                    | 177.0 | 80.42 | 41.44 | 72.37    | 54.23            | 107.0            |
| LSTb | G1         | TERM      | 8                | 21 | 7.000                    | 152.6 | 66.20 | 37.54 | 59.12    | 43.19            | 92.50            |
| LSTb | G2         | PRE-TERM  | 1                | 5  | 125.0                    | 219.5 | 173.9 | 36.04 | 183.1    | 153.2            | 188.4            |
| LSTb | G2         | PRE-TERM  | 2                | 5  | 117.2                    | 182.1 | 151.0 | 23.49 | 151.4    | 145.4            | 159.2            |
| LSTb | G2         | PRE-TERM  | 3                | 5  | 110.3                    | 217.4 | 158.2 | 38.68 | 151.3    | 148.0            | 163.7            |
| LSTb | G2         | PRE-TERM  | 4                | 5  | 92.87                    | 256.1 | 160.4 | 68.06 | 156.2    | 100.9            | 195.8            |
| LSTb | G2         | PRE-TERM  | 5                | 5  | 106.0                    | 334.7 | 165.4 | 95.89 | 133.0    | 110.4            | 142.8            |
| LSTb | G2         | PRE-TERM  | 6                | 5  | 96.85                    | 314.7 | 168.0 | 85.29 | 139.1    | 127.5            | 161.7            |
| LSTb | G2         | PRE-TERM  | 7                | 5  | 91.92                    | 423.9 | 173.0 | 142.8 | 100.0    | 92.79            | 156.5            |
| LSTb | G2         | PRE-TERM  | 8                | 5  | 74.62                    | 400.7 | 159.9 | 136.9 | 109.8    | 78.90            | 135.2            |
| LSTb | G2         | PRE-TERM  | 10               | 4  | 66.06                    | 143.0 | 92.98 | 34.29 | 81.43    | 74.37            | 100.0            |
| LSTb | G2         | PRE-TERM  | 12               | 5  | 54.05                    | 405.6 | 147.2 | 148.6 | 80.04    | 55.66            | 140.5            |
| LSTb | G2         | PRE-TERM  | 14               | 5  | 51.40                    | 243.3 | 114.5 | 75.43 | 85.64    | 77.72            | 114.5            |
| LSTb | G2         | PRE-TERM  | 16               | 3  | 43.51                    | 247.3 | 132.6 | 104.3 | 106.9    | 75.22            | 177.1            |
| LSTb | G2         | TERM      | 1                | 5  | 65.94                    | 196.6 | 117.3 | 48.75 | 102.3    | 99.12            | 122.7            |
| LSTb | G2         | TERM      | 2                | 5  | 51.20                    | 108.2 | 82.02 | 24.09 | 73.74    | 72.16            | 104.9            |

**Table S2 Concentration of Human Milk Oligosaccharides in Term or Preterm Milk At Different Weeks Postpartum Separated By Milk Group**

*\* When there are results below the method limit of quantification (LoQ) the result has been assigned value of  $0.5 \times \text{LoQ}$ , hence the minimum value appears to be the same in many cases. When a large number of datapoints are below LoQ this can also have the effect that the median = minimum.*

| HMO  | Milk Group | Study Arm | Week Post Partum | N | HMO Concentration (mg/L) |       |       |       |          |                  |                  |
|------|------------|-----------|------------------|---|--------------------------|-------|-------|-------|----------|------------------|------------------|
|      |            |           |                  |   | min *                    | max   | mean  | sd    | median * | Quartile 1 (25%) | Quartile 3 (75%) |
| LSTb | G2         | TERM      | 3                | 5 | 52.81                    | 124.3 | 86.29 | 30.46 | 83.32    | 61.70            | 109.3            |
| LSTb | G2         | TERM      | 4                | 5 | 42.44                    | 106.8 | 77.16 | 26.43 | 85.80    | 57.67            | 93.06            |
| LSTb | G2         | TERM      | 5                | 5 | 46.78                    | 120.7 | 82.04 | 32.55 | 70.91    | 59.96            | 111.8            |
| LSTb | G2         | TERM      | 6                | 5 | 15.28                    | 141.7 | 81.25 | 47.92 | 83.89    | 58.51            | 106.9            |
| LSTb | G2         | TERM      | 7                | 5 | 27.92                    | 104.2 | 63.27 | 28.55 | 65.64    | 47.10            | 71.49            |
| LSTb | G2         | TERM      | 8                | 5 | 20.65                    | 119.5 | 64.38 | 36.15 | 64.17    | 48.44            | 69.13            |
| LSTb | G3         | PRE-TERM  | 1                | 1 | 97.28                    | 97.28 | 97.28 | NA    | 97.28    | 97.28            | 97.28            |
| LSTb | G3         | PRE-TERM  | 2                | 1 | 161.6                    | 161.6 | 161.6 | NA    | 161.6    | 161.6            | 161.6            |
| LSTb | G3         | PRE-TERM  | 3                | 1 | 151.5                    | 151.5 | 151.5 | NA    | 151.5    | 151.5            | 151.5            |
| LSTb | G3         | PRE-TERM  | 4                | 1 | 107.7                    | 107.7 | 107.7 | NA    | 107.7    | 107.7            | 107.7            |
| LSTb | G3         | PRE-TERM  | 5                | 1 | 86.22                    | 86.22 | 86.22 | NA    | 86.22    | 86.22            | 86.22            |
| LSTb | G3         | PRE-TERM  | 6                | 1 | 67.69                    | 67.69 | 67.69 | NA    | 67.69    | 67.69            | 67.69            |
| LSTb | G3         | PRE-TERM  | 7                | 1 | 59.00                    | 59.00 | 59.00 | NA    | 59.00    | 59.00            | 59.00            |
| LSTb | G3         | PRE-TERM  | 8                | 1 | 54.27                    | 54.27 | 54.27 | NA    | 54.27    | 54.27            | 54.27            |
| LSTb | G3         | PRE-TERM  | 10               | 1 | 42.77                    | 42.77 | 42.77 | NA    | 42.77    | 42.77            | 42.77            |
| LSTb | G3         | PRE-TERM  | 12               | 1 | 52.23                    | 52.23 | 52.23 | NA    | 52.23    | 52.23            | 52.23            |
| LSTb | G3         | PRE-TERM  | 14               | 1 | 53.04                    | 53.04 | 53.04 | NA    | 53.04    | 53.04            | 53.04            |
| LSTb | G3         | PRE-TERM  | 16               | 1 | 53.45                    | 53.45 | 53.45 | NA    | 53.45    | 53.45            | 53.45            |
| LSTb | G3         | TERM      | 1                | 1 | 15.52                    | 15.52 | 15.52 | NA    | 15.52    | 15.52            | 15.52            |
| LSTb | G3         | TERM      | 2                | 1 | 40.88                    | 40.88 | 40.88 | NA    | 40.88    | 40.88            | 40.88            |
| LSTb | G3         | TERM      | 3                | 1 | 46.68                    | 46.68 | 46.68 | NA    | 46.68    | 46.68            | 46.68            |
| LSTb | G3         | TERM      | 4                | 1 | 54.30                    | 54.30 | 54.30 | NA    | 54.30    | 54.30            | 54.30            |
| LSTb | G3         | TERM      | 5                | 1 | 50.89                    | 50.89 | 50.89 | NA    | 50.89    | 50.89            | 50.89            |
| LSTb | G3         | TERM      | 6                | 1 | 46.48                    | 46.48 | 46.48 | NA    | 46.48    | 46.48            | 46.48            |
| LSTb | G3         | TERM      | 7                | 1 | 40.09                    | 40.09 | 40.09 | NA    | 40.09    | 40.09            | 40.09            |
| LSTb | G3         | TERM      | 8                | 1 | 45.28                    | 45.28 | 45.28 | NA    | 45.28    | 45.28            | 45.28            |
| LSTb | G4         | TERM      | 1                | 1 | 168.8                    | 168.8 | 168.8 | NA    | 168.8    | 168.8            | 168.8            |
| LSTb | G4         | TERM      | 2                | 1 | 160.5                    | 160.5 | 160.5 | NA    | 160.5    | 160.5            | 160.5            |
| LSTb | G4         | TERM      | 3                | 1 | 115.0                    | 115.0 | 115.0 | NA    | 115.0    | 115.0            | 115.0            |
| LSTb | G4         | TERM      | 4                | 1 | 124.3                    | 124.3 | 124.3 | NA    | 124.3    | 124.3            | 124.3            |
| LSTb | G4         | TERM      | 5                | 1 | 107.1                    | 107.1 | 107.1 | NA    | 107.1    | 107.1            | 107.1            |
| LSTb | G4         | TERM      | 6                | 1 | 136.3                    | 136.3 | 136.3 | NA    | 136.3    | 136.3            | 136.3            |
| LSTb | G4         | TERM      | 7                | 1 | 100.9                    | 100.9 | 100.9 | NA    | 100.9    | 100.9            | 100.9            |
| LSTb | G4         | TERM      | 8                | 1 | 97.38                    | 97.38 | 97.38 | NA    | 97.38    | 97.38            | 97.38            |



**Table S2 Concentration of Human Milk Oligosaccharides in Term or Preterm Milk At Different Weeks Postpartum Separated By Milk Group**

\* When there are results below the method limit of quantification (LoQ) the result has been assigned value of  $0.5 \times \text{LoQ}$ , hence the minimum value appears to be the same in many cases. When a large number of datapoints are below LoQ this can also have the effect that the median = minimum.

| HMO  | Milk Group | Study Arm | Week Post Partum | N  | HMO Concentration (mg/L) |       |       |       |          |                  |                  |
|------|------------|-----------|------------------|----|--------------------------|-------|-------|-------|----------|------------------|------------------|
|      |            |           |                  |    | min *                    | max   | mean  | sd    | median * | Quartile 1 (25%) | Quartile 3 (75%) |
| LSTc | G1         | PRE-TERM  | 1                | 19 | 95.01                    | 1019  | 464.0 | 259.5 | 505.4    | 220.9            | 616.5            |
| LSTc | G1         | PRE-TERM  | 2                | 19 | 37.98                    | 629.5 | 300.7 | 161.8 | 281.6    | 190.7            | 402.7            |
| LSTc | G1         | PRE-TERM  | 3                | 19 | 31.79                    | 534.2 | 229.8 | 132.9 | 197.8    | 126.0            | 297.7            |
| LSTc | G1         | PRE-TERM  | 4                | 18 | 28.75                    | 622.9 | 208.6 | 141.2 | 179.1    | 107.6            | 276.7            |
| LSTc | G1         | PRE-TERM  | 5                | 19 | 27.29                    | 305.6 | 145.7 | 76.75 | 127.8    | 96.79            | 200.7            |
| LSTc | G1         | PRE-TERM  | 6                | 18 | 20.21                    | 345.5 | 144.0 | 84.65 | 114.4    | 81.71            | 197.1            |
| LSTc | G1         | PRE-TERM  | 7                | 18 | 45.27                    | 371.1 | 123.9 | 79.86 | 103.1    | 61.85            | 172.8            |
| LSTc | G1         | PRE-TERM  | 8                | 18 | 42.87                    | 355.6 | 113.6 | 74.76 | 95.02    | 62.02            | 132.1            |
| LSTc | G1         | PRE-TERM  | 10               | 18 | 26.24                    | 209.1 | 86.09 | 45.87 | 79.03    | 54.54            | 101.8            |
| LSTc | G1         | PRE-TERM  | 12               | 15 | 21.32                    | 125.3 | 64.16 | 27.81 | 55.68    | 45.33            | 82.43            |
| LSTc | G1         | PRE-TERM  | 14               | 15 | 10.91                    | 102.5 | 46.98 | 28.13 | 43.57    | 26.64            | 63.39            |
| LSTc | G1         | PRE-TERM  | 16               | 15 | 9.258                    | 96.78 | 41.10 | 28.59 | 25.54    | 17.91            | 65.12            |
| LSTc | G1         | TERM      | 1                | 21 | 36.80                    | 1199  | 566.7 | 274.0 | 526.0    | 404.9            | 740.6            |
| LSTc | G1         | TERM      | 2                | 19 | 215.4                    | 1169  | 501.9 | 248.2 | 450.7    | 365.0            | 514.0            |
| LSTc | G1         | TERM      | 3                | 21 | 128.1                    | 755.6 | 327.4 | 157.2 | 297.0    | 221.9            | 403.2            |
| LSTc | G1         | TERM      | 4                | 21 | 93.09                    | 524.8 | 237.1 | 108.2 | 217.0    | 153.8            | 301.1            |
| LSTc | G1         | TERM      | 5                | 21 | 82.02                    | 367.7 | 175.9 | 76.20 | 156.4    | 120.9            | 213.3            |
| LSTc | G1         | TERM      | 6                | 20 | 71.57                    | 267.6 | 147.0 | 56.06 | 139.9    | 106.6            | 180.2            |
| LSTc | G1         | TERM      | 7                | 20 | 36.24                    | 271.5 | 124.2 | 65.74 | 105.9    | 77.05            | 138.2            |
| LSTc | G1         | TERM      | 8                | 21 | 30.28                    | 254.8 | 101.9 | 60.84 | 86.97    | 56.35            | 141.6            |
| LSTc | G2         | PRE-TERM  | 1                | 5  | 95.07                    | 693.6 | 294.9 | 236.8 | 184.0    | 182.8            | 318.9            |
| LSTc | G2         | PRE-TERM  | 2                | 5  | 55.00                    | 248.2 | 169.8 | 79.53 | 176.2    | 132.4            | 237.1            |
| LSTc | G2         | PRE-TERM  | 3                | 5  | 41.80                    | 233.7 | 139.4 | 73.08 | 142.3    | 101.3            | 177.8            |
| LSTc | G2         | PRE-TERM  | 4                | 5  | 30.60                    | 129.5 | 87.41 | 36.64 | 97.02    | 78.40            | 101.6            |
| LSTc | G2         | PRE-TERM  | 5                | 5  | 24.49                    | 119.0 | 74.08 | 35.73 | 76.65    | 57.53            | 92.70            |
| LSTc | G2         | PRE-TERM  | 6                | 5  | 23.78                    | 110.0 | 72.49 | 32.75 | 78.48    | 59.87            | 90.38            |
| LSTc | G2         | PRE-TERM  | 7                | 5  | 17.24                    | 90.27 | 52.65 | 28.07 | 51.20    | 36.77            | 67.76            |
| LSTc | G2         | PRE-TERM  | 8                | 5  | 17.82                    | 75.30 | 42.03 | 24.48 | 36.31    | 22.11            | 58.60            |
| LSTc | G2         | PRE-TERM  | 10               | 4  | 28.57                    | 51.70 | 41.82 | 10.16 | 43.50    | 36.84            | 48.48            |
| LSTc | G2         | PRE-TERM  | 12               | 5  | 28.41                    | 43.54 | 34.29 | 5.755 | 33.53    | 30.95            | 35.01            |
| LSTc | G2         | PRE-TERM  | 14               | 5  | 11.60                    | 35.59 | 23.48 | 9.823 | 25.88    | 15.48            | 28.83            |
| LSTc | G2         | PRE-TERM  | 16               | 3  | 18.59                    | 22.43 | 21.03 | 2.117 | 22.05    | 20.32            | 22.24            |
| LSTc | G2         | TERM      | 1                | 5  | 302.5                    | 761.3 | 490.8 | 181.2 | 517.1    | 347.0            | 526.1            |
| LSTc | G2         | TERM      | 2                | 5  | 204.1                    | 398.1 | 303.3 | 74.22 | 316.4    | 260.3            | 337.8            |

**Table S2 Concentration of Human Milk Oligosaccharides in Term or Preterm Milk At Different Weeks Postpartum Separated By Milk Group**

\* When there are results below the method limit of quantification (LoQ) the result has been assigned value of  $0.5 \times \text{LoQ}$ , hence the minimum value appears to be the same in many cases. When a large number of datapoints are below LoQ this can also have the effect that the median = minimum.

| HMO  | Milk Group | Study Arm | Week Post Partum | N | HMO Concentration (mg/L) |       |       |       |          |                  |                  |
|------|------------|-----------|------------------|---|--------------------------|-------|-------|-------|----------|------------------|------------------|
|      |            |           |                  |   | min *                    | max   | mean  | sd    | median * | Quartile 1 (25%) | Quartile 3 (75%) |
| LSTc | G2         | TERM      | 3                | 5 | 103.3                    | 232.6 | 176.0 | 52.82 | 165.2    | 156.2            | 222.6            |
| LSTc | G2         | TERM      | 4                | 5 | 64.34                    | 151.8 | 114.6 | 32.76 | 114.3    | 109.1            | 133.4            |
| LSTc | G2         | TERM      | 5                | 5 | 32.73                    | 129.5 | 86.37 | 37.93 | 86.73    | 69.49            | 113.4            |
| LSTc | G2         | TERM      | 6                | 5 | 30.19                    | 135.6 | 77.95 | 44.31 | 91.63    | 36.34            | 95.98            |
| LSTc | G2         | TERM      | 7                | 5 | 20.07                    | 91.63 | 52.31 | 26.42 | 52.74    | 39.15            | 57.98            |
| LSTc | G2         | TERM      | 8                | 5 | 16.92                    | 86.93 | 47.80 | 25.66 | 43.60    | 37.96            | 53.62            |
| LSTc | G3         | PRE-TERM  | 1                | 1 | 526.1                    | 526.1 | 526.1 | NA    | 526.1    | 526.1            | 526.1            |
| LSTc | G3         | PRE-TERM  | 2                | 1 | 303.7                    | 303.7 | 303.7 | NA    | 303.7    | 303.7            | 303.7            |
| LSTc | G3         | PRE-TERM  | 3                | 1 | 136.2                    | 136.2 | 136.2 | NA    | 136.2    | 136.2            | 136.2            |
| LSTc | G3         | PRE-TERM  | 4                | 1 | 87.33                    | 87.33 | 87.33 | NA    | 87.33    | 87.33            | 87.33            |
| LSTc | G3         | PRE-TERM  | 5                | 1 | 62.73                    | 62.73 | 62.73 | NA    | 62.73    | 62.73            | 62.73            |
| LSTc | G3         | PRE-TERM  | 6                | 1 | 71.54                    | 71.54 | 71.54 | NA    | 71.54    | 71.54            | 71.54            |
| LSTc | G3         | PRE-TERM  | 7                | 1 | 42.20                    | 42.20 | 42.20 | NA    | 42.20    | 42.20            | 42.20            |
| LSTc | G3         | PRE-TERM  | 8                | 1 | 38.50                    | 38.50 | 38.50 | NA    | 38.50    | 38.50            | 38.50            |
| LSTc | G3         | PRE-TERM  | 10               | 1 | 24.55                    | 24.55 | 24.55 | NA    | 24.55    | 24.55            | 24.55            |
| LSTc | G3         | PRE-TERM  | 12               | 1 | 20.28                    | 20.28 | 20.28 | NA    | 20.28    | 20.28            | 20.28            |
| LSTc | G3         | PRE-TERM  | 14               | 1 | 24.47                    | 24.47 | 24.47 | NA    | 24.47    | 24.47            | 24.47            |
| LSTc | G3         | PRE-TERM  | 16               | 1 | 17.33                    | 17.33 | 17.33 | NA    | 17.33    | 17.33            | 17.33            |
| LSTc | G3         | TERM      | 1                | 1 | 853.8                    | 853.8 | 853.8 | NA    | 853.8    | 853.8            | 853.8            |
| LSTc | G3         | TERM      | 2                | 1 | 298.2                    | 298.2 | 298.2 | NA    | 298.2    | 298.2            | 298.2            |
| LSTc | G3         | TERM      | 3                | 1 | 193.2                    | 193.2 | 193.2 | NA    | 193.2    | 193.2            | 193.2            |
| LSTc | G3         | TERM      | 4                | 1 | 139.1                    | 139.1 | 139.1 | NA    | 139.1    | 139.1            | 139.1            |
| LSTc | G3         | TERM      | 5                | 1 | 97.32                    | 97.32 | 97.32 | NA    | 97.32    | 97.32            | 97.32            |
| LSTc | G3         | TERM      | 6                | 1 | 73.72                    | 73.72 | 73.72 | NA    | 73.72    | 73.72            | 73.72            |
| LSTc | G3         | TERM      | 7                | 1 | 62.70                    | 62.70 | 62.70 | NA    | 62.70    | 62.70            | 62.70            |
| LSTc | G3         | TERM      | 8                | 1 | 76.90                    | 76.90 | 76.90 | NA    | 76.90    | 76.90            | 76.90            |
| LSTc | G4         | TERM      | 1                | 1 | 979.8                    | 979.8 | 979.8 | NA    | 979.8    | 979.8            | 979.8            |
| LSTc | G4         | TERM      | 2                | 1 | 1156                     | 1156  | 1156  | NA    | 1156     | 1156             | 1156             |
| LSTc | G4         | TERM      | 3                | 1 | 620.3                    | 620.3 | 620.3 | NA    | 620.3    | 620.3            | 620.3            |
| LSTc | G4         | TERM      | 4                | 1 | 346.2                    | 346.2 | 346.2 | NA    | 346.2    | 346.2            | 346.2            |
| LSTc | G4         | TERM      | 5                | 1 | 188.7                    | 188.7 | 188.7 | NA    | 188.7    | 188.7            | 188.7            |
| LSTc | G4         | TERM      | 6                | 1 | 160.6                    | 160.6 | 160.6 | NA    | 160.6    | 160.6            | 160.6            |
| LSTc | G4         | TERM      | 7                | 1 | 96.53                    | 96.53 | 96.53 | NA    | 96.53    | 96.53            | 96.53            |
| LSTc | G4         | TERM      | 8                | 1 | 57.77                    | 57.77 | 57.77 | NA    | 57.77    | 57.77            | 57.77            |

**Table S2 Concentration of Human Milk Oligosaccharides in Term or Preterm Milk At Different Weeks Postpartum Separated By Milk Group**

*\* When there are results below the method limit of quantification (LoQ) the result has been assigned value of  $0.5 \times \text{LoQ}$ , hence the minimum value appears to be the same in many cases. When a large number of datapoints are below LoQ this can also have the effect that the median = minimum.*

| HMO       | Milk Group | Study Arm | Week Post Partum | N  | HMO Concentration (mg/L) |       |       |       |          |                  |                  |
|-----------|------------|-----------|------------------|----|--------------------------|-------|-------|-------|----------|------------------|------------------|
|           |            |           |                  |    | min *                    | max   | mean  | sd    | median * | Quartile 1 (25%) | Quartile 3 (75%) |
| MFLNH-III | G1         | PRE-TERM  | 1                | 19 | 70.38                    | 548.6 | 248.6 | 139.4 | 221.4    | 141.2            | 317.6            |
| MFLNH-III | G1         | PRE-TERM  | 2                | 19 | 58.75                    | 649.8 | 357.7 | 153.4 | 336.7    | 260.5            | 458.2            |
| MFLNH-III | G1         | PRE-TERM  | 3                | 19 | 64.26                    | 663.0 | 347.8 | 149.2 | 355.2    | 262.4            | 415.4            |
| MFLNH-III | G1         | PRE-TERM  | 4                | 18 | 65.81                    | 604.0 | 313.6 | 143.3 | 331.7    | 228.6            | 392.0            |
| MFLNH-III | G1         | PRE-TERM  | 5                | 19 | 57.17                    | 445.5 | 248.8 | 108.8 | 253.2    | 185.9            | 317.8            |
| MFLNH-III | G1         | PRE-TERM  | 6                | 18 | 87.89                    | 422.1 | 230.9 | 91.09 | 221.8    | 187.1            | 275.3            |
| MFLNH-III | G1         | PRE-TERM  | 7                | 18 | 79.18                    | 400.7 | 221.3 | 92.75 | 206.7    | 157.7            | 285.2            |
| MFLNH-III | G1         | PRE-TERM  | 8                | 18 | 64.97                    | 420.5 | 210.2 | 106.1 | 192.8    | 134.1            | 269.7            |
| MFLNH-III | G1         | PRE-TERM  | 10               | 18 | 53.68                    | 321.8 | 146.2 | 80.43 | 135.8    | 85.01            | 162.6            |
| MFLNH-III | G1         | PRE-TERM  | 12               | 15 | 17.50                    | 323.4 | 115.2 | 74.22 | 109.8    | 66.07            | 141.9            |
| MFLNH-III | G1         | PRE-TERM  | 14               | 15 | 17.50                    | 215.4 | 101.4 | 51.18 | 96.61    | 70.10            | 116.2            |
| MFLNH-III | G1         | PRE-TERM  | 16               | 15 | 17.50                    | 193.4 | 80.91 | 51.04 | 79.62    | 48.33            | 88.04            |
| MFLNH-III | G1         | TERM      | 1                | 21 | 17.50                    | 469.8 | 186.9 | 118.6 | 152.2    | 121.3            | 211.7            |
| MFLNH-III | G1         | TERM      | 2                | 19 | 180.0                    | 613.8 | 358.8 | 115.7 | 337.0    | 292.2            | 419.0            |
| MFLNH-III | G1         | TERM      | 3                | 21 | 166.7                    | 578.2 | 356.5 | 108.0 | 340.7    | 302.1            | 399.4            |
| MFLNH-III | G1         | TERM      | 4                | 21 | 121.1                    | 505.6 | 335.8 | 101.5 | 332.1    | 289.1            | 408.7            |
| MFLNH-III | G1         | TERM      | 5                | 21 | 81.47                    | 532.2 | 282.5 | 112.9 | 295.6    | 202.5            | 362.1            |
| MFLNH-III | G1         | TERM      | 6                | 20 | 17.50                    | 425.6 | 257.5 | 91.58 | 279.3    | 218.5            | 291.9            |
| MFLNH-III | G1         | TERM      | 7                | 20 | 17.50                    | 417.6 | 209.8 | 87.48 | 200.0    | 150.6            | 266.6            |
| MFLNH-III | G1         | TERM      | 8                | 21 | 17.50                    | 443.9 | 192.5 | 99.88 | 173.3    | 139.7            | 233.4            |
| MFLNH-III | G2         | PRE-TERM  | 1                | 5  | 166.0                    | 327.0 | 237.4 | 76.50 | 194.1    | 186.2            | 313.5            |
| MFLNH-III | G2         | PRE-TERM  | 2                | 5  | 147.0                    | 714.1 | 441.3 | 208.0 | 437.6    | 377.6            | 530.3            |
| MFLNH-III | G2         | PRE-TERM  | 3                | 5  | 165.4                    | 790.5 | 510.6 | 258.6 | 517.0    | 355.5            | 724.8            |
| MFLNH-III | G2         | PRE-TERM  | 4                | 5  | 141.6                    | 743.2 | 487.0 | 229.5 | 454.7    | 454.4            | 640.9            |
| MFLNH-III | G2         | PRE-TERM  | 5                | 5  | 101.4                    | 820.2 | 411.6 | 258.5 | 385.5    | 354.1            | 397.0            |
| MFLNH-III | G2         | PRE-TERM  | 6                | 5  | 116.0                    | 856.2 | 456.5 | 272.1 | 438.0    | 337.9            | 534.3            |
| MFLNH-III | G2         | PRE-TERM  | 7                | 5  | 77.34                    | 745.1 | 419.2 | 247.3 | 476.4    | 304.9            | 492.1            |
| MFLNH-III | G2         | PRE-TERM  | 8                | 5  | 66.95                    | 753.0 | 355.4 | 253.9 | 286.7    | 261.1            | 409.3            |
| MFLNH-III | G2         | PRE-TERM  | 10               | 4  | 221.7                    | 707.1 | 363.4 | 230.3 | 262.4    | 239.6            | 386.2            |
| MFLNH-III | G2         | PRE-TERM  | 12               | 5  | 58.13                    | 551.6 | 224.3 | 204.0 | 144.9    | 78.50            | 288.3            |
| MFLNH-III | G2         | PRE-TERM  | 14               | 5  | 50.63                    | 386.3 | 173.5 | 167.4 | 53.20    | 53.16            | 324.5            |
| MFLNH-III | G2         | PRE-TERM  | 16               | 3  | 123.9                    | 337.9 | 231.2 | 107.0 | 231.9    | 177.9            | 284.9            |
| MFLNH-III | G2         | TERM      | 1                | 5  | 17.50                    | 385.1 | 200.1 | 139.4 | 169.0    | 148.4            | 280.6            |
| MFLNH-III | G2         | TERM      | 2                | 5  | 326.4                    | 772.4 | 610.4 | 174.6 | 685.0    | 569.1            | 699.1            |

**Table S2 Concentration of Human Milk Oligosaccharides in Term or Preterm Milk At Different Weeks Postpartum Separated By Milk Group**

*\* When there are results below the method limit of quantification (LoQ) the result has been assigned value of  $0.5 \times \text{LoQ}$ , hence the minimum value appears to be the same in many cases. When a large number of datapoints are below LoQ this can also have the effect that the median = minimum.*

| HMO       | Milk Group | Study Arm | Week<br>Post Partum | N | HMO Concentration (mg/L) |       |       |       |          |                     |                     |
|-----------|------------|-----------|---------------------|---|--------------------------|-------|-------|-------|----------|---------------------|---------------------|
|           |            |           |                     |   | min *                    | max   | mean  | sd    | median * | Quartile 1<br>(25%) | Quartile 3<br>(75%) |
| MFLNH-III | G2         | TERM      | 3                   | 5 | 312.8                    | 861.7 | 678.7 | 212.3 | 751.9    | 706.1               | 761.1               |
| MFLNH-III | G2         | TERM      | 4                   | 5 | 339.0                    | 976.4 | 734.2 | 239.2 | 806.8    | 722.0               | 826.8               |
| MFLNH-III | G2         | TERM      | 5                   | 5 | 222.9                    | 886.4 | 598.6 | 238.2 | 620.9    | 617.0               | 645.6               |
| MFLNH-III | G2         | TERM      | 6                   | 5 | 194.8                    | 758.8 | 416.2 | 217.5 | 393.8    | 273.3               | 460.5               |
| MFLNH-III | G2         | TERM      | 7                   | 5 | 17.50                    | 600.2 | 320.7 | 236.4 | 409.7    | 140.6               | 435.4               |
| MFLNH-III | G2         | TERM      | 8                   | 5 | 163.9                    | 875.6 | 428.6 | 267.2 | 382.4    | 314.1               | 407.1               |
| MFLNH-III | G3         | PRE-TERM  | 1                   | 1 | 452.0                    | 452.0 | 452.0 | NA    | 452.0    | 452.0               | 452.0               |
| MFLNH-III | G3         | PRE-TERM  | 2                   | 1 | 330.7                    | 330.7 | 330.7 | NA    | 330.7    | 330.7               | 330.7               |
| MFLNH-III | G3         | PRE-TERM  | 3                   | 1 | 314.2                    | 314.2 | 314.2 | NA    | 314.2    | 314.2               | 314.2               |
| MFLNH-III | G3         | PRE-TERM  | 4                   | 1 | 467.1                    | 467.1 | 467.1 | NA    | 467.1    | 467.1               | 467.1               |
| MFLNH-III | G3         | PRE-TERM  | 5                   | 1 | 454.7                    | 454.7 | 454.7 | NA    | 454.7    | 454.7               | 454.7               |
| MFLNH-III | G3         | PRE-TERM  | 6                   | 1 | 443.4                    | 443.4 | 443.4 | NA    | 443.4    | 443.4               | 443.4               |
| MFLNH-III | G3         | PRE-TERM  | 7                   | 1 | 370.4                    | 370.4 | 370.4 | NA    | 370.4    | 370.4               | 370.4               |
| MFLNH-III | G3         | PRE-TERM  | 8                   | 1 | 334.9                    | 334.9 | 334.9 | NA    | 334.9    | 334.9               | 334.9               |
| MFLNH-III | G3         | PRE-TERM  | 10                  | 1 | 246.6                    | 246.6 | 246.6 | NA    | 246.6    | 246.6               | 246.6               |
| MFLNH-III | G3         | PRE-TERM  | 12                  | 1 | 180.9                    | 180.9 | 180.9 | NA    | 180.9    | 180.9               | 180.9               |
| MFLNH-III | G3         | PRE-TERM  | 14                  | 1 | 140.0                    | 140.0 | 140.0 | NA    | 140.0    | 140.0               | 140.0               |
| MFLNH-III | G3         | PRE-TERM  | 16                  | 1 | 102.0                    | 102.0 | 102.0 | NA    | 102.0    | 102.0               | 102.0               |
| MFLNH-III | G3         | TERM      | 1                   | 1 | 524.0                    | 524.0 | 524.0 | NA    | 524.0    | 524.0               | 524.0               |
| MFLNH-III | G3         | TERM      | 2                   | 1 | 493.2                    | 493.2 | 493.2 | NA    | 493.2    | 493.2               | 493.2               |
| MFLNH-III | G3         | TERM      | 3                   | 1 | 593.9                    | 593.9 | 593.9 | NA    | 593.9    | 593.9               | 593.9               |
| MFLNH-III | G3         | TERM      | 4                   | 1 | 496.9                    | 496.9 | 496.9 | NA    | 496.9    | 496.9               | 496.9               |
| MFLNH-III | G3         | TERM      | 5                   | 1 | 574.6                    | 574.6 | 574.6 | NA    | 574.6    | 574.6               | 574.6               |
| MFLNH-III | G3         | TERM      | 6                   | 1 | 355.1                    | 355.1 | 355.1 | NA    | 355.1    | 355.1               | 355.1               |
| MFLNH-III | G3         | TERM      | 7                   | 1 | 369.9                    | 369.9 | 369.9 | NA    | 369.9    | 369.9               | 369.9               |
| MFLNH-III | G3         | TERM      | 8                   | 1 | 299.2                    | 299.2 | 299.2 | NA    | 299.2    | 299.2               | 299.2               |
| MFLNH-III | G4         | TERM      | 1                   | 1 | 189.9                    | 189.9 | 189.9 | NA    | 189.9    | 189.9               | 189.9               |
| MFLNH-III | G4         | TERM      | 2                   | 1 | 695.9                    | 695.9 | 695.9 | NA    | 695.9    | 695.9               | 695.9               |
| MFLNH-III | G4         | TERM      | 3                   | 1 | 934.4                    | 934.4 | 934.4 | NA    | 934.4    | 934.4               | 934.4               |
| MFLNH-III | G4         | TERM      | 4                   | 1 | 895.2                    | 895.2 | 895.2 | NA    | 895.2    | 895.2               | 895.2               |
| MFLNH-III | G4         | TERM      | 5                   | 1 | 872.4                    | 872.4 | 872.4 | NA    | 872.4    | 872.4               | 872.4               |
| MFLNH-III | G4         | TERM      | 6                   | 1 | 513.6                    | 513.6 | 513.6 | NA    | 513.6    | 513.6               | 513.6               |
| MFLNH-III | G4         | TERM      | 7                   | 1 | 571.8                    | 571.8 | 571.8 | NA    | 571.8    | 571.8               | 571.8               |
| MFLNH-III | G4         | TERM      | 8                   | 1 | 427.0                    | 427.0 | 427.0 | NA    | 427.0    | 427.0               | 427.0               |
