# Supplementary material for: Human Milk Oligosaccharides in the Milk of Mothers Delivering Term versus Preterm Infants
Source: MDPI journal article supplement (doi:10.3390/nu11061282), 2019-06-05
Supplement: s1 [file s1]

**Table S4 Concentration of Human Milk Oligosaccharides in Term or Preterm Milk At Specified Postmenstrual Age Separated By Milk Group**

\* When there are results below the method limit of quantification (LoQ) the result has been assigned value of  $0.5 \times \text{LoQ}$ , hence the minimum value appears to be the same in many cases. When a large number of datapoints are below LoQ this can also have the effect that the median = minimum.

| HMO  | Milk Group | Study Arm | Postmenstrual Age (weeks) | N  | HMO Concentration (mg/L) |       |       |       |          |                  |                  |
|------|------------|-----------|---------------------------|----|--------------------------|-------|-------|-------|----------|------------------|------------------|
|      |            |           |                           |    | min *                    | max   | mean  | sd    | median * | Quartile 1 (25%) | Quartile 3 (75%) |
| 2'FL | G1         | PRE-TERM  | 30                        | 7  | 53.00                    | 3958  | 2873  | 1332  | 3370     | 2859             | 3506             |
| 2'FL | G1         | PRE-TERM  | 31                        | 9  | 68.21                    | 3798  | 2092  | 1016  | 2333     | 1959             | 2382             |
| 2'FL | G1         | PRE-TERM  | 32                        | 13 | 40.96                    | 4196  | 2294  | 1187  | 2089     | 1723             | 3095             |
| 2'FL | G1         | PRE-TERM  | 33                        | 18 | 35.03                    | 5478  | 2367  | 1175  | 2372     | 1637             | 2728             |
| 2'FL | G1         | PRE-TERM  | 34                        | 19 | 37.54                    | 3592  | 1979  | 853.8 | 1834     | 1527             | 2758             |
| 2'FL | G1         | PRE-TERM  | 35                        | 18 | 32.13                    | 2996  | 1847  | 726.6 | 1844     | 1573             | 2348             |
| 2'FL | G1         | PRE-TERM  | 36                        | 19 | 30.17                    | 3088  | 1931  | 755.9 | 1846     | 1665             | 2418             |
| 2'FL | G1         | PRE-TERM  | 37                        | 18 | 27.93                    | 3335  | 1895  | 770.8 | 1797     | 1539             | 2317             |
| 2'FL | G1         | PRE-TERM  | 38                        | 11 | 250.1                    | 3006  | 2136  | 810.5 | 2199     | 1801             | 2723             |
| 2'FL | G1         | PRE-TERM  | 39                        | 16 | 22.31                    | 3151  | 1846  | 840.2 | 1656     | 1332             | 2509             |
| 2'FL | G1         | PRE-TERM  | 40                        | 7  | 951.5                    | 3353  | 2090  | 849.6 | 1740     | 1576             | 2717             |
| 2'FL | G1         | PRE-TERM  | 41                        | 12 | 19.65                    | 3574  | 1966  | 965.0 | 1908     | 1430             | 2460             |
| 2'FL | G1         | PRE-TERM  | 42                        | 6  | 861.6                    | 2926  | 1841  | 835.4 | 1507     | 1436             | 2501             |
| 2'FL | G1         | PRE-TERM  | 43                        | 10 | 32.90                    | 2847  | 1627  | 788.9 | 1658     | 1224             | 2066             |
| 2'FL | G1         | PRE-TERM  | 44                        | 5  | 671.4                    | 2687  | 1652  | 779.5 | 1529     | 1252             | 2124             |
| 2'FL | G1         | PRE-TERM  | 45                        | 9  | 30.28                    | 2198  | 1385  | 737.2 | 1421     | 924.1            | 2096             |
| 2'FL | G1         | PRE-TERM  | 46                        | 6  | 716.4                    | 2946  | 1840  | 865.4 | 1720     | 1294             | 2517             |
| 2'FL | G1         | PRE-TERM  | 47                        | 3  | 956.7                    | 2203  | 1753  | 691.7 | 2099     | 1528             | 2151             |
| 2'FL | G1         | PRE-TERM  | 48                        | 4  | 625.6                    | 3455  | 1778  | 1195  | 1515     | 1252             | 2040             |
| 2'FL | G1         | TERM      | 38                        | 2  | 3186                     | 4230  | 3708  | 738.3 | 3708     | 3447             | 3969             |
| 2'FL | G1         | TERM      | 39                        | 9  | 2269                     | 5570  | 3847  | 1360  | 3491     | 2571             | 4999             |
| 2'FL | G1         | TERM      | 40                        | 13 | 1676                     | 4305  | 2966  | 726.5 | 3113     | 2302             | 3420             |
| 2'FL | G1         | TERM      | 41                        | 21 | 1518                     | 4950  | 2915  | 980.5 | 2760     | 2140             | 3199             |
| 2'FL | G1         | TERM      | 42                        | 21 | 1387                     | 3876  | 2553  | 666.4 | 2461     | 1977             | 3082             |
| 2'FL | G1         | TERM      | 43                        | 21 | 1325                     | 4225  | 2463  | 787.2 | 2482     | 1682             | 2870             |
| 2'FL | G1         | TERM      | 44                        | 20 | 1028                     | 3370  | 2262  | 741.9 | 2221     | 1580             | 3003             |
| 2'FL | G1         | TERM      | 45                        | 21 | 622.0                    | 3962  | 2243  | 885.2 | 2242     | 1739             | 3007             |
| 2'FL | G1         | TERM      | 46                        | 17 | 241.7                    | 3099  | 2063  | 789.4 | 2151     | 1617             | 2719             |
| 2'FL | G1         | TERM      | 47                        | 12 | 715.0                    | 3067  | 2184  | 792.9 | 2271     | 1529             | 2941             |
| 2'FL | G1         | TERM      | 48                        | 6  | 1399                     | 3201  | 2557  | 670.5 | 2785     | 2292             | 2981             |
| 2'FL | G2         | PRE-TERM  | 29                        | 1  | 35.03                    | 35.03 | 35.03 | NA    | 35.03    | 35.03            | 35.03            |
| 2'FL | G2         | PRE-TERM  | 30                        | 2  | 21.88                    | 26.98 | 24.43 | 3.606 | 24.43    | 23.16            | 25.71            |
| 2'FL | G2         | PRE-TERM  | 31                        | 2  | 6.500                    | 18.12 | 12.31 | 8.215 | 12.31    | 9.405            | 15.21            |
| 2'FL | G2         | PRE-TERM  | 32                        | 3  | 6.500                    | 116.4 | 45.55 | 61.46 | 13.76    | 10.13            | 65.07            |
| 2'FL | G2         | PRE-TERM  | 33                        | 5  | 6.500                    | 48.64 | 23.04 | 22.66 | 6.500    | 6.500            | 47.07            |
| 2'FL | G2         | PRE-TERM  | 34                        | 5  | 6.500                    | 30.75 | 12.69 | 10.50 | 6.500    | 6.500            | 13.19            |

**Table S4 Concentration of Human Milk Oligosaccharides in Term or Preterm Milk At Specified Postmenstrual Age Separated By Milk Group**

\* When there are results below the method limit of quantification (LoQ) the result has been assigned value of  $0.5 \times \text{LoQ}$ , hence the minimum value appears to be the same in many cases. When a large number of datapoints are below LoQ this can also have the effect that the median = minimum.

| HMO  | Milk Group | Study Arm | Postmenstrual Age (weeks) | N | HMO Concentration (mg/L) |       |       |        |          |                  |                  |
|------|------------|-----------|---------------------------|---|--------------------------|-------|-------|--------|----------|------------------|------------------|
|      |            |           |                           |   | min *                    | max   | mean  | sd     | median * | Quartile 1 (25%) | Quartile 3 (75%) |
| 2'FL | G2         | PRE-TERM  | 35                        | 5 | 6.500                    | 26.23 | 10.45 | 8.824  | 6.500    | 6.500            | 6.500            |
| 2'FL | G2         | PRE-TERM  | 36                        | 5 | 6.500                    | 22.44 | 9.689 | 7.131  | 6.500    | 6.500            | 6.500            |
| 2'FL | G2         | PRE-TERM  | 37                        | 4 | 6.500                    | 6.500 | 6.500 | 0.0000 | 6.500    | 6.500            | 6.500            |
| 2'FL | G2         | PRE-TERM  | 38                        | 4 | 6.500                    | 20.67 | 10.04 | 7.083  | 6.500    | 6.500            | 10.04            |
| 2'FL | G2         | PRE-TERM  | 39                        | 3 | 6.500                    | 6.500 | 6.500 | 0.0000 | 6.500    | 6.500            | 6.500            |
| 2'FL | G2         | PRE-TERM  | 40                        | 3 | 6.500                    | 18.86 | 10.62 | 7.137  | 6.500    | 6.500            | 12.68            |
| 2'FL | G2         | PRE-TERM  | 41                        | 2 | 6.500                    | 6.500 | 6.500 | 0.0000 | 6.500    | 6.500            | 6.500            |
| 2'FL | G2         | PRE-TERM  | 42                        | 3 | 6.500                    | 16.58 | 9.861 | 5.821  | 6.500    | 6.500            | 11.54            |
| 2'FL | G2         | PRE-TERM  | 43                        | 2 | 6.500                    | 6.500 | 6.500 | 0.0000 | 6.500    | 6.500            | 6.500            |
| 2'FL | G2         | PRE-TERM  | 44                        | 3 | 6.500                    | 15.22 | 9.406 | 5.034  | 6.500    | 6.500            | 10.86            |
| 2'FL | G2         | PRE-TERM  | 45                        | 2 | 6.500                    | 6.500 | 6.500 | 0.0000 | 6.500    | 6.500            | 6.500            |
| 2'FL | G2         | PRE-TERM  | 46                        | 2 | 6.500                    | 6.500 | 6.500 | 0.0000 | 6.500    | 6.500            | 6.500            |
| 2'FL | G2         | PRE-TERM  | 48                        | 1 | 6.500                    | 6.500 | 6.500 | NA     | 6.500    | 6.500            | 6.500            |
| 2'FL | G2         | TERM      | 39                        | 1 | 6.500                    | 6.500 | 6.500 | NA     | 6.500    | 6.500            | 6.500            |
| 2'FL | G2         | TERM      | 40                        | 5 | 6.500                    | 25.68 | 10.34 | 8.578  | 6.500    | 6.500            | 6.500            |
| 2'FL | G2         | TERM      | 41                        | 4 | 6.500                    | 6.500 | 6.500 | 0.0000 | 6.500    | 6.500            | 6.500            |
| 2'FL | G2         | TERM      | 42                        | 6 | 6.500                    | 6.500 | 6.500 | 0.0000 | 6.500    | 6.500            | 6.500            |
| 2'FL | G2         | TERM      | 43                        | 5 | 6.500                    | 14.11 | 8.023 | 3.405  | 6.500    | 6.500            | 6.500            |
| 2'FL | G2         | TERM      | 44                        | 5 | 6.500                    | 6.500 | 6.500 | 0.0000 | 6.500    | 6.500            | 6.500            |
| 2'FL | G2         | TERM      | 45                        | 5 | 6.500                    | 6.500 | 6.500 | 0.0000 | 6.500    | 6.500            | 6.500            |
| 2'FL | G2         | TERM      | 46                        | 5 | 6.500                    | 6.500 | 6.500 | 0.0000 | 6.500    | 6.500            | 6.500            |
| 2'FL | G2         | TERM      | 47                        | 4 | 6.500                    | 6.500 | 6.500 | 0.0000 | 6.500    | 6.500            | 6.500            |
| 2'FL | G3         | PRE-TERM  | 30                        | 1 | 3314                     | 3314  | 3314  | NA     | 3314     | 3314             | 3314             |
| 2'FL | G3         | PRE-TERM  | 31                        | 1 | 3465                     | 3465  | 3465  | NA     | 3465     | 3465             | 3465             |
| 2'FL | G3         | PRE-TERM  | 32                        | 1 | 2900                     | 2900  | 2900  | NA     | 2900     | 2900             | 2900             |
| 2'FL | G3         | PRE-TERM  | 33                        | 1 | 2645                     | 2645  | 2645  | NA     | 2645     | 2645             | 2645             |
| 2'FL | G3         | PRE-TERM  | 34                        | 1 | 3001                     | 3001  | 3001  | NA     | 3001     | 3001             | 3001             |
| 2'FL | G3         | PRE-TERM  | 35                        | 1 | 3071                     | 3071  | 3071  | NA     | 3071     | 3071             | 3071             |
| 2'FL | G3         | PRE-TERM  | 36                        | 1 | 2571                     | 2571  | 2571  | NA     | 2571     | 2571             | 2571             |
| 2'FL | G3         | PRE-TERM  | 37                        | 1 | 2316                     | 2316  | 2316  | NA     | 2316     | 2316             | 2316             |
| 2'FL | G3         | PRE-TERM  | 39                        | 1 | 2139                     | 2139  | 2139  | NA     | 2139     | 2139             | 2139             |
| 2'FL | G3         | PRE-TERM  | 41                        | 1 | 2079                     | 2079  | 2079  | NA     | 2079     | 2079             | 2079             |
| 2'FL | G3         | PRE-TERM  | 43                        | 1 | 2189                     | 2189  | 2189  | NA     | 2189     | 2189             | 2189             |
| 2'FL | G3         | PRE-TERM  | 45                        | 1 | 2024                     | 2024  | 2024  | NA     | 2024     | 2024             | 2024             |
| 2'FL | G3         | TERM      | 41                        | 1 | 6076                     | 6076  | 6076  | NA     | 6076     | 6076             | 6076             |
| 2'FL | G3         | TERM      | 42                        | 1 | 5572                     | 5572  | 5572  | NA     | 5572     | 5572             | 5572             |

**Table S4 Concentration of Human Milk Oligosaccharides in Term or Preterm Milk At Specified Postmenstrual Age Separated By Milk Group**

\* When there are results below the method limit of quantification (LoQ) the result has been assigned value of  $0.5 \times \text{LoQ}$ , hence the minimum value appears to be the same in many cases. When a large number of datapoints are below LoQ this can also have the effect that the median = minimum.

| HMO  | Milk Group | Study Arm | Postmenstrual Age (weeks) | N  | HMO Concentration (mg/L) |       |       |        |          |                  |                  |
|------|------------|-----------|---------------------------|----|--------------------------|-------|-------|--------|----------|------------------|------------------|
|      |            |           |                           |    | min *                    | max   | mean  | sd     | median * | Quartile 1 (25%) | Quartile 3 (75%) |
| 2'FL | G3         | TERM      | 43                        | 1  | 4390                     | 4390  | 4390  | NA     | 4390     | 4390             | 4390             |
| 2'FL | G3         | TERM      | 44                        | 1  | 4556                     | 4556  | 4556  | NA     | 4556     | 4556             | 4556             |
| 2'FL | G3         | TERM      | 45                        | 1  | 4090                     | 4090  | 4090  | NA     | 4090     | 4090             | 4090             |
| 2'FL | G3         | TERM      | 46                        | 1  | 3666                     | 3666  | 3666  | NA     | 3666     | 3666             | 3666             |
| 2'FL | G3         | TERM      | 47                        | 1  | 3530                     | 3530  | 3530  | NA     | 3530     | 3530             | 3530             |
| 2'FL | G3         | TERM      | 48                        | 1  | 4133                     | 4133  | 4133  | NA     | 4133     | 4133             | 4133             |
| 2'FL | G4         | TERM      | 40                        | 1  | 26.81                    | 26.81 | 26.81 | NA     | 26.81    | 26.81            | 26.81            |
| 2'FL | G4         | TERM      | 41                        | 1  | 16.16                    | 16.16 | 16.16 | NA     | 16.16    | 16.16            | 16.16            |
| 2'FL | G4         | TERM      | 42                        | 1  | 6.500                    | 6.500 | 6.500 | NA     | 6.500    | 6.500            | 6.500            |
| 2'FL | G4         | TERM      | 43                        | 1  | 6.500                    | 6.500 | 6.500 | NA     | 6.500    | 6.500            | 6.500            |
| 2'FL | G4         | TERM      | 44                        | 1  | 6.500                    | 6.500 | 6.500 | NA     | 6.500    | 6.500            | 6.500            |
| 2'FL | G4         | TERM      | 45                        | 1  | 6.500                    | 6.500 | 6.500 | NA     | 6.500    | 6.500            | 6.500            |
| 2'FL | G4         | TERM      | 46                        | 1  | 6.500                    | 6.500 | 6.500 | NA     | 6.500    | 6.500            | 6.500            |
| 2'FL | G4         | TERM      | 47                        | 1  | 6.500                    | 6.500 | 6.500 | NA     | 6.500    | 6.500            | 6.500            |
| 3'GL | G1         | PRE-TERM  | 30                        | 7  | 4.000                    | 10.44 | 6.177 | 2.804  | 4.000    | 4.000            | 8.401            |
| 3'GL | G1         | PRE-TERM  | 31                        | 9  | 4.000                    | 14.88 | 5.722 | 3.758  | 4.000    | 4.000            | 4.000            |
| 3'GL | G1         | PRE-TERM  | 32                        | 13 | 4.000                    | 28.16 | 8.027 | 6.917  | 4.000    | 4.000            | 10.38            |
| 3'GL | G1         | PRE-TERM  | 33                        | 18 | 4.000                    | 28.82 | 7.853 | 7.644  | 4.000    | 4.000            | 7.820            |
| 3'GL | G1         | PRE-TERM  | 34                        | 19 | 4.000                    | 30.06 | 7.747 | 7.610  | 4.000    | 4.000            | 6.872            |
| 3'GL | G1         | PRE-TERM  | 35                        | 18 | 4.000                    | 21.56 | 6.275 | 4.948  | 4.000    | 4.000            | 4.000            |
| 3'GL | G1         | PRE-TERM  | 36                        | 19 | 4.000                    | 10.04 | 4.808 | 1.948  | 4.000    | 4.000            | 4.000            |
| 3'GL | G1         | PRE-TERM  | 37                        | 18 | 4.000                    | 11.85 | 4.975 | 2.322  | 4.000    | 4.000            | 4.000            |
| 3'GL | G1         | PRE-TERM  | 38                        | 11 | 4.000                    | 70.00 | 13.51 | 19.64  | 4.000    | 4.000            | 11.84            |
| 3'GL | G1         | PRE-TERM  | 39                        | 16 | 4.000                    | 23.04 | 6.686 | 5.546  | 4.000    | 4.000            | 5.030            |
| 3'GL | G1         | PRE-TERM  | 40                        | 7  | 4.000                    | 21.24 | 10.85 | 7.181  | 11.12    | 4.000            | 15.78            |
| 3'GL | G1         | PRE-TERM  | 41                        | 12 | 4.000                    | 15.76 | 6.675 | 4.865  | 4.000    | 4.000            | 6.359            |
| 3'GL | G1         | PRE-TERM  | 42                        | 6  | 4.000                    | 21.49 | 9.513 | 7.063  | 7.152    | 4.000            | 12.54            |
| 3'GL | G1         | PRE-TERM  | 43                        | 10 | 4.000                    | 15.01 | 5.814 | 3.932  | 4.000    | 4.000            | 4.000            |
| 3'GL | G1         | PRE-TERM  | 44                        | 5  | 4.000                    | 10.64 | 6.305 | 3.216  | 4.000    | 4.000            | 8.889            |
| 3'GL | G1         | PRE-TERM  | 45                        | 9  | 4.000                    | 8.221 | 4.469 | 1.407  | 4.000    | 4.000            | 4.000            |
| 3'GL | G1         | PRE-TERM  | 46                        | 6  | 4.000                    | 15.21 | 7.703 | 4.570  | 6.523    | 4.000            | 9.728            |
| 3'GL | G1         | PRE-TERM  | 47                        | 3  | 4.000                    | 4.000 | 4.000 | 0.0000 | 4.000    | 4.000            | 4.000            |
| 3'GL | G1         | PRE-TERM  | 48                        | 4  | 4.000                    | 12.84 | 6.211 | 4.422  | 4.000    | 4.000            | 6.211            |
| 3'GL | G1         | TERM      | 38                        | 2  | 8.823                    | 9.726 | 9.274 | 0.6384 | 9.274    | 9.049            | 9.500            |
| 3'GL | G1         | TERM      | 39                        | 9  | 4.000                    | 19.87 | 10.29 | 6.037  | 9.017    | 4.000            | 16.04            |
| 3'GL | G1         | TERM      | 40                        | 13 | 4.000                    | 20.76 | 10.12 | 5.773  | 11.16    | 4.000            | 13.96            |

**Table S4 Concentration of Human Milk Oligosaccharides in Term or Preterm Milk At Specified Postmenstrual Age Separated By Milk Group**

\* When there are results below the method limit of quantification (LoQ) the result has been assigned value of  $0.5 \times \text{LoQ}$ , hence the minimum value appears to be the same in many cases. When a large number of datapoints are below LoQ this can also have the effect that the median = minimum.

| HMO  | Milk Group | Study Arm | Postmenstrual Age (weeks) | N  | HMO Concentration (mg/L) |       |       |        |          |                  |                  |
|------|------------|-----------|---------------------------|----|--------------------------|-------|-------|--------|----------|------------------|------------------|
|      |            |           |                           |    | min *                    | max   | mean  | sd     | median * | Quartile 1 (25%) | Quartile 3 (75%) |
| 3'GL | G1         | TERM      | 41                        | 21 | 4.000                    | 19.07 | 8.251 | 4.602  | 8.173    | 4.000            | 11.70            |
| 3'GL | G1         | TERM      | 42                        | 21 | 4.000                    | 17.67 | 5.629 | 3.488  | 4.000    | 4.000            | 4.000            |
| 3'GL | G1         | TERM      | 43                        | 21 | 4.000                    | 16.81 | 6.408 | 3.811  | 4.000    | 4.000            | 9.229            |
| 3'GL | G1         | TERM      | 44                        | 20 | 4.000                    | 18.94 | 6.530 | 4.803  | 4.000    | 4.000            | 5.443            |
| 3'GL | G1         | TERM      | 45                        | 21 | 4.000                    | 33.42 | 5.916 | 6.729  | 4.000    | 4.000            | 4.000            |
| 3'GL | G1         | TERM      | 46                        | 17 | 4.000                    | 10.07 | 4.654 | 1.854  | 4.000    | 4.000            | 4.000            |
| 3'GL | G1         | TERM      | 47                        | 12 | 4.000                    | 16.11 | 5.386 | 3.619  | 4.000    | 4.000            | 4.000            |
| 3'GL | G1         | TERM      | 48                        | 6  | 4.000                    | 20.73 | 6.789 | 6.832  | 4.000    | 4.000            | 4.000            |
| 3'GL | G2         | PRE-TERM  | 29                        | 1  | 11.32                    | 11.32 | 11.32 | NA     | 11.32    | 11.32            | 11.32            |
| 3'GL | G2         | PRE-TERM  | 30                        | 2  | 4.000                    | 8.204 | 6.102 | 2.973  | 6.102    | 5.051            | 7.153            |
| 3'GL | G2         | PRE-TERM  | 31                        | 2  | 4.000                    | 9.894 | 6.947 | 4.167  | 6.947    | 5.473            | 8.420            |
| 3'GL | G2         | PRE-TERM  | 32                        | 3  | 4.000                    | 12.56 | 6.853 | 4.942  | 4.000    | 4.000            | 8.279            |
| 3'GL | G2         | PRE-TERM  | 33                        | 5  | 4.000                    | 21.02 | 10.20 | 8.556  | 4.000    | 4.000            | 17.98            |
| 3'GL | G2         | PRE-TERM  | 34                        | 5  | 4.000                    | 11.13 | 6.606 | 3.595  | 4.000    | 4.000            | 9.895            |
| 3'GL | G2         | PRE-TERM  | 35                        | 5  | 4.000                    | 4.000 | 4.000 | 0.0000 | 4.000    | 4.000            | 4.000            |
| 3'GL | G2         | PRE-TERM  | 36                        | 5  | 4.000                    | 8.011 | 4.802 | 1.794  | 4.000    | 4.000            | 4.000            |
| 3'GL | G2         | PRE-TERM  | 37                        | 4  | 4.000                    | 16.72 | 8.459 | 6.012  | 6.559    | 4.000            | 11.02            |
| 3'GL | G2         | PRE-TERM  | 38                        | 4  | 4.000                    | 12.18 | 6.046 | 4.092  | 4.000    | 4.000            | 6.046            |
| 3'GL | G2         | PRE-TERM  | 39                        | 3  | 4.000                    | 4.000 | 4.000 | 0.0000 | 4.000    | 4.000            | 4.000            |
| 3'GL | G2         | PRE-TERM  | 40                        | 3  | 4.000                    | 4.000 | 4.000 | 0.0000 | 4.000    | 4.000            | 4.000            |
| 3'GL | G2         | PRE-TERM  | 41                        | 2  | 4.000                    | 4.000 | 4.000 | 0.0000 | 4.000    | 4.000            | 4.000            |
| 3'GL | G2         | PRE-TERM  | 42                        | 3  | 4.000                    | 11.78 | 6.593 | 4.492  | 4.000    | 4.000            | 7.890            |
| 3'GL | G2         | PRE-TERM  | 43                        | 2  | 4.000                    | 4.000 | 4.000 | 0.0000 | 4.000    | 4.000            | 4.000            |
| 3'GL | G2         | PRE-TERM  | 44                        | 3  | 4.000                    | 4.000 | 4.000 | 0.0000 | 4.000    | 4.000            | 4.000            |
| 3'GL | G2         | PRE-TERM  | 45                        | 2  | 4.000                    | 10.27 | 7.133 | 4.431  | 7.133    | 5.567            | 8.700            |
| 3'GL | G2         | PRE-TERM  | 46                        | 2  | 4.000                    | 12.65 | 8.325 | 6.117  | 8.325    | 6.163            | 10.49            |
| 3'GL | G2         | PRE-TERM  | 48                        | 1  | 4.000                    | 4.000 | 4.000 | NA     | 4.000    | 4.000            | 4.000            |
| 3'GL | G2         | TERM      | 39                        | 1  | 14.96                    | 14.96 | 14.96 | NA     | 14.96    | 14.96            | 14.96            |
| 3'GL | G2         | TERM      | 40                        | 5  | 4.000                    | 21.33 | 13.37 | 7.088  | 12.76    | 9.509            | 19.25            |
| 3'GL | G2         | TERM      | 41                        | 4  | 4.000                    | 10.91 | 5.728 | 3.456  | 4.000    | 4.000            | 5.728            |
| 3'GL | G2         | TERM      | 42                        | 6  | 4.000                    | 8.782 | 4.797 | 1.952  | 4.000    | 4.000            | 4.000            |
| 3'GL | G2         | TERM      | 43                        | 5  | 4.000                    | 4.000 | 4.000 | 0.0000 | 4.000    | 4.000            | 4.000            |
| 3'GL | G2         | TERM      | 44                        | 5  | 4.000                    | 4.000 | 4.000 | 0.0000 | 4.000    | 4.000            | 4.000            |
| 3'GL | G2         | TERM      | 45                        | 5  | 4.000                    | 4.000 | 4.000 | 0.0000 | 4.000    | 4.000            | 4.000            |
| 3'GL | G2         | TERM      | 46                        | 5  | 4.000                    | 4.000 | 4.000 | 0.0000 | 4.000    | 4.000            | 4.000            |
| 3'GL | G2         | TERM      | 47                        | 4  | 4.000                    | 4.000 | 4.000 | 0.0000 | 4.000    | 4.000            | 4.000            |

**Table S4 Concentration of Human Milk Oligosaccharides in Term or Preterm Milk At Specified Postmenstrual Age Separated By Milk Group**

\* When there are results below the method limit of quantification (LoQ) the result has been assigned value of  $0.5 \times \text{LoQ}$ , hence the minimum value appears to be the same in many cases. When a large number of datapoints are below LoQ this can also have the effect that the median = minimum.

| HMO  | Milk Group | Study Arm | Postmenstrual Age (weeks) | N  | HMO Concentration (mg/L) |       |       |       |          |                  |                  |
|------|------------|-----------|---------------------------|----|--------------------------|-------|-------|-------|----------|------------------|------------------|
|      |            |           |                           |    | min *                    | max   | mean  | sd    | median * | Quartile 1 (25%) | Quartile 3 (75%) |
| 3'GL | G3         | PRE-TERM  | 30                        | 1  | 4.000                    | 4.000 | 4.000 | NA    | 4.000    | 4.000            | 4.000            |
| 3'GL | G3         | PRE-TERM  | 31                        | 1  | 4.000                    | 4.000 | 4.000 | NA    | 4.000    | 4.000            | 4.000            |
| 3'GL | G3         | PRE-TERM  | 32                        | 1  | 4.000                    | 4.000 | 4.000 | NA    | 4.000    | 4.000            | 4.000            |
| 3'GL | G3         | PRE-TERM  | 33                        | 1  | 4.000                    | 4.000 | 4.000 | NA    | 4.000    | 4.000            | 4.000            |
| 3'GL | G3         | PRE-TERM  | 34                        | 1  | 4.000                    | 4.000 | 4.000 | NA    | 4.000    | 4.000            | 4.000            |
| 3'GL | G3         | PRE-TERM  | 35                        | 1  | 4.000                    | 4.000 | 4.000 | NA    | 4.000    | 4.000            | 4.000            |
| 3'GL | G3         | PRE-TERM  | 36                        | 1  | 4.000                    | 4.000 | 4.000 | NA    | 4.000    | 4.000            | 4.000            |
| 3'GL | G3         | PRE-TERM  | 37                        | 1  | 4.000                    | 4.000 | 4.000 | NA    | 4.000    | 4.000            | 4.000            |
| 3'GL | G3         | PRE-TERM  | 39                        | 1  | 4.000                    | 4.000 | 4.000 | NA    | 4.000    | 4.000            | 4.000            |
| 3'GL | G3         | PRE-TERM  | 41                        | 1  | 4.000                    | 4.000 | 4.000 | NA    | 4.000    | 4.000            | 4.000            |
| 3'GL | G3         | PRE-TERM  | 43                        | 1  | 4.000                    | 4.000 | 4.000 | NA    | 4.000    | 4.000            | 4.000            |
| 3'GL | G3         | PRE-TERM  | 45                        | 1  | 4.000                    | 4.000 | 4.000 | NA    | 4.000    | 4.000            | 4.000            |
| 3'GL | G3         | TERM      | 41                        | 1  | 8.864                    | 8.864 | 8.864 | NA    | 8.864    | 8.864            | 8.864            |
| 3'GL | G3         | TERM      | 42                        | 1  | 4.000                    | 4.000 | 4.000 | NA    | 4.000    | 4.000            | 4.000            |
| 3'GL | G3         | TERM      | 43                        | 1  | 4.000                    | 4.000 | 4.000 | NA    | 4.000    | 4.000            | 4.000            |
| 3'GL | G3         | TERM      | 44                        | 1  | 4.000                    | 4.000 | 4.000 | NA    | 4.000    | 4.000            | 4.000            |
| 3'GL | G3         | TERM      | 45                        | 1  | 4.000                    | 4.000 | 4.000 | NA    | 4.000    | 4.000            | 4.000            |
| 3'GL | G3         | TERM      | 46                        | 1  | 4.000                    | 4.000 | 4.000 | NA    | 4.000    | 4.000            | 4.000            |
| 3'GL | G3         | TERM      | 47                        | 1  | 4.000                    | 4.000 | 4.000 | NA    | 4.000    | 4.000            | 4.000            |
| 3'GL | G3         | TERM      | 48                        | 1  | 4.000                    | 4.000 | 4.000 | NA    | 4.000    | 4.000            | 4.000            |
| 3'GL | G4         | TERM      | 40                        | 1  | 32.97                    | 32.97 | 32.97 | NA    | 32.97    | 32.97            | 32.97            |
| 3'GL | G4         | TERM      | 41                        | 1  | 19.72                    | 19.72 | 19.72 | NA    | 19.72    | 19.72            | 19.72            |
| 3'GL | G4         | TERM      | 42                        | 1  | 10.00                    | 10.00 | 10.00 | NA    | 10.00    | 10.00            | 10.00            |
| 3'GL | G4         | TERM      | 43                        | 1  | 8.499                    | 8.499 | 8.499 | NA    | 8.499    | 8.499            | 8.499            |
| 3'GL | G4         | TERM      | 44                        | 1  | 4.000                    | 4.000 | 4.000 | NA    | 4.000    | 4.000            | 4.000            |
| 3'GL | G4         | TERM      | 45                        | 1  | 8.446                    | 8.446 | 8.446 | NA    | 8.446    | 8.446            | 8.446            |
| 3'GL | G4         | TERM      | 46                        | 1  | 4.000                    | 4.000 | 4.000 | NA    | 4.000    | 4.000            | 4.000            |
| 3'GL | G4         | TERM      | 47                        | 1  | 4.000                    | 4.000 | 4.000 | NA    | 4.000    | 4.000            | 4.000            |
| 3'SL | G1         | PRE-TERM  | 30                        | 7  | 175.9                    | 365.6 | 236.7 | 62.41 | 224.6    | 203.6            | 241.7            |
| 3'SL | G1         | PRE-TERM  | 31                        | 9  | 126.6                    | 329.8 | 220.9 | 54.89 | 220.0    | 198.8            | 241.0            |
| 3'SL | G1         | PRE-TERM  | 32                        | 13 | 107.7                    | 260.5 | 201.7 | 47.75 | 202.4    | 184.5            | 241.6            |
| 3'SL | G1         | PRE-TERM  | 33                        | 18 | 113.1                    | 513.3 | 198.7 | 92.80 | 178.5    | 132.0            | 222.8            |
| 3'SL | G1         | PRE-TERM  | 34                        | 19 | 107.6                    | 439.9 | 199.3 | 82.89 | 169.5    | 150.4            | 236.1            |
| 3'SL | G1         | PRE-TERM  | 35                        | 18 | 98.75                    | 430.3 | 194.3 | 85.34 | 171.8    | 160.5            | 198.4            |
| 3'SL | G1         | PRE-TERM  | 36                        | 19 | 103.5                    | 286.8 | 173.7 | 48.94 | 177.0    | 144.6            | 199.0            |
| 3'SL | G1         | PRE-TERM  | 37                        | 18 | 85.96                    | 303.5 | 176.5 | 55.56 | 173.5    | 156.3            | 212.2            |

**Table S4 Concentration of Human Milk Oligosaccharides in Term or Preterm Milk At Specified Postmenstrual Age Separated By Milk Group**

\* When there are results below the method limit of quantification (LoQ) the result has been assigned value of  $0.5 \times \text{LoQ}$ , hence the minimum value appears to be the same in many cases. When a large number of datapoints are below LoQ this can also have the effect that the median = minimum.

| HMO  | Milk Group | Study Arm | Postmenstrual Age (weeks) | N  | HMO Concentration (mg/L) |       |       |       |          |                  |                  |
|------|------------|-----------|---------------------------|----|--------------------------|-------|-------|-------|----------|------------------|------------------|
|      |            |           |                           |    | min *                    | max   | mean  | sd    | median * | Quartile 1 (25%) | Quartile 3 (75%) |
| 3'SL | G1         | PRE-TERM  | 38                        | 11 | 91.34                    | 438.1 | 202.3 | 100.6 | 219.4    | 124.3            | 239.1            |
| 3'SL | G1         | PRE-TERM  | 39                        | 16 | 91.08                    | 329.8 | 178.1 | 66.15 | 160.6    | 141.1            | 215.8            |
| 3'SL | G1         | PRE-TERM  | 40                        | 7  | 99.72                    | 333.8 | 199.1 | 86.22 | 185.0    | 136.0            | 251.4            |
| 3'SL | G1         | PRE-TERM  | 41                        | 12 | 99.07                    | 393.0 | 223.2 | 96.61 | 176.6    | 167.4            | 298.0            |
| 3'SL | G1         | PRE-TERM  | 42                        | 6  | 88.38                    | 274.9 | 163.2 | 73.26 | 149.4    | 107.2            | 205.2            |
| 3'SL | G1         | PRE-TERM  | 43                        | 10 | 109.4                    | 403.2 | 212.1 | 94.91 | 170.5    | 143.2            | 281.0            |
| 3'SL | G1         | PRE-TERM  | 44                        | 5  | 108.2                    | 248.9 | 168.2 | 62.71 | 143.1    | 120.4            | 220.2            |
| 3'SL | G1         | PRE-TERM  | 45                        | 9  | 119.6                    | 325.0 | 192.4 | 67.26 | 165.2    | 155.6            | 224.8            |
| 3'SL | G1         | PRE-TERM  | 46                        | 6  | 82.71                    | 282.3 | 165.7 | 84.03 | 141.1    | 100.8            | 230.2            |
| 3'SL | G1         | PRE-TERM  | 47                        | 3  | 116.2                    | 264.4 | 184.9 | 74.69 | 174.1    | 145.1            | 219.3            |
| 3'SL | G1         | PRE-TERM  | 48                        | 4  | 100.5                    | 319.4 | 167.9 | 101.8 | 125.8    | 116.1            | 177.5            |
| 3'SL | G1         | TERM      | 38                        | 2  | 181.9                    | 351.2 | 266.5 | 119.7 | 266.5    | 224.2            | 308.9            |
| 3'SL | G1         | TERM      | 39                        | 9  | 119.6                    | 287.2 | 219.1 | 66.99 | 230.8    | 146.2            | 279.2            |
| 3'SL | G1         | TERM      | 40                        | 13 | 94.16                    | 354.4 | 177.4 | 76.04 | 140.2    | 134.9            | 186.1            |
| 3'SL | G1         | TERM      | 41                        | 21 | 78.49                    | 270.7 | 152.3 | 48.41 | 139.2    | 122.9            | 175.6            |
| 3'SL | G1         | TERM      | 42                        | 21 | 86.80                    | 280.3 | 138.5 | 43.46 | 134.0    | 105.6            | 163.4            |
| 3'SL | G1         | TERM      | 43                        | 21 | 77.94                    | 282.3 | 135.3 | 45.14 | 121.8    | 106.4            | 156.4            |
| 3'SL | G1         | TERM      | 44                        | 20 | 72.18                    | 272.4 | 130.7 | 47.71 | 128.6    | 91.36            | 151.7            |
| 3'SL | G1         | TERM      | 45                        | 21 | 74.58                    | 274.9 | 132.6 | 44.95 | 124.1    | 105.7            | 151.9            |
| 3'SL | G1         | TERM      | 46                        | 17 | 82.35                    | 303.0 | 132.9 | 51.17 | 114.4    | 104.8            | 145.2            |
| 3'SL | G1         | TERM      | 47                        | 12 | 50.25                    | 240.1 | 130.9 | 53.79 | 141.0    | 87.70            | 163.0            |
| 3'SL | G1         | TERM      | 48                        | 6  | 94.50                    | 236.8 | 145.1 | 52.53 | 142.1    | 105.0            | 157.2            |
| 3'SL | G2         | PRE-TERM  | 29                        | 1  | 419.1                    | 419.1 | 419.1 | NA    | 419.1    | 419.1            | 419.1            |
| 3'SL | G2         | PRE-TERM  | 30                        | 2  | 215.7                    | 257.5 | 236.6 | 29.53 | 236.6    | 226.2            | 247.1            |
| 3'SL | G2         | PRE-TERM  | 31                        | 2  | 185.3                    | 196.6 | 190.9 | 7.999 | 190.9    | 188.1            | 193.8            |
| 3'SL | G2         | PRE-TERM  | 32                        | 3  | 131.1                    | 272.6 | 209.0 | 71.83 | 223.3    | 177.2            | 247.9            |
| 3'SL | G2         | PRE-TERM  | 33                        | 5  | 132.6                    | 284.0 | 235.5 | 60.83 | 254.5    | 232.2            | 274.1            |
| 3'SL | G2         | PRE-TERM  | 34                        | 5  | 120.4                    | 311.3 | 202.4 | 72.62 | 191.1    | 161.1            | 228.2            |
| 3'SL | G2         | PRE-TERM  | 35                        | 5  | 119.6                    | 240.4 | 182.2 | 49.47 | 178.0    | 151.7            | 221.3            |
| 3'SL | G2         | PRE-TERM  | 36                        | 5  | 105.8                    | 362.9 | 198.3 | 103.0 | 164.7    | 129.5            | 228.3            |
| 3'SL | G2         | PRE-TERM  | 37                        | 4  | 129.1                    | 342.8 | 198.0 | 97.72 | 160.1    | 148.0            | 210.2            |
| 3'SL | G2         | PRE-TERM  | 38                        | 4  | 97.27                    | 202.4 | 137.7 | 45.88 | 125.5    | 111.0            | 152.2            |
| 3'SL | G2         | PRE-TERM  | 39                        | 3  | 92.00                    | 186.3 | 133.6 | 48.14 | 122.5    | 107.2            | 154.4            |
| 3'SL | G2         | PRE-TERM  | 40                        | 3  | 92.61                    | 143.9 | 118.6 | 25.65 | 119.4    | 106.0            | 131.7            |
| 3'SL | G2         | PRE-TERM  | 41                        | 2  | 126.1                    | 212.0 | 169.1 | 60.80 | 169.1    | 147.6            | 190.6            |
| 3'SL | G2         | PRE-TERM  | 42                        | 3  | 83.76                    | 162.9 | 119.7 | 40.07 | 112.4    | 98.11            | 137.7            |

**Table S4 Concentration of Human Milk Oligosaccharides in Term or Preterm Milk At Specified Postmenstrual Age Separated By Milk Group**

\* When there are results below the method limit of quantification (LoQ) the result has been assigned value of  $0.5 \times \text{LoQ}$ , hence the minimum value appears to be the same in many cases. When a large number of datapoints are below LoQ this can also have the effect that the median = minimum.

| HMO  | Milk Group | Study Arm | Postmenstrual Age (weeks) | N | HMO Concentration (mg/L) |       |       |       |          |                  |                  |
|------|------------|-----------|---------------------------|---|--------------------------|-------|-------|-------|----------|------------------|------------------|
|      |            |           |                           |   | min *                    | max   | mean  | sd    | median * | Quartile 1 (25%) | Quartile 3 (75%) |
| 3'SL | G2         | PRE-TERM  | 43                        | 2 | 132.8                    | 239.2 | 186.0 | 75.23 | 186.0    | 159.4            | 212.6            |
| 3'SL | G2         | PRE-TERM  | 44                        | 3 | 86.41                    | 146.4 | 113.7 | 30.35 | 108.4    | 97.39            | 127.4            |
| 3'SL | G2         | PRE-TERM  | 45                        | 2 | 86.95                    | 179.1 | 133.0 | 65.20 | 133.0    | 110.0            | 156.1            |
| 3'SL | G2         | PRE-TERM  | 46                        | 2 | 146.0                    | 162.4 | 154.2 | 11.56 | 154.2    | 150.1            | 158.3            |
| 3'SL | G2         | PRE-TERM  | 48                        | 1 | 145.9                    | 145.9 | 145.9 | NA    | 145.9    | 145.9            | 145.9            |
| 3'SL | G2         | TERM      | 39                        | 1 | 162.7                    | 162.7 | 162.7 | NA    | 162.7    | 162.7            | 162.7            |
| 3'SL | G2         | TERM      | 40                        | 5 | 100.4                    | 380.6 | 202.6 | 114.4 | 197.0    | 105.2            | 229.6            |
| 3'SL | G2         | TERM      | 41                        | 4 | 89.66                    | 160.1 | 117.7 | 32.28 | 110.5    | 94.20            | 134.0            |
| 3'SL | G2         | TERM      | 42                        | 6 | 94.04                    | 136.4 | 118.6 | 18.31 | 122.6    | 104.1            | 134.0            |
| 3'SL | G2         | TERM      | 43                        | 5 | 92.27                    | 136.6 | 114.8 | 20.12 | 116.6    | 96.47            | 132.1            |
| 3'SL | G2         | TERM      | 44                        | 5 | 93.14                    | 140.4 | 112.9 | 19.55 | 103.5    | 101.7            | 126.0            |
| 3'SL | G2         | TERM      | 45                        | 5 | 35.33                    | 163.0 | 106.3 | 48.44 | 111.0    | 87.95            | 134.1            |
| 3'SL | G2         | TERM      | 46                        | 5 | 74.78                    | 122.0 | 99.10 | 18.01 | 102.7    | 88.86            | 107.1            |
| 3'SL | G2         | TERM      | 47                        | 4 | 77.15                    | 131.7 | 107.1 | 24.72 | 109.9    | 92.26            | 124.8            |
| 3'SL | G3         | PRE-TERM  | 30                        | 1 | 174.7                    | 174.7 | 174.7 | NA    | 174.7    | 174.7            | 174.7            |
| 3'SL | G3         | PRE-TERM  | 31                        | 1 | 218.9                    | 218.9 | 218.9 | NA    | 218.9    | 218.9            | 218.9            |
| 3'SL | G3         | PRE-TERM  | 32                        | 1 | 209.5                    | 209.5 | 209.5 | NA    | 209.5    | 209.5            | 209.5            |
| 3'SL | G3         | PRE-TERM  | 33                        | 1 | 155.9                    | 155.9 | 155.9 | NA    | 155.9    | 155.9            | 155.9            |
| 3'SL | G3         | PRE-TERM  | 34                        | 1 | 177.6                    | 177.6 | 177.6 | NA    | 177.6    | 177.6            | 177.6            |
| 3'SL | G3         | PRE-TERM  | 35                        | 1 | 176.5                    | 176.5 | 176.5 | NA    | 176.5    | 176.5            | 176.5            |
| 3'SL | G3         | PRE-TERM  | 36                        | 1 | 124.4                    | 124.4 | 124.4 | NA    | 124.4    | 124.4            | 124.4            |
| 3'SL | G3         | PRE-TERM  | 37                        | 1 | 132.0                    | 132.0 | 132.0 | NA    | 132.0    | 132.0            | 132.0            |
| 3'SL | G3         | PRE-TERM  | 39                        | 1 | 117.7                    | 117.7 | 117.7 | NA    | 117.7    | 117.7            | 117.7            |
| 3'SL | G3         | PRE-TERM  | 41                        | 1 | 123.5                    | 123.5 | 123.5 | NA    | 123.5    | 123.5            | 123.5            |
| 3'SL | G3         | PRE-TERM  | 43                        | 1 | 128.8                    | 128.8 | 128.8 | NA    | 128.8    | 128.8            | 128.8            |
| 3'SL | G3         | PRE-TERM  | 45                        | 1 | 131.0                    | 131.0 | 131.0 | NA    | 131.0    | 131.0            | 131.0            |
| 3'SL | G3         | TERM      | 41                        | 1 | 154.8                    | 154.8 | 154.8 | NA    | 154.8    | 154.8            | 154.8            |
| 3'SL | G3         | TERM      | 42                        | 1 | 152.1                    | 152.1 | 152.1 | NA    | 152.1    | 152.1            | 152.1            |
| 3'SL | G3         | TERM      | 43                        | 1 | 149.3                    | 149.3 | 149.3 | NA    | 149.3    | 149.3            | 149.3            |
| 3'SL | G3         | TERM      | 44                        | 1 | 153.6                    | 153.6 | 153.6 | NA    | 153.6    | 153.6            | 153.6            |
| 3'SL | G3         | TERM      | 45                        | 1 | 140.2                    | 140.2 | 140.2 | NA    | 140.2    | 140.2            | 140.2            |
| 3'SL | G3         | TERM      | 46                        | 1 | 135.1                    | 135.1 | 135.1 | NA    | 135.1    | 135.1            | 135.1            |
| 3'SL | G3         | TERM      | 47                        | 1 | 138.1                    | 138.1 | 138.1 | NA    | 138.1    | 138.1            | 138.1            |
| 3'SL | G3         | TERM      | 48                        | 1 | 140.2                    | 140.2 | 140.2 | NA    | 140.2    | 140.2            | 140.2            |
| 3'SL | G4         | TERM      | 40                        | 1 | 241.3                    | 241.3 | 241.3 | NA    | 241.3    | 241.3            | 241.3            |
| 3'SL | G4         | TERM      | 41                        | 1 | 206.5                    | 206.5 | 206.5 | NA    | 206.5    | 206.5            | 206.5            |

**Table S4 Concentration of Human Milk Oligosaccharides in Term or Preterm Milk At Specified Postmenstrual Age Separated By Milk Group**

\* When there are results below the method limit of quantification (LoQ) the result has been assigned value of  $0.5 \times \text{LoQ}$ , hence the minimum value appears to be the same in many cases. When a large number of datapoints are below LoQ this can also have the effect that the median = minimum.

| HMO  | Milk Group | Study Arm | Postmenstrual Age (weeks) | N  | HMO Concentration (mg/L) |       |       |       |          |                  |                  |
|------|------------|-----------|---------------------------|----|--------------------------|-------|-------|-------|----------|------------------|------------------|
|      |            |           |                           |    | min *                    | max   | mean  | sd    | median * | Quartile 1 (25%) | Quartile 3 (75%) |
| 3'SL | G4         | TERM      | 42                        | 1  | 162.2                    | 162.2 | 162.2 | NA    | 162.2    | 162.2            | 162.2            |
| 3'SL | G4         | TERM      | 43                        | 1  | 155.5                    | 155.5 | 155.5 | NA    | 155.5    | 155.5            | 155.5            |
| 3'SL | G4         | TERM      | 44                        | 1  | 140.1                    | 140.1 | 140.1 | NA    | 140.1    | 140.1            | 140.1            |
| 3'SL | G4         | TERM      | 45                        | 1  | 152.2                    | 152.2 | 152.2 | NA    | 152.2    | 152.2            | 152.2            |
| 3'SL | G4         | TERM      | 46                        | 1  | 119.8                    | 119.8 | 119.8 | NA    | 119.8    | 119.8            | 119.8            |
| 3'SL | G4         | TERM      | 47                        | 1  | 111.7                    | 111.7 | 111.7 | NA    | 111.7    | 111.7            | 111.7            |
| 3FL  | G1         | PRE-TERM  | 30                        | 7  | 183.6                    | 844.2 | 358.7 | 236.7 | 239.7    | 210.5            | 411.2            |
| 3FL  | G1         | PRE-TERM  | 31                        | 9  | 181.4                    | 978.0 | 368.0 | 256.5 | 259.0    | 213.0            | 381.1            |
| 3FL  | G1         | PRE-TERM  | 32                        | 13 | 112.2                    | 1087  | 362.5 | 259.7 | 271.8    | 186.2            | 395.4            |
| 3FL  | G1         | PRE-TERM  | 33                        | 18 | 154.5                    | 1262  | 384.6 | 248.9 | 321.4    | 260.7            | 420.9            |
| 3FL  | G1         | PRE-TERM  | 34                        | 19 | 179.6                    | 1264  | 436.0 | 250.1 | 394.1    | 274.0            | 507.2            |
| 3FL  | G1         | PRE-TERM  | 35                        | 18 | 205.2                    | 1201  | 495.3 | 214.4 | 473.7    | 433.2            | 530.2            |
| 3FL  | G1         | PRE-TERM  | 36                        | 19 | 228.4                    | 1242  | 515.2 | 229.1 | 495.4    | 385.8            | 576.9            |
| 3FL  | G1         | PRE-TERM  | 37                        | 18 | 266.2                    | 1356  | 604.9 | 269.4 | 530.1    | 423.4            | 654.3            |
| 3FL  | G1         | PRE-TERM  | 38                        | 11 | 75.94                    | 1080  | 630.6 | 292.9 | 661.1    | 535.2            | 761.0            |
| 3FL  | G1         | PRE-TERM  | 39                        | 16 | 270.0                    | 1550  | 679.7 | 294.1 | 655.5    | 525.3            | 793.0            |
| 3FL  | G1         | PRE-TERM  | 40                        | 7  | 487.8                    | 809.4 | 648.6 | 118.5 | 682.9    | 552.3            | 727.7            |
| 3FL  | G1         | PRE-TERM  | 41                        | 12 | 368.4                    | 1504  | 779.0 | 282.7 | 761.5    | 634.8            | 840.5            |
| 3FL  | G1         | PRE-TERM  | 42                        | 6  | 492.5                    | 931.8 | 723.1 | 189.0 | 734.7    | 568.3            | 882.6            |
| 3FL  | G1         | PRE-TERM  | 43                        | 10 | 446.0                    | 1914  | 840.4 | 418.2 | 762.5    | 610.7            | 858.4            |
| 3FL  | G1         | PRE-TERM  | 44                        | 5  | 546.0                    | 1253  | 864.7 | 285.3 | 772.2    | 696.4            | 1056             |
| 3FL  | G1         | PRE-TERM  | 45                        | 9  | 435.5                    | 2188  | 933.6 | 529.4 | 740.6    | 611.9            | 1091             |
| 3FL  | G1         | PRE-TERM  | 46                        | 6  | 486.6                    | 1250  | 941.9 | 318.2 | 1032     | 713.2            | 1191             |
| 3FL  | G1         | PRE-TERM  | 47                        | 3  | 745.8                    | 1094  | 927.1 | 174.7 | 941.1    | 843.5            | 1018             |
| 3FL  | G1         | PRE-TERM  | 48                        | 4  | 688.4                    | 1378  | 1053  | 286.6 | 1073     | 932.0            | 1194             |
| 3FL  | G1         | TERM      | 38                        | 2  | 260.1                    | 341.2 | 300.7 | 57.39 | 300.7    | 280.4            | 321.0            |
| 3FL  | G1         | TERM      | 39                        | 9  | 137.2                    | 447.8 | 263.1 | 128.8 | 184.1    | 173.2            | 412.7            |
| 3FL  | G1         | TERM      | 40                        | 13 | 145.3                    | 662.5 | 299.7 | 152.9 | 255.6    | 190.3            | 359.4            |
| 3FL  | G1         | TERM      | 41                        | 21 | 119.4                    | 706.0 | 294.4 | 161.4 | 253.7    | 178.3            | 388.9            |
| 3FL  | G1         | TERM      | 42                        | 21 | 159.7                    | 672.5 | 343.7 | 152.2 | 314.9    | 223.3            | 414.1            |
| 3FL  | G1         | TERM      | 43                        | 21 | 197.3                    | 921.0 | 436.9 | 204.6 | 392.4    | 271.5            | 465.1            |
| 3FL  | G1         | TERM      | 44                        | 20 | 213.6                    | 863.1 | 468.0 | 176.9 | 446.8    | 363.6            | 534.5            |
| 3FL  | G1         | TERM      | 45                        | 21 | 294.2                    | 1114  | 542.5 | 215.4 | 496.2    | 424.4            | 572.6            |
| 3FL  | G1         | TERM      | 46                        | 17 | 151.0                    | 1231  | 589.9 | 288.9 | 527.8    | 447.2            | 608.8            |
| 3FL  | G1         | TERM      | 47                        | 12 | 242.1                    | 1182  | 557.2 | 277.9 | 525.9    | 403.3            | 595.5            |
| 3FL  | G1         | TERM      | 48                        | 6  | 360.8                    | 721.9 | 521.5 | 153.6 | 490.8    | 399.1            | 644.9            |



**Table S4 Concentration of Human Milk Oligosaccharides in Term or Preterm Milk At Specified Postmenstrual Age Separated By Milk Group**

\* When there are results below the method limit of quantification (LoQ) the result has been assigned value of  $0.5 \times \text{LoQ}$ , hence the minimum value appears to be the same in many cases. When a large number of datapoints are below LoQ this can also have the effect that the median = minimum.

| HMO | Milk Group | Study Arm | Postmenstrual Age (weeks) | N | HMO Concentration (mg/L) |       |       |       |          |                  |                  |
|-----|------------|-----------|---------------------------|---|--------------------------|-------|-------|-------|----------|------------------|------------------|
|     |            |           |                           |   | min *                    | max   | mean  | sd    | median * | Quartile 1 (25%) | Quartile 3 (75%) |
| 3FL | G2         | PRE-TERM  | 29                        | 1 | 1472                     | 1472  | 1472  | NA    | 1472     | 1472             | 1472             |
| 3FL | G2         | PRE-TERM  | 30                        | 2 | 991.9                    | 1176  | 1084  | 130.2 | 1084     | 1038             | 1130             |
| 3FL | G2         | PRE-TERM  | 31                        | 2 | 1041                     | 1124  | 1083  | 59.20 | 1083     | 1062             | 1104             |
| 3FL | G2         | PRE-TERM  | 32                        | 3 | 836.1                    | 1137  | 1017  | 159.5 | 1078     | 957.1            | 1108             |
| 3FL | G2         | PRE-TERM  | 33                        | 5 | 856.8                    | 1457  | 1097  | 250.6 | 1019     | 908.2            | 1246             |
| 3FL | G2         | PRE-TERM  | 34                        | 5 | 841.4                    | 1549  | 1195  | 274.6 | 1165     | 1050             | 1367             |
| 3FL | G2         | PRE-TERM  | 35                        | 5 | 985.7                    | 1488  | 1231  | 214.7 | 1287     | 1034             | 1359             |
| 3FL | G2         | PRE-TERM  | 36                        | 5 | 667.5                    | 1787  | 1338  | 516.8 | 1649     | 894.6            | 1690             |
| 3FL | G2         | PRE-TERM  | 37                        | 4 | 829.2                    | 2465  | 1810  | 739.0 | 1974     | 1454             | 2330             |
| 3FL | G2         | PRE-TERM  | 38                        | 4 | 958.9                    | 1661  | 1224  | 333.1 | 1138     | 967.0            | 1396             |
| 3FL | G2         | PRE-TERM  | 39                        | 3 | 829.5                    | 1825  | 1280  | 504.6 | 1186     | 1008             | 1506             |
| 3FL | G2         | PRE-TERM  | 40                        | 3 | 956.4                    | 2231  | 1401  | 719.5 | 1015     | 985.5            | 1623             |
| 3FL | G2         | PRE-TERM  | 41                        | 2 | 2011                     | 2126  | 2069  | 81.13 | 2069     | 2040             | 2097             |
| 3FL | G2         | PRE-TERM  | 42                        | 3 | 1158                     | 2821  | 1724  | 950.0 | 1193     | 1175             | 2007             |
| 3FL | G2         | PRE-TERM  | 43                        | 2 | 2855                     | 3101  | 2978  | 174.1 | 2978     | 2916             | 3039             |
| 3FL | G2         | PRE-TERM  | 44                        | 3 | 1202                     | 2151  | 1522  | 544.8 | 1213     | 1208             | 1682             |
| 3FL | G2         | PRE-TERM  | 45                        | 2 | 1342                     | 2185  | 1764  | 596.2 | 1764     | 1553             | 1975             |
| 3FL | G2         | PRE-TERM  | 46                        | 2 | 2077                     | 3398  | 2738  | 933.6 | 2738     | 2407             | 3068             |
| 3FL | G2         | PRE-TERM  | 48                        | 1 | 2505                     | 2505  | 2505  | NA    | 2505     | 2505             | 2505             |
| 3FL | G2         | TERM      | 39                        | 1 | 1142                     | 1142  | 1142  | NA    | 1142     | 1142             | 1142             |
| 3FL | G2         | TERM      | 40                        | 5 | 768.8                    | 1245  | 1016  | 229.5 | 1025     | 800.0            | 1240             |
| 3FL | G2         | TERM      | 41                        | 4 | 632.0                    | 1577  | 1194  | 404.3 | 1284     | 1063             | 1415             |
| 3FL | G2         | TERM      | 42                        | 6 | 780.7                    | 1861  | 1262  | 352.8 | 1268     | 1131             | 1297             |
| 3FL | G2         | TERM      | 43                        | 5 | 782.1                    | 1675  | 1308  | 377.7 | 1381     | 1076             | 1625             |
| 3FL | G2         | TERM      | 44                        | 5 | 799.4                    | 1848  | 1425  | 464.2 | 1696     | 1062             | 1720             |
| 3FL | G2         | TERM      | 45                        | 5 | 624.3                    | 1983  | 1313  | 592.4 | 1265     | 858.8            | 1834             |
| 3FL | G2         | TERM      | 46                        | 5 | 686.5                    | 1978  | 1451  | 537.9 | 1460     | 1198             | 1931             |
| 3FL | G2         | TERM      | 47                        | 4 | 727.3                    | 2013  | 1384  | 552.8 | 1398     | 1072             | 1710             |
| 3FL | G3         | PRE-TERM  | 30                        | 1 | 64.12                    | 64.12 | 64.12 | NA    | 64.12    | 64.12            | 64.12            |
| 3FL | G3         | PRE-TERM  | 31                        | 1 | 148.3                    | 148.3 | 148.3 | NA    | 148.3    | 148.3            | 148.3            |
| 3FL | G3         | PRE-TERM  | 32                        | 1 | 181.0                    | 181.0 | 181.0 | NA    | 181.0    | 181.0            | 181.0            |
| 3FL | G3         | PRE-TERM  | 33                        | 1 | 158.0                    | 158.0 | 158.0 | NA    | 158.0    | 158.0            | 158.0            |
| 3FL | G3         | PRE-TERM  | 34                        | 1 | 215.6                    | 215.6 | 215.6 | NA    | 215.6    | 215.6            | 215.6            |
| 3FL | G3         | PRE-TERM  | 35                        | 1 | 223.4                    | 223.4 | 223.4 | NA    | 223.4    | 223.4            | 223.4            |
| 3FL | G3         | PRE-TERM  | 36                        | 1 | 254.0                    | 254.0 | 254.0 | NA    | 254.0    | 254.0            | 254.0            |
| 3FL | G3         | PRE-TERM  | 37                        | 1 | 224.9                    | 224.9 | 224.9 | NA    | 224.9    | 224.9            | 224.9            |

**Table S4 Concentration of Human Milk Oligosaccharides in Term or Preterm Milk At Specified Postmenstrual Age Separated By Milk Group**

\* When there are results below the method limit of quantification (LoQ) the result has been assigned value of  $0.5 \times \text{LoQ}$ , hence the minimum value appears to be the same in many cases. When a large number of datapoints are below LoQ this can also have the effect that the median = minimum.

| HMO  | Milk Group | Study Arm | Postmenstrual Age (weeks) | N  | HMO Concentration (mg/L) |       |       |       |          |                  |                  |
|------|------------|-----------|---------------------------|----|--------------------------|-------|-------|-------|----------|------------------|------------------|
|      |            |           |                           |    | min *                    | max   | mean  | sd    | median * | Quartile 1 (25%) | Quartile 3 (75%) |
| 3FL  | G3         | PRE-TERM  | 39                        | 1  | 241.8                    | 241.8 | 241.8 | NA    | 241.8    | 241.8            | 241.8            |
| 3FL  | G3         | PRE-TERM  | 41                        | 1  | 278.6                    | 278.6 | 278.6 | NA    | 278.6    | 278.6            | 278.6            |
| 3FL  | G3         | PRE-TERM  | 43                        | 1  | 298.6                    | 298.6 | 298.6 | NA    | 298.6    | 298.6            | 298.6            |
| 3FL  | G3         | PRE-TERM  | 45                        | 1  | 325.1                    | 325.1 | 325.1 | NA    | 325.1    | 325.1            | 325.1            |
| 3FL  | G3         | TERM      | 41                        | 1  | 39.33                    | 39.33 | 39.33 | NA    | 39.33    | 39.33            | 39.33            |
| 3FL  | G3         | TERM      | 42                        | 1  | 66.65                    | 66.65 | 66.65 | NA    | 66.65    | 66.65            | 66.65            |
| 3FL  | G3         | TERM      | 43                        | 1  | 82.63                    | 82.63 | 82.63 | NA    | 82.63    | 82.63            | 82.63            |
| 3FL  | G3         | TERM      | 44                        | 1  | 99.24                    | 99.24 | 99.24 | NA    | 99.24    | 99.24            | 99.24            |
| 3FL  | G3         | TERM      | 45                        | 1  | 95.34                    | 95.34 | 95.34 | NA    | 95.34    | 95.34            | 95.34            |
| 3FL  | G3         | TERM      | 46                        | 1  | 102.9                    | 102.9 | 102.9 | NA    | 102.9    | 102.9            | 102.9            |
| 3FL  | G3         | TERM      | 47                        | 1  | 118.2                    | 118.2 | 118.2 | NA    | 118.2    | 118.2            | 118.2            |
| 3FL  | G3         | TERM      | 48                        | 1  | 131.6                    | 131.6 | 131.6 | NA    | 131.6    | 131.6            | 131.6            |
| 3FL  | G4         | TERM      | 40                        | 1  | 224.5                    | 224.5 | 224.5 | NA    | 224.5    | 224.5            | 224.5            |
| 3FL  | G4         | TERM      | 41                        | 1  | 358.0                    | 358.0 | 358.0 | NA    | 358.0    | 358.0            | 358.0            |
| 3FL  | G4         | TERM      | 42                        | 1  | 350.3                    | 350.3 | 350.3 | NA    | 350.3    | 350.3            | 350.3            |
| 3FL  | G4         | TERM      | 43                        | 1  | 361.8                    | 361.8 | 361.8 | NA    | 361.8    | 361.8            | 361.8            |
| 3FL  | G4         | TERM      | 44                        | 1  | 390.6                    | 390.6 | 390.6 | NA    | 390.6    | 390.6            | 390.6            |
| 3FL  | G4         | TERM      | 45                        | 1  | 538.7                    | 538.7 | 538.7 | NA    | 538.7    | 538.7            | 538.7            |
| 3FL  | G4         | TERM      | 46                        | 1  | 439.5                    | 439.5 | 439.5 | NA    | 439.5    | 439.5            | 439.5            |
| 3FL  | G4         | TERM      | 47                        | 1  | 485.5                    | 485.5 | 485.5 | NA    | 485.5    | 485.5            | 485.5            |
| 6'GL | G1         | PRE-TERM  | 30                        | 7  | 40.18                    | 156.4 | 95.39 | 41.13 | 95.55    | 67.93            | 119.9            |
| 6'GL | G1         | PRE-TERM  | 31                        | 9  | 25.16                    | 109.6 | 58.70 | 28.24 | 51.04    | 40.93            | 76.93            |
| 6'GL | G1         | PRE-TERM  | 32                        | 13 | 16.66                    | 106.1 | 57.98 | 30.65 | 51.57    | 30.70            | 77.72            |
| 6'GL | G1         | PRE-TERM  | 33                        | 18 | 19.99                    | 137.9 | 50.99 | 29.64 | 43.60    | 33.96            | 56.07            |
| 6'GL | G1         | PRE-TERM  | 34                        | 19 | 16.16                    | 75.81 | 36.56 | 15.02 | 34.26    | 26.64            | 46.22            |
| 6'GL | G1         | PRE-TERM  | 35                        | 18 | 11.89                    | 55.98 | 30.12 | 11.87 | 26.07    | 23.39            | 40.08            |
| 6'GL | G1         | PRE-TERM  | 36                        | 19 | 11.33                    | 48.53 | 26.38 | 9.589 | 24.46    | 19.99            | 32.16            |
| 6'GL | G1         | PRE-TERM  | 37                        | 18 | 7.746                    | 43.71 | 24.33 | 9.809 | 23.04    | 17.33            | 30.44            |
| 6'GL | G1         | PRE-TERM  | 38                        | 11 | 15.17                    | 179.6 | 41.77 | 47.49 | 27.80    | 19.14            | 35.84            |
| 6'GL | G1         | PRE-TERM  | 39                        | 16 | 10.72                    | 33.74 | 18.97 | 6.759 | 17.51    | 13.99            | 23.49            |
| 6'GL | G1         | PRE-TERM  | 40                        | 7  | 13.55                    | 48.40 | 25.94 | 12.48 | 21.20    | 18.91            | 30.29            |
| 6'GL | G1         | PRE-TERM  | 41                        | 12 | 10.40                    | 35.95 | 21.52 | 8.511 | 19.06    | 15.78            | 27.27            |
| 6'GL | G1         | PRE-TERM  | 42                        | 6  | 9.255                    | 44.84 | 22.65 | 12.03 | 20.13    | 17.42            | 23.79            |
| 6'GL | G1         | PRE-TERM  | 43                        | 10 | 8.465                    | 32.86 | 18.61 | 7.272 | 16.36    | 13.92            | 22.48            |
| 6'GL | G1         | PRE-TERM  | 44                        | 5  | 6.997                    | 52.92 | 24.64 | 17.49 | 21.20    | 14.93            | 27.14            |
| 6'GL | G1         | PRE-TERM  | 45                        | 9  | 8.310                    | 28.68 | 15.07 | 6.759 | 11.67    | 11.12            | 20.50            |

**Table S4 Concentration of Human Milk Oligosaccharides in Term or Preterm Milk At Specified Postmenstrual Age Separated By Milk Group**

\* When there are results below the method limit of quantification (LoQ) the result has been assigned value of  $0.5 \times \text{LoQ}$ , hence the minimum value appears to be the same in many cases. When a large number of datapoints are below LoQ this can also have the effect that the median = minimum.

| HMO  | Milk Group | Study Arm | Postmenstrual Age (weeks) | N  | HMO Concentration (mg/L) |       |       |       |          |                  |                  |
|------|------------|-----------|---------------------------|----|--------------------------|-------|-------|-------|----------|------------------|------------------|
|      |            |           |                           |    | min *                    | max   | mean  | sd    | median * | Quartile 1 (25%) | Quartile 3 (75%) |
| 6'GL | G1         | PRE-TERM  | 46                        | 6  | 8.740                    | 46.05 | 20.20 | 13.52 | 15.65    | 12.87            | 21.29            |
| 6'GL | G1         | PRE-TERM  | 47                        | 3  | 11.73                    | 21.16 | 15.14 | 5.229 | 12.52    | 12.12            | 16.84            |
| 6'GL | G1         | PRE-TERM  | 48                        | 4  | 3.150                    | 15.94 | 11.41 | 5.789 | 13.28    | 9.581            | 15.11            |
| 6'GL | G1         | TERM      | 38                        | 2  | 108.2                    | 128.5 | 118.3 | 14.31 | 118.3    | 113.3            | 123.4            |
| 6'GL | G1         | TERM      | 39                        | 9  | 38.11                    | 232.6 | 105.3 | 68.50 | 105.7    | 53.98            | 110.1            |
| 6'GL | G1         | TERM      | 40                        | 13 | 12.64                    | 234.0 | 86.63 | 58.64 | 77.51    | 46.00            | 98.12            |
| 6'GL | G1         | TERM      | 41                        | 21 | 8.541                    | 170.4 | 62.53 | 42.65 | 53.13    | 33.23            | 81.07            |
| 6'GL | G1         | TERM      | 42                        | 21 | 7.969                    | 69.86 | 35.62 | 15.18 | 36.24    | 26.92            | 42.90            |
| 6'GL | G1         | TERM      | 43                        | 21 | 6.639                    | 59.96 | 29.80 | 12.34 | 31.70    | 20.87            | 36.44            |
| 6'GL | G1         | TERM      | 44                        | 20 | 3.150                    | 47.44 | 23.98 | 10.78 | 24.05    | 16.53            | 29.59            |
| 6'GL | G1         | TERM      | 45                        | 21 | 3.150                    | 68.27 | 21.60 | 14.03 | 19.23    | 13.72            | 27.35            |
| 6'GL | G1         | TERM      | 46                        | 17 | 3.150                    | 40.84 | 19.69 | 9.410 | 16.25    | 15.18            | 25.94            |
| 6'GL | G1         | TERM      | 47                        | 12 | 8.807                    | 47.47 | 19.04 | 10.83 | 14.76    | 12.37            | 23.35            |
| 6'GL | G1         | TERM      | 48                        | 6  | 9.963                    | 40.02 | 18.55 | 11.45 | 13.20    | 12.08            | 20.74            |
| 6'GL | G2         | PRE-TERM  | 29                        | 1  | 54.12                    | 54.12 | 54.12 | NA    | 54.12    | 54.12            | 54.12            |
| 6'GL | G2         | PRE-TERM  | 30                        | 2  | 29.26                    | 39.10 | 34.18 | 6.961 | 34.18    | 31.72            | 36.64            |
| 6'GL | G2         | PRE-TERM  | 31                        | 2  | 17.55                    | 39.49 | 28.52 | 15.51 | 28.52    | 23.04            | 34.01            |
| 6'GL | G2         | PRE-TERM  | 32                        | 3  | 16.82                    | 64.95 | 35.23 | 25.98 | 23.91    | 20.37            | 44.43            |
| 6'GL | G2         | PRE-TERM  | 33                        | 5  | 18.91                    | 94.25 | 50.80 | 32.87 | 38.87    | 25.75            | 76.24            |
| 6'GL | G2         | PRE-TERM  | 34                        | 5  | 21.56                    | 34.93 | 28.25 | 5.102 | 27.06    | 26.32            | 31.35            |
| 6'GL | G2         | PRE-TERM  | 35                        | 5  | 3.150                    | 32.89 | 22.84 | 11.40 | 25.95    | 25.85            | 26.36            |
| 6'GL | G2         | PRE-TERM  | 36                        | 5  | 17.65                    | 25.00 | 21.25 | 3.194 | 21.92    | 18.30            | 23.40            |
| 6'GL | G2         | PRE-TERM  | 37                        | 4  | 23.56                    | 38.77 | 27.81 | 7.344 | 24.46    | 23.66            | 28.60            |
| 6'GL | G2         | PRE-TERM  | 38                        | 4  | 12.88                    | 29.68 | 20.02 | 7.139 | 18.75    | 16.06            | 22.71            |
| 6'GL | G2         | PRE-TERM  | 39                        | 3  | 9.818                    | 16.62 | 13.75 | 3.526 | 14.82    | 12.32            | 15.72            |
| 6'GL | G2         | PRE-TERM  | 40                        | 3  | 12.86                    | 18.51 | 16.33 | 3.037 | 17.62    | 15.24            | 18.06            |
| 6'GL | G2         | PRE-TERM  | 41                        | 2  | 14.54                    | 24.69 | 19.62 | 7.175 | 19.62    | 17.08            | 22.15            |
| 6'GL | G2         | PRE-TERM  | 42                        | 3  | 13.41                    | 28.95 | 19.29 | 8.430 | 15.52    | 14.46            | 22.24            |
| 6'GL | G2         | PRE-TERM  | 43                        | 2  | 19.42                    | 27.62 | 23.52 | 5.796 | 23.52    | 21.47            | 25.57            |
| 6'GL | G2         | PRE-TERM  | 44                        | 3  | 10.43                    | 17.17 | 14.49 | 3.577 | 15.88    | 13.15            | 16.52            |
| 6'GL | G2         | PRE-TERM  | 45                        | 2  | 19.16                    | 25.56 | 22.36 | 4.523 | 22.36    | 20.76            | 23.96            |
| 6'GL | G2         | PRE-TERM  | 46                        | 2  | 13.05                    | 32.99 | 23.02 | 14.10 | 23.02    | 18.04            | 28.01            |
| 6'GL | G2         | PRE-TERM  | 48                        | 1  | 14.07                    | 14.07 | 14.07 | NA    | 14.07    | 14.07            | 14.07            |
| 6'GL | G2         | TERM      | 39                        | 1  | 122.7                    | 122.7 | 122.7 | NA    | 122.7    | 122.7            | 122.7            |
| 6'GL | G2         | TERM      | 40                        | 5  | 28.62                    | 175.0 | 127.9 | 58.55 | 134.4    | 134.2            | 167.4            |
| 6'GL | G2         | TERM      | 41                        | 4  | 15.76                    | 76.66 | 48.34 | 25.07 | 50.47    | 39.94            | 58.86            |

**Table S4 Concentration of Human Milk Oligosaccharides in Term or Preterm Milk At Specified Postmenstrual Age Separated By Milk Group**

\* When there are results below the method limit of quantification (LoQ) the result has been assigned value of  $0.5 \times \text{LoQ}$ , hence the minimum value appears to be the same in many cases. When a large number of datapoints are below LoQ this can also have the effect that the median = minimum.

| HMO  | Milk Group | Study Arm | Postmenstrual Age (weeks) | N | HMO Concentration (mg/L) |       |       |       |          |                  |                  |
|------|------------|-----------|---------------------------|---|--------------------------|-------|-------|-------|----------|------------------|------------------|
|      |            |           |                           |   | min *                    | max   | mean  | sd    | median * | Quartile 1 (25%) | Quartile 3 (75%) |
| 6'GL | G2         | TERM      | 42                        | 6 | 12.07                    | 59.61 | 37.76 | 16.70 | 34.95    | 33.04            | 48.16            |
| 6'GL | G2         | TERM      | 43                        | 5 | 3.150                    | 27.99 | 12.91 | 13.37 | 3.150    | 3.150            | 27.10            |
| 6'GL | G2         | TERM      | 44                        | 5 | 3.150                    | 39.74 | 18.63 | 14.25 | 19.70    | 8.078            | 22.47            |
| 6'GL | G2         | TERM      | 45                        | 5 | 6.478                    | 20.80 | 12.94 | 6.455 | 12.30    | 6.983            | 18.16            |
| 6'GL | G2         | TERM      | 46                        | 5 | 6.629                    | 22.00 | 15.20 | 5.632 | 16.67    | 13.79            | 16.93            |
| 6'GL | G2         | TERM      | 47                        | 4 | 13.89                    | 20.67 | 16.26 | 3.061 | 15.24    | 14.39            | 17.12            |
| 6'GL | G3         | PRE-TERM  | 30                        | 1 | 99.02                    | 99.02 | 99.02 | NA    | 99.02    | 99.02            | 99.02            |
| 6'GL | G3         | PRE-TERM  | 31                        | 1 | 51.62                    | 51.62 | 51.62 | NA    | 51.62    | 51.62            | 51.62            |
| 6'GL | G3         | PRE-TERM  | 32                        | 1 | 34.12                    | 34.12 | 34.12 | NA    | 34.12    | 34.12            | 34.12            |
| 6'GL | G3         | PRE-TERM  | 33                        | 1 | 28.35                    | 28.35 | 28.35 | NA    | 28.35    | 28.35            | 28.35            |
| 6'GL | G3         | PRE-TERM  | 34                        | 1 | 30.35                    | 30.35 | 30.35 | NA    | 30.35    | 30.35            | 30.35            |
| 6'GL | G3         | PRE-TERM  | 35                        | 1 | 30.43                    | 30.43 | 30.43 | NA    | 30.43    | 30.43            | 30.43            |
| 6'GL | G3         | PRE-TERM  | 36                        | 1 | 16.02                    | 16.02 | 16.02 | NA    | 16.02    | 16.02            | 16.02            |
| 6'GL | G3         | PRE-TERM  | 37                        | 1 | 18.65                    | 18.65 | 18.65 | NA    | 18.65    | 18.65            | 18.65            |
| 6'GL | G3         | PRE-TERM  | 39                        | 1 | 14.55                    | 14.55 | 14.55 | NA    | 14.55    | 14.55            | 14.55            |
| 6'GL | G3         | PRE-TERM  | 41                        | 1 | 13.66                    | 13.66 | 13.66 | NA    | 13.66    | 13.66            | 13.66            |
| 6'GL | G3         | PRE-TERM  | 43                        | 1 | 14.69                    | 14.69 | 14.69 | NA    | 14.69    | 14.69            | 14.69            |
| 6'GL | G3         | PRE-TERM  | 45                        | 1 | 12.31                    | 12.31 | 12.31 | NA    | 12.31    | 12.31            | 12.31            |
| 6'GL | G3         | TERM      | 41                        | 1 | 109.9                    | 109.9 | 109.9 | NA    | 109.9    | 109.9            | 109.9            |
| 6'GL | G3         | TERM      | 42                        | 1 | 50.71                    | 50.71 | 50.71 | NA    | 50.71    | 50.71            | 50.71            |
| 6'GL | G3         | TERM      | 43                        | 1 | 38.43                    | 38.43 | 38.43 | NA    | 38.43    | 38.43            | 38.43            |
| 6'GL | G3         | TERM      | 44                        | 1 | 31.73                    | 31.73 | 31.73 | NA    | 31.73    | 31.73            | 31.73            |
| 6'GL | G3         | TERM      | 45                        | 1 | 21.24                    | 21.24 | 21.24 | NA    | 21.24    | 21.24            | 21.24            |
| 6'GL | G3         | TERM      | 46                        | 1 | 16.32                    | 16.32 | 16.32 | NA    | 16.32    | 16.32            | 16.32            |
| 6'GL | G3         | TERM      | 47                        | 1 | 15.03                    | 15.03 | 15.03 | NA    | 15.03    | 15.03            | 15.03            |
| 6'GL | G3         | TERM      | 48                        | 1 | 12.89                    | 12.89 | 12.89 | NA    | 12.89    | 12.89            | 12.89            |
| 6'GL | G4         | TERM      | 40                        | 1 | 176.0                    | 176.0 | 176.0 | NA    | 176.0    | 176.0            | 176.0            |
| 6'GL | G4         | TERM      | 41                        | 1 | 92.67                    | 92.67 | 92.67 | NA    | 92.67    | 92.67            | 92.67            |
| 6'GL | G4         | TERM      | 42                        | 1 | 51.40                    | 51.40 | 51.40 | NA    | 51.40    | 51.40            | 51.40            |
| 6'GL | G4         | TERM      | 43                        | 1 | 39.76                    | 39.76 | 39.76 | NA    | 39.76    | 39.76            | 39.76            |
| 6'GL | G4         | TERM      | 44                        | 1 | 30.64                    | 30.64 | 30.64 | NA    | 30.64    | 30.64            | 30.64            |
| 6'GL | G4         | TERM      | 45                        | 1 | 39.81                    | 39.81 | 39.81 | NA    | 39.81    | 39.81            | 39.81            |
| 6'GL | G4         | TERM      | 46                        | 1 | 24.24                    | 24.24 | 24.24 | NA    | 24.24    | 24.24            | 24.24            |
| 6'GL | G4         | TERM      | 47                        | 1 | 20.55                    | 20.55 | 20.55 | NA    | 20.55    | 20.55            | 20.55            |
| 6'SL | G1         | PRE-TERM  | 30                        | 7 | 166.1                    | 656.8 | 466.5 | 200.8 | 550.1    | 330.6            | 615.5            |
| 6'SL | G1         | PRE-TERM  | 31                        | 9 | 63.98                    | 879.6 | 562.3 | 263.9 | 598.1    | 562.3            | 706.5            |

**Table S4 Concentration of Human Milk Oligosaccharides in Term or Preterm Milk At Specified Postmenstrual Age Separated By Milk Group**

\* When there are results below the method limit of quantification (LoQ) the result has been assigned value of  $0.5 \times \text{LoQ}$ , hence the minimum value appears to be the same in many cases. When a large number of datapoints are below LoQ this can also have the effect that the median = minimum.

| HMO  | Milk Group | Study Arm | Postmenstrual Age (weeks) | N  | HMO Concentration (mg/L) |       |       |       |          |                  |                  |
|------|------------|-----------|---------------------------|----|--------------------------|-------|-------|-------|----------|------------------|------------------|
|      |            |           |                           |    | min *                    | max   | mean  | sd    | median * | Quartile 1 (25%) | Quartile 3 (75%) |
| 6'SL | G1         | PRE-TERM  | 32                        | 13 | 74.88                    | 1132  | 589.2 | 270.9 | 623.3    | 555.8            | 742.3            |
| 6'SL | G1         | PRE-TERM  | 33                        | 18 | 61.36                    | 1135  | 516.0 | 280.1 | 522.5    | 329.0            | 671.9            |
| 6'SL | G1         | PRE-TERM  | 34                        | 19 | 77.87                    | 926.1 | 435.5 | 236.8 | 424.7    | 234.3            | 555.4            |
| 6'SL | G1         | PRE-TERM  | 35                        | 18 | 106.1                    | 695.8 | 393.3 | 164.7 | 432.2    | 282.1            | 496.1            |
| 6'SL | G1         | PRE-TERM  | 36                        | 19 | 139.1                    | 565.1 | 347.9 | 145.9 | 376.6    | 218.1            | 459.4            |
| 6'SL | G1         | PRE-TERM  | 37                        | 18 | 116.1                    | 476.6 | 299.1 | 108.8 | 314.3    | 212.0            | 378.5            |
| 6'SL | G1         | PRE-TERM  | 38                        | 11 | 10.00                    | 394.0 | 258.2 | 108.0 | 284.6    | 228.5            | 309.4            |
| 6'SL | G1         | PRE-TERM  | 39                        | 16 | 107.3                    | 383.8 | 205.4 | 78.33 | 188.1    | 152.5            | 231.5            |
| 6'SL | G1         | PRE-TERM  | 40                        | 7  | 135.1                    | 401.4 | 232.2 | 111.4 | 158.9    | 145.5            | 319.3            |
| 6'SL | G1         | PRE-TERM  | 41                        | 12 | 89.80                    | 199.9 | 153.3 | 34.29 | 156.1    | 139.1            | 175.4            |
| 6'SL | G1         | PRE-TERM  | 42                        | 6  | 105.0                    | 271.0 | 186.4 | 85.27 | 186.0    | 108.1            | 262.9            |
| 6'SL | G1         | PRE-TERM  | 43                        | 10 | 77.47                    | 185.6 | 121.2 | 37.02 | 106.2    | 94.83            | 150.4            |
| 6'SL | G1         | PRE-TERM  | 44                        | 5  | 84.36                    | 212.2 | 163.0 | 49.65 | 165.2    | 155.7            | 197.7            |
| 6'SL | G1         | PRE-TERM  | 45                        | 9  | 46.43                    | 176.7 | 97.68 | 43.38 | 85.22    | 61.73            | 126.5            |
| 6'SL | G1         | PRE-TERM  | 46                        | 6  | 61.11                    | 196.6 | 125.1 | 54.95 | 115.8    | 84.79            | 168.9            |
| 6'SL | G1         | PRE-TERM  | 47                        | 3  | 79.24                    | 109.6 | 95.55 | 15.29 | 97.87    | 88.55            | 103.7            |
| 6'SL | G1         | PRE-TERM  | 48                        | 4  | 48.01                    | 142.2 | 78.59 | 43.01 | 62.07    | 56.20            | 84.46            |
| 6'SL | G1         | TERM      | 38                        | 2  | 313.5                    | 442.1 | 377.8 | 90.97 | 377.8    | 345.7            | 410.0            |
| 6'SL | G1         | TERM      | 39                        | 9  | 222.0                    | 706.2 | 434.5 | 136.5 | 429.6    | 363.7            | 515.2            |
| 6'SL | G1         | TERM      | 40                        | 13 | 325.3                    | 1084  | 605.1 | 226.5 | 581.8    | 428.5            | 692.4            |
| 6'SL | G1         | TERM      | 41                        | 21 | 216.1                    | 985.4 | 585.4 | 207.5 | 552.4    | 440.2            | 775.3            |
| 6'SL | G1         | TERM      | 42                        | 21 | 198.9                    | 821.3 | 570.2 | 185.8 | 578.1    | 463.3            | 701.3            |
| 6'SL | G1         | TERM      | 43                        | 21 | 153.7                    | 792.3 | 482.4 | 183.9 | 511.6    | 343.0            | 588.8            |
| 6'SL | G1         | TERM      | 44                        | 20 | 24.60                    | 574.6 | 355.1 | 156.8 | 406.7    | 252.3            | 450.9            |
| 6'SL | G1         | TERM      | 45                        | 21 | 93.75                    | 700.9 | 324.7 | 149.5 | 340.6    | 213.6            | 397.6            |
| 6'SL | G1         | TERM      | 46                        | 17 | 53.06                    | 662.3 | 292.4 | 138.9 | 264.3    | 219.4            | 325.9            |
| 6'SL | G1         | TERM      | 47                        | 12 | 99.59                    | 671.2 | 283.1 | 154.6 | 253.2    | 194.4            | 325.3            |
| 6'SL | G1         | TERM      | 48                        | 6  | 145.8                    | 301.0 | 206.9 | 57.71 | 193.6    | 168.6            | 234.0            |
| 6'SL | G2         | PRE-TERM  | 29                        | 1  | 303.3                    | 303.3 | 303.3 | NA    | 303.3    | 303.3            | 303.3            |
| 6'SL | G2         | PRE-TERM  | 30                        | 2  | 145.3                    | 224.7 | 185.0 | 56.15 | 185.0    | 165.2            | 204.9            |
| 6'SL | G2         | PRE-TERM  | 31                        | 2  | 86.13                    | 309.8 | 198.0 | 158.1 | 198.0    | 142.0            | 253.9            |
| 6'SL | G2         | PRE-TERM  | 32                        | 3  | 61.39                    | 263.9 | 185.3 | 108.6 | 230.5    | 145.9            | 247.2            |
| 6'SL | G2         | PRE-TERM  | 33                        | 5  | 53.89                    | 501.0 | 342.9 | 175.5 | 367.0    | 331.6            | 461.0            |
| 6'SL | G2         | PRE-TERM  | 34                        | 5  | 74.89                    | 559.2 | 326.9 | 172.0 | 328.2    | 318.4            | 353.9            |
| 6'SL | G2         | PRE-TERM  | 35                        | 5  | 74.47                    | 555.9 | 317.1 | 171.7 | 301.0    | 299.8            | 354.5            |
| 6'SL | G2         | PRE-TERM  | 36                        | 5  | 55.02                    | 467.7 | 270.2 | 148.2 | 264.0    | 249.1            | 315.4            |

**Table S4 Concentration of Human Milk Oligosaccharides in Term or Preterm Milk At Specified Postmenstrual Age Separated By Milk Group**

\* When there are results below the method limit of quantification (LoQ) the result has been assigned value of  $0.5 \times \text{LoQ}$ , hence the minimum value appears to be the same in many cases. When a large number of datapoints are below LoQ this can also have the effect that the median = minimum.

| HMO  | Milk Group | Study Arm | Postmenstrual Age (weeks) | N | HMO Concentration (mg/L) |       |       |       |          |                  |                  |
|------|------------|-----------|---------------------------|---|--------------------------|-------|-------|-------|----------|------------------|------------------|
|      |            |           |                           |   | min *                    | max   | mean  | sd    | median * | Quartile 1 (25%) | Quartile 3 (75%) |
| 6'SL | G2         | PRE-TERM  | 37                        | 4 | 57.52                    | 313.4 | 206.6 | 108.4 | 227.6    | 170.5            | 263.6            |
| 6'SL | G2         | PRE-TERM  | 38                        | 4 | 177.8                    | 325.7 | 235.9 | 67.41 | 220.1    | 187.7            | 268.3            |
| 6'SL | G2         | PRE-TERM  | 39                        | 3 | 142.1                    | 296.6 | 202.2 | 82.75 | 168.0    | 155.0            | 232.3            |
| 6'SL | G2         | PRE-TERM  | 40                        | 3 | 146.4                    | 208.3 | 185.7 | 34.16 | 202.3    | 174.3            | 205.3            |
| 6'SL | G2         | PRE-TERM  | 41                        | 2 | 122.1                    | 171.1 | 146.6 | 34.62 | 146.6    | 134.4            | 158.9            |
| 6'SL | G2         | PRE-TERM  | 42                        | 3 | 100.6                    | 171.4 | 143.6 | 37.77 | 158.9    | 129.8            | 165.1            |
| 6'SL | G2         | PRE-TERM  | 43                        | 2 | 69.80                    | 114.2 | 91.99 | 31.39 | 91.99    | 80.90            | 103.1            |
| 6'SL | G2         | PRE-TERM  | 44                        | 3 | 65.69                    | 156.3 | 119.1 | 47.42 | 135.2    | 100.4            | 145.8            |
| 6'SL | G2         | PRE-TERM  | 45                        | 2 | 77.58                    | 109.5 | 93.53 | 22.56 | 93.53    | 85.55            | 101.5            |
| 6'SL | G2         | PRE-TERM  | 46                        | 2 | 74.24                    | 145.4 | 109.8 | 50.29 | 109.8    | 92.02            | 127.6            |
| 6'SL | G2         | PRE-TERM  | 48                        | 1 | 126.1                    | 126.1 | 126.1 | NA    | 126.1    | 126.1            | 126.1            |
| 6'SL | G2         | TERM      | 39                        | 1 | 374.6                    | 374.6 | 374.6 | NA    | 374.6    | 374.6            | 374.6            |
| 6'SL | G2         | TERM      | 40                        | 5 | 295.7                    | 634.7 | 452.3 | 164.2 | 401.4    | 311.3            | 618.4            |
| 6'SL | G2         | TERM      | 41                        | 4 | 262.0                    | 786.1 | 557.9 | 257.1 | 591.8    | 383.3            | 766.3            |
| 6'SL | G2         | TERM      | 42                        | 6 | 202.8                    | 718.6 | 476.2 | 178.0 | 507.9    | 389.4            | 554.6            |
| 6'SL | G2         | TERM      | 43                        | 5 | 129.4                    | 623.8 | 403.0 | 184.2 | 457.8    | 334.8            | 469.3            |
| 6'SL | G2         | TERM      | 44                        | 5 | 112.5                    | 549.1 | 332.9 | 163.0 | 365.6    | 249.8            | 387.3            |
| 6'SL | G2         | TERM      | 45                        | 5 | 89.66                    | 318.7 | 200.0 | 96.04 | 179.5    | 134.9            | 277.4            |
| 6'SL | G2         | TERM      | 46                        | 5 | 86.83                    | 234.6 | 173.1 | 73.64 | 220.1    | 98.67            | 225.2            |
| 6'SL | G2         | TERM      | 47                        | 4 | 129.6                    | 211.6 | 180.6 | 37.30 | 190.6    | 164.5            | 206.6            |
| 6'SL | G3         | PRE-TERM  | 30                        | 1 | 673.9                    | 673.9 | 673.9 | NA    | 673.9    | 673.9            | 673.9            |
| 6'SL | G3         | PRE-TERM  | 31                        | 1 | 654.3                    | 654.3 | 654.3 | NA    | 654.3    | 654.3            | 654.3            |
| 6'SL | G3         | PRE-TERM  | 32                        | 1 | 441.3                    | 441.3 | 441.3 | NA    | 441.3    | 441.3            | 441.3            |
| 6'SL | G3         | PRE-TERM  | 33                        | 1 | 324.0                    | 324.0 | 324.0 | NA    | 324.0    | 324.0            | 324.0            |
| 6'SL | G3         | PRE-TERM  | 34                        | 1 | 270.7                    | 270.7 | 270.7 | NA    | 270.7    | 270.7            | 270.7            |
| 6'SL | G3         | PRE-TERM  | 35                        | 1 | 229.1                    | 229.1 | 229.1 | NA    | 229.1    | 229.1            | 229.1            |
| 6'SL | G3         | PRE-TERM  | 36                        | 1 | 128.6                    | 128.6 | 128.6 | NA    | 128.6    | 128.6            | 128.6            |
| 6'SL | G3         | PRE-TERM  | 37                        | 1 | 138.2                    | 138.2 | 138.2 | NA    | 138.2    | 138.2            | 138.2            |
| 6'SL | G3         | PRE-TERM  | 39                        | 1 | 91.24                    | 91.24 | 91.24 | NA    | 91.24    | 91.24            | 91.24            |
| 6'SL | G3         | PRE-TERM  | 41                        | 1 | 72.75                    | 72.75 | 72.75 | NA    | 72.75    | 72.75            | 72.75            |
| 6'SL | G3         | PRE-TERM  | 43                        | 1 | 60.09                    | 60.09 | 60.09 | NA    | 60.09    | 60.09            | 60.09            |
| 6'SL | G3         | PRE-TERM  | 45                        | 1 | 48.01                    | 48.01 | 48.01 | NA    | 48.01    | 48.01            | 48.01            |
| 6'SL | G3         | TERM      | 41                        | 1 | 648.7                    | 648.7 | 648.7 | NA    | 648.7    | 648.7            | 648.7            |
| 6'SL | G3         | TERM      | 42                        | 1 | 598.9                    | 598.9 | 598.9 | NA    | 598.9    | 598.9            | 598.9            |
| 6'SL | G3         | TERM      | 43                        | 1 | 511.9                    | 511.9 | 511.9 | NA    | 511.9    | 511.9            | 511.9            |
| 6'SL | G3         | TERM      | 44                        | 1 | 419.6                    | 419.6 | 419.6 | NA    | 419.6    | 419.6            | 419.6            |

**Table S4 Concentration of Human Milk Oligosaccharides in Term or Preterm Milk At Specified Postmenstrual Age Separated By Milk Group**

\* When there are results below the method limit of quantification (LoQ) the result has been assigned value of  $0.5 \times \text{LoQ}$ , hence the minimum value appears to be the same in many cases. When a large number of datapoints are below LoQ this can also have the effect that the median = minimum.

| HMO               | Milk Group | Study Arm | Postmenstrual Age (weeks) | N  | HMO Concentration (mg/L) |       |       |        |          |                  |                  |
|-------------------|------------|-----------|---------------------------|----|--------------------------|-------|-------|--------|----------|------------------|------------------|
|                   |            |           |                           |    | min *                    | max   | mean  | sd     | median * | Quartile 1 (25%) | Quartile 3 (75%) |
| 6'SL              | G3         | TERM      | 45                        | 1  | 355.0                    | 355.0 | 355.0 | NA     | 355.0    | 355.0            | 355.0            |
| 6'SL              | G3         | TERM      | 46                        | 1  | 294.2                    | 294.2 | 294.2 | NA     | 294.2    | 294.2            | 294.2            |
| 6'SL              | G3         | TERM      | 47                        | 1  | 273.7                    | 273.7 | 273.7 | NA     | 273.7    | 273.7            | 273.7            |
| 6'SL              | G3         | TERM      | 48                        | 1  | 192.3                    | 192.3 | 192.3 | NA     | 192.3    | 192.3            | 192.3            |
| 6'SL              | G4         | TERM      | 40                        | 1  | 436.4                    | 436.4 | 436.4 | NA     | 436.4    | 436.4            | 436.4            |
| 6'SL              | G4         | TERM      | 41                        | 1  | 888.0                    | 888.0 | 888.0 | NA     | 888.0    | 888.0            | 888.0            |
| 6'SL              | G4         | TERM      | 42                        | 1  | 670.5                    | 670.5 | 670.5 | NA     | 670.5    | 670.5            | 670.5            |
| 6'SL              | G4         | TERM      | 43                        | 1  | 489.7                    | 489.7 | 489.7 | NA     | 489.7    | 489.7            | 489.7            |
| 6'SL              | G4         | TERM      | 44                        | 1  | 357.8                    | 357.8 | 357.8 | NA     | 357.8    | 357.8            | 357.8            |
| 6'SL              | G4         | TERM      | 45                        | 1  | 305.6                    | 305.6 | 305.6 | NA     | 305.6    | 305.6            | 305.6            |
| 6'SL              | G4         | TERM      | 46                        | 1  | 193.1                    | 193.1 | 193.1 | NA     | 193.1    | 193.1            | 193.1            |
| 6'SL              | G4         | TERM      | 47                        | 1  | 150.4                    | 150.4 | 150.4 | NA     | 150.4    | 150.4            | 150.4            |
| A-Tetrasaccharide | G1         | PRE-TERM  | 30                        | 7  | 7.500                    | 166.6 | 35.16 | 59.36  | 7.500    | 7.500            | 24.77            |
| A-Tetrasaccharide | G1         | PRE-TERM  | 31                        | 9  | 7.500                    | 70.30 | 22.86 | 25.65  | 7.500    | 7.500            | 27.92            |
| A-Tetrasaccharide | G1         | PRE-TERM  | 32                        | 13 | 7.500                    | 315.1 | 59.67 | 92.18  | 7.500    | 7.500            | 63.10            |
| A-Tetrasaccharide | G1         | PRE-TERM  | 33                        | 18 | 7.500                    | 232.5 | 63.50 | 76.51  | 16.56    | 7.500            | 111.3            |
| A-Tetrasaccharide | G1         | PRE-TERM  | 34                        | 19 | 7.500                    | 250.0 | 42.26 | 69.11  | 7.500    | 7.500            | 29.69            |
| A-Tetrasaccharide | G1         | PRE-TERM  | 35                        | 18 | 7.500                    | 224.7 | 54.04 | 74.85  | 7.500    | 7.500            | 75.70            |
| A-Tetrasaccharide | G1         | PRE-TERM  | 36                        | 19 | 7.500                    | 226.0 | 51.82 | 73.58  | 7.500    | 7.500            | 70.55            |
| A-Tetrasaccharide | G1         | PRE-TERM  | 37                        | 18 | 7.500                    | 232.6 | 49.80 | 68.75  | 7.500    | 7.500            | 80.93            |
| A-Tetrasaccharide | G1         | PRE-TERM  | 38                        | 11 | 7.500                    | 266.6 | 79.38 | 98.02  | 29.48    | 7.500            | 127.6            |
| A-Tetrasaccharide | G1         | PRE-TERM  | 39                        | 16 | 7.500                    | 322.7 | 58.57 | 98.16  | 7.500    | 7.500            | 46.20            |
| A-Tetrasaccharide | G1         | PRE-TERM  | 40                        | 7  | 7.500                    | 113.0 | 38.84 | 48.46  | 7.500    | 7.500            | 64.43            |
| A-Tetrasaccharide | G1         | PRE-TERM  | 41                        | 12 | 7.500                    | 334.5 | 59.46 | 103.5  | 7.500    | 7.500            | 43.59            |
| A-Tetrasaccharide | G1         | PRE-TERM  | 42                        | 6  | 7.500                    | 101.9 | 41.03 | 46.46  | 15.07    | 7.500            | 80.02            |
| A-Tetrasaccharide | G1         | PRE-TERM  | 43                        | 10 | 7.500                    | 300.7 | 62.70 | 102.0  | 7.500    | 7.500            | 68.70            |
| A-Tetrasaccharide | G1         | PRE-TERM  | 44                        | 5  | 7.500                    | 86.79 | 26.38 | 34.40  | 7.500    | 7.500            | 22.62            |
| A-Tetrasaccharide | G1         | PRE-TERM  | 45                        | 9  | 7.500                    | 329.8 | 67.31 | 109.5  | 7.500    | 7.500            | 76.21            |
| A-Tetrasaccharide | G1         | PRE-TERM  | 46                        | 6  | 7.500                    | 132.3 | 47.60 | 55.13  | 18.55    | 7.500            | 83.31            |
| A-Tetrasaccharide | G1         | PRE-TERM  | 47                        | 3  | 7.500                    | 144.8 | 77.28 | 68.69  | 79.52    | 43.51            | 112.2            |
| A-Tetrasaccharide | G1         | PRE-TERM  | 48                        | 4  | 7.500                    | 102.4 | 38.41 | 44.78  | 21.85    | 7.500            | 52.75            |
| A-Tetrasaccharide | G1         | TERM      | 38                        | 2  | 7.500                    | 7.500 | 7.500 | 0.0000 | 7.500    | 7.500            | 7.500            |
| A-Tetrasaccharide | G1         | TERM      | 39                        | 9  | 7.500                    | 188.2 | 39.40 | 60.37  | 7.500    | 7.500            | 59.33            |
| A-Tetrasaccharide | G1         | TERM      | 40                        | 13 | 7.500                    | 154.4 | 40.96 | 45.36  | 39.01    | 7.500            | 43.87            |
| A-Tetrasaccharide | G1         | TERM      | 41                        | 21 | 7.500                    | 150.2 | 30.18 | 37.43  | 7.500    | 7.500            | 40.31            |
| A-Tetrasaccharide | G1         | TERM      | 42                        | 21 | 7.500                    | 149.0 | 29.66 | 38.74  | 7.500    | 7.500            | 39.78            |

**Table S4 Concentration of Human Milk Oligosaccharides in Term or Preterm Milk At Specified Postmenstrual Age Separated By Milk Group**

\* When there are results below the method limit of quantification (LoQ) the result has been assigned value of  $0.5 \times \text{LoQ}$ , hence the minimum value appears to be the same in many cases. When a large number of datapoints are below LoQ this can also have the effect that the median = minimum.

| HMO               | Milk Group | Study Arm | Postmenstrual Age (weeks) | N  | HMO Concentration (mg/L) |       |       |        |          |                  |                  |
|-------------------|------------|-----------|---------------------------|----|--------------------------|-------|-------|--------|----------|------------------|------------------|
|                   |            |           |                           |    | min *                    | max   | mean  | sd     | median * | Quartile 1 (25%) | Quartile 3 (75%) |
| A-Tetrasaccharide | G1         | TERM      | 43                        | 21 | 7.500                    | 153.9 | 30.04 | 38.48  | 7.500    | 7.500            | 35.93            |
| A-Tetrasaccharide | G1         | TERM      | 44                        | 20 | 7.500                    | 162.3 | 31.15 | 41.34  | 11.26    | 7.500            | 29.04            |
| A-Tetrasaccharide | G1         | TERM      | 45                        | 21 | 7.500                    | 138.9 | 27.46 | 37.58  | 7.500    | 7.500            | 29.91            |
| A-Tetrasaccharide | G1         | TERM      | 46                        | 17 | 7.500                    | 183.8 | 37.09 | 50.05  | 7.500    | 7.500            | 39.48            |
| A-Tetrasaccharide | G1         | TERM      | 47                        | 12 | 7.500                    | 165.4 | 38.68 | 53.12  | 7.500    | 7.500            | 55.70            |
| A-Tetrasaccharide | G1         | TERM      | 48                        | 6  | 7.500                    | 181.0 | 52.72 | 74.03  | 7.500    | 7.500            | 80.83            |
| A-Tetrasaccharide | G2         | PRE-TERM  | 29                        | 1  | 7.500                    | 7.500 | 7.500 | NA     | 7.500    | 7.500            | 7.500            |
| A-Tetrasaccharide | G2         | PRE-TERM  | 30                        | 2  | 7.500                    | 7.500 | 7.500 | 0.0000 | 7.500    | 7.500            | 7.500            |
| A-Tetrasaccharide | G2         | PRE-TERM  | 31                        | 2  | 7.500                    | 7.500 | 7.500 | 0.0000 | 7.500    | 7.500            | 7.500            |
| A-Tetrasaccharide | G2         | PRE-TERM  | 32                        | 3  | 7.500                    | 7.500 | 7.500 | 0.0000 | 7.500    | 7.500            | 7.500            |
| A-Tetrasaccharide | G2         | PRE-TERM  | 33                        | 5  | 7.500                    | 7.500 | 7.500 | 0.0000 | 7.500    | 7.500            | 7.500            |
| A-Tetrasaccharide | G2         | PRE-TERM  | 34                        | 5  | 7.500                    | 7.500 | 7.500 | 0.0000 | 7.500    | 7.500            | 7.500            |
| A-Tetrasaccharide | G2         | PRE-TERM  | 35                        | 5  | 7.500                    | 16.81 | 9.361 | 4.162  | 7.500    | 7.500            | 7.500            |
| A-Tetrasaccharide | G2         | PRE-TERM  | 36                        | 5  | 7.500                    | 7.500 | 7.500 | 0.0000 | 7.500    | 7.500            | 7.500            |
| A-Tetrasaccharide | G2         | PRE-TERM  | 37                        | 4  | 7.500                    | 7.500 | 7.500 | 0.0000 | 7.500    | 7.500            | 7.500            |
| A-Tetrasaccharide | G2         | PRE-TERM  | 38                        | 4  | 7.500                    | 7.500 | 7.500 | 0.0000 | 7.500    | 7.500            | 7.500            |
| A-Tetrasaccharide | G2         | PRE-TERM  | 39                        | 3  | 7.500                    | 7.500 | 7.500 | 0.0000 | 7.500    | 7.500            | 7.500            |
| A-Tetrasaccharide | G2         | PRE-TERM  | 40                        | 3  | 7.500                    | 7.500 | 7.500 | 0.0000 | 7.500    | 7.500            | 7.500            |
| A-Tetrasaccharide | G2         | PRE-TERM  | 41                        | 2  | 7.500                    | 7.500 | 7.500 | 0.0000 | 7.500    | 7.500            | 7.500            |
| A-Tetrasaccharide | G2         | PRE-TERM  | 42                        | 3  | 7.500                    | 7.500 | 7.500 | 0.0000 | 7.500    | 7.500            | 7.500            |
| A-Tetrasaccharide | G2         | PRE-TERM  | 43                        | 2  | 7.500                    | 7.500 | 7.500 | 0.0000 | 7.500    | 7.500            | 7.500            |
| A-Tetrasaccharide | G2         | PRE-TERM  | 44                        | 3  | 7.500                    | 7.500 | 7.500 | 0.0000 | 7.500    | 7.500            | 7.500            |
| A-Tetrasaccharide | G2         | PRE-TERM  | 45                        | 2  | 7.500                    | 7.500 | 7.500 | 0.0000 | 7.500    | 7.500            | 7.500            |
| A-Tetrasaccharide | G2         | PRE-TERM  | 46                        | 2  | 7.500                    | 7.500 | 7.500 | 0.0000 | 7.500    | 7.500            | 7.500            |
| A-Tetrasaccharide | G2         | PRE-TERM  | 48                        | 1  | 7.500                    | 7.500 | 7.500 | NA     | 7.500    | 7.500            | 7.500            |
| A-Tetrasaccharide | G2         | TERM      | 39                        | 1  | 7.500                    | 7.500 | 7.500 | NA     | 7.500    | 7.500            | 7.500            |
| A-Tetrasaccharide | G2         | TERM      | 40                        | 5  | 7.500                    | 7.500 | 7.500 | 0.0000 | 7.500    | 7.500            | 7.500            |
| A-Tetrasaccharide | G2         | TERM      | 41                        | 4  | 7.500                    | 7.500 | 7.500 | 0.0000 | 7.500    | 7.500            | 7.500            |
| A-Tetrasaccharide | G2         | TERM      | 42                        | 6  | 7.500                    | 7.500 | 7.500 | 0.0000 | 7.500    | 7.500            | 7.500            |
| A-Tetrasaccharide | G2         | TERM      | 43                        | 5  | 7.500                    | 28.98 | 11.80 | 9.605  | 7.500    | 7.500            | 7.500            |
| A-Tetrasaccharide | G2         | TERM      | 44                        | 5  | 7.500                    | 27.37 | 11.47 | 8.886  | 7.500    | 7.500            | 7.500            |
| A-Tetrasaccharide | G2         | TERM      | 45                        | 5  | 7.500                    | 7.500 | 7.500 | 0.0000 | 7.500    | 7.500            | 7.500            |
| A-Tetrasaccharide | G2         | TERM      | 46                        | 5  | 7.500                    | 7.500 | 7.500 | 0.0000 | 7.500    | 7.500            | 7.500            |
| A-Tetrasaccharide | G2         | TERM      | 47                        | 4  | 7.500                    | 7.500 | 7.500 | 0.0000 | 7.500    | 7.500            | 7.500            |
| A-Tetrasaccharide | G3         | PRE-TERM  | 30                        | 1  | 7.500                    | 7.500 | 7.500 | NA     | 7.500    | 7.500            | 7.500            |
| A-Tetrasaccharide | G3         | PRE-TERM  | 31                        | 1  | 7.500                    | 7.500 | 7.500 | NA     | 7.500    | 7.500            | 7.500            |



**Table S4 Concentration of Human Milk Oligosaccharides in Term or Preterm Milk At Specified Postmenstrual Age Separated By Milk Group**

\* When there are results below the method limit of quantification (LoQ) the result has been assigned value of  $0.5 \times \text{LoQ}$ , hence the minimum value appears to be the same in many cases. When a large number of datapoints are below LoQ this can also have the effect that the median = minimum.

| HMO               | Milk Group | Study Arm | Postmenstrual Age (weeks) | N  | HMO Concentration (mg/L) |       |       |       |          |                  |                  |
|-------------------|------------|-----------|---------------------------|----|--------------------------|-------|-------|-------|----------|------------------|------------------|
|                   |            |           |                           |    | min *                    | max   | mean  | sd    | median * | Quartile 1 (25%) | Quartile 3 (75%) |
| A-Tetrasaccharide | G3         | PRE-TERM  | 32                        | 1  | 7.500                    | 7.500 | 7.500 | NA    | 7.500    | 7.500            | 7.500            |
| A-Tetrasaccharide | G3         | PRE-TERM  | 33                        | 1  | 7.500                    | 7.500 | 7.500 | NA    | 7.500    | 7.500            | 7.500            |
| A-Tetrasaccharide | G3         | PRE-TERM  | 34                        | 1  | 7.500                    | 7.500 | 7.500 | NA    | 7.500    | 7.500            | 7.500            |
| A-Tetrasaccharide | G3         | PRE-TERM  | 35                        | 1  | 7.500                    | 7.500 | 7.500 | NA    | 7.500    | 7.500            | 7.500            |
| A-Tetrasaccharide | G3         | PRE-TERM  | 36                        | 1  | 7.500                    | 7.500 | 7.500 | NA    | 7.500    | 7.500            | 7.500            |
| A-Tetrasaccharide | G3         | PRE-TERM  | 37                        | 1  | 7.500                    | 7.500 | 7.500 | NA    | 7.500    | 7.500            | 7.500            |
| A-Tetrasaccharide | G3         | PRE-TERM  | 39                        | 1  | 7.500                    | 7.500 | 7.500 | NA    | 7.500    | 7.500            | 7.500            |
| A-Tetrasaccharide | G3         | PRE-TERM  | 41                        | 1  | 7.500                    | 7.500 | 7.500 | NA    | 7.500    | 7.500            | 7.500            |
| A-Tetrasaccharide | G3         | PRE-TERM  | 43                        | 1  | 7.500                    | 7.500 | 7.500 | NA    | 7.500    | 7.500            | 7.500            |
| A-Tetrasaccharide | G3         | PRE-TERM  | 45                        | 1  | 7.500                    | 7.500 | 7.500 | NA    | 7.500    | 7.500            | 7.500            |
| A-Tetrasaccharide | G3         | TERM      | 41                        | 1  | 43.15                    | 43.15 | 43.15 | NA    | 43.15    | 43.15            | 43.15            |
| A-Tetrasaccharide | G3         | TERM      | 42                        | 1  | 47.28                    | 47.28 | 47.28 | NA    | 47.28    | 47.28            | 47.28            |
| A-Tetrasaccharide | G3         | TERM      | 43                        | 1  | 46.17                    | 46.17 | 46.17 | NA    | 46.17    | 46.17            | 46.17            |
| A-Tetrasaccharide | G3         | TERM      | 44                        | 1  | 41.87                    | 41.87 | 41.87 | NA    | 41.87    | 41.87            | 41.87            |
| A-Tetrasaccharide | G3         | TERM      | 45                        | 1  | 36.38                    | 36.38 | 36.38 | NA    | 36.38    | 36.38            | 36.38            |
| A-Tetrasaccharide | G3         | TERM      | 46                        | 1  | 37.04                    | 37.04 | 37.04 | NA    | 37.04    | 37.04            | 37.04            |
| A-Tetrasaccharide | G3         | TERM      | 47                        | 1  | 27.14                    | 27.14 | 27.14 | NA    | 27.14    | 27.14            | 27.14            |
| A-Tetrasaccharide | G3         | TERM      | 48                        | 1  | 33.98                    | 33.98 | 33.98 | NA    | 33.98    | 33.98            | 33.98            |
| A-Tetrasaccharide | G4         | TERM      | 40                        | 1  | 7.500                    | 7.500 | 7.500 | NA    | 7.500    | 7.500            | 7.500            |
| A-Tetrasaccharide | G4         | TERM      | 41                        | 1  | 7.500                    | 7.500 | 7.500 | NA    | 7.500    | 7.500            | 7.500            |
| A-Tetrasaccharide | G4         | TERM      | 42                        | 1  | 7.500                    | 7.500 | 7.500 | NA    | 7.500    | 7.500            | 7.500            |
| A-Tetrasaccharide | G4         | TERM      | 43                        | 1  | 7.500                    | 7.500 | 7.500 | NA    | 7.500    | 7.500            | 7.500            |
| A-Tetrasaccharide | G4         | TERM      | 44                        | 1  | 7.500                    | 7.500 | 7.500 | NA    | 7.500    | 7.500            | 7.500            |
| A-Tetrasaccharide | G4         | TERM      | 45                        | 1  | 7.500                    | 7.500 | 7.500 | NA    | 7.500    | 7.500            | 7.500            |
| A-Tetrasaccharide | G4         | TERM      | 46                        | 1  | 7.500                    | 7.500 | 7.500 | NA    | 7.500    | 7.500            | 7.500            |
| A-Tetrasaccharide | G4         | TERM      | 47                        | 1  | 7.500                    | 7.500 | 7.500 | NA    | 7.500    | 7.500            | 7.500            |
| DFLNHa            | G1         | PRE-TERM  | 30                        | 7  | 16.50                    | 266.3 | 140.5 | 91.70 | 132.0    | 79.18            | 205.1            |
| DFLNHa            | G1         | PRE-TERM  | 31                        | 9  | 16.50                    | 448.7 | 225.1 | 165.6 | 197.9    | 95.57            | 383.8            |
| DFLNHa            | G1         | PRE-TERM  | 32                        | 13 | 16.50                    | 420.0 | 210.8 | 128.9 | 201.2    | 111.1            | 334.0            |
| DFLNHa            | G1         | PRE-TERM  | 33                        | 18 | 16.50                    | 354.5 | 209.0 | 116.9 | 245.1    | 103.4            | 306.7            |
| DFLNHa            | G1         | PRE-TERM  | 34                        | 19 | 16.50                    | 291.2 | 154.1 | 87.41 | 126.6    | 81.00            | 231.7            |
| DFLNHa            | G1         | PRE-TERM  | 35                        | 18 | 16.50                    | 229.0 | 132.1 | 59.63 | 147.2    | 103.3            | 170.2            |
| DFLNHa            | G1         | PRE-TERM  | 36                        | 19 | 16.50                    | 295.0 | 152.8 | 79.73 | 143.3    | 97.78            | 192.6            |
| DFLNHa            | G1         | PRE-TERM  | 37                        | 18 | 16.50                    | 252.0 | 117.8 | 66.39 | 114.9    | 74.98            | 153.4            |
| DFLNHa            | G1         | PRE-TERM  | 38                        | 11 | 16.50                    | 685.1 | 149.2 | 182.6 | 107.6    | 69.52            | 143.6            |
| DFLNHa            | G1         | PRE-TERM  | 39                        | 16 | 16.50                    | 142.9 | 70.59 | 42.51 | 72.94    | 31.91            | 97.26            |

**Table S4 Concentration of Human Milk Oligosaccharides in Term or Preterm Milk At Specified Postmenstrual Age Separated By Milk Group**

\* When there are results below the method limit of quantification (LoQ) the result has been assigned value of  $0.5 \times \text{LoQ}$ , hence the minimum value appears to be the same in many cases. When a large number of datapoints are below LoQ this can also have the effect that the median = minimum.

| HMO    | Milk Group | Study Arm | Postmenstrual Age (weeks) | N  | HMO Concentration (mg/L) |       |       |        |          |                  |                  |
|--------|------------|-----------|---------------------------|----|--------------------------|-------|-------|--------|----------|------------------|------------------|
|        |            |           |                           |    | min *                    | max   | mean  | sd     | median * | Quartile 1 (25%) | Quartile 3 (75%) |
| DFLNHa | G1         | PRE-TERM  | 40                        | 7  | 16.50                    | 230.0 | 102.9 | 73.30  | 67.08    | 61.51            | 142.0            |
| DFLNHa | G1         | PRE-TERM  | 41                        | 12 | 16.50                    | 83.83 | 40.55 | 22.89  | 37.02    | 16.50            | 58.06            |
| DFLNHa | G1         | PRE-TERM  | 42                        | 6  | 16.50                    | 103.6 | 63.96 | 40.13  | 72.26    | 27.18            | 98.29            |
| DFLNHa | G1         | PRE-TERM  | 43                        | 10 | 16.50                    | 83.70 | 47.16 | 20.27  | 48.30    | 44.09            | 51.48            |
| DFLNHa | G1         | PRE-TERM  | 44                        | 5  | 16.50                    | 77.74 | 48.86 | 23.18  | 49.76    | 38.65            | 61.64            |
| DFLNHa | G1         | PRE-TERM  | 45                        | 9  | 16.50                    | 61.96 | 27.05 | 16.93  | 16.50    | 16.50            | 39.86            |
| DFLNHa | G1         | PRE-TERM  | 46                        | 6  | 16.50                    | 60.97 | 45.07 | 16.70  | 47.22    | 39.64            | 57.83            |
| DFLNHa | G1         | PRE-TERM  | 47                        | 3  | 16.50                    | 52.20 | 35.51 | 17.96  | 37.84    | 27.17            | 45.02            |
| DFLNHa | G1         | PRE-TERM  | 48                        | 4  | 16.50                    | 51.52 | 32.67 | 18.80  | 31.33    | 16.50            | 47.49            |
| DFLNHa | G1         | TERM      | 38                        | 2  | 130.3                    | 159.2 | 144.7 | 20.46  | 144.7    | 137.5            | 152.0            |
| DFLNHa | G1         | TERM      | 39                        | 9  | 16.50                    | 306.3 | 139.4 | 102.8  | 81.69    | 66.19            | 208.4            |
| DFLNHa | G1         | TERM      | 40                        | 13 | 90.49                    | 399.0 | 183.7 | 89.40  | 153.7    | 131.6            | 219.9            |
| DFLNHa | G1         | TERM      | 41                        | 21 | 89.36                    | 427.0 | 221.3 | 89.35  | 203.4    | 158.2            | 267.7            |
| DFLNHa | G1         | TERM      | 42                        | 21 | 79.80                    | 582.8 | 260.0 | 134.0  | 224.3    | 193.0            | 326.9            |
| DFLNHa | G1         | TERM      | 43                        | 21 | 66.82                    | 473.0 | 225.4 | 132.9  | 190.4    | 123.5            | 342.6            |
| DFLNHa | G1         | TERM      | 44                        | 20 | 34.26                    | 405.6 | 189.9 | 127.1  | 157.5    | 86.28            | 284.4            |
| DFLNHa | G1         | TERM      | 45                        | 21 | 16.50                    | 355.9 | 153.9 | 108.4  | 125.4    | 54.75            | 240.4            |
| DFLNHa | G1         | TERM      | 46                        | 17 | 16.50                    | 293.0 | 122.6 | 81.81  | 115.7    | 68.25            | 190.0            |
| DFLNHa | G1         | TERM      | 47                        | 12 | 16.50                    | 311.2 | 133.8 | 86.07  | 125.0    | 77.98            | 158.5            |
| DFLNHa | G1         | TERM      | 48                        | 6  | 81.61                    | 264.3 | 136.0 | 66.76  | 115.9    | 96.87            | 139.6            |
| DFLNHa | G2         | PRE-TERM  | 29                        | 1  | 16.50                    | 16.50 | 16.50 | NA     | 16.50    | 16.50            | 16.50            |
| DFLNHa | G2         | PRE-TERM  | 30                        | 2  | 16.50                    | 16.50 | 16.50 | 0.0000 | 16.50    | 16.50            | 16.50            |
| DFLNHa | G2         | PRE-TERM  | 31                        | 2  | 16.50                    | 16.50 | 16.50 | 0.0000 | 16.50    | 16.50            | 16.50            |
| DFLNHa | G2         | PRE-TERM  | 32                        | 3  | 16.50                    | 16.50 | 16.50 | 0.0000 | 16.50    | 16.50            | 16.50            |
| DFLNHa | G2         | PRE-TERM  | 33                        | 5  | 16.50                    | 16.50 | 16.50 | 0.0000 | 16.50    | 16.50            | 16.50            |
| DFLNHa | G2         | PRE-TERM  | 34                        | 5  | 16.50                    | 16.50 | 16.50 | 0.0000 | 16.50    | 16.50            | 16.50            |
| DFLNHa | G2         | PRE-TERM  | 35                        | 5  | 16.50                    | 16.50 | 16.50 | 0.0000 | 16.50    | 16.50            | 16.50            |
| DFLNHa | G2         | PRE-TERM  | 36                        | 5  | 16.50                    | 42.44 | 21.69 | 11.60  | 16.50    | 16.50            | 16.50            |
| DFLNHa | G2         | PRE-TERM  | 37                        | 4  | 16.50                    | 42.01 | 22.88 | 12.75  | 16.50    | 16.50            | 22.88            |
| DFLNHa | G2         | PRE-TERM  | 38                        | 4  | 16.50                    | 16.50 | 16.50 | 0.0000 | 16.50    | 16.50            | 16.50            |
| DFLNHa | G2         | PRE-TERM  | 39                        | 3  | 16.50                    | 16.50 | 16.50 | 0.0000 | 16.50    | 16.50            | 16.50            |
| DFLNHa | G2         | PRE-TERM  | 40                        | 3  | 16.50                    | 16.50 | 16.50 | 0.0000 | 16.50    | 16.50            | 16.50            |
| DFLNHa | G2         | PRE-TERM  | 41                        | 2  | 16.50                    | 36.86 | 26.68 | 14.39  | 26.68    | 21.59            | 31.77            |
| DFLNHa | G2         | PRE-TERM  | 42                        | 3  | 16.50                    | 16.50 | 16.50 | 0.0000 | 16.50    | 16.50            | 16.50            |
| DFLNHa | G2         | PRE-TERM  | 43                        | 2  | 16.50                    | 16.50 | 16.50 | 0.0000 | 16.50    | 16.50            | 16.50            |
| DFLNHa | G2         | PRE-TERM  | 44                        | 3  | 16.50                    | 16.50 | 16.50 | 0.0000 | 16.50    | 16.50            | 16.50            |

**Table S4 Concentration of Human Milk Oligosaccharides in Term or Preterm Milk At Specified Postmenstrual Age Separated By Milk Group**

\* When there are results below the method limit of quantification (LoQ) the result has been assigned value of  $0.5 \times \text{LoQ}$ , hence the minimum value appears to be the same in many cases. When a large number of datapoints are below LoQ this can also have the effect that the median = minimum.

| HMO    | Milk Group | Study Arm | Postmenstrual Age (weeks) | N | HMO Concentration (mg/L) |       |       |        |          |                  |                  |
|--------|------------|-----------|---------------------------|---|--------------------------|-------|-------|--------|----------|------------------|------------------|
|        |            |           |                           |   | min *                    | max   | mean  | sd     | median * | Quartile 1 (25%) | Quartile 3 (75%) |
| DFLNHa | G2         | PRE-TERM  | 45                        | 2 | 16.50                    | 139.6 | 78.06 | 87.06  | 78.06    | 47.28            | 108.8            |
| DFLNHa | G2         | PRE-TERM  | 46                        | 2 | 16.50                    | 16.50 | 16.50 | 0.0000 | 16.50    | 16.50            | 16.50            |
| DFLNHa | G2         | PRE-TERM  | 48                        | 1 | 16.50                    | 16.50 | 16.50 | NA     | 16.50    | 16.50            | 16.50            |
| DFLNHa | G2         | TERM      | 39                        | 1 | 16.50                    | 16.50 | 16.50 | NA     | 16.50    | 16.50            | 16.50            |
| DFLNHa | G2         | TERM      | 40                        | 5 | 16.50                    | 16.50 | 16.50 | 0.0000 | 16.50    | 16.50            | 16.50            |
| DFLNHa | G2         | TERM      | 41                        | 4 | 16.50                    | 16.50 | 16.50 | 0.0000 | 16.50    | 16.50            | 16.50            |
| DFLNHa | G2         | TERM      | 42                        | 6 | 16.50                    | 16.50 | 16.50 | 0.0000 | 16.50    | 16.50            | 16.50            |
| DFLNHa | G2         | TERM      | 43                        | 5 | 16.50                    | 16.50 | 16.50 | 0.0000 | 16.50    | 16.50            | 16.50            |
| DFLNHa | G2         | TERM      | 44                        | 5 | 16.50                    | 16.50 | 16.50 | 0.0000 | 16.50    | 16.50            | 16.50            |
| DFLNHa | G2         | TERM      | 45                        | 5 | 16.50                    | 16.50 | 16.50 | 0.0000 | 16.50    | 16.50            | 16.50            |
| DFLNHa | G2         | TERM      | 46                        | 5 | 16.50                    | 16.50 | 16.50 | 0.0000 | 16.50    | 16.50            | 16.50            |
| DFLNHa | G2         | TERM      | 47                        | 4 | 16.50                    | 16.50 | 16.50 | 0.0000 | 16.50    | 16.50            | 16.50            |
| DFLNHa | G3         | PRE-TERM  | 30                        | 1 | 577.3                    | 577.3 | 577.3 | NA     | 577.3    | 577.3            | 577.3            |
| DFLNHa | G3         | PRE-TERM  | 31                        | 1 | 495.2                    | 495.2 | 495.2 | NA     | 495.2    | 495.2            | 495.2            |
| DFLNHa | G3         | PRE-TERM  | 32                        | 1 | 430.4                    | 430.4 | 430.4 | NA     | 430.4    | 430.4            | 430.4            |
| DFLNHa | G3         | PRE-TERM  | 33                        | 1 | 583.6                    | 583.6 | 583.6 | NA     | 583.6    | 583.6            | 583.6            |
| DFLNHa | G3         | PRE-TERM  | 34                        | 1 | 623.8                    | 623.8 | 623.8 | NA     | 623.8    | 623.8            | 623.8            |
| DFLNHa | G3         | PRE-TERM  | 35                        | 1 | 542.4                    | 542.4 | 542.4 | NA     | 542.4    | 542.4            | 542.4            |
| DFLNHa | G3         | PRE-TERM  | 36                        | 1 | 418.7                    | 418.7 | 418.7 | NA     | 418.7    | 418.7            | 418.7            |
| DFLNHa | G3         | PRE-TERM  | 37                        | 1 | 351.9                    | 351.9 | 351.9 | NA     | 351.9    | 351.9            | 351.9            |
| DFLNHa | G3         | PRE-TERM  | 39                        | 1 | 249.7                    | 249.7 | 249.7 | NA     | 249.7    | 249.7            | 249.7            |
| DFLNHa | G3         | PRE-TERM  | 41                        | 1 | 179.2                    | 179.2 | 179.2 | NA     | 179.2    | 179.2            | 179.2            |
| DFLNHa | G3         | PRE-TERM  | 43                        | 1 | 58.00                    | 58.00 | 58.00 | NA     | 58.00    | 58.00            | 58.00            |
| DFLNHa | G3         | PRE-TERM  | 45                        | 1 | 54.78                    | 54.78 | 54.78 | NA     | 54.78    | 54.78            | 54.78            |
| DFLNHa | G3         | TERM      | 41                        | 1 | 488.4                    | 488.4 | 488.4 | NA     | 488.4    | 488.4            | 488.4            |
| DFLNHa | G3         | TERM      | 42                        | 1 | 664.0                    | 664.0 | 664.0 | NA     | 664.0    | 664.0            | 664.0            |
| DFLNHa | G3         | TERM      | 43                        | 1 | 759.1                    | 759.1 | 759.1 | NA     | 759.1    | 759.1            | 759.1            |
| DFLNHa | G3         | TERM      | 44                        | 1 | 709.4                    | 709.4 | 709.4 | NA     | 709.4    | 709.4            | 709.4            |
| DFLNHa | G3         | TERM      | 45                        | 1 | 747.0                    | 747.0 | 747.0 | NA     | 747.0    | 747.0            | 747.0            |
| DFLNHa | G3         | TERM      | 46                        | 1 | 563.0                    | 563.0 | 563.0 | NA     | 563.0    | 563.0            | 563.0            |
| DFLNHa | G3         | TERM      | 47                        | 1 | 525.5                    | 525.5 | 525.5 | NA     | 525.5    | 525.5            | 525.5            |
| DFLNHa | G3         | TERM      | 48                        | 1 | 463.1                    | 463.1 | 463.1 | NA     | 463.1    | 463.1            | 463.1            |
| DFLNHa | G4         | TERM      | 40                        | 1 | 16.50                    | 16.50 | 16.50 | NA     | 16.50    | 16.50            | 16.50            |
| DFLNHa | G4         | TERM      | 41                        | 1 | 52.78                    | 52.78 | 52.78 | NA     | 52.78    | 52.78            | 52.78            |
| DFLNHa | G4         | TERM      | 42                        | 1 | 16.50                    | 16.50 | 16.50 | NA     | 16.50    | 16.50            | 16.50            |
| DFLNHa | G4         | TERM      | 43                        | 1 | 16.50                    | 16.50 | 16.50 | NA     | 16.50    | 16.50            | 16.50            |

**Table S4 Concentration of Human Milk Oligosaccharides in Term or Preterm Milk At Specified Postmenstrual Age Separated By Milk Group**

\* When there are results below the method limit of quantification (LoQ) the result has been assigned value of  $0.5 \times \text{LoQ}$ , hence the minimum value appears to be the same in many cases. When a large number of datapoints are below LoQ this can also have the effect that the median = minimum.

| HMO    | Milk Group | Study Arm | Postmenstrual Age (weeks) | N  | HMO Concentration (mg/L) |       |       |       |          |                  |                  |
|--------|------------|-----------|---------------------------|----|--------------------------|-------|-------|-------|----------|------------------|------------------|
|        |            |           |                           |    | min *                    | max   | mean  | sd    | median * | Quartile 1 (25%) | Quartile 3 (75%) |
| DFLNHa | G4         | TERM      | 44                        | 1  | 16.50                    | 16.50 | 16.50 | NA    | 16.50    | 16.50            | 16.50            |
| DFLNHa | G4         | TERM      | 45                        | 1  | 16.50                    | 16.50 | 16.50 | NA    | 16.50    | 16.50            | 16.50            |
| DFLNHa | G4         | TERM      | 46                        | 1  | 16.50                    | 16.50 | 16.50 | NA    | 16.50    | 16.50            | 16.50            |
| DFLNHa | G4         | TERM      | 47                        | 1  | 16.50                    | 16.50 | 16.50 | NA    | 16.50    | 16.50            | 16.50            |
| DSLNT  | G1         | PRE-TERM  | 30                        | 7  | 17.50                    | 454.1 | 301.8 | 143.2 | 327.6    | 266.6            | 390.0            |
| DSLNT  | G1         | PRE-TERM  | 31                        | 9  | 17.50                    | 534.4 | 335.1 | 186.9 | 397.1    | 357.5            | 437.9            |
| DSLNT  | G1         | PRE-TERM  | 32                        | 13 | 193.6                    | 605.8 | 365.8 | 117.9 | 345.9    | 282.9            | 443.0            |
| DSLNT  | G1         | PRE-TERM  | 33                        | 18 | 197.2                    | 703.2 | 394.7 | 150.7 | 328.5    | 297.5            | 508.9            |
| DSLNT  | G1         | PRE-TERM  | 34                        | 19 | 169.1                    | 822.5 | 416.9 | 198.5 | 381.5    | 253.5            | 554.3            |
| DSLNT  | G1         | PRE-TERM  | 35                        | 18 | 128.4                    | 908.0 | 418.2 | 238.9 | 315.3    | 261.5            | 561.8            |
| DSLNT  | G1         | PRE-TERM  | 36                        | 19 | 129.9                    | 796.0 | 326.0 | 181.1 | 223.8    | 205.5            | 400.4            |
| DSLNT  | G1         | PRE-TERM  | 37                        | 18 | 105.5                    | 725.2 | 295.8 | 166.5 | 265.2    | 181.9            | 349.2            |
| DSLNT  | G1         | PRE-TERM  | 38                        | 11 | 100.2                    | 628.2 | 272.8 | 165.2 | 212.8    | 160.6            | 328.5            |
| DSLNT  | G1         | PRE-TERM  | 39                        | 16 | 97.12                    | 597.5 | 270.0 | 156.8 | 201.0    | 174.3            | 321.6            |
| DSLNT  | G1         | PRE-TERM  | 40                        | 7  | 105.8                    | 530.6 | 349.6 | 154.3 | 340.1    | 262.3            | 472.9            |
| DSLNT  | G1         | PRE-TERM  | 41                        | 12 | 84.32                    | 413.6 | 208.5 | 85.67 | 188.7    | 169.5            | 246.9            |
| DSLNT  | G1         | PRE-TERM  | 42                        | 6  | 72.56                    | 422.5 | 264.4 | 126.4 | 292.2    | 192.1            | 334.5            |
| DSLNT  | G1         | PRE-TERM  | 43                        | 10 | 132.9                    | 435.1 | 215.3 | 88.80 | 186.4    | 158.7            | 240.2            |
| DSLNT  | G1         | PRE-TERM  | 44                        | 5  | 102.0                    | 318.0 | 225.7 | 82.93 | 240.7    | 193.2            | 274.7            |
| DSLNT  | G1         | PRE-TERM  | 45                        | 9  | 121.3                    | 253.6 | 177.6 | 44.11 | 170.0    | 145.6            | 205.6            |
| DSLNT  | G1         | PRE-TERM  | 46                        | 6  | 88.23                    | 311.8 | 204.7 | 88.33 | 218.0    | 136.8            | 266.3            |
| DSLNT  | G1         | PRE-TERM  | 47                        | 3  | 103.0                    | 158.2 | 133.9 | 28.20 | 140.5    | 121.8            | 149.4            |
| DSLNT  | G1         | PRE-TERM  | 48                        | 4  | 124.7                    | 219.3 | 175.7 | 39.05 | 179.4    | 162.1            | 193.0            |
| DSLNT  | G1         | TERM      | 38                        | 2  | 412.7                    | 433.7 | 423.2 | 14.79 | 423.2    | 418.0            | 428.4            |
| DSLNT  | G1         | TERM      | 39                        | 9  | 248.3                    | 489.2 | 369.9 | 75.78 | 366.5    | 337.5            | 408.4            |
| DSLNT  | G1         | TERM      | 40                        | 13 | 203.7                    | 649.5 | 383.0 | 130.4 | 348.3    | 266.1            | 468.7            |
| DSLNT  | G1         | TERM      | 41                        | 21 | 212.2                    | 880.1 | 373.3 | 138.2 | 374.1    | 286.2            | 401.3            |
| DSLNT  | G1         | TERM      | 42                        | 21 | 17.50                    | 836.5 | 343.5 | 162.5 | 353.3    | 249.9            | 406.8            |
| DSLNT  | G1         | TERM      | 43                        | 21 | 117.1                    | 630.2 | 303.3 | 115.3 | 293.3    | 223.6            | 342.1            |
| DSLNT  | G1         | TERM      | 44                        | 20 | 94.18                    | 555.7 | 253.8 | 108.2 | 237.0    | 173.9            | 313.2            |
| DSLNT  | G1         | TERM      | 45                        | 21 | 75.20                    | 426.1 | 225.7 | 84.09 | 202.7    | 163.1            | 286.9            |
| DSLNT  | G1         | TERM      | 46                        | 17 | 69.19                    | 437.5 | 208.4 | 94.82 | 181.6    | 129.7            | 256.8            |
| DSLNT  | G1         | TERM      | 47                        | 12 | 48.04                    | 422.7 | 195.2 | 103.0 | 183.4    | 133.7            | 262.7            |
| DSLNT  | G1         | TERM      | 48                        | 6  | 60.14                    | 223.1 | 149.5 | 68.91 | 156.0    | 97.78            | 206.4            |
| DSLNT  | G2         | PRE-TERM  | 29                        | 1  | 946.4                    | 946.4 | 946.4 | NA    | 946.4    | 946.4            | 946.4            |
| DSLNT  | G2         | PRE-TERM  | 30                        | 2  | 340.2                    | 843.2 | 591.7 | 355.7 | 591.7    | 465.9            | 717.4            |

**Table S4 Concentration of Human Milk Oligosaccharides in Term or Preterm Milk At Specified Postmenstrual Age Separated By Milk Group**

\* When there are results below the method limit of quantification (LoQ) the result has been assigned value of  $0.5 \times \text{LoQ}$ , hence the minimum value appears to be the same in many cases. When a large number of datapoints are below LoQ this can also have the effect that the median = minimum.

| HMO   | Milk Group | Study Arm | Postmenstrual Age (weeks) | N | HMO Concentration (mg/L) |       |       |       |          |                  |                  |
|-------|------------|-----------|---------------------------|---|--------------------------|-------|-------|-------|----------|------------------|------------------|
|       |            |           |                           |   | min *                    | max   | mean  | sd    | median * | Quartile 1 (25%) | Quartile 3 (75%) |
| DSLNT | G2         | PRE-TERM  | 31                        | 2 | 486.4                    | 786.4 | 636.4 | 212.1 | 636.4    | 561.4            | 711.4            |
| DSLNT | G2         | PRE-TERM  | 32                        | 3 | 511.9                    | 719.0 | 595.4 | 109.2 | 555.3    | 533.6            | 637.1            |
| DSLNT | G2         | PRE-TERM  | 33                        | 5 | 443.0                    | 843.4 | 647.1 | 147.5 | 661.2    | 586.5            | 701.2            |
| DSLNT | G2         | PRE-TERM  | 34                        | 5 | 344.4                    | 590.1 | 502.3 | 100.9 | 557.9    | 460.2            | 559.2            |
| DSLNT | G2         | PRE-TERM  | 35                        | 5 | 312.6                    | 579.5 | 470.2 | 102.4 | 503.0    | 433.2            | 522.6            |
| DSLNT | G2         | PRE-TERM  | 36                        | 5 | 249.6                    | 677.8 | 456.7 | 164.7 | 420.6    | 380.6            | 554.9            |
| DSLNT | G2         | PRE-TERM  | 37                        | 4 | 364.8                    | 411.8 | 390.4 | 20.70 | 392.6    | 378.8            | 404.2            |
| DSLNT | G2         | PRE-TERM  | 38                        | 4 | 182.5                    | 430.6 | 325.1 | 109.5 | 343.6    | 270.6            | 398.1            |
| DSLNT | G2         | PRE-TERM  | 39                        | 3 | 226.1                    | 364.4 | 285.1 | 71.36 | 264.8    | 245.4            | 314.6            |
| DSLNT | G2         | PRE-TERM  | 40                        | 3 | 160.9                    | 277.2 | 232.6 | 62.67 | 259.6    | 210.3            | 268.4            |
| DSLNT | G2         | PRE-TERM  | 41                        | 2 | 232.1                    | 452.7 | 342.4 | 156.0 | 342.4    | 287.3            | 397.6            |
| DSLNT | G2         | PRE-TERM  | 42                        | 3 | 144.4                    | 256.3 | 186.5 | 60.84 | 158.8    | 151.6            | 207.5            |
| DSLNT | G2         | PRE-TERM  | 43                        | 2 | 131.9                    | 321.5 | 226.7 | 134.1 | 226.7    | 179.3            | 274.1            |
| DSLNT | G2         | PRE-TERM  | 44                        | 3 | 118.9                    | 239.5 | 165.1 | 65.03 | 136.9    | 127.9            | 188.2            |
| DSLNT | G2         | PRE-TERM  | 45                        | 2 | 131.9                    | 459.9 | 295.9 | 231.9 | 295.9    | 213.9            | 377.9            |
| DSLNT | G2         | PRE-TERM  | 46                        | 2 | 176.5                    | 230.5 | 203.5 | 38.18 | 203.5    | 190.0            | 217.0            |
| DSLNT | G2         | PRE-TERM  | 48                        | 1 | 212.0                    | 212.0 | 212.0 | NA    | 212.0    | 212.0            | 212.0            |
| DSLNT | G2         | TERM      | 39                        | 1 | 262.5                    | 262.5 | 262.5 | NA    | 262.5    | 262.5            | 262.5            |
| DSLNT | G2         | TERM      | 40                        | 5 | 146.3                    | 540.0 | 344.8 | 151.9 | 304.3    | 288.7            | 444.5            |
| DSLNT | G2         | TERM      | 41                        | 4 | 135.3                    | 490.1 | 325.0 | 145.8 | 337.2    | 278.8            | 383.4            |
| DSLNT | G2         | TERM      | 42                        | 6 | 129.5                    | 480.2 | 290.2 | 115.6 | 270.2    | 254.6            | 323.6            |
| DSLNT | G2         | TERM      | 43                        | 5 | 105.1                    | 332.1 | 232.7 | 97.88 | 224.7    | 175.1            | 326.4            |
| DSLNT | G2         | TERM      | 44                        | 5 | 90.80                    | 318.1 | 209.4 | 102.7 | 161.6    | 159.5            | 316.9            |
| DSLNT | G2         | TERM      | 45                        | 5 | 48.35                    | 312.0 | 177.5 | 124.1 | 150.1    | 74.88            | 302.1            |
| DSLNT | G2         | TERM      | 46                        | 5 | 77.83                    | 203.7 | 132.7 | 52.39 | 127.3    | 89.74            | 165.1            |
| DSLNT | G2         | TERM      | 47                        | 4 | 69.77                    | 224.3 | 148.5 | 69.14 | 149.9    | 103.9            | 194.5            |
| DSLNT | G3         | PRE-TERM  | 30                        | 1 | 259.3                    | 259.3 | 259.3 | NA    | 259.3    | 259.3            | 259.3            |
| DSLNT | G3         | PRE-TERM  | 31                        | 1 | 495.6                    | 495.6 | 495.6 | NA    | 495.6    | 495.6            | 495.6            |
| DSLNT | G3         | PRE-TERM  | 32                        | 1 | 470.6                    | 470.6 | 470.6 | NA    | 470.6    | 470.6            | 470.6            |
| DSLNT | G3         | PRE-TERM  | 33                        | 1 | 304.9                    | 304.9 | 304.9 | NA    | 304.9    | 304.9            | 304.9            |
| DSLNT | G3         | PRE-TERM  | 34                        | 1 | 244.0                    | 244.0 | 244.0 | NA    | 244.0    | 244.0            | 244.0            |
| DSLNT | G3         | PRE-TERM  | 35                        | 1 | 196.7                    | 196.7 | 196.7 | NA    | 196.7    | 196.7            | 196.7            |
| DSLNT | G3         | PRE-TERM  | 36                        | 1 | 159.2                    | 159.2 | 159.2 | NA    | 159.2    | 159.2            | 159.2            |
| DSLNT | G3         | PRE-TERM  | 37                        | 1 | 129.6                    | 129.6 | 129.6 | NA    | 129.6    | 129.6            | 129.6            |
| DSLNT | G3         | PRE-TERM  | 39                        | 1 | 102.6                    | 102.6 | 102.6 | NA    | 102.6    | 102.6            | 102.6            |
| DSLNT | G3         | PRE-TERM  | 41                        | 1 | 96.95                    | 96.95 | 96.95 | NA    | 96.95    | 96.95            | 96.95            |

**Table S4 Concentration of Human Milk Oligosaccharides in Term or Preterm Milk At Specified Postmenstrual Age Separated By Milk Group**

\* When there are results below the method limit of quantification (LoQ) the result has been assigned value of  $0.5 \times \text{LoQ}$ , hence the minimum value appears to be the same in many cases. When a large number of datapoints are below LoQ this can also have the effect that the median = minimum.

| HMO   | Milk Group | Study Arm | Postmenstrual Age (weeks) | N  | HMO Concentration (mg/L) |       |       |       |          |                  |                  |
|-------|------------|-----------|---------------------------|----|--------------------------|-------|-------|-------|----------|------------------|------------------|
|       |            |           |                           |    | min *                    | max   | mean  | sd    | median * | Quartile 1 (25%) | Quartile 3 (75%) |
| DSLNT | G3         | PRE-TERM  | 43                        | 1  | 97.17                    | 97.17 | 97.17 | NA    | 97.17    | 97.17            | 97.17            |
| DSLNT | G3         | PRE-TERM  | 45                        | 1  | 97.08                    | 97.08 | 97.08 | NA    | 97.08    | 97.08            | 97.08            |
| DSLNT | G3         | TERM      | 41                        | 1  | 163.6                    | 163.6 | 163.6 | NA    | 163.6    | 163.6            | 163.6            |
| DSLNT | G3         | TERM      | 42                        | 1  | 190.7                    | 190.7 | 190.7 | NA    | 190.7    | 190.7            | 190.7            |
| DSLNT | G3         | TERM      | 43                        | 1  | 218.6                    | 218.6 | 218.6 | NA    | 218.6    | 218.6            | 218.6            |
| DSLNT | G3         | TERM      | 44                        | 1  | 199.4                    | 199.4 | 199.4 | NA    | 199.4    | 199.4            | 199.4            |
| DSLNT | G3         | TERM      | 45                        | 1  | 171.3                    | 171.3 | 171.3 | NA    | 171.3    | 171.3            | 171.3            |
| DSLNT | G3         | TERM      | 46                        | 1  | 156.0                    | 156.0 | 156.0 | NA    | 156.0    | 156.0            | 156.0            |
| DSLNT | G3         | TERM      | 47                        | 1  | 129.3                    | 129.3 | 129.3 | NA    | 129.3    | 129.3            | 129.3            |
| DSLNT | G3         | TERM      | 48                        | 1  | 140.2                    | 140.2 | 140.2 | NA    | 140.2    | 140.2            | 140.2            |
| DSLNT | G4         | TERM      | 40                        | 1  | 697.9                    | 697.9 | 697.9 | NA    | 697.9    | 697.9            | 697.9            |
| DSLNT | G4         | TERM      | 41                        | 1  | 608.1                    | 608.1 | 608.1 | NA    | 608.1    | 608.1            | 608.1            |
| DSLNT | G4         | TERM      | 42                        | 1  | 488.2                    | 488.2 | 488.2 | NA    | 488.2    | 488.2            | 488.2            |
| DSLNT | G4         | TERM      | 43                        | 1  | 477.6                    | 477.6 | 477.6 | NA    | 477.6    | 477.6            | 477.6            |
| DSLNT | G4         | TERM      | 44                        | 1  | 360.7                    | 360.7 | 360.7 | NA    | 360.7    | 360.7            | 360.7            |
| DSLNT | G4         | TERM      | 45                        | 1  | 401.1                    | 401.1 | 401.1 | NA    | 401.1    | 401.1            | 401.1            |
| DSLNT | G4         | TERM      | 46                        | 1  | 293.1                    | 293.1 | 293.1 | NA    | 293.1    | 293.1            | 293.1            |
| DSLNT | G4         | TERM      | 47                        | 1  | 264.6                    | 264.6 | 264.6 | NA    | 264.6    | 264.6            | 264.6            |
| LDFT  | G1         | PRE-TERM  | 30                        | 7  | 22.50                    | 546.1 | 354.1 | 209.6 | 456.4    | 200.6            | 526.2            |
| LDFT  | G1         | PRE-TERM  | 31                        | 9  | 22.50                    | 759.0 | 278.0 | 244.4 | 162.6    | 145.7            | 434.6            |
| LDFT  | G1         | PRE-TERM  | 32                        | 13 | 22.50                    | 1243  | 324.1 | 325.6 | 223.4    | 146.1            | 321.0            |
| LDFT  | G1         | PRE-TERM  | 33                        | 18 | 22.50                    | 864.6 | 305.7 | 244.0 | 230.9    | 158.0            | 423.5            |
| LDFT  | G1         | PRE-TERM  | 34                        | 19 | 22.50                    | 2513  | 383.0 | 571.8 | 234.9    | 120.3            | 326.5            |
| LDFT  | G1         | PRE-TERM  | 35                        | 18 | 22.50                    | 1926  | 367.2 | 417.7 | 231.6    | 186.8            | 364.8            |
| LDFT  | G1         | PRE-TERM  | 36                        | 19 | 22.50                    | 604.5 | 230.3 | 139.3 | 212.7    | 142.9            | 296.8            |
| LDFT  | G1         | PRE-TERM  | 37                        | 18 | 22.50                    | 910.9 | 286.2 | 197.8 | 249.6    | 171.5            | 336.4            |
| LDFT  | G1         | PRE-TERM  | 38                        | 11 | 176.6                    | 2333  | 609.8 | 621.1 | 427.8    | 261.0            | 623.9            |
| LDFT  | G1         | PRE-TERM  | 39                        | 16 | 22.50                    | 813.5 | 324.4 | 239.0 | 238.5    | 181.5            | 443.4            |
| LDFT  | G1         | PRE-TERM  | 40                        | 7  | 123.7                    | 2758  | 656.1 | 938.6 | 323.3    | 206.8            | 487.3            |
| LDFT  | G1         | PRE-TERM  | 41                        | 12 | 22.50                    | 3003  | 896.7 | 935.4 | 469.3    | 313.7            | 1347             |
| LDFT  | G1         | PRE-TERM  | 42                        | 6  | 142.7                    | 677.0 | 304.3 | 193.3 | 227.6    | 213.7            | 313.3            |
| LDFT  | G1         | PRE-TERM  | 43                        | 10 | 22.50                    | 1827  | 589.5 | 658.9 | 367.9    | 225.3            | 479.3            |
| LDFT  | G1         | PRE-TERM  | 44                        | 5  | 105.5                    | 574.3 | 333.0 | 176.1 | 366.3    | 232.7            | 386.2            |
| LDFT  | G1         | PRE-TERM  | 45                        | 9  | 22.50                    | 1825  | 557.6 | 588.2 | 333.4    | 254.3            | 574.9            |
| LDFT  | G1         | PRE-TERM  | 46                        | 6  | 231.6                    | 791.9 | 377.3 | 213.2 | 284.5    | 260.3            | 385.4            |
| LDFT  | G1         | PRE-TERM  | 47                        | 3  | 142.6                    | 499.2 | 327.3 | 178.6 | 340.0    | 241.3            | 419.6            |

**Table S4 Concentration of Human Milk Oligosaccharides in Term or Preterm Milk At Specified Postmenstrual Age Separated By Milk Group**

\* When there are results below the method limit of quantification (LoQ) the result has been assigned value of  $0.5 \times \text{LoQ}$ , hence the minimum value appears to be the same in many cases. When a large number of datapoints are below LoQ this can also have the effect that the median = minimum.

| HMO  | Milk Group | Study Arm | Postmenstrual Age (weeks) | N  | HMO Concentration (mg/L) |       |       |        |          |                  |                  |
|------|------------|-----------|---------------------------|----|--------------------------|-------|-------|--------|----------|------------------|------------------|
|      |            |           |                           |    | min *                    | max   | mean  | sd     | median * | Quartile 1 (25%) | Quartile 3 (75%) |
| LDFT | G1         | PRE-TERM  | 48                        | 4  | 150.8                    | 516.9 | 350.0 | 164.6  | 366.3    | 251.3            | 465.0            |
| LDFT | G1         | TERM      | 38                        | 2  | 390.4                    | 617.8 | 504.1 | 160.8  | 504.1    | 447.3            | 561.0            |
| LDFT | G1         | TERM      | 39                        | 9  | 111.8                    | 983.9 | 543.3 | 297.4  | 521.9    | 287.5            | 774.1            |
| LDFT | G1         | TERM      | 40                        | 13 | 76.98                    | 810.2 | 427.1 | 219.6  | 403.0    | 325.0            | 499.6            |
| LDFT | G1         | TERM      | 41                        | 21 | 89.15                    | 965.0 | 309.5 | 179.2  | 318.3    | 222.1            | 347.9            |
| LDFT | G1         | TERM      | 42                        | 21 | 109.1                    | 549.3 | 253.0 | 103.3  | 238.7    | 205.1            | 315.4            |
| LDFT | G1         | TERM      | 43                        | 21 | 130.3                    | 1270  | 321.0 | 280.1  | 210.4    | 189.5            | 302.0            |
| LDFT | G1         | TERM      | 44                        | 20 | 105.9                    | 2907  | 374.0 | 602.2  | 260.7    | 182.1            | 321.8            |
| LDFT | G1         | TERM      | 45                        | 21 | 126.0                    | 1713  | 362.0 | 368.6  | 250.2    | 189.9            | 305.4            |
| LDFT | G1         | TERM      | 46                        | 17 | 118.3                    | 566.9 | 295.9 | 123.0  | 322.8    | 203.2            | 341.6            |
| LDFT | G1         | TERM      | 47                        | 12 | 93.06                    | 429.7 | 282.2 | 104.0  | 293.3    | 216.6            | 352.0            |
| LDFT | G1         | TERM      | 48                        | 6  | 174.4                    | 818.6 | 423.8 | 230.1  | 357.7    | 295.0            | 509.7            |
| LDFT | G2         | PRE-TERM  | 29                        | 1  | 22.50                    | 22.50 | 22.50 | NA     | 22.50    | 22.50            | 22.50            |
| LDFT | G2         | PRE-TERM  | 30                        | 2  | 22.50                    | 22.50 | 22.50 | 0.0000 | 22.50    | 22.50            | 22.50            |
| LDFT | G2         | PRE-TERM  | 31                        | 2  | 22.50                    | 22.50 | 22.50 | 0.0000 | 22.50    | 22.50            | 22.50            |
| LDFT | G2         | PRE-TERM  | 32                        | 3  | 22.50                    | 22.50 | 22.50 | 0.0000 | 22.50    | 22.50            | 22.50            |
| LDFT | G2         | PRE-TERM  | 33                        | 5  | 22.50                    | 22.50 | 22.50 | 0.0000 | 22.50    | 22.50            | 22.50            |
| LDFT | G2         | PRE-TERM  | 34                        | 5  | 22.50                    | 22.50 | 22.50 | 0.0000 | 22.50    | 22.50            | 22.50            |
| LDFT | G2         | PRE-TERM  | 35                        | 5  | 22.50                    | 22.50 | 22.50 | 0.0000 | 22.50    | 22.50            | 22.50            |
| LDFT | G2         | PRE-TERM  | 36                        | 5  | 22.50                    | 22.50 | 22.50 | 0.0000 | 22.50    | 22.50            | 22.50            |
| LDFT | G2         | PRE-TERM  | 37                        | 4  | 22.50                    | 22.50 | 22.50 | 0.0000 | 22.50    | 22.50            | 22.50            |
| LDFT | G2         | PRE-TERM  | 38                        | 4  | 22.50                    | 22.50 | 22.50 | 0.0000 | 22.50    | 22.50            | 22.50            |
| LDFT | G2         | PRE-TERM  | 39                        | 3  | 22.50                    | 22.50 | 22.50 | 0.0000 | 22.50    | 22.50            | 22.50            |
| LDFT | G2         | PRE-TERM  | 40                        | 3  | 22.50                    | 22.50 | 22.50 | 0.0000 | 22.50    | 22.50            | 22.50            |
| LDFT | G2         | PRE-TERM  | 41                        | 2  | 22.50                    | 22.50 | 22.50 | 0.0000 | 22.50    | 22.50            | 22.50            |
| LDFT | G2         | PRE-TERM  | 42                        | 3  | 22.50                    | 22.50 | 22.50 | 0.0000 | 22.50    | 22.50            | 22.50            |
| LDFT | G2         | PRE-TERM  | 43                        | 2  | 22.50                    | 22.50 | 22.50 | 0.0000 | 22.50    | 22.50            | 22.50            |
| LDFT | G2         | PRE-TERM  | 44                        | 3  | 22.50                    | 22.50 | 22.50 | 0.0000 | 22.50    | 22.50            | 22.50            |
| LDFT | G2         | PRE-TERM  | 45                        | 2  | 22.50                    | 22.50 | 22.50 | 0.0000 | 22.50    | 22.50            | 22.50            |
| LDFT | G2         | PRE-TERM  | 46                        | 2  | 22.50                    | 22.50 | 22.50 | 0.0000 | 22.50    | 22.50            | 22.50            |
| LDFT | G2         | PRE-TERM  | 48                        | 1  | 22.50                    | 22.50 | 22.50 | NA     | 22.50    | 22.50            | 22.50            |
| LDFT | G2         | TERM      | 39                        | 1  | 22.50                    | 22.50 | 22.50 | NA     | 22.50    | 22.50            | 22.50            |
| LDFT | G2         | TERM      | 40                        | 5  | 22.50                    | 22.50 | 22.50 | 0.0000 | 22.50    | 22.50            | 22.50            |
| LDFT | G2         | TERM      | 41                        | 4  | 22.50                    | 22.50 | 22.50 | 0.0000 | 22.50    | 22.50            | 22.50            |
| LDFT | G2         | TERM      | 42                        | 6  | 22.50                    | 22.50 | 22.50 | 0.0000 | 22.50    | 22.50            | 22.50            |
| LDFT | G2         | TERM      | 43                        | 5  | 22.50                    | 22.50 | 22.50 | 0.0000 | 22.50    | 22.50            | 22.50            |

**Table S4 Concentration of Human Milk Oligosaccharides in Term or Preterm Milk At Specified Postmenstrual Age Separated By Milk Group**

\* When there are results below the method limit of quantification (LoQ) the result has been assigned value of  $0.5 \times \text{LoQ}$ , hence the minimum value appears to be the same in many cases. When a large number of datapoints are below LoQ this can also have the effect that the median = minimum.

| HMO     | Milk Group | Study Arm | Postmenstrual Age (weeks) | N  | HMO Concentration (mg/L) |       |       |        |          |                  |                  |
|---------|------------|-----------|---------------------------|----|--------------------------|-------|-------|--------|----------|------------------|------------------|
|         |            |           |                           |    | min *                    | max   | mean  | sd     | median * | Quartile 1 (25%) | Quartile 3 (75%) |
| LDFT    | G2         | TERM      | 44                        | 5  | 22.50                    | 22.50 | 22.50 | 0.0000 | 22.50    | 22.50            | 22.50            |
| LDFT    | G2         | TERM      | 45                        | 5  | 22.50                    | 22.50 | 22.50 | 0.0000 | 22.50    | 22.50            | 22.50            |
| LDFT    | G2         | TERM      | 46                        | 5  | 22.50                    | 22.50 | 22.50 | 0.0000 | 22.50    | 22.50            | 22.50            |
| LDFT    | G2         | TERM      | 47                        | 4  | 22.50                    | 22.50 | 22.50 | 0.0000 | 22.50    | 22.50            | 22.50            |
| LDFT    | G3         | PRE-TERM  | 30                        | 1  | 56.66                    | 56.66 | 56.66 | NA     | 56.66    | 56.66            | 56.66            |
| LDFT    | G3         | PRE-TERM  | 31                        | 1  | 265.3                    | 265.3 | 265.3 | NA     | 265.3    | 265.3            | 265.3            |
| LDFT    | G3         | PRE-TERM  | 32                        | 1  | 135.2                    | 135.2 | 135.2 | NA     | 135.2    | 135.2            | 135.2            |
| LDFT    | G3         | PRE-TERM  | 33                        | 1  | 63.09                    | 63.09 | 63.09 | NA     | 63.09    | 63.09            | 63.09            |
| LDFT    | G3         | PRE-TERM  | 34                        | 1  | 91.93                    | 91.93 | 91.93 | NA     | 91.93    | 91.93            | 91.93            |
| LDFT    | G3         | PRE-TERM  | 35                        | 1  | 95.15                    | 95.15 | 95.15 | NA     | 95.15    | 95.15            | 95.15            |
| LDFT    | G3         | PRE-TERM  | 36                        | 1  | 77.50                    | 77.50 | 77.50 | NA     | 77.50    | 77.50            | 77.50            |
| LDFT    | G3         | PRE-TERM  | 37                        | 1  | 77.28                    | 77.28 | 77.28 | NA     | 77.28    | 77.28            | 77.28            |
| LDFT    | G3         | PRE-TERM  | 39                        | 1  | 76.44                    | 76.44 | 76.44 | NA     | 76.44    | 76.44            | 76.44            |
| LDFT    | G3         | PRE-TERM  | 41                        | 1  | 76.41                    | 76.41 | 76.41 | NA     | 76.41    | 76.41            | 76.41            |
| LDFT    | G3         | PRE-TERM  | 43                        | 1  | 91.69                    | 91.69 | 91.69 | NA     | 91.69    | 91.69            | 91.69            |
| LDFT    | G3         | PRE-TERM  | 45                        | 1  | 103.7                    | 103.7 | 103.7 | NA     | 103.7    | 103.7            | 103.7            |
| LDFT    | G3         | TERM      | 41                        | 1  | 71.16                    | 71.16 | 71.16 | NA     | 71.16    | 71.16            | 71.16            |
| LDFT    | G3         | TERM      | 42                        | 1  | 273.5                    | 273.5 | 273.5 | NA     | 273.5    | 273.5            | 273.5            |
| LDFT    | G3         | TERM      | 43                        | 1  | 136.6                    | 136.6 | 136.6 | NA     | 136.6    | 136.6            | 136.6            |
| LDFT    | G3         | TERM      | 44                        | 1  | 119.3                    | 119.3 | 119.3 | NA     | 119.3    | 119.3            | 119.3            |
| LDFT    | G3         | TERM      | 45                        | 1  | 61.93                    | 61.93 | 61.93 | NA     | 61.93    | 61.93            | 61.93            |
| LDFT    | G3         | TERM      | 46                        | 1  | 111.5                    | 111.5 | 111.5 | NA     | 111.5    | 111.5            | 111.5            |
| LDFT    | G3         | TERM      | 47                        | 1  | 68.95                    | 68.95 | 68.95 | NA     | 68.95    | 68.95            | 68.95            |
| LDFT    | G3         | TERM      | 48                        | 1  | 143.8                    | 143.8 | 143.8 | NA     | 143.8    | 143.8            | 143.8            |
| LDFT    | G4         | TERM      | 40                        | 1  | 22.50                    | 22.50 | 22.50 | NA     | 22.50    | 22.50            | 22.50            |
| LDFT    | G4         | TERM      | 41                        | 1  | 22.50                    | 22.50 | 22.50 | NA     | 22.50    | 22.50            | 22.50            |
| LDFT    | G4         | TERM      | 42                        | 1  | 22.50                    | 22.50 | 22.50 | NA     | 22.50    | 22.50            | 22.50            |
| LDFT    | G4         | TERM      | 43                        | 1  | 22.50                    | 22.50 | 22.50 | NA     | 22.50    | 22.50            | 22.50            |
| LDFT    | G4         | TERM      | 44                        | 1  | 22.50                    | 22.50 | 22.50 | NA     | 22.50    | 22.50            | 22.50            |
| LDFT    | G4         | TERM      | 45                        | 1  | 22.50                    | 22.50 | 22.50 | NA     | 22.50    | 22.50            | 22.50            |
| LDFT    | G4         | TERM      | 46                        | 1  | 22.50                    | 22.50 | 22.50 | NA     | 22.50    | 22.50            | 22.50            |
| LDFT    | G4         | TERM      | 47                        | 1  | 22.50                    | 22.50 | 22.50 | NA     | 22.50    | 22.50            | 22.50            |
| LNDFH-I | G1         | PRE-TERM  | 30                        | 7  | 81.36                    | 1679  | 1048  | 511.6  | 1039     | 963.9            | 1303             |
| LNDFH-I | G1         | PRE-TERM  | 31                        | 9  | 75.44                    | 1761  | 1031  | 509.3  | 951.6    | 780.5            | 1263             |
| LNDFH-I | G1         | PRE-TERM  | 32                        | 13 | 49.54                    | 1781  | 1110  | 504.0  | 1145     | 767.7            | 1520             |
| LNDFH-I | G1         | PRE-TERM  | 33                        | 18 | 40.53                    | 1860  | 1165  | 462.0  | 1186     | 888.5            | 1529             |



**Table S4 Concentration of Human Milk Oligosaccharides in Term or Preterm Milk At Specified Postmenstrual Age Separated By Milk Group**

\* When there are results below the method limit of quantification (LoQ) the result has been assigned value of  $0.5 \times \text{LoQ}$ , hence the minimum value appears to be the same in many cases. When a large number of datapoints are below LoQ this can also have the effect that the median = minimum.

| HMO     | Milk Group | Study Arm | Postmenstrual Age (weeks) | N  | HMO Concentration (mg/L) |       |       |        |          |                  |                  |
|---------|------------|-----------|---------------------------|----|--------------------------|-------|-------|--------|----------|------------------|------------------|
|         |            |           |                           |    | min *                    | max   | mean  | sd     | median * | Quartile 1 (25%) | Quartile 3 (75%) |
| LNDFH-I | G1         | PRE-TERM  | 34                        | 19 | 41.75                    | 3123  | 1196  | 640.2  | 1145     | 831.0            | 1487             |
| LNDFH-I | G1         | PRE-TERM  | 35                        | 18 | 39.25                    | 2269  | 1158  | 464.1  | 1143     | 947.1            | 1427             |
| LNDFH-I | G1         | PRE-TERM  | 36                        | 19 | 36.61                    | 1707  | 1028  | 402.3  | 1022     | 844.3            | 1275             |
| LNDFH-I | G1         | PRE-TERM  | 37                        | 18 | 31.86                    | 1585  | 991.3 | 366.6  | 1031     | 840.8            | 1187             |
| LNDFH-I | G1         | PRE-TERM  | 38                        | 11 | 563.5                    | 1910  | 1100  | 434.2  | 859.0    | 821.8            | 1475             |
| LNDFH-I | G1         | PRE-TERM  | 39                        | 16 | 22.31                    | 1661  | 977.8 | 373.2  | 969.1    | 783.0            | 1126             |
| LNDFH-I | G1         | PRE-TERM  | 40                        | 7  | 753.6                    | 1575  | 1141  | 348.1  | 1170     | 839.2            | 1404             |
| LNDFH-I | G1         | PRE-TERM  | 41                        | 12 | 18.66                    | 1551  | 1033  | 412.1  | 1066     | 867.2            | 1374             |
| LNDFH-I | G1         | PRE-TERM  | 42                        | 6  | 608.0                    | 1606  | 998.3 | 392.3  | 957.9    | 666.5            | 1207             |
| LNDFH-I | G1         | PRE-TERM  | 43                        | 10 | 33.59                    | 1768  | 1045  | 527.4  | 1020     | 735.7            | 1467             |
| LNDFH-I | G1         | PRE-TERM  | 44                        | 5  | 623.9                    | 1182  | 919.1 | 210.8  | 883.0    | 858.5            | 1048             |
| LNDFH-I | G1         | PRE-TERM  | 45                        | 9  | 34.15                    | 1249  | 798.7 | 354.9  | 859.1    | 630.9            | 1001             |
| LNDFH-I | G1         | PRE-TERM  | 46                        | 6  | 574.6                    | 1431  | 915.3 | 320.6  | 866.4    | 682.7            | 1065             |
| LNDFH-I | G1         | PRE-TERM  | 47                        | 3  | 578.1                    | 1327  | 833.6 | 427.2  | 595.8    | 587.0            | 961.3            |
| LNDFH-I | G1         | PRE-TERM  | 48                        | 4  | 530.1                    | 967.5 | 693.6 | 192.1  | 638.3    | 582.8            | 749.1            |
| LNDFH-I | G1         | TERM      | 38                        | 2  | 1301                     | 1689  | 1495  | 274.3  | 1495     | 1398             | 1592             |
| LNDFH-I | G1         | TERM      | 39                        | 9  | 846.1                    | 1755  | 1228  | 347.3  | 1197     | 947.1            | 1445             |
| LNDFH-I | G1         | TERM      | 40                        | 13 | 825.9                    | 2122  | 1433  | 424.7  | 1542     | 1015             | 1673             |
| LNDFH-I | G1         | TERM      | 41                        | 21 | 827.5                    | 2264  | 1316  | 393.0  | 1200     | 1044             | 1479             |
| LNDFH-I | G1         | TERM      | 42                        | 21 | 816.4                    | 2313  | 1308  | 403.8  | 1252     | 1067             | 1380             |
| LNDFH-I | G1         | TERM      | 43                        | 21 | 692.6                    | 1937  | 1194  | 368.2  | 1131     | 951.4            | 1431             |
| LNDFH-I | G1         | TERM      | 44                        | 20 | 464.2                    | 1983  | 1096  | 432.3  | 1123     | 786.6            | 1301             |
| LNDFH-I | G1         | TERM      | 45                        | 21 | 548.4                    | 2024  | 1050  | 381.6  | 953.3    | 800.7            | 1239             |
| LNDFH-I | G1         | TERM      | 46                        | 17 | 458.7                    | 2167  | 1002  | 454.9  | 921.7    | 649.6            | 1305             |
| LNDFH-I | G1         | TERM      | 47                        | 12 | 5.000                    | 1935  | 958.9 | 587.6  | 992.5    | 467.8            | 1249             |
| LNDFH-I | G1         | TERM      | 48                        | 6  | 441.2                    | 1304  | 883.1 | 356.4  | 956.7    | 578.2            | 1130             |
| LNDFH-I | G2         | PRE-TERM  | 29                        | 1  | 115.7                    | 115.7 | 115.7 | NA     | 115.7    | 115.7            | 115.7            |
| LNDFH-I | G2         | PRE-TERM  | 30                        | 2  | 5.000                    | 65.99 | 35.49 | 43.13  | 35.49    | 20.25            | 50.74            |
| LNDFH-I | G2         | PRE-TERM  | 31                        | 2  | 5.000                    | 56.94 | 30.97 | 36.73  | 30.97    | 17.99            | 43.96            |
| LNDFH-I | G2         | PRE-TERM  | 32                        | 3  | 5.000                    | 22.95 | 10.98 | 10.36  | 5.000    | 5.000            | 13.97            |
| LNDFH-I | G2         | PRE-TERM  | 33                        | 5  | 5.000                    | 24.70 | 8.940 | 8.810  | 5.000    | 5.000            | 5.000            |
| LNDFH-I | G2         | PRE-TERM  | 34                        | 5  | 5.000                    | 22.52 | 8.505 | 7.836  | 5.000    | 5.000            | 5.000            |
| LNDFH-I | G2         | PRE-TERM  | 35                        | 5  | 5.000                    | 22.32 | 8.464 | 7.746  | 5.000    | 5.000            | 5.000            |
| LNDFH-I | G2         | PRE-TERM  | 36                        | 5  | 5.000                    | 21.68 | 8.336 | 7.460  | 5.000    | 5.000            | 5.000            |
| LNDFH-I | G2         | PRE-TERM  | 37                        | 4  | 5.000                    | 5.000 | 5.000 | 0.0000 | 5.000    | 5.000            | 5.000            |
| LNDFH-I | G2         | PRE-TERM  | 38                        | 4  | 5.000                    | 15.92 | 7.731 | 5.462  | 5.000    | 5.000            | 7.731            |

**Table S4 Concentration of Human Milk Oligosaccharides in Term or Preterm Milk At Specified Postmenstrual Age Separated By Milk Group**

\* When there are results below the method limit of quantification (LoQ) the result has been assigned value of  $0.5 \times \text{LoQ}$ , hence the minimum value appears to be the same in many cases. When a large number of datapoints are below LoQ this can also have the effect that the median = minimum.

| HMO     | Milk Group | Study Arm | Postmenstrual Age (weeks) | N | HMO Concentration (mg/L) |       |       |        |          |                  |                  |
|---------|------------|-----------|---------------------------|---|--------------------------|-------|-------|--------|----------|------------------|------------------|
|         |            |           |                           |   | min *                    | max   | mean  | sd     | median * | Quartile 1 (25%) | Quartile 3 (75%) |
| LNDFH-I | G2         | PRE-TERM  | 39                        | 3 | 5.000                    | 5.000 | 5.000 | 0.0000 | 5.000    | 5.000            | 5.000            |
| LNDFH-I | G2         | PRE-TERM  | 40                        | 3 | 5.000                    | 14.75 | 8.249 | 5.627  | 5.000    | 5.000            | 9.874            |
| LNDFH-I | G2         | PRE-TERM  | 41                        | 2 | 5.000                    | 5.000 | 5.000 | 0.0000 | 5.000    | 5.000            | 5.000            |
| LNDFH-I | G2         | PRE-TERM  | 42                        | 3 | 5.000                    | 14.03 | 8.011 | 5.214  | 5.000    | 5.000            | 9.516            |
| LNDFH-I | G2         | PRE-TERM  | 43                        | 2 | 5.000                    | 5.000 | 5.000 | 0.0000 | 5.000    | 5.000            | 5.000            |
| LNDFH-I | G2         | PRE-TERM  | 44                        | 3 | 5.000                    | 11.93 | 7.311 | 4.002  | 5.000    | 5.000            | 8.466            |
| LNDFH-I | G2         | PRE-TERM  | 45                        | 2 | 5.000                    | 5.000 | 5.000 | 0.0000 | 5.000    | 5.000            | 5.000            |
| LNDFH-I | G2         | PRE-TERM  | 46                        | 2 | 5.000                    | 5.000 | 5.000 | 0.0000 | 5.000    | 5.000            | 5.000            |
| LNDFH-I | G2         | PRE-TERM  | 48                        | 1 | 5.000                    | 5.000 | 5.000 | NA     | 5.000    | 5.000            | 5.000            |
| LNDFH-I | G2         | TERM      | 39                        | 1 | 5.000                    | 5.000 | 5.000 | NA     | 5.000    | 5.000            | 5.000            |
| LNDFH-I | G2         | TERM      | 40                        | 5 | 5.000                    | 5.000 | 5.000 | 0.0000 | 5.000    | 5.000            | 5.000            |
| LNDFH-I | G2         | TERM      | 41                        | 4 | 5.000                    | 5.000 | 5.000 | 0.0000 | 5.000    | 5.000            | 5.000            |
| LNDFH-I | G2         | TERM      | 42                        | 6 | 5.000                    | 5.000 | 5.000 | 0.0000 | 5.000    | 5.000            | 5.000            |
| LNDFH-I | G2         | TERM      | 43                        | 5 | 5.000                    | 15.85 | 7.171 | 4.853  | 5.000    | 5.000            | 5.000            |
| LNDFH-I | G2         | TERM      | 44                        | 5 | 5.000                    | 11.89 | 6.378 | 3.082  | 5.000    | 5.000            | 5.000            |
| LNDFH-I | G2         | TERM      | 45                        | 5 | 5.000                    | 5.000 | 5.000 | 0.0000 | 5.000    | 5.000            | 5.000            |
| LNDFH-I | G2         | TERM      | 46                        | 5 | 5.000                    | 5.000 | 5.000 | 0.0000 | 5.000    | 5.000            | 5.000            |
| LNDFH-I | G2         | TERM      | 47                        | 4 | 5.000                    | 5.000 | 5.000 | 0.0000 | 5.000    | 5.000            | 5.000            |
| LNDFH-I | G3         | PRE-TERM  | 30                        | 1 | 5.000                    | 5.000 | 5.000 | NA     | 5.000    | 5.000            | 5.000            |
| LNDFH-I | G3         | PRE-TERM  | 31                        | 1 | 5.000                    | 5.000 | 5.000 | NA     | 5.000    | 5.000            | 5.000            |
| LNDFH-I | G3         | PRE-TERM  | 32                        | 1 | 5.000                    | 5.000 | 5.000 | NA     | 5.000    | 5.000            | 5.000            |
| LNDFH-I | G3         | PRE-TERM  | 33                        | 1 | 5.000                    | 5.000 | 5.000 | NA     | 5.000    | 5.000            | 5.000            |
| LNDFH-I | G3         | PRE-TERM  | 34                        | 1 | 5.000                    | 5.000 | 5.000 | NA     | 5.000    | 5.000            | 5.000            |
| LNDFH-I | G3         | PRE-TERM  | 35                        | 1 | 5.000                    | 5.000 | 5.000 | NA     | 5.000    | 5.000            | 5.000            |
| LNDFH-I | G3         | PRE-TERM  | 36                        | 1 | 5.000                    | 5.000 | 5.000 | NA     | 5.000    | 5.000            | 5.000            |
| LNDFH-I | G3         | PRE-TERM  | 37                        | 1 | 5.000                    | 5.000 | 5.000 | NA     | 5.000    | 5.000            | 5.000            |
| LNDFH-I | G3         | PRE-TERM  | 39                        | 1 | 5.000                    | 5.000 | 5.000 | NA     | 5.000    | 5.000            | 5.000            |
| LNDFH-I | G3         | PRE-TERM  | 41                        | 1 | 5.000                    | 5.000 | 5.000 | NA     | 5.000    | 5.000            | 5.000            |
| LNDFH-I | G3         | PRE-TERM  | 43                        | 1 | 5.000                    | 5.000 | 5.000 | NA     | 5.000    | 5.000            | 5.000            |
| LNDFH-I | G3         | PRE-TERM  | 45                        | 1 | 5.000                    | 5.000 | 5.000 | NA     | 5.000    | 5.000            | 5.000            |
| LNDFH-I | G3         | TERM      | 41                        | 1 | 5.000                    | 5.000 | 5.000 | NA     | 5.000    | 5.000            | 5.000            |
| LNDFH-I | G3         | TERM      | 42                        | 1 | 5.000                    | 5.000 | 5.000 | NA     | 5.000    | 5.000            | 5.000            |
| LNDFH-I | G3         | TERM      | 43                        | 1 | 5.000                    | 5.000 | 5.000 | NA     | 5.000    | 5.000            | 5.000            |
| LNDFH-I | G3         | TERM      | 44                        | 1 | 5.000                    | 5.000 | 5.000 | NA     | 5.000    | 5.000            | 5.000            |
| LNDFH-I | G3         | TERM      | 45                        | 1 | 5.000                    | 5.000 | 5.000 | NA     | 5.000    | 5.000            | 5.000            |
| LNDFH-I | G3         | TERM      | 46                        | 1 | 5.000                    | 5.000 | 5.000 | NA     | 5.000    | 5.000            | 5.000            |

**Table S4 Concentration of Human Milk Oligosaccharides in Term or Preterm Milk At Specified Postmenstrual Age Separated By Milk Group**

\* When there are results below the method limit of quantification (LoQ) the result has been assigned value of  $0.5 \times \text{LoQ}$ , hence the minimum value appears to be the same in many cases. When a large number of datapoints are below LoQ this can also have the effect that the median = minimum.

| HMO     | Milk Group | Study Arm | Postmenstrual Age (weeks) | N  | HMO Concentration (mg/L) |       |       |       |          |                  |                  |
|---------|------------|-----------|---------------------------|----|--------------------------|-------|-------|-------|----------|------------------|------------------|
|         |            |           |                           |    | min *                    | max   | mean  | sd    | median * | Quartile 1 (25%) | Quartile 3 (75%) |
| LNDFH-I | G3         | TERM      | 47                        | 1  | 5.000                    | 5.000 | 5.000 | NA    | 5.000    | 5.000            | 5.000            |
| LNDFH-I | G3         | TERM      | 48                        | 1  | 5.000                    | 5.000 | 5.000 | NA    | 5.000    | 5.000            | 5.000            |
| LNDFH-I | G4         | TERM      | 40                        | 1  | 5.000                    | 5.000 | 5.000 | NA    | 5.000    | 5.000            | 5.000            |
| LNDFH-I | G4         | TERM      | 41                        | 1  | 5.000                    | 5.000 | 5.000 | NA    | 5.000    | 5.000            | 5.000            |
| LNDFH-I | G4         | TERM      | 42                        | 1  | 5.000                    | 5.000 | 5.000 | NA    | 5.000    | 5.000            | 5.000            |
| LNDFH-I | G4         | TERM      | 43                        | 1  | 5.000                    | 5.000 | 5.000 | NA    | 5.000    | 5.000            | 5.000            |
| LNDFH-I | G4         | TERM      | 44                        | 1  | 5.000                    | 5.000 | 5.000 | NA    | 5.000    | 5.000            | 5.000            |
| LNDFH-I | G4         | TERM      | 45                        | 1  | 5.000                    | 5.000 | 5.000 | NA    | 5.000    | 5.000            | 5.000            |
| LNDFH-I | G4         | TERM      | 46                        | 1  | 5.000                    | 5.000 | 5.000 | NA    | 5.000    | 5.000            | 5.000            |
| LNDFH-I | G4         | TERM      | 47                        | 1  | 5.000                    | 5.000 | 5.000 | NA    | 5.000    | 5.000            | 5.000            |
| LNFP-I  | G1         | PRE-TERM  | 30                        | 7  | 13.50                    | 2005  | 1411  | 739.8 | 1712     | 1217             | 1857             |
| LNFP-I  | G1         | PRE-TERM  | 31                        | 9  | 13.50                    | 2630  | 1321  | 792.2 | 1413     | 956.9            | 1493             |
| LNFP-I  | G1         | PRE-TERM  | 32                        | 13 | 13.50                    | 2806  | 1291  | 691.1 | 1232     | 876.2            | 1448             |
| LNFP-I  | G1         | PRE-TERM  | 33                        | 18 | 13.50                    | 2027  | 1172  | 465.4 | 1098     | 964.7            | 1439             |
| LNFP-I  | G1         | PRE-TERM  | 34                        | 19 | 13.50                    | 1634  | 1004  | 414.2 | 978.5    | 745.0            | 1359             |
| LNFP-I  | G1         | PRE-TERM  | 35                        | 18 | 13.50                    | 1840  | 902.1 | 401.3 | 823.9    | 708.6            | 1055             |
| LNFP-I  | G1         | PRE-TERM  | 36                        | 19 | 13.50                    | 1773  | 859.4 | 425.2 | 673.9    | 606.6            | 1122             |
| LNFP-I  | G1         | PRE-TERM  | 37                        | 18 | 13.50                    | 1188  | 716.2 | 322.2 | 677.8    | 492.4            | 952.2            |
| LNFP-I  | G1         | PRE-TERM  | 38                        | 11 | 301.9                    | 1126  | 621.2 | 296.6 | 596.0    | 391.5            | 746.2            |
| LNFP-I  | G1         | PRE-TERM  | 39                        | 16 | 13.50                    | 1436  | 618.7 | 331.9 | 538.0    | 441.7            | 765.7            |
| LNFP-I  | G1         | PRE-TERM  | 40                        | 7  | 349.8                    | 1075  | 639.0 | 281.0 | 490.3    | 429.0            | 850.0            |
| LNFP-I  | G1         | PRE-TERM  | 41                        | 12 | 13.50                    | 789.6 | 477.1 | 244.6 | 504.2    | 349.9            | 613.8            |
| LNFP-I  | G1         | PRE-TERM  | 42                        | 6  | 259.1                    | 966.6 | 541.5 | 269.2 | 528.7    | 328.3            | 660.6            |
| LNFP-I  | G1         | PRE-TERM  | 43                        | 10 | 13.50                    | 1014  | 546.9 | 314.6 | 556.2    | 332.0            | 793.2            |
| LNFP-I  | G1         | PRE-TERM  | 44                        | 5  | 259.0                    | 549.4 | 417.6 | 108.1 | 404.8    | 396.8            | 477.8            |
| LNFP-I  | G1         | PRE-TERM  | 45                        | 9  | 13.50                    | 933.6 | 386.1 | 305.2 | 327.9    | 177.2            | 604.8            |
| LNFP-I  | G1         | PRE-TERM  | 46                        | 6  | 131.5                    | 717.8 | 400.9 | 199.4 | 408.4    | 293.8            | 464.7            |
| LNFP-I  | G1         | PRE-TERM  | 47                        | 3  | 195.2                    | 635.0 | 376.5 | 229.8 | 299.3    | 247.3            | 467.2            |
| LNFP-I  | G1         | PRE-TERM  | 48                        | 4  | 142.5                    | 377.1 | 240.0 | 107.5 | 220.2    | 161.1            | 299.0            |
| LNFP-I  | G1         | TERM      | 38                        | 2  | 1760                     | 1768  | 1764  | 6.024 | 1764     | 1762             | 1766             |
| LNFP-I  | G1         | TERM      | 39                        | 9  | 685.4                    | 2547  | 1685  | 731.5 | 1998     | 1026             | 2287             |
| LNFP-I  | G1         | TERM      | 40                        | 13 | 505.8                    | 3381  | 1825  | 837.9 | 1581     | 1228             | 2247             |
| LNFP-I  | G1         | TERM      | 41                        | 21 | 492.7                    | 3597  | 1909  | 834.5 | 1740     | 1388             | 2489             |
| LNFP-I  | G1         | TERM      | 42                        | 21 | 418.7                    | 3156  | 1560  | 690.6 | 1318     | 1198             | 1841             |
| LNFP-I  | G1         | TERM      | 43                        | 21 | 290.2                    | 2655  | 1233  | 674.8 | 1007     | 831.7            | 1715             |
| LNFP-I  | G1         | TERM      | 44                        | 20 | 231.4                    | 2647  | 1012  | 622.9 | 814.4    | 621.9            | 1273             |

**Table S4 Concentration of Human Milk Oligosaccharides in Term or Preterm Milk At Specified Postmenstrual Age Separated By Milk Group**

\* When there are results below the method limit of quantification (LoQ) the result has been assigned value of  $0.5 \times \text{LoQ}$ , hence the minimum value appears to be the same in many cases. When a large number of datapoints are below LoQ this can also have the effect that the median = minimum.

| HMO    | Milk Group | Study Arm | Postmenstrual Age (weeks) | N  | HMO Concentration (mg/L) |       |       |        |          |                  |                  |
|--------|------------|-----------|---------------------------|----|--------------------------|-------|-------|--------|----------|------------------|------------------|
|        |            |           |                           |    | min *                    | max   | mean  | sd     | median * | Quartile 1 (25%) | Quartile 3 (75%) |
| LNFP-I | G1         | TERM      | 45                        | 21 | 216.7                    | 1899  | 824.8 | 419.6  | 760.3    | 567.3            | 1004             |
| LNFP-I | G1         | TERM      | 46                        | 17 | 192.0                    | 1956  | 730.2 | 449.1  | 656.2    | 469.8            | 833.5            |
| LNFP-I | G1         | TERM      | 47                        | 12 | 168.8                    | 2617  | 850.9 | 613.4  | 790.9    | 640.8            | 853.1            |
| LNFP-I | G1         | TERM      | 48                        | 6  | 192.3                    | 1715  | 796.3 | 535.5  | 640.3    | 522.5            | 989.9            |
| LNFP-I | G2         | PRE-TERM  | 29                        | 1  | 13.50                    | 13.50 | 13.50 | NA     | 13.50    | 13.50            | 13.50            |
| LNFP-I | G2         | PRE-TERM  | 30                        | 2  | 13.50                    | 13.50 | 13.50 | 0.0000 | 13.50    | 13.50            | 13.50            |
| LNFP-I | G2         | PRE-TERM  | 31                        | 2  | 13.50                    | 13.50 | 13.50 | 0.0000 | 13.50    | 13.50            | 13.50            |
| LNFP-I | G2         | PRE-TERM  | 32                        | 3  | 13.50                    | 13.50 | 13.50 | 0.0000 | 13.50    | 13.50            | 13.50            |
| LNFP-I | G2         | PRE-TERM  | 33                        | 5  | 13.50                    | 13.50 | 13.50 | 0.0000 | 13.50    | 13.50            | 13.50            |
| LNFP-I | G2         | PRE-TERM  | 34                        | 5  | 13.50                    | 13.50 | 13.50 | 0.0000 | 13.50    | 13.50            | 13.50            |
| LNFP-I | G2         | PRE-TERM  | 35                        | 5  | 13.50                    | 13.50 | 13.50 | 0.0000 | 13.50    | 13.50            | 13.50            |
| LNFP-I | G2         | PRE-TERM  | 36                        | 5  | 13.50                    | 13.50 | 13.50 | 0.0000 | 13.50    | 13.50            | 13.50            |
| LNFP-I | G2         | PRE-TERM  | 37                        | 4  | 13.50                    | 13.50 | 13.50 | 0.0000 | 13.50    | 13.50            | 13.50            |
| LNFP-I | G2         | PRE-TERM  | 38                        | 4  | 13.50                    | 13.50 | 13.50 | 0.0000 | 13.50    | 13.50            | 13.50            |
| LNFP-I | G2         | PRE-TERM  | 39                        | 3  | 13.50                    | 13.50 | 13.50 | 0.0000 | 13.50    | 13.50            | 13.50            |
| LNFP-I | G2         | PRE-TERM  | 40                        | 3  | 13.50                    | 13.50 | 13.50 | 0.0000 | 13.50    | 13.50            | 13.50            |
| LNFP-I | G2         | PRE-TERM  | 41                        | 2  | 13.50                    | 13.50 | 13.50 | 0.0000 | 13.50    | 13.50            | 13.50            |
| LNFP-I | G2         | PRE-TERM  | 42                        | 3  | 13.50                    | 13.50 | 13.50 | 0.0000 | 13.50    | 13.50            | 13.50            |
| LNFP-I | G2         | PRE-TERM  | 43                        | 2  | 13.50                    | 13.50 | 13.50 | 0.0000 | 13.50    | 13.50            | 13.50            |
| LNFP-I | G2         | PRE-TERM  | 44                        | 3  | 13.50                    | 13.50 | 13.50 | 0.0000 | 13.50    | 13.50            | 13.50            |
| LNFP-I | G2         | PRE-TERM  | 45                        | 2  | 13.50                    | 13.50 | 13.50 | 0.0000 | 13.50    | 13.50            | 13.50            |
| LNFP-I | G2         | PRE-TERM  | 46                        | 2  | 13.50                    | 13.50 | 13.50 | 0.0000 | 13.50    | 13.50            | 13.50            |
| LNFP-I | G2         | PRE-TERM  | 48                        | 1  | 13.50                    | 13.50 | 13.50 | NA     | 13.50    | 13.50            | 13.50            |
| LNFP-I | G2         | TERM      | 39                        | 1  | 13.50                    | 13.50 | 13.50 | NA     | 13.50    | 13.50            | 13.50            |
| LNFP-I | G2         | TERM      | 40                        | 5  | 13.50                    | 13.50 | 13.50 | 0.0000 | 13.50    | 13.50            | 13.50            |
| LNFP-I | G2         | TERM      | 41                        | 4  | 13.50                    | 13.50 | 13.50 | 0.0000 | 13.50    | 13.50            | 13.50            |
| LNFP-I | G2         | TERM      | 42                        | 6  | 13.50                    | 13.50 | 13.50 | 0.0000 | 13.50    | 13.50            | 13.50            |
| LNFP-I | G2         | TERM      | 43                        | 5  | 13.50                    | 13.50 | 13.50 | 0.0000 | 13.50    | 13.50            | 13.50            |
| LNFP-I | G2         | TERM      | 44                        | 5  | 13.50                    | 13.50 | 13.50 | 0.0000 | 13.50    | 13.50            | 13.50            |
| LNFP-I | G2         | TERM      | 45                        | 5  | 13.50                    | 13.50 | 13.50 | 0.0000 | 13.50    | 13.50            | 13.50            |
| LNFP-I | G2         | TERM      | 46                        | 5  | 13.50                    | 13.50 | 13.50 | 0.0000 | 13.50    | 13.50            | 13.50            |
| LNFP-I | G2         | TERM      | 47                        | 4  | 13.50                    | 13.50 | 13.50 | 0.0000 | 13.50    | 13.50            | 13.50            |
| LNFP-I | G3         | PRE-TERM  | 30                        | 1  | 2639                     | 2639  | 2639  | NA     | 2639     | 2639             | 2639             |
| LNFP-I | G3         | PRE-TERM  | 31                        | 1  | 2195                     | 2195  | 2195  | NA     | 2195     | 2195             | 2195             |
| LNFP-I | G3         | PRE-TERM  | 32                        | 1  | 2178                     | 2178  | 2178  | NA     | 2178     | 2178             | 2178             |
| LNFP-I | G3         | PRE-TERM  | 33                        | 1  | 2062                     | 2062  | 2062  | NA     | 2062     | 2062             | 2062             |

**Table S4 Concentration of Human Milk Oligosaccharides in Term or Preterm Milk At Specified Postmenstrual Age Separated By Milk Group**

\* When there are results below the method limit of quantification (LoQ) the result has been assigned value of  $0.5 \times \text{LoQ}$ , hence the minimum value appears to be the same in many cases. When a large number of datapoints are below LoQ this can also have the effect that the median = minimum.

| HMO     | Milk Group | Study Arm | Postmenstrual Age (weeks) | N  | HMO Concentration (mg/L) |       |       |       |          |                  |                  |
|---------|------------|-----------|---------------------------|----|--------------------------|-------|-------|-------|----------|------------------|------------------|
|         |            |           |                           |    | min *                    | max   | mean  | sd    | median * | Quartile 1 (25%) | Quartile 3 (75%) |
| LNFP-I  | G3         | PRE-TERM  | 34                        | 1  | 1624                     | 1624  | 1624  | NA    | 1624     | 1624             | 1624             |
| LNFP-I  | G3         | PRE-TERM  | 35                        | 1  | 1332                     | 1332  | 1332  | NA    | 1332     | 1332             | 1332             |
| LNFP-I  | G3         | PRE-TERM  | 36                        | 1  | 949.2                    | 949.2 | 949.2 | NA    | 949.2    | 949.2            | 949.2            |
| LNFP-I  | G3         | PRE-TERM  | 37                        | 1  | 960.9                    | 960.9 | 960.9 | NA    | 960.9    | 960.9            | 960.9            |
| LNFP-I  | G3         | PRE-TERM  | 39                        | 1  | 807.3                    | 807.3 | 807.3 | NA    | 807.3    | 807.3            | 807.3            |
| LNFP-I  | G3         | PRE-TERM  | 41                        | 1  | 829.3                    | 829.3 | 829.3 | NA    | 829.3    | 829.3            | 829.3            |
| LNFP-I  | G3         | PRE-TERM  | 43                        | 1  | 829.0                    | 829.0 | 829.0 | NA    | 829.0    | 829.0            | 829.0            |
| LNFP-I  | G3         | PRE-TERM  | 45                        | 1  | 784.9                    | 784.9 | 784.9 | NA    | 784.9    | 784.9            | 784.9            |
| LNFP-I  | G3         | TERM      | 41                        | 1  | 2392                     | 2392  | 2392  | NA    | 2392     | 2392             | 2392             |
| LNFP-I  | G3         | TERM      | 42                        | 1  | 1768                     | 1768  | 1768  | NA    | 1768     | 1768             | 1768             |
| LNFP-I  | G3         | TERM      | 43                        | 1  | 2027                     | 2027  | 2027  | NA    | 2027     | 2027             | 2027             |
| LNFP-I  | G3         | TERM      | 44                        | 1  | 1812                     | 1812  | 1812  | NA    | 1812     | 1812             | 1812             |
| LNFP-I  | G3         | TERM      | 45                        | 1  | 1850                     | 1850  | 1850  | NA    | 1850     | 1850             | 1850             |
| LNFP-I  | G3         | TERM      | 46                        | 1  | 1480                     | 1480  | 1480  | NA    | 1480     | 1480             | 1480             |
| LNFP-I  | G3         | TERM      | 47                        | 1  | 1320                     | 1320  | 1320  | NA    | 1320     | 1320             | 1320             |
| LNFP-I  | G3         | TERM      | 48                        | 1  | 1180                     | 1180  | 1180  | NA    | 1180     | 1180             | 1180             |
| LNFP-I  | G4         | TERM      | 40                        | 1  | 13.50                    | 13.50 | 13.50 | NA    | 13.50    | 13.50            | 13.50            |
| LNFP-I  | G4         | TERM      | 41                        | 1  | 13.50                    | 13.50 | 13.50 | NA    | 13.50    | 13.50            | 13.50            |
| LNFP-I  | G4         | TERM      | 42                        | 1  | 13.50                    | 13.50 | 13.50 | NA    | 13.50    | 13.50            | 13.50            |
| LNFP-I  | G4         | TERM      | 43                        | 1  | 13.50                    | 13.50 | 13.50 | NA    | 13.50    | 13.50            | 13.50            |
| LNFP-I  | G4         | TERM      | 44                        | 1  | 13.50                    | 13.50 | 13.50 | NA    | 13.50    | 13.50            | 13.50            |
| LNFP-I  | G4         | TERM      | 45                        | 1  | 13.50                    | 13.50 | 13.50 | NA    | 13.50    | 13.50            | 13.50            |
| LNFP-I  | G4         | TERM      | 46                        | 1  | 13.50                    | 13.50 | 13.50 | NA    | 13.50    | 13.50            | 13.50            |
| LNFP-I  | G4         | TERM      | 47                        | 1  | 13.50                    | 13.50 | 13.50 | NA    | 13.50    | 13.50            | 13.50            |
| LNFP-II | G1         | PRE-TERM  | 30                        | 7  | 115.2                    | 1108  | 350.0 | 354.2 | 190.9    | 134.9            | 383.2            |
| LNFP-II | G1         | PRE-TERM  | 31                        | 9  | 165.2                    | 1108  | 391.0 | 293.7 | 287.7    | 226.1            | 478.5            |
| LNFP-II | G1         | PRE-TERM  | 32                        | 13 | 124.0                    | 975.6 | 351.4 | 258.8 | 230.7    | 164.5            | 422.1            |
| LNFP-II | G1         | PRE-TERM  | 33                        | 18 | 95.46                    | 918.9 | 349.9 | 218.2 | 281.4    | 192.2            | 522.5            |
| LNFP-II | G1         | PRE-TERM  | 34                        | 19 | 136.4                    | 865.6 | 402.3 | 238.1 | 321.2    | 189.2            | 566.3            |
| LNFP-II | G1         | PRE-TERM  | 35                        | 18 | 122.1                    | 946.4 | 415.3 | 233.4 | 358.4    | 260.4            | 521.4            |
| LNFP-II | G1         | PRE-TERM  | 36                        | 19 | 141.8                    | 982.3 | 412.4 | 243.3 | 389.4    | 205.8            | 524.8            |
| LNFP-II | G1         | PRE-TERM  | 37                        | 18 | 121.7                    | 891.0 | 404.5 | 225.9 | 402.5    | 231.9            | 511.6            |
| LNFP-II | G1         | PRE-TERM  | 38                        | 11 | 68.91                    | 849.5 | 320.8 | 248.2 | 230.0    | 143.4            | 443.4            |
| LNFP-II | G1         | PRE-TERM  | 39                        | 16 | 146.0                    | 858.2 | 415.8 | 255.0 | 331.1    | 205.1            | 590.1            |
| LNFP-II | G1         | PRE-TERM  | 40                        | 7  | 149.3                    | 911.4 | 451.7 | 317.8 | 255.0    | 206.7            | 716.4            |
| LNFP-II | G1         | PRE-TERM  | 41                        | 12 | 92.35                    | 633.7 | 331.0 | 177.1 | 287.0    | 204.3            | 445.8            |

**Table S4 Concentration of Human Milk Oligosaccharides in Term or Preterm Milk At Specified Postmenstrual Age Separated By Milk Group**

\* When there are results below the method limit of quantification (LoQ) the result has been assigned value of  $0.5 \times \text{LoQ}$ , hence the minimum value appears to be the same in many cases. When a large number of datapoints are below LoQ this can also have the effect that the median = minimum.

| HMO     | Milk Group | Study Arm | Postmenstrual Age (weeks) | N  | HMO Concentration (mg/L) |       |       |       |          |                  |                  |
|---------|------------|-----------|---------------------------|----|--------------------------|-------|-------|-------|----------|------------------|------------------|
|         |            |           |                           |    | min *                    | max   | mean  | sd    | median * | Quartile 1 (25%) | Quartile 3 (75%) |
| LNFP-II | G1         | PRE-TERM  | 42                        | 6  | 141.6                    | 757.1 | 438.3 | 271.6 | 437.0    | 208.8            | 652.6            |
| LNFP-II | G1         | PRE-TERM  | 43                        | 10 | 183.5                    | 728.3 | 388.8 | 173.9 | 383.3    | 234.2            | 485.8            |
| LNFP-II | G1         | PRE-TERM  | 44                        | 5  | 160.6                    | 688.8 | 442.1 | 216.1 | 510.0    | 281.3            | 569.8            |
| LNFP-II | G1         | PRE-TERM  | 45                        | 9  | 128.3                    | 1014  | 384.7 | 255.2 | 369.5    | 297.0            | 395.8            |
| LNFP-II | G1         | PRE-TERM  | 46                        | 6  | 121.9                    | 754.0 | 406.5 | 255.9 | 406.9    | 191.7            | 573.8            |
| LNFP-II | G1         | PRE-TERM  | 47                        | 3  | 168.9                    | 386.9 | 311.6 | 123.6 | 378.9    | 273.9            | 382.9            |
| LNFP-II | G1         | PRE-TERM  | 48                        | 4  | 118.0                    | 654.3 | 380.8 | 236.2 | 375.5    | 229.8            | 526.5            |
| LNFP-II | G1         | TERM      | 38                        | 2  | 222.1                    | 251.5 | 236.8 | 20.83 | 236.8    | 229.4            | 244.2            |
| LNFP-II | G1         | TERM      | 39                        | 9  | 85.02                    | 421.9 | 215.0 | 119.8 | 161.8    | 127.1            | 269.3            |
| LNFP-II | G1         | TERM      | 40                        | 13 | 55.63                    | 596.3 | 308.5 | 138.5 | 268.6    | 231.0            | 347.7            |
| LNFP-II | G1         | TERM      | 41                        | 21 | 112.6                    | 1204  | 370.5 | 257.8 | 319.6    | 193.0            | 434.2            |
| LNFP-II | G1         | TERM      | 42                        | 21 | 147.7                    | 686.4 | 338.1 | 156.6 | 308.5    | 203.2            | 424.8            |
| LNFP-II | G1         | TERM      | 43                        | 21 | 149.7                    | 1531  | 397.2 | 306.6 | 328.3    | 201.6            | 479.6            |
| LNFP-II | G1         | TERM      | 44                        | 20 | 127.0                    | 718.3 | 312.9 | 160.0 | 250.7    | 202.3            | 395.3            |
| LNFP-II | G1         | TERM      | 45                        | 21 | 137.6                    | 824.7 | 329.4 | 185.1 | 312.4    | 186.1            | 371.0            |
| LNFP-II | G1         | TERM      | 46                        | 17 | 96.47                    | 846.5 | 339.1 | 217.1 | 289.8    | 173.9            | 429.2            |
| LNFP-II | G1         | TERM      | 47                        | 12 | 126.2                    | 854.5 | 330.3 | 244.5 | 215.1    | 152.9            | 403.3            |
| LNFP-II | G1         | TERM      | 48                        | 6  | 112.3                    | 382.2 | 214.4 | 90.56 | 198.4    | 179.0            | 216.6            |
| LNFP-II | G2         | PRE-TERM  | 29                        | 1  | 2094                     | 2094  | 2094  | NA    | 2094     | 2094             | 2094             |
| LNFP-II | G2         | PRE-TERM  | 30                        | 2  | 1328                     | 1740  | 1534  | 291.4 | 1534     | 1431             | 1637             |
| LNFP-II | G2         | PRE-TERM  | 31                        | 2  | 1514                     | 1628  | 1571  | 80.82 | 1571     | 1543             | 1600             |
| LNFP-II | G2         | PRE-TERM  | 32                        | 3  | 930.8                    | 1775  | 1380  | 424.7 | 1435     | 1183             | 1605             |
| LNFP-II | G2         | PRE-TERM  | 33                        | 5  | 897.4                    | 1845  | 1503  | 374.6 | 1667     | 1402             | 1703             |
| LNFP-II | G2         | PRE-TERM  | 34                        | 5  | 791.2                    | 1950  | 1452  | 516.7 | 1736     | 1006             | 1775             |
| LNFP-II | G2         | PRE-TERM  | 35                        | 5  | 774.2                    | 2138  | 1495  | 603.1 | 1696     | 947.4            | 1922             |
| LNFP-II | G2         | PRE-TERM  | 36                        | 5  | 730.6                    | 2220  | 1541  | 651.4 | 1597     | 1044             | 2116             |
| LNFP-II | G2         | PRE-TERM  | 37                        | 4  | 1023                     | 1804  | 1493  | 333.2 | 1572     | 1408             | 1657             |
| LNFP-II | G2         | PRE-TERM  | 38                        | 4  | 656.5                    | 2024  | 1231  | 573.6 | 1121     | 973.6            | 1378             |
| LNFP-II | G2         | PRE-TERM  | 39                        | 3  | 983.3                    | 1942  | 1325  | 535.7 | 1050     | 1016             | 1496             |
| LNFP-II | G2         | PRE-TERM  | 40                        | 3  | 630.5                    | 1468  | 1046  | 418.9 | 1039     | 834.6            | 1253             |
| LNFP-II | G2         | PRE-TERM  | 41                        | 2  | 1180                     | 2373  | 1777  | 843.8 | 1777     | 1478             | 2075             |
| LNFP-II | G2         | PRE-TERM  | 42                        | 3  | 601.3                    | 1432  | 927.1 | 443.2 | 748.0    | 674.7            | 1090             |
| LNFP-II | G2         | PRE-TERM  | 43                        | 2  | 643.6                    | 1476  | 1060  | 588.8 | 1060     | 851.8            | 1268             |
| LNFP-II | G2         | PRE-TERM  | 44                        | 3  | 561.9                    | 1571  | 933.6 | 554.5 | 668.0    | 614.9            | 1119             |
| LNFP-II | G2         | PRE-TERM  | 45                        | 2  | 784.2                    | 2593  | 1689  | 1279  | 1689     | 1236             | 2141             |
| LNFP-II | G2         | PRE-TERM  | 46                        | 2  | 483.6                    | 1367  | 925.2 | 624.4 | 925.2    | 704.4            | 1146             |

**Table S4 Concentration of Human Milk Oligosaccharides in Term or Preterm Milk At Specified Postmenstrual Age Separated By Milk Group**

\* When there are results below the method limit of quantification (LoQ) the result has been assigned value of  $0.5 \times \text{LoQ}$ , hence the minimum value appears to be the same in many cases. When a large number of datapoints are below LoQ this can also have the effect that the median = minimum.

| HMO     | Milk Group | Study Arm | Postmenstrual Age (weeks) | N | HMO Concentration (mg/L) |       |       |       |          |                  |                  |
|---------|------------|-----------|---------------------------|---|--------------------------|-------|-------|-------|----------|------------------|------------------|
|         |            |           |                           |   | min *                    | max   | mean  | sd    | median * | Quartile 1 (25%) | Quartile 3 (75%) |
| LNFP-II | G2         | PRE-TERM  | 48                        | 1 | 1201                     | 1201  | 1201  | NA    | 1201     | 1201             | 1201             |
| LNFP-II | G2         | TERM      | 39                        | 1 | 1238                     | 1238  | 1238  | NA    | 1238     | 1238             | 1238             |
| LNFP-II | G2         | TERM      | 40                        | 5 | 1069                     | 1616  | 1301  | 204.7 | 1296     | 1186             | 1339             |
| LNFP-II | G2         | TERM      | 41                        | 4 | 901.1                    | 1884  | 1373  | 413.0 | 1353     | 1153             | 1572             |
| LNFP-II | G2         | TERM      | 42                        | 6 | 884.6                    | 1684  | 1463  | 311.0 | 1602     | 1393             | 1660             |
| LNFP-II | G2         | TERM      | 43                        | 5 | 947.7                    | 1565  | 1245  | 228.2 | 1268     | 1133             | 1310             |
| LNFP-II | G2         | TERM      | 44                        | 5 | 964.1                    | 1411  | 1150  | 188.4 | 1134     | 982.8            | 1257             |
| LNFP-II | G2         | TERM      | 45                        | 5 | 376.0                    | 1476  | 969.6 | 415.7 | 923.5    | 847.4            | 1225             |
| LNFP-II | G2         | TERM      | 46                        | 5 | 530.4                    | 1171  | 904.3 | 275.8 | 1038     | 697.1            | 1085             |
| LNFP-II | G2         | TERM      | 47                        | 4 | 597.7                    | 1272  | 916.0 | 346.9 | 897.4    | 629.5            | 1184             |
| LNFP-II | G3         | PRE-TERM  | 30                        | 1 | 17.50                    | 17.50 | 17.50 | NA    | 17.50    | 17.50            | 17.50            |
| LNFP-II | G3         | PRE-TERM  | 31                        | 1 | 17.50                    | 17.50 | 17.50 | NA    | 17.50    | 17.50            | 17.50            |
| LNFP-II | G3         | PRE-TERM  | 32                        | 1 | 17.50                    | 17.50 | 17.50 | NA    | 17.50    | 17.50            | 17.50            |
| LNFP-II | G3         | PRE-TERM  | 33                        | 1 | 17.50                    | 17.50 | 17.50 | NA    | 17.50    | 17.50            | 17.50            |
| LNFP-II | G3         | PRE-TERM  | 34                        | 1 | 17.50                    | 17.50 | 17.50 | NA    | 17.50    | 17.50            | 17.50            |
| LNFP-II | G3         | PRE-TERM  | 35                        | 1 | 17.50                    | 17.50 | 17.50 | NA    | 17.50    | 17.50            | 17.50            |
| LNFP-II | G3         | PRE-TERM  | 36                        | 1 | 17.50                    | 17.50 | 17.50 | NA    | 17.50    | 17.50            | 17.50            |
| LNFP-II | G3         | PRE-TERM  | 37                        | 1 | 17.50                    | 17.50 | 17.50 | NA    | 17.50    | 17.50            | 17.50            |
| LNFP-II | G3         | PRE-TERM  | 39                        | 1 | 17.50                    | 17.50 | 17.50 | NA    | 17.50    | 17.50            | 17.50            |
| LNFP-II | G3         | PRE-TERM  | 41                        | 1 | 17.50                    | 17.50 | 17.50 | NA    | 17.50    | 17.50            | 17.50            |
| LNFP-II | G3         | PRE-TERM  | 43                        | 1 | 17.50                    | 17.50 | 17.50 | NA    | 17.50    | 17.50            | 17.50            |
| LNFP-II | G3         | PRE-TERM  | 45                        | 1 | 17.50                    | 17.50 | 17.50 | NA    | 17.50    | 17.50            | 17.50            |
| LNFP-II | G3         | TERM      | 41                        | 1 | 17.50                    | 17.50 | 17.50 | NA    | 17.50    | 17.50            | 17.50            |
| LNFP-II | G3         | TERM      | 42                        | 1 | 17.50                    | 17.50 | 17.50 | NA    | 17.50    | 17.50            | 17.50            |
| LNFP-II | G3         | TERM      | 43                        | 1 | 17.50                    | 17.50 | 17.50 | NA    | 17.50    | 17.50            | 17.50            |
| LNFP-II | G3         | TERM      | 44                        | 1 | 17.50                    | 17.50 | 17.50 | NA    | 17.50    | 17.50            | 17.50            |
| LNFP-II | G3         | TERM      | 45                        | 1 | 17.50                    | 17.50 | 17.50 | NA    | 17.50    | 17.50            | 17.50            |
| LNFP-II | G3         | TERM      | 46                        | 1 | 17.50                    | 17.50 | 17.50 | NA    | 17.50    | 17.50            | 17.50            |
| LNFP-II | G3         | TERM      | 47                        | 1 | 17.50                    | 17.50 | 17.50 | NA    | 17.50    | 17.50            | 17.50            |
| LNFP-II | G3         | TERM      | 48                        | 1 | 17.50                    | 17.50 | 17.50 | NA    | 17.50    | 17.50            | 17.50            |
| LNFP-II | G4         | TERM      | 40                        | 1 | 17.50                    | 17.50 | 17.50 | NA    | 17.50    | 17.50            | 17.50            |
| LNFP-II | G4         | TERM      | 41                        | 1 | 17.50                    | 17.50 | 17.50 | NA    | 17.50    | 17.50            | 17.50            |
| LNFP-II | G4         | TERM      | 42                        | 1 | 17.50                    | 17.50 | 17.50 | NA    | 17.50    | 17.50            | 17.50            |
| LNFP-II | G4         | TERM      | 43                        | 1 | 17.50                    | 17.50 | 17.50 | NA    | 17.50    | 17.50            | 17.50            |
| LNFP-II | G4         | TERM      | 44                        | 1 | 17.50                    | 17.50 | 17.50 | NA    | 17.50    | 17.50            | 17.50            |
| LNFP-II | G4         | TERM      | 45                        | 1 | 17.50                    | 17.50 | 17.50 | NA    | 17.50    | 17.50            | 17.50            |

**Table S4 Concentration of Human Milk Oligosaccharides in Term or Preterm Milk At Specified Postmenstrual Age Separated By Milk Group**

\* When there are results below the method limit of quantification (LoQ) the result has been assigned value of  $0.5 \times \text{LoQ}$ , hence the minimum value appears to be the same in many cases. When a large number of datapoints are below LoQ this can also have the effect that the median = minimum.

| HMO      | Milk Group | Study Arm | Postmenstrual Age (weeks) | N  | HMO Concentration (mg/L) |       |       |       |          |                  |                  |
|----------|------------|-----------|---------------------------|----|--------------------------|-------|-------|-------|----------|------------------|------------------|
|          |            |           |                           |    | min *                    | max   | mean  | sd    | median * | Quartile 1 (25%) | Quartile 3 (75%) |
| LNFP-II  | G4         | TERM      | 46                        | 1  | 17.50                    | 17.50 | 17.50 | NA    | 17.50    | 17.50            | 17.50            |
| LNFP-II  | G4         | TERM      | 47                        | 1  | 17.50                    | 17.50 | 17.50 | NA    | 17.50    | 17.50            | 17.50            |
| LNFP-III | G1         | PRE-TERM  | 30                        | 7  | 55.72                    | 404.4 | 333.0 | 125.4 | 378.3    | 347.1            | 399.2            |
| LNFP-III | G1         | PRE-TERM  | 31                        | 9  | 35.70                    | 464.9 | 285.5 | 123.4 | 305.5    | 276.7            | 353.2            |
| LNFP-III | G1         | PRE-TERM  | 32                        | 13 | 40.94                    | 480.4 | 252.8 | 114.0 | 244.7    | 188.8            | 290.5            |
| LNFP-III | G1         | PRE-TERM  | 33                        | 18 | 49.93                    | 430.7 | 248.1 | 114.4 | 242.2    | 161.9            | 344.4            |
| LNFP-III | G1         | PRE-TERM  | 34                        | 19 | 52.14                    | 506.1 | 275.1 | 123.0 | 262.9    | 214.1            | 332.6            |
| LNFP-III | G1         | PRE-TERM  | 35                        | 18 | 49.25                    | 491.8 | 274.0 | 115.5 | 284.2    | 215.3            | 336.3            |
| LNFP-III | G1         | PRE-TERM  | 36                        | 19 | 17.50                    | 482.4 | 270.2 | 115.4 | 274.0    | 206.2            | 357.7            |
| LNFP-III | G1         | PRE-TERM  | 37                        | 18 | 52.97                    | 546.0 | 306.1 | 124.0 | 302.9    | 211.4            | 396.0            |
| LNFP-III | G1         | PRE-TERM  | 38                        | 11 | 55.78                    | 615.4 | 316.0 | 172.0 | 282.7    | 211.2            | 420.8            |
| LNFP-III | G1         | PRE-TERM  | 39                        | 16 | 60.20                    | 847.4 | 355.6 | 200.8 | 345.0    | 238.1            | 414.2            |
| LNFP-III | G1         | PRE-TERM  | 40                        | 7  | 175.8                    | 534.0 | 308.4 | 136.9 | 262.9    | 209.5            | 383.6            |
| LNFP-III | G1         | PRE-TERM  | 41                        | 12 | 50.94                    | 653.0 | 417.8 | 178.9 | 437.8    | 354.8            | 540.8            |
| LNFP-III | G1         | PRE-TERM  | 42                        | 6  | 177.7                    | 442.1 | 284.9 | 91.41 | 273.5    | 233.4            | 310.3            |
| LNFP-III | G1         | PRE-TERM  | 43                        | 10 | 74.13                    | 635.2 | 376.4 | 167.3 | 389.0    | 317.6            | 478.5            |
| LNFP-III | G1         | PRE-TERM  | 44                        | 5  | 204.0                    | 528.1 | 337.2 | 137.4 | 284.1    | 238.8            | 431.0            |
| LNFP-III | G1         | PRE-TERM  | 45                        | 9  | 89.27                    | 599.0 | 348.5 | 191.7 | 358.2    | 204.7            | 543.4            |
| LNFP-III | G1         | PRE-TERM  | 46                        | 6  | 187.7                    | 513.1 | 322.5 | 124.1 | 322.1    | 220.8            | 382.6            |
| LNFP-III | G1         | PRE-TERM  | 47                        | 3  | 140.7                    | 774.0 | 387.5 | 339.0 | 247.7    | 194.2            | 510.9            |
| LNFP-III | G1         | PRE-TERM  | 48                        | 4  | 266.6                    | 338.5 | 295.8 | 34.59 | 289.0    | 268.2            | 316.5            |
| LNFP-III | G1         | TERM      | 38                        | 2  | 444.4                    | 477.8 | 461.1 | 23.62 | 461.1    | 452.8            | 469.5            |
| LNFP-III | G1         | TERM      | 39                        | 9  | 192.5                    | 476.1 | 369.1 | 102.9 | 385.9    | 309.8            | 459.1            |
| LNFP-III | G1         | TERM      | 40                        | 13 | 163.3                    | 434.1 | 334.3 | 87.62 | 364.1    | 315.5            | 394.7            |
| LNFP-III | G1         | TERM      | 41                        | 21 | 169.8                    | 490.3 | 305.3 | 94.34 | 307.3    | 229.9            | 348.4            |
| LNFP-III | G1         | TERM      | 42                        | 21 | 153.7                    | 432.9 | 270.1 | 75.96 | 272.1    | 222.5            | 301.8            |
| LNFP-III | G1         | TERM      | 43                        | 21 | 165.5                    | 575.0 | 277.7 | 102.4 | 246.0    | 216.6            | 294.9            |
| LNFP-III | G1         | TERM      | 44                        | 20 | 153.3                    | 438.5 | 259.7 | 69.98 | 249.8    | 211.9            | 308.8            |
| LNFP-III | G1         | TERM      | 45                        | 21 | 17.50                    | 498.9 | 281.7 | 100.4 | 280.1    | 236.4            | 335.9            |
| LNFP-III | G1         | TERM      | 46                        | 17 | 108.0                    | 508.6 | 299.3 | 103.8 | 280.7    | 229.6            | 373.3            |
| LNFP-III | G1         | TERM      | 47                        | 12 | 164.2                    | 526.2 | 284.5 | 96.54 | 248.5    | 230.9            | 344.7            |
| LNFP-III | G1         | TERM      | 48                        | 6  | 209.5                    | 398.2 | 282.0 | 69.29 | 280.3    | 229.6            | 303.3            |
| LNFP-III | G2         | PRE-TERM  | 29                        | 1  | 682.1                    | 682.1 | 682.1 | NA    | 682.1    | 682.1            | 682.1            |
| LNFP-III | G2         | PRE-TERM  | 30                        | 2  | 558.9                    | 569.3 | 564.1 | 7.383 | 564.1    | 561.5            | 566.7            |
| LNFP-III | G2         | PRE-TERM  | 31                        | 2  | 465.2                    | 640.0 | 552.6 | 123.6 | 552.6    | 508.9            | 596.3            |
| LNFP-III | G2         | PRE-TERM  | 32                        | 3  | 251.7                    | 654.7 | 479.5 | 206.6 | 532.2    | 391.9            | 593.5            |



**Table S4 Concentration of Human Milk Oligosaccharides in Term or Preterm Milk At Specified Postmenstrual Age Separated By Milk Group**

\* When there are results below the method limit of quantification (LoQ) the result has been assigned value of  $0.5 \times \text{LoQ}$ , hence the minimum value appears to be the same in many cases. When a large number of datapoints are below LoQ this can also have the effect that the median = minimum.

| HMO      | Milk Group | Study Arm | Postmenstrual Age (weeks) | N | HMO Concentration (mg/L) |       |       |       |          |                  |                  |
|----------|------------|-----------|---------------------------|---|--------------------------|-------|-------|-------|----------|------------------|------------------|
|          |            |           |                           |   | min *                    | max   | mean  | sd    | median * | Quartile 1 (25%) | Quartile 3 (75%) |
| LNFP-III | G2         | PRE-TERM  | 33                        | 5 | 230.6                    | 727.3 | 518.5 | 209.1 | 504.4    | 416.8            | 713.1            |
| LNFP-III | G2         | PRE-TERM  | 34                        | 5 | 209.6                    | 779.2 | 494.4 | 253.6 | 409.1    | 331.9            | 742.0            |
| LNFP-III | G2         | PRE-TERM  | 35                        | 5 | 255.7                    | 733.6 | 450.3 | 177.1 | 445.5    | 365.1            | 451.6            |
| LNFP-III | G2         | PRE-TERM  | 36                        | 5 | 237.8                    | 711.8 | 432.6 | 179.3 | 426.4    | 324.2            | 463.0            |
| LNFP-III | G2         | PRE-TERM  | 37                        | 4 | 394.8                    | 767.7 | 544.3 | 158.3 | 507.4    | 472.4            | 579.3            |
| LNFP-III | G2         | PRE-TERM  | 38                        | 4 | 243.5                    | 543.6 | 371.8 | 126.3 | 350.1    | 307.2            | 414.7            |
| LNFP-III | G2         | PRE-TERM  | 39                        | 3 | 251.4                    | 432.6 | 326.7 | 94.38 | 296.2    | 273.8            | 364.4            |
| LNFP-III | G2         | PRE-TERM  | 40                        | 3 | 238.6                    | 469.7 | 327.2 | 124.6 | 273.4    | 256.0            | 371.6            |
| LNFP-III | G2         | PRE-TERM  | 41                        | 2 | 354.4                    | 616.5 | 485.5 | 185.4 | 485.5    | 419.9            | 551.0            |
| LNFP-III | G2         | PRE-TERM  | 42                        | 3 | 228.7                    | 526.8 | 353.9 | 154.7 | 306.1    | 267.4            | 416.5            |
| LNFP-III | G2         | PRE-TERM  | 43                        | 2 | 522.3                    | 552.8 | 537.6 | 21.54 | 537.6    | 530.0            | 545.2            |
| LNFP-III | G2         | PRE-TERM  | 44                        | 3 | 214.5                    | 472.4 | 315.4 | 137.8 | 259.4    | 237.0            | 365.9            |
| LNFP-III | G2         | PRE-TERM  | 45                        | 2 | 271.7                    | 354.6 | 313.1 | 58.62 | 313.1    | 292.4            | 333.8            |
| LNFP-III | G2         | PRE-TERM  | 46                        | 2 | 352.7                    | 750.3 | 551.5 | 281.1 | 551.5    | 452.1            | 650.9            |
| LNFP-III | G2         | PRE-TERM  | 48                        | 1 | 345.5                    | 345.5 | 345.5 | NA    | 345.5    | 345.5            | 345.5            |
| LNFP-III | G2         | TERM      | 39                        | 1 | 826.9                    | 826.9 | 826.9 | NA    | 826.9    | 826.9            | 826.9            |
| LNFP-III | G2         | TERM      | 40                        | 5 | 76.48                    | 685.9 | 488.0 | 242.2 | 590.7    | 474.8            | 611.8            |
| LNFP-III | G2         | TERM      | 41                        | 4 | 388.9                    | 515.2 | 463.7 | 53.35 | 475.2    | 450.8            | 488.1            |
| LNFP-III | G2         | TERM      | 42                        | 6 | 318.0                    | 525.0 | 400.5 | 86.04 | 369.2    | 338.0            | 462.9            |
| LNFP-III | G2         | TERM      | 43                        | 5 | 273.1                    | 494.3 | 341.8 | 90.95 | 294.0    | 290.7            | 356.7            |
| LNFP-III | G2         | TERM      | 44                        | 5 | 247.7                    | 428.0 | 338.6 | 69.15 | 336.1    | 302.7            | 378.4            |
| LNFP-III | G2         | TERM      | 45                        | 5 | 147.3                    | 499.8 | 358.4 | 129.7 | 394.5    | 354.7            | 395.6            |
| LNFP-III | G2         | TERM      | 46                        | 5 | 280.5                    | 461.6 | 349.8 | 71.14 | 319.1    | 312.8            | 375.0            |
| LNFP-III | G2         | TERM      | 47                        | 4 | 272.6                    | 493.6 | 361.7 | 96.31 | 340.2    | 302.3            | 399.6            |
| LNFP-III | G3         | PRE-TERM  | 30                        | 1 | 322.8                    | 322.8 | 322.8 | NA    | 322.8    | 322.8            | 322.8            |
| LNFP-III | G3         | PRE-TERM  | 31                        | 1 | 418.0                    | 418.0 | 418.0 | NA    | 418.0    | 418.0            | 418.0            |
| LNFP-III | G3         | PRE-TERM  | 32                        | 1 | 352.3                    | 352.3 | 352.3 | NA    | 352.3    | 352.3            | 352.3            |
| LNFP-III | G3         | PRE-TERM  | 33                        | 1 | 290.1                    | 290.1 | 290.1 | NA    | 290.1    | 290.1            | 290.1            |
| LNFP-III | G3         | PRE-TERM  | 34                        | 1 | 324.2                    | 324.2 | 324.2 | NA    | 324.2    | 324.2            | 324.2            |
| LNFP-III | G3         | PRE-TERM  | 35                        | 1 | 430.5                    | 430.5 | 430.5 | NA    | 430.5    | 430.5            | 430.5            |
| LNFP-III | G3         | PRE-TERM  | 36                        | 1 | 334.1                    | 334.1 | 334.1 | NA    | 334.1    | 334.1            | 334.1            |
| LNFP-III | G3         | PRE-TERM  | 37                        | 1 | 340.3                    | 340.3 | 340.3 | NA    | 340.3    | 340.3            | 340.3            |
| LNFP-III | G3         | PRE-TERM  | 39                        | 1 | 329.7                    | 329.7 | 329.7 | NA    | 329.7    | 329.7            | 329.7            |
| LNFP-III | G3         | PRE-TERM  | 41                        | 1 | 357.3                    | 357.3 | 357.3 | NA    | 357.3    | 357.3            | 357.3            |
| LNFP-III | G3         | PRE-TERM  | 43                        | 1 | 404.7                    | 404.7 | 404.7 | NA    | 404.7    | 404.7            | 404.7            |
| LNFP-III | G3         | PRE-TERM  | 45                        | 1 | 407.3                    | 407.3 | 407.3 | NA    | 407.3    | 407.3            | 407.3            |

**Table S4 Concentration of Human Milk Oligosaccharides in Term or Preterm Milk At Specified Postmenstrual Age Separated By Milk Group**

\* When there are results below the method limit of quantification (LoQ) the result has been assigned value of  $0.5 \times \text{LoQ}$ , hence the minimum value appears to be the same in many cases. When a large number of datapoints are below LoQ this can also have the effect that the median = minimum.

| HMO      | Milk Group | Study Arm | Postmenstrual Age (weeks) | N  | HMO Concentration (mg/L) |       |       |       |          |                  |                  |
|----------|------------|-----------|---------------------------|----|--------------------------|-------|-------|-------|----------|------------------|------------------|
|          |            |           |                           |    | min *                    | max   | mean  | sd    | median * | Quartile 1 (25%) | Quartile 3 (75%) |
| LNFP-III | G3         | TERM      | 41                        | 1  | 329.2                    | 329.2 | 329.2 | NA    | 329.2    | 329.2            | 329.2            |
| LNFP-III | G3         | TERM      | 42                        | 1  | 262.9                    | 262.9 | 262.9 | NA    | 262.9    | 262.9            | 262.9            |
| LNFP-III | G3         | TERM      | 43                        | 1  | 219.7                    | 219.7 | 219.7 | NA    | 219.7    | 219.7            | 219.7            |
| LNFP-III | G3         | TERM      | 44                        | 1  | 238.9                    | 238.9 | 238.9 | NA    | 238.9    | 238.9            | 238.9            |
| LNFP-III | G3         | TERM      | 45                        | 1  | 202.2                    | 202.2 | 202.2 | NA    | 202.2    | 202.2            | 202.2            |
| LNFP-III | G3         | TERM      | 46                        | 1  | 196.3                    | 196.3 | 196.3 | NA    | 196.3    | 196.3            | 196.3            |
| LNFP-III | G3         | TERM      | 47                        | 1  | 190.9                    | 190.9 | 190.9 | NA    | 190.9    | 190.9            | 190.9            |
| LNFP-III | G3         | TERM      | 48                        | 1  | 262.5                    | 262.5 | 262.5 | NA    | 262.5    | 262.5            | 262.5            |
| LNFP-III | G4         | TERM      | 40                        | 1  | 1268                     | 1268  | 1268  | NA    | 1268     | 1268             | 1268             |
| LNFP-III | G4         | TERM      | 41                        | 1  | 1169                     | 1169  | 1169  | NA    | 1169     | 1169             | 1169             |
| LNFP-III | G4         | TERM      | 42                        | 1  | 911.0                    | 911.0 | 911.0 | NA    | 911.0    | 911.0            | 911.0            |
| LNFP-III | G4         | TERM      | 43                        | 1  | 823.9                    | 823.9 | 823.9 | NA    | 823.9    | 823.9            | 823.9            |
| LNFP-III | G4         | TERM      | 44                        | 1  | 714.0                    | 714.0 | 714.0 | NA    | 714.0    | 714.0            | 714.0            |
| LNFP-III | G4         | TERM      | 45                        | 1  | 786.1                    | 786.1 | 786.1 | NA    | 786.1    | 786.1            | 786.1            |
| LNFP-III | G4         | TERM      | 46                        | 1  | 703.6                    | 703.6 | 703.6 | NA    | 703.6    | 703.6            | 703.6            |
| LNFP-III | G4         | TERM      | 47                        | 1  | 569.7                    | 569.7 | 569.7 | NA    | 569.7    | 569.7            | 569.7            |
| LNFP-V   | G1         | PRE-TERM  | 30                        | 7  | 12.00                    | 140.4 | 39.58 | 47.66 | 12.00    | 12.00            | 44.35            |
| LNFP-V   | G1         | PRE-TERM  | 31                        | 9  | 12.00                    | 140.5 | 49.23 | 39.55 | 43.27    | 25.98            | 48.02            |
| LNFP-V   | G1         | PRE-TERM  | 32                        | 13 | 12.00                    | 123.0 | 41.26 | 36.21 | 26.19    | 12.00            | 58.17            |
| LNFP-V   | G1         | PRE-TERM  | 33                        | 18 | 12.00                    | 112.6 | 37.84 | 27.64 | 29.42    | 12.00            | 56.13            |
| LNFP-V   | G1         | PRE-TERM  | 34                        | 19 | 12.00                    | 108.5 | 47.58 | 31.82 | 39.99    | 18.59            | 66.41            |
| LNFP-V   | G1         | PRE-TERM  | 35                        | 18 | 12.00                    | 123.1 | 52.73 | 32.85 | 51.16    | 30.94            | 73.04            |
| LNFP-V   | G1         | PRE-TERM  | 36                        | 19 | 12.00                    | 121.4 | 49.64 | 34.29 | 50.05    | 12.00            | 73.91            |
| LNFP-V   | G1         | PRE-TERM  | 37                        | 18 | 12.00                    | 116.0 | 49.27 | 31.00 | 43.18    | 30.19            | 66.17            |
| LNFP-V   | G1         | PRE-TERM  | 38                        | 11 | 12.00                    | 109.0 | 38.29 | 33.60 | 33.31    | 12.00            | 49.35            |
| LNFP-V   | G1         | PRE-TERM  | 39                        | 16 | 12.00                    | 100.1 | 51.60 | 33.35 | 37.55    | 25.20            | 83.90            |
| LNFP-V   | G1         | PRE-TERM  | 40                        | 7  | 12.00                    | 105.7 | 51.95 | 41.44 | 28.20    | 18.58            | 90.29            |
| LNFP-V   | G1         | PRE-TERM  | 41                        | 12 | 12.00                    | 83.16 | 38.41 | 26.04 | 33.62    | 12.00            | 58.71            |
| LNFP-V   | G1         | PRE-TERM  | 42                        | 6  | 12.00                    | 85.92 | 46.87 | 38.46 | 42.80    | 12.00            | 82.66            |
| LNFP-V   | G1         | PRE-TERM  | 43                        | 10 | 12.00                    | 85.62 | 44.58 | 23.76 | 44.10    | 30.56            | 59.72            |
| LNFP-V   | G1         | PRE-TERM  | 44                        | 5  | 12.00                    | 72.64 | 48.85 | 27.80 | 61.74    | 26.56            | 71.31            |
| LNFP-V   | G1         | PRE-TERM  | 45                        | 9  | 12.00                    | 122.5 | 44.70 | 33.14 | 40.12    | 27.59            | 53.26            |
| LNFP-V   | G1         | PRE-TERM  | 46                        | 6  | 12.00                    | 80.64 | 43.67 | 30.01 | 45.27    | 16.03            | 65.72            |
| LNFP-V   | G1         | PRE-TERM  | 47                        | 3  | 12.00                    | 47.17 | 31.89 | 18.03 | 36.51    | 24.26            | 41.84            |
| LNFP-V   | G1         | PRE-TERM  | 48                        | 4  | 12.00                    | 68.59 | 40.66 | 24.95 | 41.02    | 25.12            | 56.56            |
| LNFP-V   | G1         | TERM      | 38                        | 2  | 12.00                    | 30.70 | 21.35 | 13.23 | 21.35    | 16.68            | 26.03            |

**Table S4 Concentration of Human Milk Oligosaccharides in Term or Preterm Milk At Specified Postmenstrual Age Separated By Milk Group**

\* When there are results below the method limit of quantification (LoQ) the result has been assigned value of  $0.5 \times \text{LoQ}$ , hence the minimum value appears to be the same in many cases. When a large number of datapoints are below LoQ this can also have the effect that the median = minimum.

| HMO    | Milk Group | Study Arm | Postmenstrual Age (weeks) | N  | HMO Concentration (mg/L) |       |       |       |          |                  |                  |
|--------|------------|-----------|---------------------------|----|--------------------------|-------|-------|-------|----------|------------------|------------------|
|        |            |           |                           |    | min *                    | max   | mean  | sd    | median * | Quartile 1 (25%) | Quartile 3 (75%) |
| LNFP-V | G1         | TERM      | 39                        | 9  | 12.00                    | 72.60 | 27.36 | 22.16 | 12.00    | 12.00            | 36.05            |
| LNFP-V | G1         | TERM      | 40                        | 13 | 12.00                    | 66.46 | 37.07 | 19.47 | 39.71    | 24.13            | 54.21            |
| LNFP-V | G1         | TERM      | 41                        | 21 | 12.00                    | 349.1 | 56.24 | 69.68 | 41.54    | 31.94            | 55.81            |
| LNFP-V | G1         | TERM      | 42                        | 21 | 12.00                    | 75.41 | 43.41 | 18.92 | 43.48    | 27.84            | 56.79            |
| LNFP-V | G1         | TERM      | 43                        | 21 | 12.00                    | 83.09 | 37.96 | 23.66 | 37.15    | 12.00            | 53.37            |
| LNFP-V | G1         | TERM      | 44                        | 20 | 12.00                    | 84.50 | 39.06 | 20.97 | 35.48    | 25.16            | 57.29            |
| LNFP-V | G1         | TERM      | 45                        | 21 | 12.00                    | 94.30 | 40.42 | 24.22 | 36.17    | 25.64            | 56.51            |
| LNFP-V | G1         | TERM      | 46                        | 17 | 12.00                    | 105.3 | 42.23 | 26.95 | 36.20    | 12.00            | 56.43            |
| LNFP-V | G1         | TERM      | 47                        | 12 | 12.00                    | 101.5 | 39.96 | 30.98 | 31.02    | 12.00            | 58.46            |
| LNFP-V | G1         | TERM      | 48                        | 6  | 12.00                    | 38.23 | 18.38 | 10.85 | 12.00    | 12.00            | 21.02            |
| LNFP-V | G2         | PRE-TERM  | 29                        | 1  | 320.9                    | 320.9 | 320.9 | NA    | 320.9    | 320.9            | 320.9            |
| LNFP-V | G2         | PRE-TERM  | 30                        | 2  | 191.2                    | 289.0 | 240.1 | 69.11 | 240.1    | 215.7            | 264.5            |
| LNFP-V | G2         | PRE-TERM  | 31                        | 2  | 252.0                    | 266.9 | 259.5 | 10.52 | 259.5    | 255.7            | 263.2            |
| LNFP-V | G2         | PRE-TERM  | 32                        | 3  | 179.9                    | 286.3 | 233.3 | 53.19 | 233.8    | 206.8            | 260.0            |
| LNFP-V | G2         | PRE-TERM  | 33                        | 5  | 172.5                    | 300.2 | 250.8 | 52.36 | 261.9    | 227.2            | 292.2            |
| LNFP-V | G2         | PRE-TERM  | 34                        | 5  | 149.2                    | 317.8 | 244.9 | 81.40 | 292.9    | 163.8            | 301.0            |
| LNFP-V | G2         | PRE-TERM  | 35                        | 5  | 142.7                    | 359.5 | 252.4 | 97.83 | 296.5    | 154.2            | 309.0            |
| LNFP-V | G2         | PRE-TERM  | 36                        | 5  | 134.9                    | 363.8 | 257.7 | 91.86 | 268.3    | 200.4            | 321.2            |
| LNFP-V | G2         | PRE-TERM  | 37                        | 4  | 181.9                    | 285.4 | 234.8 | 46.62 | 235.9    | 204.4            | 266.3            |
| LNFP-V | G2         | PRE-TERM  | 38                        | 4  | 123.3                    | 309.0 | 206.7 | 76.65 | 197.2    | 176.2            | 227.6            |
| LNFP-V | G2         | PRE-TERM  | 39                        | 3  | 165.7                    | 299.1 | 225.8 | 67.66 | 212.6    | 189.2            | 255.9            |
| LNFP-V | G2         | PRE-TERM  | 40                        | 3  | 117.2                    | 207.0 | 175.9 | 50.89 | 203.6    | 160.4            | 205.3            |
| LNFP-V | G2         | PRE-TERM  | 41                        | 2  | 182.5                    | 328.8 | 255.7 | 103.5 | 255.7    | 219.1            | 292.3            |
| LNFP-V | G2         | PRE-TERM  | 42                        | 3  | 111.5                    | 165.1 | 137.1 | 26.87 | 134.9    | 123.2            | 150.0            |
| LNFP-V | G2         | PRE-TERM  | 43                        | 2  | 80.43                    | 200.7 | 140.5 | 85.02 | 140.5    | 110.5            | 170.6            |
| LNFP-V | G2         | PRE-TERM  | 44                        | 3  | 102.8                    | 194.4 | 138.5 | 48.98 | 118.5    | 110.6            | 156.4            |
| LNFP-V | G2         | PRE-TERM  | 45                        | 2  | 118.6                    | 408.7 | 263.6 | 205.1 | 263.6    | 191.1            | 336.2            |
| LNFP-V | G2         | PRE-TERM  | 46                        | 2  | 87.30                    | 202.6 | 145.0 | 81.56 | 145.0    | 116.1            | 173.8            |
| LNFP-V | G2         | PRE-TERM  | 48                        | 1  | 169.4                    | 169.4 | 169.4 | NA    | 169.4    | 169.4            | 169.4            |
| LNFP-V | G2         | TERM      | 39                        | 1  | 138.6                    | 138.6 | 138.6 | NA    | 138.6    | 138.6            | 138.6            |
| LNFP-V | G2         | TERM      | 40                        | 5  | 128.7                    | 191.8 | 166.2 | 28.44 | 181.0    | 143.0            | 186.6            |
| LNFP-V | G2         | TERM      | 41                        | 4  | 139.7                    | 226.3 | 185.2 | 44.53 | 187.5    | 150.8            | 221.9            |
| LNFP-V | G2         | TERM      | 42                        | 6  | 147.2                    | 247.0 | 194.7 | 35.99 | 200.2    | 170.1            | 210.3            |
| LNFP-V | G2         | TERM      | 43                        | 5  | 139.2                    | 202.6 | 175.5 | 25.73 | 173.2    | 165.2            | 197.5            |
| LNFP-V | G2         | TERM      | 44                        | 5  | 119.8                    | 228.2 | 164.4 | 41.77 | 154.3    | 140.1            | 179.4            |
| LNFP-V | G2         | TERM      | 45                        | 5  | 46.89                    | 226.4 | 135.0 | 65.02 | 142.8    | 111.1            | 148.0            |

**Table S4 Concentration of Human Milk Oligosaccharides in Term or Preterm Milk At Specified Postmenstrual Age Separated By Milk Group**

\* When there are results below the method limit of quantification (LoQ) the result has been assigned value of  $0.5 \times \text{LoQ}$ , hence the minimum value appears to be the same in many cases. When a large number of datapoints are below LoQ this can also have the effect that the median = minimum.

| HMO    | Milk Group | Study Arm | Postmenstrual Age (weeks) | N  | HMO Concentration (mg/L) |       |       |       |          |                  |                  |
|--------|------------|-----------|---------------------------|----|--------------------------|-------|-------|-------|----------|------------------|------------------|
|        |            |           |                           |    | min *                    | max   | mean  | sd    | median * | Quartile 1 (25%) | Quartile 3 (75%) |
| LNFP-V | G2         | TERM      | 46                        | 5  | 87.21                    | 162.9 | 121.4 | 32.92 | 124.8    | 89.82            | 142.2            |
| LNFP-V | G2         | TERM      | 47                        | 4  | 76.47                    | 196.7 | 127.7 | 51.00 | 118.8    | 99.64            | 146.9            |
| LNFP-V | G3         | PRE-TERM  | 30                        | 1  | 12.00                    | 12.00 | 12.00 | NA    | 12.00    | 12.00            | 12.00            |
| LNFP-V | G3         | PRE-TERM  | 31                        | 1  | 12.00                    | 12.00 | 12.00 | NA    | 12.00    | 12.00            | 12.00            |
| LNFP-V | G3         | PRE-TERM  | 32                        | 1  | 24.37                    | 24.37 | 24.37 | NA    | 24.37    | 24.37            | 24.37            |
| LNFP-V | G3         | PRE-TERM  | 33                        | 1  | 12.00                    | 12.00 | 12.00 | NA    | 12.00    | 12.00            | 12.00            |
| LNFP-V | G3         | PRE-TERM  | 34                        | 1  | 12.00                    | 12.00 | 12.00 | NA    | 12.00    | 12.00            | 12.00            |
| LNFP-V | G3         | PRE-TERM  | 35                        | 1  | 12.00                    | 12.00 | 12.00 | NA    | 12.00    | 12.00            | 12.00            |
| LNFP-V | G3         | PRE-TERM  | 36                        | 1  | 12.00                    | 12.00 | 12.00 | NA    | 12.00    | 12.00            | 12.00            |
| LNFP-V | G3         | PRE-TERM  | 37                        | 1  | 12.00                    | 12.00 | 12.00 | NA    | 12.00    | 12.00            | 12.00            |
| LNFP-V | G3         | PRE-TERM  | 39                        | 1  | 12.00                    | 12.00 | 12.00 | NA    | 12.00    | 12.00            | 12.00            |
| LNFP-V | G3         | PRE-TERM  | 41                        | 1  | 26.89                    | 26.89 | 26.89 | NA    | 26.89    | 26.89            | 26.89            |
| LNFP-V | G3         | PRE-TERM  | 43                        | 1  | 25.61                    | 25.61 | 25.61 | NA    | 25.61    | 25.61            | 25.61            |
| LNFP-V | G3         | PRE-TERM  | 45                        | 1  | 28.52                    | 28.52 | 28.52 | NA    | 28.52    | 28.52            | 28.52            |
| LNFP-V | G3         | TERM      | 41                        | 1  | 25.88                    | 25.88 | 25.88 | NA    | 25.88    | 25.88            | 25.88            |
| LNFP-V | G3         | TERM      | 42                        | 1  | 12.00                    | 12.00 | 12.00 | NA    | 12.00    | 12.00            | 12.00            |
| LNFP-V | G3         | TERM      | 43                        | 1  | 12.00                    | 12.00 | 12.00 | NA    | 12.00    | 12.00            | 12.00            |
| LNFP-V | G3         | TERM      | 44                        | 1  | 12.00                    | 12.00 | 12.00 | NA    | 12.00    | 12.00            | 12.00            |
| LNFP-V | G3         | TERM      | 45                        | 1  | 12.00                    | 12.00 | 12.00 | NA    | 12.00    | 12.00            | 12.00            |
| LNFP-V | G3         | TERM      | 46                        | 1  | 12.00                    | 12.00 | 12.00 | NA    | 12.00    | 12.00            | 12.00            |
| LNFP-V | G3         | TERM      | 47                        | 1  | 12.00                    | 12.00 | 12.00 | NA    | 12.00    | 12.00            | 12.00            |
| LNFP-V | G3         | TERM      | 48                        | 1  | 12.00                    | 12.00 | 12.00 | NA    | 12.00    | 12.00            | 12.00            |
| LNFP-V | G4         | TERM      | 40                        | 1  | 203.7                    | 203.7 | 203.7 | NA    | 203.7    | 203.7            | 203.7            |
| LNFP-V | G4         | TERM      | 41                        | 1  | 268.1                    | 268.1 | 268.1 | NA    | 268.1    | 268.1            | 268.1            |
| LNFP-V | G4         | TERM      | 42                        | 1  | 127.3                    | 127.3 | 127.3 | NA    | 127.3    | 127.3            | 127.3            |
| LNFP-V | G4         | TERM      | 43                        | 1  | 140.0                    | 140.0 | 140.0 | NA    | 140.0    | 140.0            | 140.0            |
| LNFP-V | G4         | TERM      | 44                        | 1  | 103.6                    | 103.6 | 103.6 | NA    | 103.6    | 103.6            | 103.6            |
| LNFP-V | G4         | TERM      | 45                        | 1  | 139.8                    | 139.8 | 139.8 | NA    | 139.8    | 139.8            | 139.8            |
| LNFP-V | G4         | TERM      | 46                        | 1  | 102.4                    | 102.4 | 102.4 | NA    | 102.4    | 102.4            | 102.4            |
| LNFP-V | G4         | TERM      | 47                        | 1  | 119.7                    | 119.7 | 119.7 | NA    | 119.7    | 119.7            | 119.7            |
| LNnDFH | G1         | PRE-TERM  | 30                        | 7  | 14.00                    | 110.4 | 46.87 | 33.45 | 41.42    | 22.90            | 58.24            |
| LNnDFH | G1         | PRE-TERM  | 31                        | 9  | 14.00                    | 76.33 | 36.41 | 25.68 | 33.79    | 14.00            | 50.41            |
| LNnDFH | G1         | PRE-TERM  | 32                        | 13 | 14.00                    | 65.59 | 25.08 | 18.20 | 14.00    | 14.00            | 39.02            |
| LNnDFH | G1         | PRE-TERM  | 33                        | 18 | 14.00                    | 83.93 | 20.04 | 17.19 | 14.00    | 14.00            | 14.00            |
| LNnDFH | G1         | PRE-TERM  | 34                        | 19 | 14.00                    | 120.6 | 23.93 | 25.00 | 14.00    | 14.00            | 21.52            |
| LNnDFH | G1         | PRE-TERM  | 35                        | 18 | 14.00                    | 58.17 | 22.39 | 14.97 | 14.00    | 14.00            | 26.59            |

**Table S4 Concentration of Human Milk Oligosaccharides in Term or Preterm Milk At Specified Postmenstrual Age Separated By Milk Group**

\* When there are results below the method limit of quantification (LoQ) the result has been assigned value of  $0.5 \times \text{LoQ}$ , hence the minimum value appears to be the same in many cases. When a large number of datapoints are below LoQ this can also have the effect that the median = minimum.

| HMO    | Milk Group | Study Arm | Postmenstrual Age (weeks) | N  | HMO Concentration (mg/L) |       |       |       |          |                  |                  |
|--------|------------|-----------|---------------------------|----|--------------------------|-------|-------|-------|----------|------------------|------------------|
|        |            |           |                           |    | min *                    | max   | mean  | sd    | median * | Quartile 1 (25%) | Quartile 3 (75%) |
| LNnDFH | G1         | PRE-TERM  | 36                        | 19 | 14.00                    | 47.73 | 18.11 | 10.01 | 14.00    | 14.00            | 14.00            |
| LNnDFH | G1         | PRE-TERM  | 37                        | 18 | 14.00                    | 183.2 | 27.90 | 39.76 | 14.00    | 14.00            | 24.94            |
| LNnDFH | G1         | PRE-TERM  | 38                        | 11 | 14.00                    | 97.37 | 32.34 | 32.42 | 14.00    | 14.00            | 37.91            |
| LNnDFH | G1         | PRE-TERM  | 39                        | 16 | 14.00                    | 107.7 | 28.54 | 26.18 | 14.00    | 14.00            | 34.17            |
| LNnDFH | G1         | PRE-TERM  | 40                        | 7  | 14.00                    | 30.88 | 18.50 | 7.720 | 14.00    | 14.00            | 21.33            |
| LNnDFH | G1         | PRE-TERM  | 41                        | 12 | 14.00                    | 85.19 | 39.11 | 27.29 | 34.29    | 14.00            | 59.93            |
| LNnDFH | G1         | PRE-TERM  | 42                        | 6  | 14.00                    | 46.53 | 25.77 | 13.99 | 21.67    | 14.00            | 34.88            |
| LNnDFH | G1         | PRE-TERM  | 43                        | 10 | 14.00                    | 75.44 | 31.15 | 22.17 | 21.79    | 14.00            | 39.02            |
| LNnDFH | G1         | PRE-TERM  | 44                        | 5  | 14.00                    | 67.08 | 33.41 | 21.88 | 33.20    | 14.00            | 38.76            |
| LNnDFH | G1         | PRE-TERM  | 45                        | 9  | 14.00                    | 67.12 | 33.84 | 20.95 | 30.74    | 14.00            | 49.84            |
| LNnDFH | G1         | PRE-TERM  | 46                        | 6  | 14.00                    | 54.35 | 29.56 | 17.88 | 25.75    | 14.00            | 42.03            |
| LNnDFH | G1         | PRE-TERM  | 47                        | 3  | 14.00                    | 105.1 | 44.36 | 52.59 | 14.00    | 14.00            | 59.54            |
| LNnDFH | G1         | PRE-TERM  | 48                        | 4  | 14.00                    | 55.46 | 32.91 | 22.04 | 31.09    | 14.00            | 50.00            |
| LNnDFH | G1         | TERM      | 38                        | 2  | 50.53                    | 106.3 | 78.39 | 39.40 | 78.39    | 64.46            | 92.32            |
| LNnDFH | G1         | TERM      | 39                        | 9  | 14.00                    | 181.8 | 52.25 | 56.69 | 28.53    | 14.00            | 77.61            |
| LNnDFH | G1         | TERM      | 40                        | 13 | 14.00                    | 172.8 | 56.46 | 46.95 | 33.46    | 29.71            | 76.91            |
| LNnDFH | G1         | TERM      | 41                        | 21 | 14.00                    | 110.0 | 28.98 | 26.60 | 14.00    | 14.00            | 30.45            |
| LNnDFH | G1         | TERM      | 42                        | 21 | 14.00                    | 52.71 | 24.89 | 13.80 | 14.00    | 14.00            | 34.89            |
| LNnDFH | G1         | TERM      | 43                        | 21 | 14.00                    | 77.46 | 26.39 | 18.17 | 14.00    | 14.00            | 41.96            |
| LNnDFH | G1         | TERM      | 44                        | 20 | 14.00                    | 85.76 | 22.72 | 18.46 | 14.00    | 14.00            | 17.69            |
| LNnDFH | G1         | TERM      | 45                        | 21 | 14.00                    | 132.3 | 30.41 | 32.51 | 14.00    | 14.00            | 33.10            |
| LNnDFH | G1         | TERM      | 46                        | 17 | 14.00                    | 94.89 | 26.60 | 23.19 | 14.00    | 14.00            | 36.06            |
| LNnDFH | G1         | TERM      | 47                        | 12 | 14.00                    | 85.75 | 29.96 | 23.81 | 21.48    | 14.00            | 30.40            |
| LNnDFH | G1         | TERM      | 48                        | 6  | 14.00                    | 70.18 | 26.24 | 22.61 | 14.00    | 14.00            | 26.94            |
| LNnDFH | G2         | PRE-TERM  | 29                        | 1  | 543.1                    | 543.1 | 543.1 | NA    | 543.1    | 543.1            | 543.1            |
| LNnDFH | G2         | PRE-TERM  | 30                        | 2  | 14.00                    | 299.7 | 156.8 | 202.0 | 156.8    | 85.42            | 228.3            |
| LNnDFH | G2         | PRE-TERM  | 31                        | 2  | 14.00                    | 333.0 | 173.5 | 225.6 | 173.5    | 93.76            | 253.3            |
| LNnDFH | G2         | PRE-TERM  | 32                        | 3  | 14.00                    | 195.3 | 74.44 | 104.7 | 14.00    | 14.00            | 104.7            |
| LNnDFH | G2         | PRE-TERM  | 33                        | 5  | 14.00                    | 430.0 | 160.7 | 170.5 | 159.1    | 14.00            | 186.3            |
| LNnDFH | G2         | PRE-TERM  | 34                        | 5  | 62.05                    | 196.9 | 128.1 | 59.85 | 145.0    | 69.53            | 167.1            |
| LNnDFH | G2         | PRE-TERM  | 35                        | 5  | 14.00                    | 185.4 | 107.2 | 75.38 | 77.51    | 74.52            | 184.6            |
| LNnDFH | G2         | PRE-TERM  | 36                        | 5  | 14.00                    | 156.3 | 74.48 | 53.66 | 72.38    | 42.68            | 87.06            |
| LNnDFH | G2         | PRE-TERM  | 37                        | 4  | 14.00                    | 138.4 | 84.01 | 51.61 | 91.83    | 70.38            | 105.5            |
| LNnDFH | G2         | PRE-TERM  | 38                        | 4  | 14.00                    | 119.8 | 78.65 | 47.76 | 90.40    | 57.34            | 111.7            |
| LNnDFH | G2         | PRE-TERM  | 39                        | 3  | 14.00                    | 65.02 | 42.84 | 26.15 | 49.49    | 31.74            | 57.25            |
| LNnDFH | G2         | PRE-TERM  | 40                        | 3  | 55.32                    | 115.8 | 87.31 | 30.40 | 90.81    | 73.07            | 103.3            |

**Table S4 Concentration of Human Milk Oligosaccharides in Term or Preterm Milk At Specified Postmenstrual Age Separated By Milk Group**

\* When there are results below the method limit of quantification (LoQ) the result has been assigned value of  $0.5 \times \text{LoQ}$ , hence the minimum value appears to be the same in many cases. When a large number of datapoints are below LoQ this can also have the effect that the median = minimum.

| HMO    | Milk Group | Study Arm | Postmenstrual Age (weeks) | N | HMO Concentration (mg/L) |       |       |        |          |                  |                  |
|--------|------------|-----------|---------------------------|---|--------------------------|-------|-------|--------|----------|------------------|------------------|
|        |            |           |                           |   | min *                    | max   | mean  | sd     | median * | Quartile 1 (25%) | Quartile 3 (75%) |
| LNnDFH | G2         | PRE-TERM  | 41                        | 2 | 14.00                    | 14.00 | 14.00 | 0.0000 | 14.00    | 14.00            | 14.00            |
| LNnDFH | G2         | PRE-TERM  | 42                        | 3 | 14.00                    | 125.7 | 75.13 | 56.58  | 85.71    | 49.85            | 105.7            |
| LNnDFH | G2         | PRE-TERM  | 43                        | 2 | 14.00                    | 14.00 | 14.00 | 0.0000 | 14.00    | 14.00            | 14.00            |
| LNnDFH | G2         | PRE-TERM  | 44                        | 3 | 14.00                    | 109.1 | 66.50 | 48.33  | 76.39    | 45.19            | 92.76            |
| LNnDFH | G2         | PRE-TERM  | 45                        | 2 | 14.00                    | 14.00 | 14.00 | 0.0000 | 14.00    | 14.00            | 14.00            |
| LNnDFH | G2         | PRE-TERM  | 46                        | 2 | 78.60                    | 733.1 | 405.8 | 462.8  | 405.8    | 242.2            | 569.5            |
| LNnDFH | G2         | PRE-TERM  | 48                        | 1 | 94.85                    | 94.85 | 94.85 | NA     | 94.85    | 94.85            | 94.85            |
| LNnDFH | G2         | TERM      | 39                        | 1 | 14.00                    | 14.00 | 14.00 | NA     | 14.00    | 14.00            | 14.00            |
| LNnDFH | G2         | TERM      | 40                        | 5 | 14.00                    | 48.50 | 20.90 | 15.43  | 14.00    | 14.00            | 14.00            |
| LNnDFH | G2         | TERM      | 41                        | 4 | 14.00                    | 46.71 | 22.18 | 16.35  | 14.00    | 14.00            | 22.18            |
| LNnDFH | G2         | TERM      | 42                        | 6 | 14.00                    | 40.38 | 18.40 | 10.77  | 14.00    | 14.00            | 14.00            |
| LNnDFH | G2         | TERM      | 43                        | 5 | 14.00                    | 34.25 | 18.05 | 9.055  | 14.00    | 14.00            | 14.00            |
| LNnDFH | G2         | TERM      | 44                        | 5 | 14.00                    | 31.98 | 17.60 | 8.039  | 14.00    | 14.00            | 14.00            |
| LNnDFH | G2         | TERM      | 45                        | 5 | 14.00                    | 97.13 | 30.63 | 37.18  | 14.00    | 14.00            | 14.00            |
| LNnDFH | G2         | TERM      | 46                        | 5 | 14.00                    | 77.39 | 26.68 | 28.35  | 14.00    | 14.00            | 14.00            |
| LNnDFH | G2         | TERM      | 47                        | 4 | 14.00                    | 94.07 | 34.02 | 40.04  | 14.00    | 14.00            | 34.02            |
| LNnDFH | G3         | PRE-TERM  | 30                        | 1 | 14.00                    | 14.00 | 14.00 | NA     | 14.00    | 14.00            | 14.00            |
| LNnDFH | G3         | PRE-TERM  | 31                        | 1 | 28.06                    | 28.06 | 28.06 | NA     | 28.06    | 28.06            | 28.06            |
| LNnDFH | G3         | PRE-TERM  | 32                        | 1 | 14.00                    | 14.00 | 14.00 | NA     | 14.00    | 14.00            | 14.00            |
| LNnDFH | G3         | PRE-TERM  | 33                        | 1 | 14.00                    | 14.00 | 14.00 | NA     | 14.00    | 14.00            | 14.00            |
| LNnDFH | G3         | PRE-TERM  | 34                        | 1 | 14.00                    | 14.00 | 14.00 | NA     | 14.00    | 14.00            | 14.00            |
| LNnDFH | G3         | PRE-TERM  | 35                        | 1 | 14.00                    | 14.00 | 14.00 | NA     | 14.00    | 14.00            | 14.00            |
| LNnDFH | G3         | PRE-TERM  | 36                        | 1 | 14.00                    | 14.00 | 14.00 | NA     | 14.00    | 14.00            | 14.00            |
| LNnDFH | G3         | PRE-TERM  | 37                        | 1 | 14.00                    | 14.00 | 14.00 | NA     | 14.00    | 14.00            | 14.00            |
| LNnDFH | G3         | PRE-TERM  | 39                        | 1 | 14.00                    | 14.00 | 14.00 | NA     | 14.00    | 14.00            | 14.00            |
| LNnDFH | G3         | PRE-TERM  | 41                        | 1 | 14.00                    | 14.00 | 14.00 | NA     | 14.00    | 14.00            | 14.00            |
| LNnDFH | G3         | PRE-TERM  | 43                        | 1 | 14.00                    | 14.00 | 14.00 | NA     | 14.00    | 14.00            | 14.00            |
| LNnDFH | G3         | PRE-TERM  | 45                        | 1 | 14.00                    | 14.00 | 14.00 | NA     | 14.00    | 14.00            | 14.00            |
| LNnDFH | G3         | TERM      | 41                        | 1 | 14.00                    | 14.00 | 14.00 | NA     | 14.00    | 14.00            | 14.00            |
| LNnDFH | G3         | TERM      | 42                        | 1 | 14.00                    | 14.00 | 14.00 | NA     | 14.00    | 14.00            | 14.00            |
| LNnDFH | G3         | TERM      | 43                        | 1 | 28.07                    | 28.07 | 28.07 | NA     | 28.07    | 28.07            | 28.07            |
| LNnDFH | G3         | TERM      | 44                        | 1 | 29.18                    | 29.18 | 29.18 | NA     | 29.18    | 29.18            | 29.18            |
| LNnDFH | G3         | TERM      | 45                        | 1 | 14.00                    | 14.00 | 14.00 | NA     | 14.00    | 14.00            | 14.00            |
| LNnDFH | G3         | TERM      | 46                        | 1 | 14.00                    | 14.00 | 14.00 | NA     | 14.00    | 14.00            | 14.00            |
| LNnDFH | G3         | TERM      | 47                        | 1 | 14.00                    | 14.00 | 14.00 | NA     | 14.00    | 14.00            | 14.00            |
| LNnDFH | G3         | TERM      | 48                        | 1 | 33.19                    | 33.19 | 33.19 | NA     | 33.19    | 33.19            | 33.19            |

**Table S4 Concentration of Human Milk Oligosaccharides in Term or Preterm Milk At Specified Postmenstrual Age Separated By Milk Group**

\* When there are results below the method limit of quantification (LoQ) the result has been assigned value of  $0.5 \times \text{LoQ}$ , hence the minimum value appears to be the same in many cases. When a large number of datapoints are below LoQ this can also have the effect that the median = minimum.

| HMO    | Milk Group | Study Arm | Postmenstrual Age (weeks) | N  | HMO Concentration (mg/L) |       |       |        |          |                  |                  |
|--------|------------|-----------|---------------------------|----|--------------------------|-------|-------|--------|----------|------------------|------------------|
|        |            |           |                           |    | min *                    | max   | mean  | sd     | median * | Quartile 1 (25%) | Quartile 3 (75%) |
| LNnDFH | G4         | TERM      | 40                        | 1  | 60.72                    | 60.72 | 60.72 | NA     | 60.72    | 60.72            | 60.72            |
| LNnDFH | G4         | TERM      | 41                        | 1  | 55.10                    | 55.10 | 55.10 | NA     | 55.10    | 55.10            | 55.10            |
| LNnDFH | G4         | TERM      | 42                        | 1  | 14.00                    | 14.00 | 14.00 | NA     | 14.00    | 14.00            | 14.00            |
| LNnDFH | G4         | TERM      | 43                        | 1  | 14.00                    | 14.00 | 14.00 | NA     | 14.00    | 14.00            | 14.00            |
| LNnDFH | G4         | TERM      | 44                        | 1  | 14.00                    | 14.00 | 14.00 | NA     | 14.00    | 14.00            | 14.00            |
| LNnDFH | G4         | TERM      | 45                        | 1  | 14.00                    | 14.00 | 14.00 | NA     | 14.00    | 14.00            | 14.00            |
| LNnDFH | G4         | TERM      | 46                        | 1  | 14.00                    | 14.00 | 14.00 | NA     | 14.00    | 14.00            | 14.00            |
| LNnDFH | G4         | TERM      | 47                        | 1  | 14.00                    | 14.00 | 14.00 | NA     | 14.00    | 14.00            | 14.00            |
| LNnFP  | G1         | PRE-TERM  | 30                        | 7  | 9.500                    | 89.76 | 25.08 | 29.39  | 9.500    | 9.500            | 23.89            |
| LNnFP  | G1         | PRE-TERM  | 31                        | 9  | 9.500                    | 50.62 | 16.94 | 13.82  | 9.500    | 9.500            | 21.61            |
| LNnFP  | G1         | PRE-TERM  | 32                        | 13 | 9.500                    | 50.34 | 12.64 | 11.33  | 9.500    | 9.500            | 9.500            |
| LNnFP  | G1         | PRE-TERM  | 33                        | 18 | 9.500                    | 59.82 | 15.09 | 13.48  | 9.500    | 9.500            | 9.500            |
| LNnFP  | G1         | PRE-TERM  | 34                        | 19 | 9.500                    | 61.67 | 14.16 | 12.37  | 9.500    | 9.500            | 9.500            |
| LNnFP  | G1         | PRE-TERM  | 35                        | 18 | 9.500                    | 60.47 | 15.60 | 12.95  | 9.500    | 9.500            | 17.45            |
| LNnFP  | G1         | PRE-TERM  | 36                        | 19 | 9.500                    | 55.24 | 14.51 | 11.16  | 9.500    | 9.500            | 14.75            |
| LNnFP  | G1         | PRE-TERM  | 37                        | 18 | 9.500                    | 57.65 | 14.87 | 11.97  | 9.500    | 9.500            | 16.65            |
| LNnFP  | G1         | PRE-TERM  | 38                        | 11 | 9.500                    | 32.68 | 14.48 | 9.093  | 9.500    | 9.500            | 14.55            |
| LNnFP  | G1         | PRE-TERM  | 39                        | 16 | 9.500                    | 60.19 | 18.58 | 16.84  | 9.500    | 9.500            | 21.89            |
| LNnFP  | G1         | PRE-TERM  | 40                        | 7  | 9.500                    | 9.500 | 9.500 | 0.0000 | 9.500    | 9.500            | 9.500            |
| LNnFP  | G1         | PRE-TERM  | 41                        | 12 | 9.500                    | 53.23 | 18.93 | 15.60  | 9.500    | 9.500            | 24.78            |
| LNnFP  | G1         | PRE-TERM  | 42                        | 6  | 9.500                    | 21.55 | 11.51 | 4.920  | 9.500    | 9.500            | 9.500            |
| LNnFP  | G1         | PRE-TERM  | 43                        | 10 | 9.500                    | 70.04 | 19.09 | 21.06  | 9.500    | 9.500            | 9.500            |
| LNnFP  | G1         | PRE-TERM  | 44                        | 5  | 9.500                    | 22.23 | 14.15 | 6.410  | 9.500    | 9.500            | 20.00            |
| LNnFP  | G1         | PRE-TERM  | 45                        | 9  | 9.500                    | 88.05 | 22.81 | 28.01  | 9.500    | 9.500            | 9.500            |
| LNnFP  | G1         | PRE-TERM  | 46                        | 6  | 9.500                    | 9.500 | 9.500 | 0.0000 | 9.500    | 9.500            | 9.500            |
| LNnFP  | G1         | PRE-TERM  | 47                        | 3  | 9.500                    | 56.14 | 25.05 | 26.93  | 9.500    | 9.500            | 32.82            |
| LNnFP  | G1         | PRE-TERM  | 48                        | 4  | 9.500                    | 23.76 | 13.06 | 7.128  | 9.500    | 9.500            | 13.06            |
| LNnFP  | G1         | TERM      | 38                        | 2  | 9.500                    | 19.80 | 14.65 | 7.285  | 14.65    | 12.08            | 17.23            |
| LNnFP  | G1         | TERM      | 39                        | 9  | 9.500                    | 38.38 | 15.90 | 12.70  | 9.500    | 9.500            | 9.500            |
| LNnFP  | G1         | TERM      | 40                        | 13 | 9.500                    | 32.19 | 13.76 | 8.262  | 9.500    | 9.500            | 9.500            |
| LNnFP  | G1         | TERM      | 41                        | 21 | 9.500                    | 23.38 | 11.29 | 4.513  | 9.500    | 9.500            | 9.500            |
| LNnFP  | G1         | TERM      | 42                        | 21 | 9.500                    | 29.19 | 11.03 | 4.974  | 9.500    | 9.500            | 9.500            |
| LNnFP  | G1         | TERM      | 43                        | 21 | 9.500                    | 66.17 | 15.40 | 13.09  | 9.500    | 9.500            | 19.20            |
| LNnFP  | G1         | TERM      | 44                        | 20 | 9.500                    | 21.51 | 11.17 | 4.095  | 9.500    | 9.500            | 9.500            |
| LNnFP  | G1         | TERM      | 45                        | 21 | 9.500                    | 20.46 | 11.42 | 4.072  | 9.500    | 9.500            | 9.500            |
| LNnFP  | G1         | TERM      | 46                        | 17 | 9.500                    | 22.09 | 12.80 | 5.295  | 9.500    | 9.500            | 19.20            |

**Table S4 Concentration of Human Milk Oligosaccharides in Term or Preterm Milk At Specified Postmenstrual Age Separated By Milk Group**

\* When there are results below the method limit of quantification (LoQ) the result has been assigned value of  $0.5 \times \text{LoQ}$ , hence the minimum value appears to be the same in many cases. When a large number of datapoints are below LoQ this can also have the effect that the median = minimum.

| HMO   | Milk Group | Study Arm | Postmenstrual Age (weeks) | N  | HMO Concentration (mg/L) |       |       |        |          |                  |                  |
|-------|------------|-----------|---------------------------|----|--------------------------|-------|-------|--------|----------|------------------|------------------|
|       |            |           |                           |    | min *                    | max   | mean  | sd     | median * | Quartile 1 (25%) | Quartile 3 (75%) |
| LNnFP | G1         | TERM      | 47                        | 12 | 9.500                    | 20.53 | 11.33 | 4.266  | 9.500    | 9.500            | 9.500            |
| LNnFP | G1         | TERM      | 48                        | 6  | 9.500                    | 9.500 | 9.500 | 0.0000 | 9.500    | 9.500            | 9.500            |
| LNnFP | G2         | PRE-TERM  | 29                        | 1  | 28.70                    | 28.70 | 28.70 | NA     | 28.70    | 28.70            | 28.70            |
| LNnFP | G2         | PRE-TERM  | 30                        | 2  | 25.44                    | 28.16 | 26.80 | 1.923  | 26.80    | 26.12            | 27.48            |
| LNnFP | G2         | PRE-TERM  | 31                        | 2  | 19.18                    | 27.56 | 23.37 | 5.923  | 23.37    | 21.28            | 25.46            |
| LNnFP | G2         | PRE-TERM  | 32                        | 3  | 9.500                    | 40.83 | 19.94 | 18.09  | 9.500    | 9.500            | 25.16            |
| LNnFP | G2         | PRE-TERM  | 33                        | 5  | 9.500                    | 40.34 | 25.95 | 12.33  | 25.09    | 19.47            | 35.34            |
| LNnFP | G2         | PRE-TERM  | 34                        | 5  | 9.500                    | 27.64 | 16.10 | 9.109  | 9.500    | 9.500            | 24.35            |
| LNnFP | G2         | PRE-TERM  | 35                        | 5  | 9.500                    | 44.75 | 21.80 | 14.61  | 19.24    | 9.500            | 26.02            |
| LNnFP | G2         | PRE-TERM  | 36                        | 5  | 9.500                    | 45.15 | 19.49 | 15.62  | 9.500    | 9.500            | 23.82            |
| LNnFP | G2         | PRE-TERM  | 37                        | 4  | 9.500                    | 22.87 | 12.84 | 6.683  | 9.500    | 9.500            | 12.84            |
| LNnFP | G2         | PRE-TERM  | 38                        | 4  | 9.500                    | 9.500 | 9.500 | 0.0000 | 9.500    | 9.500            | 9.500            |
| LNnFP | G2         | PRE-TERM  | 39                        | 3  | 9.500                    | 9.500 | 9.500 | 0.0000 | 9.500    | 9.500            | 9.500            |
| LNnFP | G2         | PRE-TERM  | 40                        | 3  | 9.500                    | 9.500 | 9.500 | 0.0000 | 9.500    | 9.500            | 9.500            |
| LNnFP | G2         | PRE-TERM  | 41                        | 2  | 9.500                    | 9.500 | 9.500 | 0.0000 | 9.500    | 9.500            | 9.500            |
| LNnFP | G2         | PRE-TERM  | 42                        | 3  | 9.500                    | 9.500 | 9.500 | 0.0000 | 9.500    | 9.500            | 9.500            |
| LNnFP | G2         | PRE-TERM  | 43                        | 2  | 9.500                    | 9.500 | 9.500 | 0.0000 | 9.500    | 9.500            | 9.500            |
| LNnFP | G2         | PRE-TERM  | 44                        | 3  | 9.500                    | 9.500 | 9.500 | 0.0000 | 9.500    | 9.500            | 9.500            |
| LNnFP | G2         | PRE-TERM  | 45                        | 2  | 9.500                    | 9.500 | 9.500 | 0.0000 | 9.500    | 9.500            | 9.500            |
| LNnFP | G2         | PRE-TERM  | 46                        | 2  | 9.500                    | 22.67 | 16.09 | 9.314  | 16.09    | 12.79            | 19.38            |
| LNnFP | G2         | PRE-TERM  | 48                        | 1  | 9.500                    | 9.500 | 9.500 | NA     | 9.500    | 9.500            | 9.500            |
| LNnFP | G2         | TERM      | 39                        | 1  | 49.07                    | 49.07 | 49.07 | NA     | 49.07    | 49.07            | 49.07            |
| LNnFP | G2         | TERM      | 40                        | 5  | 21.93                    | 56.56 | 37.85 | 15.08  | 32.67    | 27.31            | 50.79            |
| LNnFP | G2         | TERM      | 41                        | 4  | 9.500                    | 29.02 | 16.85 | 9.354  | 14.44    | 9.500            | 21.78            |
| LNnFP | G2         | TERM      | 42                        | 6  | 9.500                    | 32.89 | 19.12 | 8.889  | 19.63    | 12.01            | 22.60            |
| LNnFP | G2         | TERM      | 43                        | 5  | 9.500                    | 19.79 | 11.56 | 4.601  | 9.500    | 9.500            | 9.500            |
| LNnFP | G2         | TERM      | 44                        | 5  | 9.500                    | 20.88 | 11.78 | 5.091  | 9.500    | 9.500            | 9.500            |
| LNnFP | G2         | TERM      | 45                        | 5  | 9.500                    | 23.84 | 17.09 | 7.154  | 19.24    | 9.500            | 23.36            |
| LNnFP | G2         | TERM      | 46                        | 5  | 9.500                    | 23.61 | 14.74 | 7.212  | 9.500    | 9.500            | 21.60            |
| LNnFP | G2         | TERM      | 47                        | 4  | 9.500                    | 28.50 | 18.42 | 10.34  | 17.83    | 9.500            | 26.75            |
| LNnFP | G3         | PRE-TERM  | 30                        | 1  | 9.500                    | 9.500 | 9.500 | NA     | 9.500    | 9.500            | 9.500            |
| LNnFP | G3         | PRE-TERM  | 31                        | 1  | 9.500                    | 9.500 | 9.500 | NA     | 9.500    | 9.500            | 9.500            |
| LNnFP | G3         | PRE-TERM  | 32                        | 1  | 9.500                    | 9.500 | 9.500 | NA     | 9.500    | 9.500            | 9.500            |
| LNnFP | G3         | PRE-TERM  | 33                        | 1  | 9.500                    | 9.500 | 9.500 | NA     | 9.500    | 9.500            | 9.500            |
| LNnFP | G3         | PRE-TERM  | 34                        | 1  | 9.500                    | 9.500 | 9.500 | NA     | 9.500    | 9.500            | 9.500            |
| LNnFP | G3         | PRE-TERM  | 35                        | 1  | 9.500                    | 9.500 | 9.500 | NA     | 9.500    | 9.500            | 9.500            |



**Table S4 Concentration of Human Milk Oligosaccharides in Term or Preterm Milk At Specified Postmenstrual Age Separated By Milk Group**

\* When there are results below the method limit of quantification (LoQ) the result has been assigned value of  $0.5 \times \text{LoQ}$ , hence the minimum value appears to be the same in many cases. When a large number of datapoints are below LoQ this can also have the effect that the median = minimum.

| HMO   | Milk Group | Study Arm | Postmenstrual Age (weeks) | N  | HMO Concentration (mg/L) |       |       |       |          |                  |                  |
|-------|------------|-----------|---------------------------|----|--------------------------|-------|-------|-------|----------|------------------|------------------|
|       |            |           |                           |    | min *                    | max   | mean  | sd    | median * | Quartile 1 (25%) | Quartile 3 (75%) |
| LNnFP | G3         | PRE-TERM  | 36                        | 1  | 9.500                    | 9.500 | 9.500 | NA    | 9.500    | 9.500            | 9.500            |
| LNnFP | G3         | PRE-TERM  | 37                        | 1  | 9.500                    | 9.500 | 9.500 | NA    | 9.500    | 9.500            | 9.500            |
| LNnFP | G3         | PRE-TERM  | 39                        | 1  | 9.500                    | 9.500 | 9.500 | NA    | 9.500    | 9.500            | 9.500            |
| LNnFP | G3         | PRE-TERM  | 41                        | 1  | 9.500                    | 9.500 | 9.500 | NA    | 9.500    | 9.500            | 9.500            |
| LNnFP | G3         | PRE-TERM  | 43                        | 1  | 9.500                    | 9.500 | 9.500 | NA    | 9.500    | 9.500            | 9.500            |
| LNnFP | G3         | PRE-TERM  | 45                        | 1  | 9.500                    | 9.500 | 9.500 | NA    | 9.500    | 9.500            | 9.500            |
| LNnFP | G3         | TERM      | 41                        | 1  | 9.500                    | 9.500 | 9.500 | NA    | 9.500    | 9.500            | 9.500            |
| LNnFP | G3         | TERM      | 42                        | 1  | 9.500                    | 9.500 | 9.500 | NA    | 9.500    | 9.500            | 9.500            |
| LNnFP | G3         | TERM      | 43                        | 1  | 9.500                    | 9.500 | 9.500 | NA    | 9.500    | 9.500            | 9.500            |
| LNnFP | G3         | TERM      | 44                        | 1  | 9.500                    | 9.500 | 9.500 | NA    | 9.500    | 9.500            | 9.500            |
| LNnFP | G3         | TERM      | 45                        | 1  | 9.500                    | 9.500 | 9.500 | NA    | 9.500    | 9.500            | 9.500            |
| LNnFP | G3         | TERM      | 46                        | 1  | 9.500                    | 9.500 | 9.500 | NA    | 9.500    | 9.500            | 9.500            |
| LNnFP | G3         | TERM      | 47                        | 1  | 9.500                    | 9.500 | 9.500 | NA    | 9.500    | 9.500            | 9.500            |
| LNnFP | G3         | TERM      | 48                        | 1  | 9.500                    | 9.500 | 9.500 | NA    | 9.500    | 9.500            | 9.500            |
| LNnFP | G4         | TERM      | 40                        | 1  | 9.500                    | 9.500 | 9.500 | NA    | 9.500    | 9.500            | 9.500            |
| LNnFP | G4         | TERM      | 41                        | 1  | 9.500                    | 9.500 | 9.500 | NA    | 9.500    | 9.500            | 9.500            |
| LNnFP | G4         | TERM      | 42                        | 1  | 49.35                    | 49.35 | 49.35 | NA    | 49.35    | 49.35            | 49.35            |
| LNnFP | G4         | TERM      | 43                        | 1  | 40.04                    | 40.04 | 40.04 | NA    | 40.04    | 40.04            | 40.04            |
| LNnFP | G4         | TERM      | 44                        | 1  | 52.21                    | 52.21 | 52.21 | NA    | 52.21    | 52.21            | 52.21            |
| LNnFP | G4         | TERM      | 45                        | 1  | 56.13                    | 56.13 | 56.13 | NA    | 56.13    | 56.13            | 56.13            |
| LNnFP | G4         | TERM      | 46                        | 1  | 37.85                    | 37.85 | 37.85 | NA    | 37.85    | 37.85            | 37.85            |
| LNnFP | G4         | TERM      | 47                        | 1  | 23.06                    | 23.06 | 23.06 | NA    | 23.06    | 23.06            | 23.06            |
| LNnT  | G1         | PRE-TERM  | 30                        | 7  | 244.4                    | 546.3 | 367.2 | 109.2 | 338.0    | 290.4            | 430.5            |
| LNnT  | G1         | PRE-TERM  | 31                        | 9  | 145.7                    | 435.5 | 292.7 | 78.04 | 292.5    | 254.2            | 328.0            |
| LNnT  | G1         | PRE-TERM  | 32                        | 13 | 115.9                    | 413.1 | 244.8 | 74.79 | 235.4    | 211.0            | 287.1            |
| LNnT  | G1         | PRE-TERM  | 33                        | 18 | 84.09                    | 404.7 | 216.9 | 84.16 | 203.4    | 157.1            | 244.5            |
| LNnT  | G1         | PRE-TERM  | 34                        | 19 | 85.61                    | 383.2 | 222.8 | 94.64 | 212.7    | 166.2            | 270.9            |
| LNnT  | G1         | PRE-TERM  | 35                        | 18 | 76.18                    | 397.8 | 216.4 | 99.91 | 191.4    | 157.2            | 264.9            |
| LNnT  | G1         | PRE-TERM  | 36                        | 19 | 69.10                    | 341.2 | 199.1 | 74.84 | 217.5    | 155.6            | 253.1            |
| LNnT  | G1         | PRE-TERM  | 37                        | 18 | 69.59                    | 372.0 | 192.6 | 73.00 | 190.0    | 156.1            | 209.8            |
| LNnT  | G1         | PRE-TERM  | 38                        | 11 | 12.00                    | 314.7 | 155.5 | 95.88 | 138.0    | 93.47            | 205.3            |
| LNnT  | G1         | PRE-TERM  | 39                        | 16 | 77.62                    | 440.8 | 193.7 | 90.79 | 178.9    | 142.6            | 219.5            |
| LNnT  | G1         | PRE-TERM  | 40                        | 7  | 79.55                    | 211.5 | 165.9 | 54.08 | 202.3    | 131.2            | 202.8            |
| LNnT  | G1         | PRE-TERM  | 41                        | 12 | 61.39                    | 464.0 | 177.0 | 115.7 | 161.5    | 112.0            | 172.0            |
| LNnT  | G1         | PRE-TERM  | 42                        | 6  | 78.06                    | 279.5 | 153.4 | 73.87 | 136.5    | 103.7            | 181.7            |
| LNnT  | G1         | PRE-TERM  | 43                        | 10 | 51.86                    | 379.4 | 161.5 | 100.2 | 122.1    | 106.0            | 182.9            |

**Table S4 Concentration of Human Milk Oligosaccharides in Term or Preterm Milk At Specified Postmenstrual Age Separated By Milk Group**

\* When there are results below the method limit of quantification (LoQ) the result has been assigned value of  $0.5 \times \text{LoQ}$ , hence the minimum value appears to be the same in many cases. When a large number of datapoints are below LoQ this can also have the effect that the median = minimum.

| HMO  | Milk Group | Study Arm | Postmenstrual Age (weeks) | N  | HMO Concentration (mg/L) |       |       |       |          |                  |                  |
|------|------------|-----------|---------------------------|----|--------------------------|-------|-------|-------|----------|------------------|------------------|
|      |            |           |                           |    | min *                    | max   | mean  | sd    | median * | Quartile 1 (25%) | Quartile 3 (75%) |
| LNnT | G1         | PRE-TERM  | 44                        | 5  | 89.73                    | 229.8 | 149.0 | 52.41 | 131.7    | 129.1            | 165.0            |
| LNnT | G1         | PRE-TERM  | 45                        | 9  | 38.26                    | 444.3 | 160.2 | 133.0 | 119.5    | 68.35            | 246.2            |
| LNnT | G1         | PRE-TERM  | 46                        | 6  | 86.23                    | 180.1 | 123.5 | 40.65 | 119.3    | 87.82            | 148.9            |
| LNnT | G1         | PRE-TERM  | 47                        | 3  | 34.77                    | 437.3 | 184.3 | 220.3 | 80.91    | 57.84            | 259.1            |
| LNnT | G1         | PRE-TERM  | 48                        | 4  | 75.22                    | 208.8 | 129.2 | 63.50 | 116.3    | 79.45            | 166.0            |
| LNnT | G1         | TERM      | 38                        | 2  | 377.9                    | 400.4 | 389.2 | 15.95 | 389.2    | 383.5            | 394.8            |
| LNnT | G1         | TERM      | 39                        | 9  | 162.4                    | 565.3 | 367.7 | 139.5 | 418.4    | 260.1            | 459.2            |
| LNnT | G1         | TERM      | 40                        | 13 | 127.0                    | 452.2 | 294.0 | 88.16 | 287.9    | 235.9            | 343.3            |
| LNnT | G1         | TERM      | 41                        | 21 | 149.5                    | 435.1 | 273.3 | 79.58 | 264.5    | 223.2            | 325.8            |
| LNnT | G1         | TERM      | 42                        | 21 | 108.9                    | 350.3 | 206.1 | 67.67 | 193.4    | 145.2            | 252.6            |
| LNnT | G1         | TERM      | 43                        | 21 | 78.28                    | 369.5 | 185.4 | 77.74 | 182.3    | 116.8            | 243.9            |
| LNnT | G1         | TERM      | 44                        | 20 | 74.62                    | 311.2 | 162.7 | 68.54 | 146.1    | 118.0            | 190.6            |
| LNnT | G1         | TERM      | 45                        | 21 | 79.18                    | 281.9 | 161.6 | 61.88 | 145.0    | 116.5            | 199.9            |
| LNnT | G1         | TERM      | 46                        | 17 | 64.27                    | 284.9 | 150.6 | 65.15 | 140.6    | 113.6            | 177.1            |
| LNnT | G1         | TERM      | 47                        | 12 | 52.58                    | 245.5 | 133.5 | 56.83 | 130.0    | 82.12            | 164.4            |
| LNnT | G1         | TERM      | 48                        | 6  | 64.38                    | 195.3 | 109.2 | 47.22 | 98.38    | 79.07            | 119.0            |
| LNnT | G2         | PRE-TERM  | 29                        | 1  | 165.4                    | 165.4 | 165.4 | NA    | 165.4    | 165.4            | 165.4            |
| LNnT | G2         | PRE-TERM  | 30                        | 2  | 137.3                    | 190.4 | 163.8 | 37.57 | 163.8    | 150.6            | 177.1            |
| LNnT | G2         | PRE-TERM  | 31                        | 2  | 136.5                    | 150.1 | 143.3 | 9.656 | 143.3    | 139.9            | 146.7            |
| LNnT | G2         | PRE-TERM  | 32                        | 3  | 79.69                    | 192.5 | 120.8 | 62.33 | 90.25    | 84.97            | 141.4            |
| LNnT | G2         | PRE-TERM  | 33                        | 5  | 67.88                    | 257.5 | 141.4 | 76.78 | 106.1    | 96.36            | 179.1            |
| LNnT | G2         | PRE-TERM  | 34                        | 5  | 66.51                    | 156.9 | 101.3 | 37.28 | 99.24    | 68.78            | 115.1            |
| LNnT | G2         | PRE-TERM  | 35                        | 5  | 60.11                    | 147.7 | 92.92 | 35.29 | 95.82    | 63.43            | 97.50            |
| LNnT | G2         | PRE-TERM  | 36                        | 5  | 43.09                    | 123.0 | 76.81 | 32.70 | 66.71    | 54.40            | 96.86            |
| LNnT | G2         | PRE-TERM  | 37                        | 4  | 48.51                    | 112.2 | 75.39 | 32.03 | 70.43    | 48.59            | 97.23            |
| LNnT | G2         | PRE-TERM  | 38                        | 4  | 35.89                    | 118.6 | 69.18 | 35.58 | 61.13    | 48.96            | 81.35            |
| LNnT | G2         | PRE-TERM  | 39                        | 3  | 33.45                    | 112.8 | 68.74 | 40.41 | 59.95    | 46.70            | 86.39            |
| LNnT | G2         | PRE-TERM  | 40                        | 3  | 36.42                    | 103.7 | 62.63 | 36.00 | 47.80    | 42.11            | 75.74            |
| LNnT | G2         | PRE-TERM  | 41                        | 2  | 27.39                    | 48.63 | 38.01 | 15.02 | 38.01    | 32.70            | 43.32            |
| LNnT | G2         | PRE-TERM  | 42                        | 3  | 24.44                    | 77.16 | 45.63 | 27.84 | 35.29    | 29.87            | 56.22            |
| LNnT | G2         | PRE-TERM  | 43                        | 2  | 12.00                    | 41.91 | 26.96 | 21.15 | 26.96    | 19.48            | 34.44            |
| LNnT | G2         | PRE-TERM  | 44                        | 3  | 32.38                    | 66.88 | 45.43 | 18.72 | 37.04    | 34.71            | 51.96            |
| LNnT | G2         | PRE-TERM  | 45                        | 2  | 12.00                    | 39.37 | 25.69 | 19.35 | 25.69    | 18.84            | 32.53            |
| LNnT | G2         | PRE-TERM  | 46                        | 2  | 38.00                    | 70.50 | 54.25 | 22.99 | 54.25    | 46.12            | 62.38            |
| LNnT | G2         | PRE-TERM  | 48                        | 1  | 25.55                    | 25.55 | 25.55 | NA    | 25.55    | 25.55            | 25.55            |
| LNnT | G2         | TERM      | 39                        | 1  | 251.3                    | 251.3 | 251.3 | NA    | 251.3    | 251.3            | 251.3            |

**Table S4 Concentration of Human Milk Oligosaccharides in Term or Preterm Milk At Specified Postmenstrual Age Separated By Milk Group**

\* When there are results below the method limit of quantification (LoQ) the result has been assigned value of  $0.5 \times \text{LoQ}$ , hence the minimum value appears to be the same in many cases. When a large number of datapoints are below LoQ this can also have the effect that the median = minimum.

| HMO  | Milk Group | Study Arm | Postmenstrual Age (weeks) | N | HMO Concentration (mg/L) |       |       |       |          |                  |                  |
|------|------------|-----------|---------------------------|---|--------------------------|-------|-------|-------|----------|------------------|------------------|
|      |            |           |                           |   | min *                    | max   | mean  | sd    | median * | Quartile 1 (25%) | Quartile 3 (75%) |
| LNnT | G2         | TERM      | 40                        | 5 | 113.9                    | 338.7 | 216.6 | 81.39 | 214.0    | 187.1            | 229.1            |
| LNnT | G2         | TERM      | 41                        | 4 | 67.58                    | 136.8 | 115.3 | 32.58 | 128.4    | 107.8            | 135.9            |
| LNnT | G2         | TERM      | 42                        | 6 | 52.63                    | 131.0 | 105.0 | 28.92 | 113.8    | 97.70            | 123.3            |
| LNnT | G2         | TERM      | 43                        | 5 | 54.25                    | 129.1 | 90.76 | 31.13 | 82.76    | 71.58            | 116.1            |
| LNnT | G2         | TERM      | 44                        | 5 | 41.39                    | 147.0 | 83.69 | 46.59 | 59.76    | 51.21            | 119.1            |
| LNnT | G2         | TERM      | 45                        | 5 | 12.00                    | 175.5 | 90.14 | 71.43 | 79.17    | 33.31            | 150.6            |
| LNnT | G2         | TERM      | 46                        | 5 | 35.80                    | 141.0 | 85.40 | 51.96 | 76.38    | 36.11            | 137.7            |
| LNnT | G2         | TERM      | 47                        | 4 | 27.23                    | 158.7 | 107.5 | 58.64 | 122.1    | 83.08            | 146.5            |
| LNnT | G3         | PRE-TERM  | 30                        | 1 | 215.7                    | 215.7 | 215.7 | NA    | 215.7    | 215.7            | 215.7            |
| LNnT | G3         | PRE-TERM  | 31                        | 1 | 118.3                    | 118.3 | 118.3 | NA    | 118.3    | 118.3            | 118.3            |
| LNnT | G3         | PRE-TERM  | 32                        | 1 | 92.48                    | 92.48 | 92.48 | NA    | 92.48    | 92.48            | 92.48            |
| LNnT | G3         | PRE-TERM  | 33                        | 1 | 108.9                    | 108.9 | 108.9 | NA    | 108.9    | 108.9            | 108.9            |
| LNnT | G3         | PRE-TERM  | 34                        | 1 | 88.14                    | 88.14 | 88.14 | NA    | 88.14    | 88.14            | 88.14            |
| LNnT | G3         | PRE-TERM  | 35                        | 1 | 118.9                    | 118.9 | 118.9 | NA    | 118.9    | 118.9            | 118.9            |
| LNnT | G3         | PRE-TERM  | 36                        | 1 | 71.24                    | 71.24 | 71.24 | NA    | 71.24    | 71.24            | 71.24            |
| LNnT | G3         | PRE-TERM  | 37                        | 1 | 93.06                    | 93.06 | 93.06 | NA    | 93.06    | 93.06            | 93.06            |
| LNnT | G3         | PRE-TERM  | 39                        | 1 | 73.63                    | 73.63 | 73.63 | NA    | 73.63    | 73.63            | 73.63            |
| LNnT | G3         | PRE-TERM  | 41                        | 1 | 74.39                    | 74.39 | 74.39 | NA    | 74.39    | 74.39            | 74.39            |
| LNnT | G3         | PRE-TERM  | 43                        | 1 | 85.57                    | 85.57 | 85.57 | NA    | 85.57    | 85.57            | 85.57            |
| LNnT | G3         | PRE-TERM  | 45                        | 1 | 67.99                    | 67.99 | 67.99 | NA    | 67.99    | 67.99            | 67.99            |
| LNnT | G3         | TERM      | 41                        | 1 | 394.6                    | 394.6 | 394.6 | NA    | 394.6    | 394.6            | 394.6            |
| LNnT | G3         | TERM      | 42                        | 1 | 162.7                    | 162.7 | 162.7 | NA    | 162.7    | 162.7            | 162.7            |
| LNnT | G3         | TERM      | 43                        | 1 | 159.5                    | 159.5 | 159.5 | NA    | 159.5    | 159.5            | 159.5            |
| LNnT | G3         | TERM      | 44                        | 1 | 135.3                    | 135.3 | 135.3 | NA    | 135.3    | 135.3            | 135.3            |
| LNnT | G3         | TERM      | 45                        | 1 | 129.1                    | 129.1 | 129.1 | NA    | 129.1    | 129.1            | 129.1            |
| LNnT | G3         | TERM      | 46                        | 1 | 77.12                    | 77.12 | 77.12 | NA    | 77.12    | 77.12            | 77.12            |
| LNnT | G3         | TERM      | 47                        | 1 | 77.74                    | 77.74 | 77.74 | NA    | 77.74    | 77.74            | 77.74            |
| LNnT | G3         | TERM      | 48                        | 1 | 101.1                    | 101.1 | 101.1 | NA    | 101.1    | 101.1            | 101.1            |
| LNnT | G4         | TERM      | 40                        | 1 | 399.6                    | 399.6 | 399.6 | NA    | 399.6    | 399.6            | 399.6            |
| LNnT | G4         | TERM      | 41                        | 1 | 247.5                    | 247.5 | 247.5 | NA    | 247.5    | 247.5            | 247.5            |
| LNnT | G4         | TERM      | 42                        | 1 | 183.6                    | 183.6 | 183.6 | NA    | 183.6    | 183.6            | 183.6            |
| LNnT | G4         | TERM      | 43                        | 1 | 118.1                    | 118.1 | 118.1 | NA    | 118.1    | 118.1            | 118.1            |
| LNnT | G4         | TERM      | 44                        | 1 | 12.00                    | 12.00 | 12.00 | NA    | 12.00    | 12.00            | 12.00            |
| LNnT | G4         | TERM      | 45                        | 1 | 76.25                    | 76.25 | 76.25 | NA    | 76.25    | 76.25            | 76.25            |
| LNnT | G4         | TERM      | 46                        | 1 | 84.14                    | 84.14 | 84.14 | NA    | 84.14    | 84.14            | 84.14            |
| LNnT | G4         | TERM      | 47                        | 1 | 104.1                    | 104.1 | 104.1 | NA    | 104.1    | 104.1            | 104.1            |

**Table S4 Concentration of Human Milk Oligosaccharides in Term or Preterm Milk At Specified Postmenstrual Age Separated By Milk Group**

\* When there are results below the method limit of quantification (LoQ) the result has been assigned value of  $0.5 \times \text{LoQ}$ , hence the minimum value appears to be the same in many cases. When a large number of datapoints are below LoQ this can also have the effect that the median = minimum.

| HMO | Milk Group | Study Arm | Postmenstrual Age (weeks) | N  | HMO Concentration (mg/L) |       |       |       |          |                  |                  |
|-----|------------|-----------|---------------------------|----|--------------------------|-------|-------|-------|----------|------------------|------------------|
|     |            |           |                           |    | min *                    | max   | mean  | sd    | median * | Quartile 1 (25%) | Quartile 3 (75%) |
| LNT | G1         | PRE-TERM  | 30                        | 7  | 630.4                    | 2002  | 934.4 | 481.8 | 819.4    | 675.1            | 869.2            |
| LNT | G1         | PRE-TERM  | 31                        | 9  | 1040                     | 1821  | 1330  | 305.4 | 1186     | 1105             | 1677             |
| LNT | G1         | PRE-TERM  | 32                        | 13 | 298.8                    | 2157  | 1158  | 509.4 | 997.4    | 806.7            | 1475             |
| LNT | G1         | PRE-TERM  | 33                        | 18 | 341.5                    | 1937  | 1048  | 405.3 | 1033     | 829.0            | 1212             |
| LNT | G1         | PRE-TERM  | 34                        | 19 | 653.0                    | 2851  | 1180  | 580.3 | 1000     | 831.1            | 1263             |
| LNT | G1         | PRE-TERM  | 35                        | 18 | 479.3                    | 2428  | 1198  | 573.8 | 1039     | 835.5            | 1573             |
| LNT | G1         | PRE-TERM  | 36                        | 19 | 469.1                    | 2737  | 1116  | 622.3 | 1030     | 600.5            | 1486             |
| LNT | G1         | PRE-TERM  | 37                        | 18 | 356.6                    | 2468  | 992.3 | 532.9 | 993.0    | 553.7            | 1231             |
| LNT | G1         | PRE-TERM  | 38                        | 11 | 144.1                    | 1498  | 692.3 | 469.2 | 635.4    | 303.8            | 896.7            |
| LNT | G1         | PRE-TERM  | 39                        | 16 | 332.2                    | 1829  | 871.5 | 490.6 | 658.0    | 537.0            | 1228             |
| LNT | G1         | PRE-TERM  | 40                        | 7  | 317.3                    | 1960  | 901.1 | 635.6 | 578.3    | 410.1            | 1316             |
| LNT | G1         | PRE-TERM  | 41                        | 12 | 175.3                    | 1283  | 634.6 | 348.2 | 632.0    | 332.4            | 895.0            |
| LNT | G1         | PRE-TERM  | 42                        | 6  | 287.6                    | 1271  | 759.4 | 400.8 | 800.8    | 418.2            | 1029             |
| LNT | G1         | PRE-TERM  | 43                        | 10 | 304.6                    | 1191  | 758.4 | 332.7 | 687.4    | 515.5            | 1092             |
| LNT | G1         | PRE-TERM  | 44                        | 5  | 301.3                    | 879.3 | 665.0 | 250.0 | 763.9    | 516.0            | 864.4            |
| LNT | G1         | PRE-TERM  | 45                        | 9  | 145.2                    | 1057  | 624.3 | 310.2 | 769.3    | 422.8            | 827.3            |
| LNT | G1         | PRE-TERM  | 46                        | 6  | 232.8                    | 1011  | 563.1 | 278.3 | 541.5    | 381.3            | 678.4            |
| LNT | G1         | PRE-TERM  | 47                        | 3  | 248.2                    | 773.5 | 569.6 | 281.7 | 687.1    | 467.6            | 730.3            |
| LNT | G1         | PRE-TERM  | 48                        | 4  | 205.0                    | 879.6 | 481.3 | 319.2 | 420.2    | 233.1            | 668.4            |
| LNT | G1         | TERM      | 38                        | 2  | 598.9                    | 923.2 | 761.1 | 229.3 | 761.1    | 680.0            | 842.1            |
| LNT | G1         | TERM      | 39                        | 9  | 199.8                    | 1223  | 631.9 | 382.6 | 549.4    | 356.9            | 964.5            |
| LNT | G1         | TERM      | 40                        | 13 | 214.3                    | 1580  | 1035  | 375.4 | 1178     | 809.8            | 1282             |
| LNT | G1         | TERM      | 41                        | 21 | 515.1                    | 1924  | 1113  | 405.1 | 1154     | 683.8            | 1399             |
| LNT | G1         | TERM      | 42                        | 21 | 590.5                    | 1862  | 1142  | 345.8 | 1165     | 919.7            | 1305             |
| LNT | G1         | TERM      | 43                        | 21 | 359.8                    | 1894  | 1021  | 413.2 | 1074     | 664.9            | 1272             |
| LNT | G1         | TERM      | 44                        | 20 | 313.1                    | 1536  | 884.8 | 396.5 | 797.3    | 586.6            | 1271             |
| LNT | G1         | TERM      | 45                        | 21 | 307.2                    | 1392  | 806.8 | 344.8 | 758.9    | 568.3            | 1002             |
| LNT | G1         | TERM      | 46                        | 17 | 213.7                    | 1567  | 802.3 | 433.0 | 749.2    | 362.2            | 1110             |
| LNT | G1         | TERM      | 47                        | 12 | 217.7                    | 1498  | 786.9 | 413.3 | 740.0    | 482.2            | 1084             |
| LNT | G1         | TERM      | 48                        | 6  | 269.1                    | 856.9 | 562.8 | 245.2 | 582.5    | 357.2            | 748.5            |
| LNT | G2         | PRE-TERM  | 29                        | 1  | 3029                     | 3029  | 3029  | NA    | 3029     | 3029             | 3029             |
| LNT | G2         | PRE-TERM  | 30                        | 2  | 1428                     | 3296  | 2362  | 1321  | 2362     | 1895             | 2829             |
| LNT | G2         | PRE-TERM  | 31                        | 2  | 2029                     | 2903  | 2466  | 617.9 | 2466     | 2247             | 2684             |
| LNT | G2         | PRE-TERM  | 32                        | 3  | 1901                     | 2283  | 2029  | 220.2 | 1902     | 1901             | 2092             |
| LNT | G2         | PRE-TERM  | 33                        | 5  | 1825                     | 2537  | 2120  | 295.0 | 2061     | 1887             | 2290             |
| LNT | G2         | PRE-TERM  | 34                        | 5  | 1613                     | 2810  | 2002  | 492.3 | 1867     | 1628             | 2091             |

**Table S4 Concentration of Human Milk Oligosaccharides in Term or Preterm Milk At Specified Postmenstrual Age Separated By Milk Group**

\* When there are results below the method limit of quantification (LoQ) the result has been assigned value of  $0.5 \times \text{LoQ}$ , hence the minimum value appears to be the same in many cases. When a large number of datapoints are below LoQ this can also have the effect that the median = minimum.

| HMO | Milk Group | Study Arm | Postmenstrual Age (weeks) | N | HMO Concentration (mg/L) |       |       |       |          |                  |                  |
|-----|------------|-----------|---------------------------|---|--------------------------|-------|-------|-------|----------|------------------|------------------|
|     |            |           |                           |   | min *                    | max   | mean  | sd    | median * | Quartile 1 (25%) | Quartile 3 (75%) |
| LNT | G2         | PRE-TERM  | 35                        | 5 | 1428                     | 2498  | 1932  | 483.4 | 1854     | 1519             | 2361             |
| LNT | G2         | PRE-TERM  | 36                        | 5 | 1389                     | 2397  | 1901  | 465.9 | 1775     | 1563             | 2381             |
| LNT | G2         | PRE-TERM  | 37                        | 4 | 1119                     | 1831  | 1499  | 330.6 | 1523     | 1279             | 1742             |
| LNT | G2         | PRE-TERM  | 38                        | 4 | 1110                     | 1942  | 1552  | 434.1 | 1579     | 1215             | 1916             |
| LNT | G2         | PRE-TERM  | 39                        | 3 | 918.0                    | 2376  | 1685  | 732.0 | 1762     | 1340             | 2069             |
| LNT | G2         | PRE-TERM  | 40                        | 3 | 992.2                    | 2184  | 1429  | 657.0 | 1109     | 1051             | 1647             |
| LNT | G2         | PRE-TERM  | 41                        | 2 | 898.7                    | 1554  | 1226  | 463.4 | 1226     | 1063             | 1390             |
| LNT | G2         | PRE-TERM  | 42                        | 3 | 704.7                    | 1221  | 945.1 | 260.1 | 909.4    | 807.0            | 1065             |
| LNT | G2         | PRE-TERM  | 43                        | 2 | 312.5                    | 775.7 | 544.1 | 327.6 | 544.1    | 428.3            | 659.9            |
| LNT | G2         | PRE-TERM  | 44                        | 3 | 831.5                    | 1051  | 965.3 | 117.4 | 1013     | 922.4            | 1032             |
| LNT | G2         | PRE-TERM  | 45                        | 2 | 401.3                    | 2113  | 1257  | 1210  | 1257     | 829.2            | 1685             |
| LNT | G2         | PRE-TERM  | 46                        | 2 | 447.8                    | 1162  | 805.0 | 505.1 | 805.0    | 626.4            | 983.6            |
| LNT | G2         | PRE-TERM  | 48                        | 1 | 816.9                    | 816.9 | 816.9 | NA    | 816.9    | 816.9            | 816.9            |
| LNT | G2         | TERM      | 39                        | 1 | 1253                     | 1253  | 1253  | NA    | 1253     | 1253             | 1253             |
| LNT | G2         | TERM      | 40                        | 5 | 1074                     | 2478  | 1765  | 630.2 | 1994     | 1130             | 2148             |
| LNT | G2         | TERM      | 41                        | 4 | 904.3                    | 2056  | 1714  | 548.4 | 1947     | 1609             | 2051             |
| LNT | G2         | TERM      | 42                        | 6 | 985.8                    | 2236  | 1656  | 413.2 | 1702     | 1526             | 1806             |
| LNT | G2         | TERM      | 43                        | 5 | 905.7                    | 2354  | 1562  | 569.5 | 1346     | 1294             | 1909             |
| LNT | G2         | TERM      | 44                        | 5 | 726.0                    | 2342  | 1411  | 751.4 | 942.4    | 939.1            | 2104             |
| LNT | G2         | TERM      | 45                        | 5 | 342.4                    | 1986  | 1130  | 747.3 | 792.0    | 659.9            | 1869             |
| LNT | G2         | TERM      | 46                        | 5 | 576.2                    | 1405  | 952.7 | 340.8 | 813.3    | 764.7            | 1204             |
| LNT | G2         | TERM      | 47                        | 4 | 454.4                    | 1637  | 1089  | 574.3 | 1133     | 681.2            | 1541             |
| LNT | G3         | PRE-TERM  | 30                        | 1 | 975.2                    | 975.2 | 975.2 | NA    | 975.2    | 975.2            | 975.2            |
| LNT | G3         | PRE-TERM  | 31                        | 1 | 965.1                    | 965.1 | 965.1 | NA    | 965.1    | 965.1            | 965.1            |
| LNT | G3         | PRE-TERM  | 32                        | 1 | 1112                     | 1112  | 1112  | NA    | 1112     | 1112             | 1112             |
| LNT | G3         | PRE-TERM  | 33                        | 1 | 1195                     | 1195  | 1195  | NA    | 1195     | 1195             | 1195             |
| LNT | G3         | PRE-TERM  | 34                        | 1 | 880.4                    | 880.4 | 880.4 | NA    | 880.4    | 880.4            | 880.4            |
| LNT | G3         | PRE-TERM  | 35                        | 1 | 760.5                    | 760.5 | 760.5 | NA    | 760.5    | 760.5            | 760.5            |
| LNT | G3         | PRE-TERM  | 36                        | 1 | 592.7                    | 592.7 | 592.7 | NA    | 592.7    | 592.7            | 592.7            |
| LNT | G3         | PRE-TERM  | 37                        | 1 | 659.1                    | 659.1 | 659.1 | NA    | 659.1    | 659.1            | 659.1            |
| LNT | G3         | PRE-TERM  | 39                        | 1 | 561.7                    | 561.7 | 561.7 | NA    | 561.7    | 561.7            | 561.7            |
| LNT | G3         | PRE-TERM  | 41                        | 1 | 660.0                    | 660.0 | 660.0 | NA    | 660.0    | 660.0            | 660.0            |
| LNT | G3         | PRE-TERM  | 43                        | 1 | 586.0                    | 586.0 | 586.0 | NA    | 586.0    | 586.0            | 586.0            |
| LNT | G3         | PRE-TERM  | 45                        | 1 | 604.4                    | 604.4 | 604.4 | NA    | 604.4    | 604.4            | 604.4            |
| LNT | G3         | TERM      | 41                        | 1 | 359.0                    | 359.0 | 359.0 | NA    | 359.0    | 359.0            | 359.0            |
| LNT | G3         | TERM      | 42                        | 1 | 358.7                    | 358.7 | 358.7 | NA    | 358.7    | 358.7            | 358.7            |

**Table S4 Concentration of Human Milk Oligosaccharides in Term or Preterm Milk At Specified Postmenstrual Age Separated By Milk Group**

\* When there are results below the method limit of quantification (LoQ) the result has been assigned value of  $0.5 \times \text{LoQ}$ , hence the minimum value appears to be the same in many cases. When a large number of datapoints are below LoQ this can also have the effect that the median = minimum.

| HMO  | Milk Group | Study Arm | Postmenstrual Age (weeks) | N  | HMO Concentration (mg/L) |       |       |       |          |                  |                  |
|------|------------|-----------|---------------------------|----|--------------------------|-------|-------|-------|----------|------------------|------------------|
|      |            |           |                           |    | min *                    | max   | mean  | sd    | median * | Quartile 1 (25%) | Quartile 3 (75%) |
| LNT  | G3         | TERM      | 43                        | 1  | 588.9                    | 588.9 | 588.9 | NA    | 588.9    | 588.9            | 588.9            |
| LNT  | G3         | TERM      | 44                        | 1  | 484.2                    | 484.2 | 484.2 | NA    | 484.2    | 484.2            | 484.2            |
| LNT  | G3         | TERM      | 45                        | 1  | 572.1                    | 572.1 | 572.1 | NA    | 572.1    | 572.1            | 572.1            |
| LNT  | G3         | TERM      | 46                        | 1  | 394.1                    | 394.1 | 394.1 | NA    | 394.1    | 394.1            | 394.1            |
| LNT  | G3         | TERM      | 47                        | 1  | 417.8                    | 417.8 | 417.8 | NA    | 417.8    | 417.8            | 417.8            |
| LNT  | G3         | TERM      | 48                        | 1  | 307.1                    | 307.1 | 307.1 | NA    | 307.1    | 307.1            | 307.1            |
| LNT  | G4         | TERM      | 40                        | 1  | 3400                     | 3400  | 3400  | NA    | 3400     | 3400             | 3400             |
| LNT  | G4         | TERM      | 41                        | 1  | 3848                     | 3848  | 3848  | NA    | 3848     | 3848             | 3848             |
| LNT  | G4         | TERM      | 42                        | 1  | 3092                     | 3092  | 3092  | NA    | 3092     | 3092             | 3092             |
| LNT  | G4         | TERM      | 43                        | 1  | 3087                     | 3087  | 3087  | NA    | 3087     | 3087             | 3087             |
| LNT  | G4         | TERM      | 44                        | 1  | 2480                     | 2480  | 2480  | NA    | 2480     | 2480             | 2480             |
| LNT  | G4         | TERM      | 45                        | 1  | 2109                     | 2109  | 2109  | NA    | 2109     | 2109             | 2109             |
| LNT  | G4         | TERM      | 46                        | 1  | 2251                     | 2251  | 2251  | NA    | 2251     | 2251             | 2251             |
| LNT  | G4         | TERM      | 47                        | 1  | 1852                     | 1852  | 1852  | NA    | 1852     | 1852             | 1852             |
| LSTb | G1         | PRE-TERM  | 30                        | 7  | 54.76                    | 91.46 | 71.90 | 13.94 | 71.49    | 61.56            | 81.22            |
| LSTb | G1         | PRE-TERM  | 31                        | 9  | 71.27                    | 147.8 | 98.24 | 24.79 | 93.18    | 79.15            | 114.1            |
| LSTb | G1         | PRE-TERM  | 32                        | 13 | 44.25                    | 211.3 | 94.32 | 49.35 | 79.65    | 57.51            | 114.2            |
| LSTb | G1         | PRE-TERM  | 33                        | 18 | 41.49                    | 178.8 | 91.87 | 42.73 | 82.78    | 61.44            | 123.2            |
| LSTb | G1         | PRE-TERM  | 34                        | 19 | 49.85                    | 168.4 | 99.77 | 38.51 | 100.1    | 59.73            | 125.3            |
| LSTb | G1         | PRE-TERM  | 35                        | 18 | 47.34                    | 205.4 | 108.8 | 44.65 | 113.6    | 72.07            | 136.9            |
| LSTb | G1         | PRE-TERM  | 36                        | 19 | 42.09                    | 134.2 | 91.19 | 35.65 | 99.07    | 54.51            | 128.0            |
| LSTb | G1         | PRE-TERM  | 37                        | 18 | 37.86                    | 137.9 | 90.51 | 35.85 | 92.42    | 55.45            | 124.2            |
| LSTb | G1         | PRE-TERM  | 38                        | 11 | 7.000                    | 144.9 | 80.06 | 46.26 | 63.09    | 48.34            | 121.1            |
| LSTb | G1         | PRE-TERM  | 39                        | 16 | 38.99                    | 146.6 | 88.35 | 38.48 | 87.17    | 50.34            | 122.2            |
| LSTb | G1         | PRE-TERM  | 40                        | 7  | 48.94                    | 146.3 | 98.61 | 36.56 | 100.2    | 71.88            | 125.6            |
| LSTb | G1         | PRE-TERM  | 41                        | 12 | 34.87                    | 191.9 | 88.56 | 51.25 | 81.73    | 46.83            | 112.6            |
| LSTb | G1         | PRE-TERM  | 42                        | 6  | 39.45                    | 142.5 | 82.85 | 41.21 | 83.55    | 47.49            | 105.3            |
| LSTb | G1         | PRE-TERM  | 43                        | 10 | 31.54                    | 195.0 | 96.71 | 45.20 | 97.42    | 72.36            | 112.2            |
| LSTb | G1         | PRE-TERM  | 44                        | 5  | 44.11                    | 92.55 | 73.07 | 18.91 | 75.91    | 66.87            | 85.94            |
| LSTb | G1         | PRE-TERM  | 45                        | 9  | 33.70                    | 102.6 | 77.22 | 21.16 | 81.03    | 75.40            | 91.53            |
| LSTb | G1         | PRE-TERM  | 46                        | 6  | 25.18                    | 94.78 | 71.06 | 26.49 | 75.91    | 62.73            | 91.16            |
| LSTb | G1         | PRE-TERM  | 47                        | 3  | 36.39                    | 84.41 | 61.71 | 24.12 | 64.34    | 50.36            | 74.38            |
| LSTb | G1         | PRE-TERM  | 48                        | 4  | 23.33                    | 75.54 | 49.91 | 21.35 | 50.39    | 42.67            | 57.64            |
| LSTb | G1         | TERM      | 38                        | 2  | 56.67                    | 94.71 | 75.69 | 26.90 | 75.69    | 66.18            | 85.20            |
| LSTb | G1         | TERM      | 39                        | 9  | 33.70                    | 89.73 | 65.07 | 18.20 | 68.78    | 50.04            | 72.96            |
| LSTb | G1         | TERM      | 40                        | 13 | 28.89                    | 141.7 | 74.31 | 30.16 | 64.19    | 51.10            | 94.91            |

**Table S4 Concentration of Human Milk Oligosaccharides in Term or Preterm Milk At Specified Postmenstrual Age Separated By Milk Group**

\* When there are results below the method limit of quantification (LoQ) the result has been assigned value of  $0.5 \times \text{LoQ}$ , hence the minimum value appears to be the same in many cases. When a large number of datapoints are below LoQ this can also have the effect that the median = minimum.

| HMO  | Milk Group | Study Arm | Postmenstrual Age (weeks) | N  | HMO Concentration (mg/L) |       |       |       |          |                  |                  |
|------|------------|-----------|---------------------------|----|--------------------------|-------|-------|-------|----------|------------------|------------------|
|      |            |           |                           |    | min *                    | max   | mean  | sd    | median * | Quartile 1 (25%) | Quartile 3 (75%) |
| LSTb | G1         | TERM      | 41                        | 21 | 36.75                    | 149.1 | 78.11 | 30.45 | 70.83    | 54.29            | 98.29            |
| LSTb | G1         | TERM      | 42                        | 21 | 32.58                    | 163.7 | 80.98 | 31.85 | 77.06    | 55.35            | 98.91            |
| LSTb | G1         | TERM      | 43                        | 21 | 36.28                    | 127.3 | 78.62 | 27.72 | 77.58    | 56.56            | 95.80            |
| LSTb | G1         | TERM      | 44                        | 20 | 20.15                    | 166.6 | 76.40 | 36.46 | 71.56    | 55.13            | 98.66            |
| LSTb | G1         | TERM      | 45                        | 21 | 7.000                    | 147.4 | 67.05 | 32.09 | 62.38    | 43.69            | 89.22            |
| LSTb | G1         | TERM      | 46                        | 17 | 18.33                    | 177.0 | 76.75 | 45.11 | 68.29    | 43.19            | 100.6            |
| LSTb | G1         | TERM      | 47                        | 12 | 7.000                    | 152.6 | 70.54 | 49.21 | 61.18    | 27.55            | 115.5            |
| LSTb | G1         | TERM      | 48                        | 6  | 22.20                    | 119.2 | 67.21 | 37.68 | 69.22    | 36.92            | 90.22            |
| LSTb | G2         | PRE-TERM  | 29                        | 1  | 183.1                    | 183.1 | 183.1 | NA    | 183.1    | 183.1            | 183.1            |
| LSTb | G2         | PRE-TERM  | 30                        | 2  | 125.0                    | 159.2 | 142.1 | 24.15 | 142.1    | 133.6            | 150.7            |
| LSTb | G2         | PRE-TERM  | 31                        | 2  | 148.0                    | 182.1 | 165.0 | 24.06 | 165.0    | 156.5            | 173.6            |
| LSTb | G2         | PRE-TERM  | 32                        | 3  | 100.9                    | 217.4 | 157.2 | 58.37 | 153.2    | 127.1            | 185.3            |
| LSTb | G2         | PRE-TERM  | 33                        | 5  | 106.0                    | 256.1 | 184.3 | 58.35 | 188.4    | 151.4            | 219.5            |
| LSTb | G2         | PRE-TERM  | 34                        | 5  | 96.85                    | 334.7 | 171.6 | 94.74 | 145.4    | 117.2            | 163.7            |
| LSTb | G2         | PRE-TERM  | 35                        | 5  | 91.92                    | 314.7 | 164.9 | 88.05 | 151.3    | 110.3            | 156.2            |
| LSTb | G2         | PRE-TERM  | 36                        | 5  | 78.90                    | 423.9 | 184.9 | 141.1 | 133.0    | 92.87            | 195.8            |
| LSTb | G2         | PRE-TERM  | 37                        | 4  | 110.4                    | 400.7 | 198.3 | 135.8 | 141.0    | 131.9            | 207.3            |
| LSTb | G2         | PRE-TERM  | 38                        | 4  | 66.06                    | 161.7 | 112.0 | 41.60 | 110.2    | 86.11            | 136.1            |
| LSTb | G2         | PRE-TERM  | 39                        | 3  | 74.62                    | 156.5 | 110.4 | 41.90 | 100.0    | 87.33            | 128.3            |
| LSTb | G2         | PRE-TERM  | 40                        | 3  | 55.66                    | 135.2 | 100.2 | 40.63 | 109.8    | 82.73            | 122.5            |
| LSTb | G2         | PRE-TERM  | 41                        | 2  | 77.14                    | 405.6 | 241.3 | 232.2 | 241.3    | 159.2            | 323.4            |
| LSTb | G2         | PRE-TERM  | 42                        | 3  | 51.40                    | 143.0 | 93.36 | 46.26 | 85.72    | 68.56            | 114.3            |
| LSTb | G2         | PRE-TERM  | 43                        | 2  | 54.05                    | 243.3 | 148.7 | 133.8 | 148.7    | 101.4            | 196.0            |
| LSTb | G2         | PRE-TERM  | 44                        | 3  | 43.51                    | 140.5 | 88.03 | 49.01 | 80.04    | 61.78            | 110.3            |
| LSTb | G2         | PRE-TERM  | 45                        | 2  | 85.64                    | 247.3 | 166.5 | 114.3 | 166.5    | 126.1            | 206.9            |
| LSTb | G2         | PRE-TERM  | 46                        | 2  | 77.72                    | 114.5 | 96.10 | 26.00 | 96.10    | 86.91            | 105.3            |
| LSTb | G2         | PRE-TERM  | 48                        | 1  | 106.9                    | 106.9 | 106.9 | NA    | 106.9    | 106.9            | 106.9            |
| LSTb | G2         | TERM      | 39                        | 1  | 102.3                    | 102.3 | 102.3 | NA    | 102.3    | 102.3            | 102.3            |
| LSTb | G2         | TERM      | 40                        | 5  | 51.20                    | 196.6 | 107.1 | 57.30 | 99.12    | 65.94            | 122.7            |
| LSTb | G2         | TERM      | 41                        | 4  | 52.81                    | 108.2 | 84.50 | 26.65 | 88.51    | 67.32            | 105.7            |
| LSTb | G2         | TERM      | 42                        | 6  | 57.67                    | 124.3 | 85.01 | 26.67 | 78.53    | 64.71            | 102.8            |
| LSTb | G2         | TERM      | 43                        | 5  | 42.44                    | 106.8 | 77.62 | 26.02 | 85.80    | 59.96            | 93.06            |
| LSTb | G2         | TERM      | 44                        | 5  | 46.78                    | 120.7 | 81.75 | 32.80 | 70.91    | 58.51            | 111.8            |
| LSTb | G2         | TERM      | 45                        | 5  | 15.28                    | 141.7 | 78.97 | 49.51 | 83.89    | 47.10            | 106.9            |
| LSTb | G2         | TERM      | 46                        | 5  | 27.92                    | 104.2 | 63.54 | 28.36 | 65.64    | 48.44            | 71.49            |
| LSTb | G2         | TERM      | 47                        | 4  | 20.65                    | 119.5 | 68.36 | 40.46 | 66.65    | 53.29            | 81.73            |

**Table S4 Concentration of Human Milk Oligosaccharides in Term or Preterm Milk At Specified Postmenstrual Age Separated By Milk Group**

\* When there are results below the method limit of quantification (LoQ) the result has been assigned value of  $0.5 \times \text{LoQ}$ , hence the minimum value appears to be the same in many cases. When a large number of datapoints are below LoQ this can also have the effect that the median = minimum.

| HMO  | Milk Group | Study Arm | Postmenstrual Age (weeks) | N  | HMO Concentration (mg/L) |       |       |       |          |                  |                  |
|------|------------|-----------|---------------------------|----|--------------------------|-------|-------|-------|----------|------------------|------------------|
|      |            |           |                           |    | min *                    | max   | mean  | sd    | median * | Quartile 1 (25%) | Quartile 3 (75%) |
| LSTb | G3         | PRE-TERM  | 30                        | 1  | 97.28                    | 97.28 | 97.28 | NA    | 97.28    | 97.28            | 97.28            |
| LSTb | G3         | PRE-TERM  | 31                        | 1  | 161.6                    | 161.6 | 161.6 | NA    | 161.6    | 161.6            | 161.6            |
| LSTb | G3         | PRE-TERM  | 32                        | 1  | 151.5                    | 151.5 | 151.5 | NA    | 151.5    | 151.5            | 151.5            |
| LSTb | G3         | PRE-TERM  | 33                        | 1  | 107.7                    | 107.7 | 107.7 | NA    | 107.7    | 107.7            | 107.7            |
| LSTb | G3         | PRE-TERM  | 34                        | 1  | 86.22                    | 86.22 | 86.22 | NA    | 86.22    | 86.22            | 86.22            |
| LSTb | G3         | PRE-TERM  | 35                        | 1  | 67.69                    | 67.69 | 67.69 | NA    | 67.69    | 67.69            | 67.69            |
| LSTb | G3         | PRE-TERM  | 36                        | 1  | 59.00                    | 59.00 | 59.00 | NA    | 59.00    | 59.00            | 59.00            |
| LSTb | G3         | PRE-TERM  | 37                        | 1  | 54.27                    | 54.27 | 54.27 | NA    | 54.27    | 54.27            | 54.27            |
| LSTb | G3         | PRE-TERM  | 39                        | 1  | 42.77                    | 42.77 | 42.77 | NA    | 42.77    | 42.77            | 42.77            |
| LSTb | G3         | PRE-TERM  | 41                        | 1  | 52.23                    | 52.23 | 52.23 | NA    | 52.23    | 52.23            | 52.23            |
| LSTb | G3         | PRE-TERM  | 43                        | 1  | 53.04                    | 53.04 | 53.04 | NA    | 53.04    | 53.04            | 53.04            |
| LSTb | G3         | PRE-TERM  | 45                        | 1  | 53.45                    | 53.45 | 53.45 | NA    | 53.45    | 53.45            | 53.45            |
| LSTb | G3         | TERM      | 41                        | 1  | 15.52                    | 15.52 | 15.52 | NA    | 15.52    | 15.52            | 15.52            |
| LSTb | G3         | TERM      | 42                        | 1  | 40.88                    | 40.88 | 40.88 | NA    | 40.88    | 40.88            | 40.88            |
| LSTb | G3         | TERM      | 43                        | 1  | 46.68                    | 46.68 | 46.68 | NA    | 46.68    | 46.68            | 46.68            |
| LSTb | G3         | TERM      | 44                        | 1  | 54.30                    | 54.30 | 54.30 | NA    | 54.30    | 54.30            | 54.30            |
| LSTb | G3         | TERM      | 45                        | 1  | 50.89                    | 50.89 | 50.89 | NA    | 50.89    | 50.89            | 50.89            |
| LSTb | G3         | TERM      | 46                        | 1  | 46.48                    | 46.48 | 46.48 | NA    | 46.48    | 46.48            | 46.48            |
| LSTb | G3         | TERM      | 47                        | 1  | 40.09                    | 40.09 | 40.09 | NA    | 40.09    | 40.09            | 40.09            |
| LSTb | G3         | TERM      | 48                        | 1  | 45.28                    | 45.28 | 45.28 | NA    | 45.28    | 45.28            | 45.28            |
| LSTb | G4         | TERM      | 40                        | 1  | 168.8                    | 168.8 | 168.8 | NA    | 168.8    | 168.8            | 168.8            |
| LSTb | G4         | TERM      | 41                        | 1  | 160.5                    | 160.5 | 160.5 | NA    | 160.5    | 160.5            | 160.5            |
| LSTb | G4         | TERM      | 42                        | 1  | 115.0                    | 115.0 | 115.0 | NA    | 115.0    | 115.0            | 115.0            |
| LSTb | G4         | TERM      | 43                        | 1  | 124.3                    | 124.3 | 124.3 | NA    | 124.3    | 124.3            | 124.3            |
| LSTb | G4         | TERM      | 44                        | 1  | 107.1                    | 107.1 | 107.1 | NA    | 107.1    | 107.1            | 107.1            |
| LSTb | G4         | TERM      | 45                        | 1  | 136.3                    | 136.3 | 136.3 | NA    | 136.3    | 136.3            | 136.3            |
| LSTb | G4         | TERM      | 46                        | 1  | 100.9                    | 100.9 | 100.9 | NA    | 100.9    | 100.9            | 100.9            |
| LSTb | G4         | TERM      | 47                        | 1  | 97.38                    | 97.38 | 97.38 | NA    | 97.38    | 97.38            | 97.38            |
| LSTc | G1         | PRE-TERM  | 30                        | 7  | 139.5                    | 747.9 | 466.9 | 234.6 | 568.2    | 290.1            | 616.5            |
| LSTc | G1         | PRE-TERM  | 31                        | 9  | 37.98                    | 629.5 | 372.9 | 210.7 | 415.5    | 197.0            | 536.2            |
| LSTc | G1         | PRE-TERM  | 32                        | 13 | 31.79                    | 1019  | 373.4 | 249.6 | 325.3    | 266.4            | 505.4            |
| LSTc | G1         | PRE-TERM  | 33                        | 18 | 28.75                    | 767.6 | 278.2 | 202.6 | 229.6    | 172.6            | 299.1            |
| LSTc | G1         | PRE-TERM  | 34                        | 19 | 52.17                    | 622.9 | 228.8 | 145.4 | 202.1    | 133.0            | 263.2            |
| LSTc | G1         | PRE-TERM  | 35                        | 18 | 71.06                    | 402.8 | 184.3 | 94.67 | 170.2    | 114.1            | 230.0            |
| LSTc | G1         | PRE-TERM  | 36                        | 19 | 45.27                    | 371.1 | 153.9 | 90.37 | 153.8    | 90.20            | 182.8            |
| LSTc | G1         | PRE-TERM  | 37                        | 18 | 49.15                    | 355.6 | 137.5 | 79.52 | 123.4    | 93.96            | 151.7            |



**Table S4 Concentration of Human Milk Oligosaccharides in Term or Preterm Milk At Specified Postmenstrual Age Separated By Milk Group**

\* When there are results below the method limit of quantification (LoQ) the result has been assigned value of  $0.5 \times \text{LoQ}$ , hence the minimum value appears to be the same in many cases. When a large number of datapoints are below LoQ this can also have the effect that the median = minimum.

| HMO  | Milk Group | Study Arm | Postmenstrual Age (weeks) | N  | HMO Concentration (mg/L) |       |       |       |          |                  |                  |
|------|------------|-----------|---------------------------|----|--------------------------|-------|-------|-------|----------|------------------|------------------|
|      |            |           |                           |    | min *                    | max   | mean  | sd    | median * | Quartile 1 (25%) | Quartile 3 (75%) |
| LSTc | G1         | PRE-TERM  | 38                        | 11 | 20.21                    | 211.2 | 109.6 | 60.36 | 100.7    | 73.21            | 146.6            |
| LSTc | G1         | PRE-TERM  | 39                        | 16 | 42.87                    | 211.9 | 101.3 | 49.15 | 81.25    | 64.69            | 120.4            |
| LSTc | G1         | PRE-TERM  | 40                        | 7  | 61.08                    | 151.3 | 93.35 | 34.97 | 94.65    | 61.32            | 111.9            |
| LSTc | G1         | PRE-TERM  | 41                        | 12 | 26.24                    | 209.1 | 78.50 | 46.77 | 74.81    | 50.74            | 84.57            |
| LSTc | G1         | PRE-TERM  | 42                        | 6  | 46.32                    | 125.3 | 71.96 | 30.67 | 61.96    | 49.32            | 83.84            |
| LSTc | G1         | PRE-TERM  | 43                        | 10 | 10.91                    | 91.88 | 43.52 | 22.87 | 39.93    | 32.40            | 52.66            |
| LSTc | G1         | PRE-TERM  | 44                        | 5  | 34.47                    | 100.6 | 66.66 | 29.08 | 64.75    | 42.32            | 91.13            |
| LSTc | G1         | PRE-TERM  | 45                        | 9  | 9.258                    | 102.5 | 39.78 | 34.11 | 24.93    | 15.41            | 62.63            |
| LSTc | G1         | PRE-TERM  | 46                        | 6  | 22.75                    | 68.68 | 46.54 | 18.40 | 47.81    | 32.89            | 60.14            |
| LSTc | G1         | PRE-TERM  | 47                        | 3  | 12.11                    | 96.78 | 44.70 | 45.57 | 25.21    | 18.66            | 61.00            |
| LSTc | G1         | PRE-TERM  | 48                        | 4  | 14.03                    | 67.61 | 37.09 | 24.43 | 33.36    | 19.36            | 51.09            |
| LSTc | G1         | TERM      | 38                        | 2  | 329.6                    | 575.3 | 452.4 | 173.7 | 452.4    | 391.0            | 513.9            |
| LSTc | G1         | TERM      | 39                        | 9  | 215.4                    | 1199  | 571.2 | 321.7 | 468.6    | 344.4            | 657.9            |
| LSTc | G1         | TERM      | 40                        | 13 | 36.80                    | 1169  | 555.8 | 366.1 | 461.0    | 301.8            | 743.7            |
| LSTc | G1         | TERM      | 41                        | 21 | 108.9                    | 779.2 | 466.0 | 183.9 | 497.8    | 391.5            | 530.5            |
| LSTc | G1         | TERM      | 42                        | 21 | 82.02                    | 524.8 | 313.8 | 112.0 | 349.3    | 218.2            | 391.9            |
| LSTc | G1         | TERM      | 43                        | 21 | 71.57                    | 367.7 | 226.2 | 84.17 | 232.1    | 153.9            | 295.8            |
| LSTc | G1         | TERM      | 44                        | 20 | 63.36                    | 254.9 | 163.0 | 49.50 | 166.0    | 125.2            | 199.9            |
| LSTc | G1         | TERM      | 45                        | 21 | 50.54                    | 282.9 | 144.0 | 70.56 | 120.9    | 96.17            | 182.7            |
| LSTc | G1         | TERM      | 46                        | 17 | 30.28                    | 261.1 | 122.3 | 58.51 | 108.7    | 92.94            | 126.1            |
| LSTc | G1         | TERM      | 47                        | 12 | 36.24                    | 221.6 | 108.4 | 58.06 | 76.99    | 70.23            | 159.6            |
| LSTc | G1         | TERM      | 48                        | 6  | 37.33                    | 141.6 | 68.14 | 37.05 | 58.68    | 52.64            | 61.13            |
| LSTc | G2         | PRE-TERM  | 29                        | 1  | 184.0                    | 184.0 | 184.0 | NA    | 184.0    | 184.0            | 184.0            |
| LSTc | G2         | PRE-TERM  | 30                        | 2  | 95.07                    | 132.4 | 113.7 | 26.38 | 113.7    | 104.4            | 123.1            |
| LSTc | G2         | PRE-TERM  | 31                        | 2  | 55.00                    | 142.3 | 98.65 | 61.73 | 98.65    | 76.83            | 120.5            |
| LSTc | G2         | PRE-TERM  | 32                        | 3  | 41.80                    | 182.8 | 107.2 | 71.07 | 97.02    | 69.41            | 139.9            |
| LSTc | G2         | PRE-TERM  | 33                        | 5  | 30.60                    | 693.6 | 262.4 | 264.1 | 176.2    | 92.70            | 318.9            |
| LSTc | G2         | PRE-TERM  | 34                        | 5  | 24.49                    | 248.2 | 140.3 | 98.04 | 101.3    | 90.38            | 237.1            |
| LSTc | G2         | PRE-TERM  | 35                        | 5  | 23.78                    | 233.7 | 120.8 | 83.88 | 90.27    | 78.40            | 177.8            |
| LSTc | G2         | PRE-TERM  | 36                        | 5  | 17.24                    | 129.5 | 76.22 | 42.74 | 75.30    | 57.53            | 101.6            |
| LSTc | G2         | PRE-TERM  | 37                        | 4  | 17.82                    | 119.0 | 68.34 | 41.88 | 68.26    | 49.36            | 87.24            |
| LSTc | G2         | PRE-TERM  | 38                        | 4  | 36.77                    | 110.0 | 69.22 | 32.17 | 65.09    | 47.97            | 86.35            |
| LSTc | G2         | PRE-TERM  | 39                        | 3  | 22.11                    | 67.76 | 47.02 | 23.11 | 51.20    | 36.65            | 59.48            |
| LSTc | G2         | PRE-TERM  | 40                        | 3  | 36.31                    | 58.60 | 46.15 | 11.37 | 43.54    | 39.93            | 51.07            |
| LSTc | G2         | PRE-TERM  | 41                        | 2  | 28.57                    | 33.53 | 31.05 | 3.512 | 31.05    | 29.81            | 32.29            |
| LSTc | G2         | PRE-TERM  | 42                        | 3  | 28.83                    | 47.41 | 38.61 | 9.330 | 39.60    | 34.21            | 43.50            |

**Table S4 Concentration of Human Milk Oligosaccharides in Term or Preterm Milk At Specified Postmenstrual Age Separated By Milk Group**

\* When there are results below the method limit of quantification (LoQ) the result has been assigned value of  $0.5 \times \text{LoQ}$ , hence the minimum value appears to be the same in many cases. When a large number of datapoints are below LoQ this can also have the effect that the median = minimum.

| HMO  | Milk Group | Study Arm | Postmenstrual Age (weeks) | N | HMO Concentration (mg/L) |       |       |       |          |                  |                  |
|------|------------|-----------|---------------------------|---|--------------------------|-------|-------|-------|----------|------------------|------------------|
|      |            |           |                           |   | min *                    | max   | mean  | sd    | median * | Quartile 1 (25%) | Quartile 3 (75%) |
| LSTc | G2         | PRE-TERM  | 43                        | 2 | 15.48                    | 35.01 | 25.25 | 13.81 | 25.25    | 20.36            | 30.13            |
| LSTc | G2         | PRE-TERM  | 44                        | 3 | 22.05                    | 30.95 | 27.14 | 4.584 | 28.41    | 25.23            | 29.68            |
| LSTc | G2         | PRE-TERM  | 45                        | 2 | 11.60                    | 22.43 | 17.02 | 7.660 | 17.02    | 14.31            | 19.73            |
| LSTc | G2         | PRE-TERM  | 46                        | 2 | 25.88                    | 35.59 | 30.73 | 6.861 | 30.73    | 28.31            | 33.16            |
| LSTc | G2         | PRE-TERM  | 48                        | 1 | 18.59                    | 18.59 | 18.59 | NA    | 18.59    | 18.59            | 18.59            |
| LSTc | G2         | TERM      | 39                        | 1 | 517.1                    | 517.1 | 517.1 | NA    | 517.1    | 517.1            | 517.1            |
| LSTc | G2         | TERM      | 40                        | 5 | 204.1                    | 761.3 | 428.2 | 219.8 | 347.0    | 302.5            | 526.1            |
| LSTc | G2         | TERM      | 41                        | 4 | 103.3                    | 398.1 | 274.9 | 127.5 | 299.0    | 221.0            | 352.9            |
| LSTc | G2         | TERM      | 42                        | 6 | 64.34                    | 316.4 | 192.9 | 85.25 | 193.9    | 158.4            | 230.1            |
| LSTc | G2         | TERM      | 43                        | 5 | 32.73                    | 151.8 | 108.3 | 45.47 | 114.3    | 109.1            | 133.4            |
| LSTc | G2         | TERM      | 44                        | 5 | 30.19                    | 129.5 | 85.86 | 38.83 | 86.73    | 69.49            | 113.4            |
| LSTc | G2         | TERM      | 45                        | 5 | 20.07                    | 135.6 | 75.93 | 47.17 | 91.63    | 36.34            | 95.98            |
| LSTc | G2         | TERM      | 46                        | 5 | 16.92                    | 91.63 | 51.68 | 27.40 | 52.74    | 39.15            | 57.98            |
| LSTc | G2         | TERM      | 47                        | 4 | 37.96                    | 86.93 | 55.52 | 21.91 | 48.61    | 42.19            | 61.94            |
| LSTc | G3         | PRE-TERM  | 30                        | 1 | 526.1                    | 526.1 | 526.1 | NA    | 526.1    | 526.1            | 526.1            |
| LSTc | G3         | PRE-TERM  | 31                        | 1 | 303.7                    | 303.7 | 303.7 | NA    | 303.7    | 303.7            | 303.7            |
| LSTc | G3         | PRE-TERM  | 32                        | 1 | 136.2                    | 136.2 | 136.2 | NA    | 136.2    | 136.2            | 136.2            |
| LSTc | G3         | PRE-TERM  | 33                        | 1 | 87.33                    | 87.33 | 87.33 | NA    | 87.33    | 87.33            | 87.33            |
| LSTc | G3         | PRE-TERM  | 34                        | 1 | 62.73                    | 62.73 | 62.73 | NA    | 62.73    | 62.73            | 62.73            |
| LSTc | G3         | PRE-TERM  | 35                        | 1 | 71.54                    | 71.54 | 71.54 | NA    | 71.54    | 71.54            | 71.54            |
| LSTc | G3         | PRE-TERM  | 36                        | 1 | 42.20                    | 42.20 | 42.20 | NA    | 42.20    | 42.20            | 42.20            |
| LSTc | G3         | PRE-TERM  | 37                        | 1 | 38.50                    | 38.50 | 38.50 | NA    | 38.50    | 38.50            | 38.50            |
| LSTc | G3         | PRE-TERM  | 39                        | 1 | 24.55                    | 24.55 | 24.55 | NA    | 24.55    | 24.55            | 24.55            |
| LSTc | G3         | PRE-TERM  | 41                        | 1 | 20.28                    | 20.28 | 20.28 | NA    | 20.28    | 20.28            | 20.28            |
| LSTc | G3         | PRE-TERM  | 43                        | 1 | 24.47                    | 24.47 | 24.47 | NA    | 24.47    | 24.47            | 24.47            |
| LSTc | G3         | PRE-TERM  | 45                        | 1 | 17.33                    | 17.33 | 17.33 | NA    | 17.33    | 17.33            | 17.33            |
| LSTc | G3         | TERM      | 41                        | 1 | 853.8                    | 853.8 | 853.8 | NA    | 853.8    | 853.8            | 853.8            |
| LSTc | G3         | TERM      | 42                        | 1 | 298.2                    | 298.2 | 298.2 | NA    | 298.2    | 298.2            | 298.2            |
| LSTc | G3         | TERM      | 43                        | 1 | 193.2                    | 193.2 | 193.2 | NA    | 193.2    | 193.2            | 193.2            |
| LSTc | G3         | TERM      | 44                        | 1 | 139.1                    | 139.1 | 139.1 | NA    | 139.1    | 139.1            | 139.1            |
| LSTc | G3         | TERM      | 45                        | 1 | 97.32                    | 97.32 | 97.32 | NA    | 97.32    | 97.32            | 97.32            |
| LSTc | G3         | TERM      | 46                        | 1 | 73.72                    | 73.72 | 73.72 | NA    | 73.72    | 73.72            | 73.72            |
| LSTc | G3         | TERM      | 47                        | 1 | 62.70                    | 62.70 | 62.70 | NA    | 62.70    | 62.70            | 62.70            |
| LSTc | G3         | TERM      | 48                        | 1 | 76.90                    | 76.90 | 76.90 | NA    | 76.90    | 76.90            | 76.90            |
| LSTc | G4         | TERM      | 40                        | 1 | 979.8                    | 979.8 | 979.8 | NA    | 979.8    | 979.8            | 979.8            |
| LSTc | G4         | TERM      | 41                        | 1 | 1156                     | 1156  | 1156  | NA    | 1156     | 1156             | 1156             |

**Table S4 Concentration of Human Milk Oligosaccharides in Term or Preterm Milk At Specified Postmenstrual Age Separated By Milk Group**

\* When there are results below the method limit of quantification (LoQ) the result has been assigned value of  $0.5 \times \text{LoQ}$ , hence the minimum value appears to be the same in many cases. When a large number of datapoints are below LoQ this can also have the effect that the median = minimum.

| HMO       | Milk Group | Study Arm | Postmenstrual Age (weeks) | N  | HMO Concentration (mg/L) |       |       |       |          |                  |                  |
|-----------|------------|-----------|---------------------------|----|--------------------------|-------|-------|-------|----------|------------------|------------------|
|           |            |           |                           |    | min *                    | max   | mean  | sd    | median * | Quartile 1 (25%) | Quartile 3 (75%) |
| LSTc      | G4         | TERM      | 42                        | 1  | 620.3                    | 620.3 | 620.3 | NA    | 620.3    | 620.3            | 620.3            |
| LSTc      | G4         | TERM      | 43                        | 1  | 346.2                    | 346.2 | 346.2 | NA    | 346.2    | 346.2            | 346.2            |
| LSTc      | G4         | TERM      | 44                        | 1  | 188.7                    | 188.7 | 188.7 | NA    | 188.7    | 188.7            | 188.7            |
| LSTc      | G4         | TERM      | 45                        | 1  | 160.6                    | 160.6 | 160.6 | NA    | 160.6    | 160.6            | 160.6            |
| LSTc      | G4         | TERM      | 46                        | 1  | 96.53                    | 96.53 | 96.53 | NA    | 96.53    | 96.53            | 96.53            |
| LSTc      | G4         | TERM      | 47                        | 1  | 57.77                    | 57.77 | 57.77 | NA    | 57.77    | 57.77            | 57.77            |
| MFLNH-III | G1         | PRE-TERM  | 30                        | 7  | 70.38                    | 280.1 | 183.4 | 75.91 | 218.0    | 127.7            | 229.9            |
| MFLNH-III | G1         | PRE-TERM  | 31                        | 9  | 58.75                    | 649.8 | 360.5 | 190.1 | 336.7    | 231.3            | 508.1            |
| MFLNH-III | G1         | PRE-TERM  | 32                        | 13 | 98.01                    | 663.0 | 344.6 | 167.5 | 325.6    | 226.5            | 423.2            |
| MFLNH-III | G1         | PRE-TERM  | 33                        | 18 | 71.20                    | 604.0 | 323.0 | 163.7 | 338.0    | 196.2            | 424.1            |
| MFLNH-III | G1         | PRE-TERM  | 34                        | 19 | 65.81                    | 575.2 | 287.8 | 147.9 | 290.7    | 170.4            | 386.5            |
| MFLNH-III | G1         | PRE-TERM  | 35                        | 18 | 64.26                    | 445.5 | 265.8 | 97.04 | 263.7    | 225.8            | 335.9            |
| MFLNH-III | G1         | PRE-TERM  | 36                        | 19 | 105.8                    | 508.6 | 296.0 | 98.03 | 306.7    | 226.5            | 347.8            |
| MFLNH-III | G1         | PRE-TERM  | 37                        | 18 | 86.37                    | 422.1 | 252.0 | 92.90 | 240.4    | 184.9            | 323.8            |
| MFLNH-III | G1         | PRE-TERM  | 38                        | 11 | 64.97                    | 343.6 | 184.4 | 84.16 | 152.3    | 131.1            | 245.0            |
| MFLNH-III | G1         | PRE-TERM  | 39                        | 16 | 58.71                    | 294.7 | 174.9 | 82.30 | 162.5    | 123.6            | 260.6            |
| MFLNH-III | G1         | PRE-TERM  | 40                        | 7  | 79.18                    | 420.5 | 198.3 | 125.8 | 143.5    | 104.7            | 267.9            |
| MFLNH-III | G1         | PRE-TERM  | 41                        | 12 | 17.50                    | 271.6 | 95.13 | 63.96 | 92.70    | 56.82            | 110.9            |
| MFLNH-III | G1         | PRE-TERM  | 42                        | 6  | 50.65                    | 321.8 | 176.6 | 93.50 | 152.0    | 143.4            | 219.9            |
| MFLNH-III | G1         | PRE-TERM  | 43                        | 10 | 17.50                    | 323.4 | 107.1 | 83.81 | 87.46    | 66.40            | 117.9            |
| MFLNH-III | G1         | PRE-TERM  | 44                        | 5  | 81.42                    | 176.8 | 131.4 | 39.78 | 126.0    | 107.3            | 165.5            |
| MFLNH-III | G1         | PRE-TERM  | 45                        | 9  | 17.50                    | 199.1 | 81.13 | 53.67 | 75.23    | 46.68            | 81.30            |
| MFLNH-III | G1         | PRE-TERM  | 46                        | 6  | 68.19                    | 215.4 | 112.4 | 52.73 | 101.1    | 84.55            | 107.4            |
| MFLNH-III | G1         | PRE-TERM  | 47                        | 3  | 49.98                    | 185.3 | 107.4 | 69.94 | 86.82    | 68.40            | 136.0            |
| MFLNH-III | G1         | PRE-TERM  | 48                        | 4  | 17.50                    | 193.4 | 89.14 | 75.45 | 72.82    | 46.67            | 115.3            |
| MFLNH-III | G1         | TERM      | 38                        | 2  | 137.0                    | 188.4 | 162.7 | 36.40 | 162.7    | 149.8            | 175.6            |
| MFLNH-III | G1         | TERM      | 39                        | 9  | 17.50                    | 469.8 | 196.2 | 160.4 | 144.4    | 66.26            | 325.9            |
| MFLNH-III | G1         | TERM      | 40                        | 13 | 90.03                    | 613.8 | 266.8 | 144.8 | 236.2    | 152.2            | 332.4            |
| MFLNH-III | G1         | TERM      | 41                        | 21 | 121.3                    | 578.2 | 308.8 | 110.7 | 327.9    | 201.0            | 369.3            |
| MFLNH-III | G1         | TERM      | 42                        | 21 | 194.2                    | 552.7 | 354.1 | 100.2 | 332.1    | 309.3            | 408.7            |
| MFLNH-III | G1         | TERM      | 43                        | 21 | 81.47                    | 571.1 | 316.9 | 127.6 | 312.7    | 231.1            | 388.2            |
| MFLNH-III | G1         | TERM      | 44                        | 20 | 17.50                    | 483.7 | 278.1 | 128.4 | 292.2    | 187.7            | 350.3            |
| MFLNH-III | G1         | TERM      | 45                        | 21 | 17.50                    | 417.6 | 244.4 | 109.7 | 245.1    | 151.0            | 314.5            |
| MFLNH-III | G1         | TERM      | 46                        | 17 | 17.50                    | 443.9 | 222.3 | 99.15 | 216.6    | 151.6            | 281.6            |
| MFLNH-III | G1         | TERM      | 47                        | 12 | 57.71                    | 382.8 | 219.9 | 88.06 | 207.6    | 160.9            | 284.6            |
| MFLNH-III | G1         | TERM      | 48                        | 6  | 108.5                    | 289.1 | 197.3 | 61.11 | 193.6    | 172.3            | 223.7            |

**Table S4 Concentration of Human Milk Oligosaccharides in Term or Preterm Milk At Specified Postmenstrual Age Separated By Milk Group**

\* When there are results below the method limit of quantification (LoQ) the result has been assigned value of  $0.5 \times \text{LoQ}$ , hence the minimum value appears to be the same in many cases. When a large number of datapoints are below LoQ this can also have the effect that the median = minimum.

| HMO       | Milk Group | Study Arm | Postmenstrual Age (weeks) | N | HMO Concentration (mg/L) |       |       |       |          |                  |                  |
|-----------|------------|-----------|---------------------------|---|--------------------------|-------|-------|-------|----------|------------------|------------------|
|           |            |           |                           |   | min *                    | max   | mean  | sd    | median * | Quartile 1 (25%) | Quartile 3 (75%) |
| MFLNH-III | G2         | PRE-TERM  | 29                        | 1 | 166.0                    | 166.0 | 166.0 | NA    | 166.0    | 166.0            | 166.0            |
| MFLNH-III | G2         | PRE-TERM  | 30                        | 2 | 186.2                    | 437.6 | 311.9 | 177.7 | 311.9    | 249.1            | 374.8            |
| MFLNH-III | G2         | PRE-TERM  | 31                        | 2 | 147.0                    | 724.8 | 435.9 | 408.5 | 435.9    | 291.5            | 580.3            |
| MFLNH-III | G2         | PRE-TERM  | 32                        | 3 | 165.4                    | 743.2 | 367.6 | 325.6 | 194.1    | 179.8            | 468.7            |
| MFLNH-III | G2         | PRE-TERM  | 33                        | 5 | 141.6                    | 820.2 | 426.5 | 259.6 | 327.0    | 313.5            | 530.3            |
| MFLNH-III | G2         | PRE-TERM  | 34                        | 5 | 101.4                    | 856.2 | 513.3 | 294.1 | 517.0    | 377.6            | 714.1            |
| MFLNH-III | G2         | PRE-TERM  | 35                        | 5 | 116.0                    | 790.5 | 492.3 | 280.4 | 454.4    | 355.5            | 745.1            |
| MFLNH-III | G2         | PRE-TERM  | 36                        | 5 | 77.34                    | 753.0 | 464.6 | 259.3 | 454.7    | 397.0            | 640.9            |
| MFLNH-III | G2         | PRE-TERM  | 37                        | 4 | 66.95                    | 438.0 | 311.1 | 166.4 | 369.8    | 282.3            | 398.6            |
| MFLNH-III | G2         | PRE-TERM  | 38                        | 4 | 304.9                    | 707.1 | 471.0 | 187.1 | 436.1    | 329.6            | 577.5            |
| MFLNH-III | G2         | PRE-TERM  | 39                        | 3 | 261.1                    | 492.1 | 409.9 | 129.0 | 476.4    | 368.8            | 484.2            |
| MFLNH-III | G2         | PRE-TERM  | 40                        | 3 | 286.7                    | 551.6 | 415.9 | 132.6 | 409.3    | 348.0            | 480.5            |
| MFLNH-III | G2         | PRE-TERM  | 41                        | 2 | 78.50                    | 279.2 | 178.8 | 141.9 | 178.8    | 128.7            | 229.0            |
| MFLNH-III | G2         | PRE-TERM  | 42                        | 3 | 221.7                    | 386.3 | 284.5 | 88.91 | 245.5    | 233.6            | 315.9            |
| MFLNH-III | G2         | PRE-TERM  | 43                        | 2 | 50.63                    | 58.13 | 54.38 | 5.299 | 54.38    | 52.51            | 56.25            |
| MFLNH-III | G2         | PRE-TERM  | 44                        | 3 | 144.9                    | 337.9 | 257.1 | 100.3 | 288.3    | 216.6            | 313.1            |
| MFLNH-III | G2         | PRE-TERM  | 45                        | 2 | 53.16                    | 123.9 | 88.51 | 49.99 | 88.51    | 70.84            | 106.2            |
| MFLNH-III | G2         | PRE-TERM  | 46                        | 2 | 53.20                    | 324.5 | 188.8 | 191.8 | 188.8    | 121.0            | 256.6            |
| MFLNH-III | G2         | PRE-TERM  | 48                        | 1 | 231.9                    | 231.9 | 231.9 | NA    | 231.9    | 231.9            | 231.9            |
| MFLNH-III | G2         | TERM      | 39                        | 1 | 169.0                    | 169.0 | 169.0 | NA    | 169.0    | 169.0            | 169.0            |
| MFLNH-III | G2         | TERM      | 40                        | 5 | 17.50                    | 385.1 | 231.6 | 148.1 | 280.6    | 148.4            | 326.4            |
| MFLNH-III | G2         | TERM      | 41                        | 4 | 312.8                    | 772.4 | 617.3 | 206.6 | 692.0    | 591.9            | 717.4            |
| MFLNH-III | G2         | TERM      | 42                        | 6 | 339.0                    | 861.7 | 664.8 | 185.8 | 729.0    | 603.3            | 758.8            |
| MFLNH-III | G2         | TERM      | 43                        | 5 | 222.9                    | 976.4 | 711.0 | 287.8 | 806.8    | 722.0            | 826.8            |
| MFLNH-III | G2         | TERM      | 44                        | 5 | 194.8                    | 886.4 | 593.0 | 249.4 | 620.9    | 617.0            | 645.6            |
| MFLNH-III | G2         | TERM      | 45                        | 5 | 140.6                    | 758.8 | 405.4 | 232.2 | 393.8    | 273.3            | 460.5            |
| MFLNH-III | G2         | TERM      | 46                        | 5 | 17.50                    | 600.2 | 325.3 | 232.1 | 409.7    | 163.9            | 435.4            |
| MFLNH-III | G2         | TERM      | 47                        | 4 | 314.1                    | 875.6 | 494.8 | 256.9 | 394.8    | 365.3            | 524.2            |
| MFLNH-III | G3         | PRE-TERM  | 30                        | 1 | 452.0                    | 452.0 | 452.0 | NA    | 452.0    | 452.0            | 452.0            |
| MFLNH-III | G3         | PRE-TERM  | 31                        | 1 | 330.7                    | 330.7 | 330.7 | NA    | 330.7    | 330.7            | 330.7            |
| MFLNH-III | G3         | PRE-TERM  | 32                        | 1 | 314.2                    | 314.2 | 314.2 | NA    | 314.2    | 314.2            | 314.2            |
| MFLNH-III | G3         | PRE-TERM  | 33                        | 1 | 467.1                    | 467.1 | 467.1 | NA    | 467.1    | 467.1            | 467.1            |
| MFLNH-III | G3         | PRE-TERM  | 34                        | 1 | 454.7                    | 454.7 | 454.7 | NA    | 454.7    | 454.7            | 454.7            |
| MFLNH-III | G3         | PRE-TERM  | 35                        | 1 | 443.4                    | 443.4 | 443.4 | NA    | 443.4    | 443.4            | 443.4            |
| MFLNH-III | G3         | PRE-TERM  | 36                        | 1 | 370.4                    | 370.4 | 370.4 | NA    | 370.4    | 370.4            | 370.4            |
| MFLNH-III | G3         | PRE-TERM  | 37                        | 1 | 334.9                    | 334.9 | 334.9 | NA    | 334.9    | 334.9            | 334.9            |

**Table S4 Concentration of Human Milk Oligosaccharides in Term or Preterm Milk At Specified Postmenstrual Age Separated By Milk Group**

\* When there are results below the method limit of quantification (LoQ) the result has been assigned value of  $0.5 \times \text{LoQ}$ , hence the minimum value appears to be the same in many cases. When a large number of datapoints are below LoQ this can also have the effect that the median = minimum.

| HMO       | Milk Group | Study Arm | Postmenstrual Age (weeks) | N | HMO Concentration (mg/L) |       |       |    |          |                  |                  |
|-----------|------------|-----------|---------------------------|---|--------------------------|-------|-------|----|----------|------------------|------------------|
|           |            |           |                           |   | min *                    | max   | mean  | sd | median * | Quartile 1 (25%) | Quartile 3 (75%) |
| MFLNH-III | G3         | PRE-TERM  | 39                        | 1 | 246.6                    | 246.6 | 246.6 | NA | 246.6    | 246.6            | 246.6            |
| MFLNH-III | G3         | PRE-TERM  | 41                        | 1 | 180.9                    | 180.9 | 180.9 | NA | 180.9    | 180.9            | 180.9            |
| MFLNH-III | G3         | PRE-TERM  | 43                        | 1 | 140.0                    | 140.0 | 140.0 | NA | 140.0    | 140.0            | 140.0            |
| MFLNH-III | G3         | PRE-TERM  | 45                        | 1 | 102.0                    | 102.0 | 102.0 | NA | 102.0    | 102.0            | 102.0            |
| MFLNH-III | G3         | TERM      | 41                        | 1 | 524.0                    | 524.0 | 524.0 | NA | 524.0    | 524.0            | 524.0            |
| MFLNH-III | G3         | TERM      | 42                        | 1 | 493.2                    | 493.2 | 493.2 | NA | 493.2    | 493.2            | 493.2            |
| MFLNH-III | G3         | TERM      | 43                        | 1 | 593.9                    | 593.9 | 593.9 | NA | 593.9    | 593.9            | 593.9            |
| MFLNH-III | G3         | TERM      | 44                        | 1 | 496.9                    | 496.9 | 496.9 | NA | 496.9    | 496.9            | 496.9            |
| MFLNH-III | G3         | TERM      | 45                        | 1 | 574.6                    | 574.6 | 574.6 | NA | 574.6    | 574.6            | 574.6            |
| MFLNH-III | G3         | TERM      | 46                        | 1 | 355.1                    | 355.1 | 355.1 | NA | 355.1    | 355.1            | 355.1            |
| MFLNH-III | G3         | TERM      | 47                        | 1 | 369.9                    | 369.9 | 369.9 | NA | 369.9    | 369.9            | 369.9            |
| MFLNH-III | G3         | TERM      | 48                        | 1 | 299.2                    | 299.2 | 299.2 | NA | 299.2    | 299.2            | 299.2            |
| MFLNH-III | G4         | TERM      | 40                        | 1 | 189.9                    | 189.9 | 189.9 | NA | 189.9    | 189.9            | 189.9            |
| MFLNH-III | G4         | TERM      | 41                        | 1 | 695.9                    | 695.9 | 695.9 | NA | 695.9    | 695.9            | 695.9            |
| MFLNH-III | G4         | TERM      | 42                        | 1 | 934.4                    | 934.4 | 934.4 | NA | 934.4    | 934.4            | 934.4            |
| MFLNH-III | G4         | TERM      | 43                        | 1 | 895.2                    | 895.2 | 895.2 | NA | 895.2    | 895.2            | 895.2            |
| MFLNH-III | G4         | TERM      | 44                        | 1 | 872.4                    | 872.4 | 872.4 | NA | 872.4    | 872.4            | 872.4            |
| MFLNH-III | G4         | TERM      | 45                        | 1 | 513.6                    | 513.6 | 513.6 | NA | 513.6    | 513.6            | 513.6            |
| MFLNH-III | G4         | TERM      | 46                        | 1 | 571.8                    | 571.8 | 571.8 | NA | 571.8    | 571.8            | 571.8            |
| MFLNH-III | G4         | TERM      | 47                        | 1 | 427.0                    | 427.0 | 427.0 | NA | 427.0    | 427.0            | 427.0            |
