# Supplementary material for: Human Milk Oligosaccharides in the Milk of Mothers Delivering Term versus Preterm Infants
Source: MDPI journal article supplement (doi:10.3390/nu11061282), 2019-06-05
Supplement: s1 [file s1]

HMO concentration [mg/L]

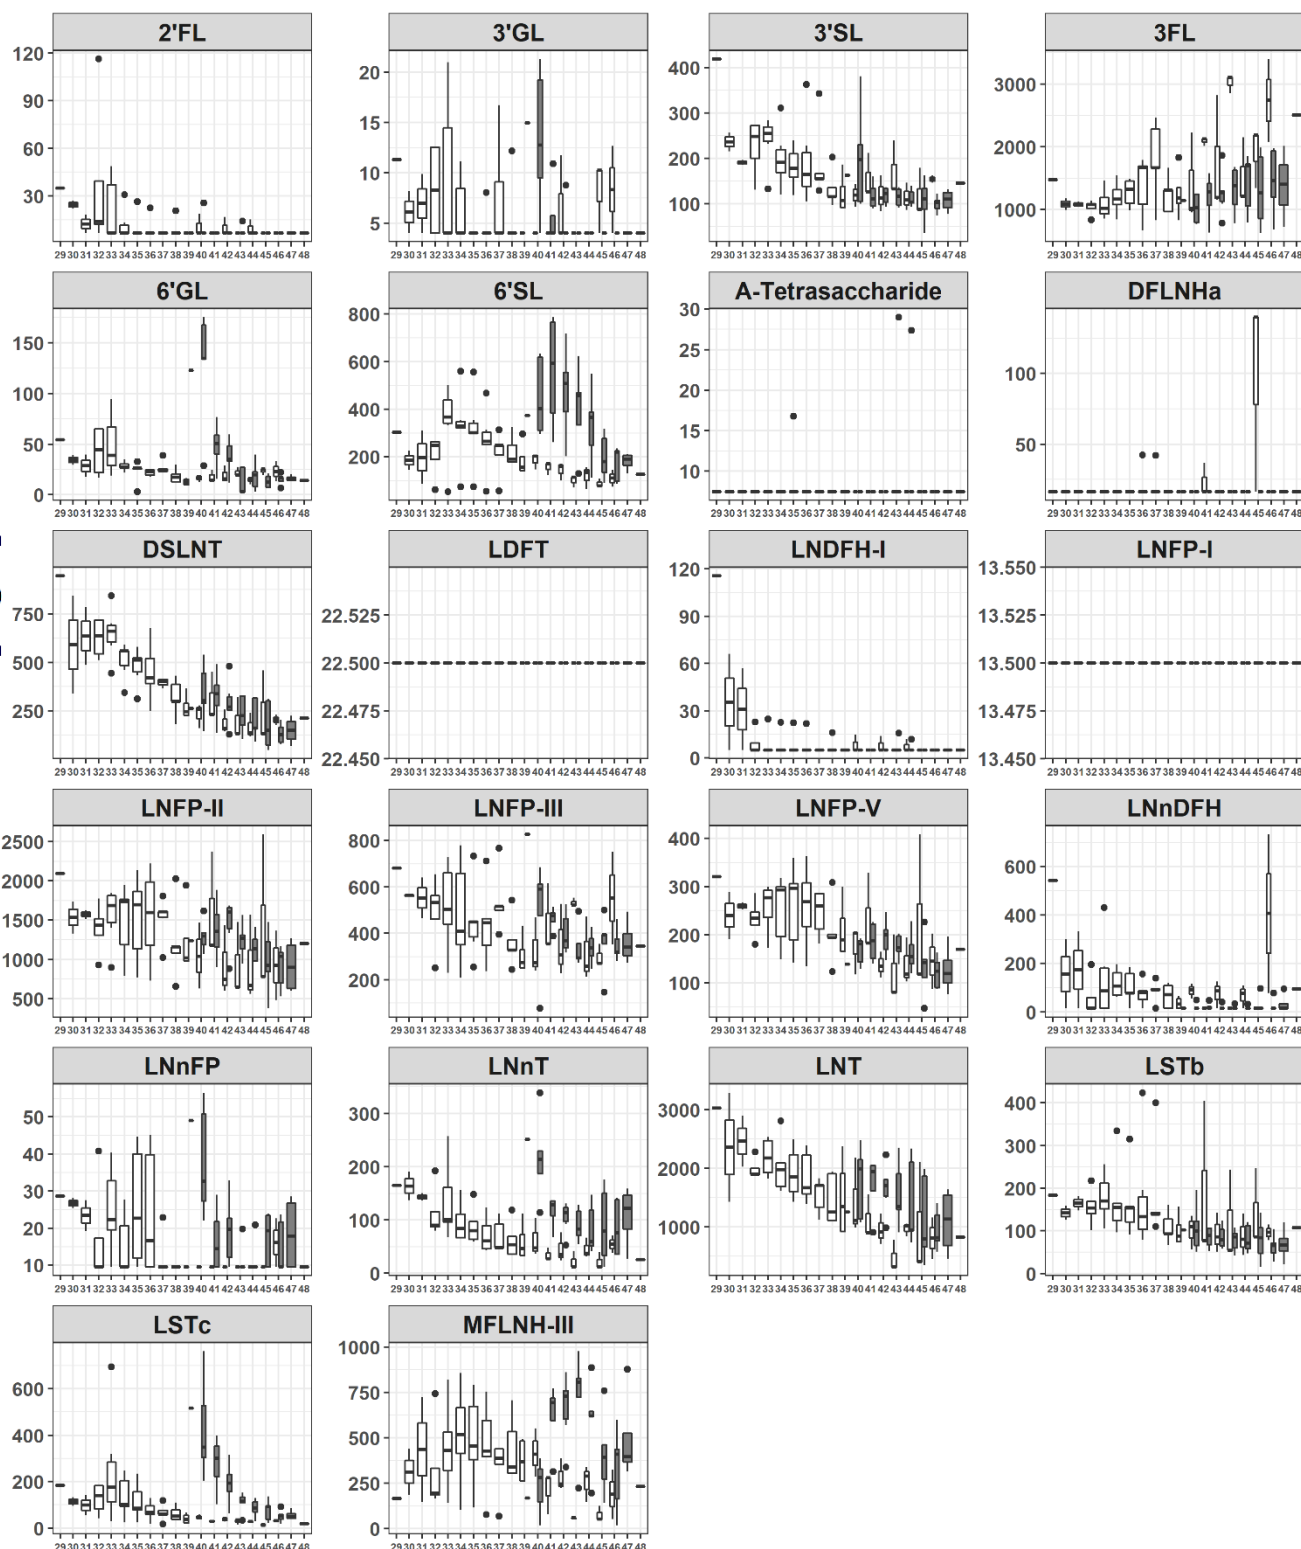

Milk group 2: Post menstrual age [weeks]

TERM STATUS ◻ PRE-TERM ◼ TERM

Figure S3: Mean concentration of each HMO in group 2 milk for term (grey) and preterm (white) infants at equivalent postmenstrual age.
