# Supplementary material for: Human Milk Oligosaccharides in the Milk of Mothers Delivering Term versus Preterm Infants
Source: MDPI journal article supplement (doi:10.3390/nu11061282), 2019-06-05
Supplement: s1 [file s1]

**Table S1 Concentration of Human Milk Oligosaccharides in Term or Preterm Milk At Different Weeks Postpartum**

*\* When there are results below the method limit of quantification (LoQ) the result has been assigned value of  $0.5 \times \text{LoQ}$ , hence the minimum value appears to be the same in many cases. When a large number of datapoints are below LoQ this can also have the effect that the median = minimum.*

| HMO  | Study Arm | HMO Concentration (mg/L) |    |       |       |       |       |          |                  |                  |
|------|-----------|--------------------------|----|-------|-------|-------|-------|----------|------------------|------------------|
|      |           | Week Post Partum         | N  | min * | max   | mean  | sd    | median * | Quartile 1 (25%) | Quartile 3 (75%) |
| 2'FL | PRE-TERM  | 1                        | 25 | 6.500 | 5478  | 2504  | 1633  | 2923     | 1402             | 3633             |
| 2'FL | PRE-TERM  | 2                        | 25 | 6.500 | 3465  | 1672  | 1124  | 1867     | 832.5            | 2606             |
| 2'FL | PRE-TERM  | 3                        | 25 | 6.500 | 2995  | 1582  | 1058  | 1723     | 824.5            | 2433             |
| 2'FL | PRE-TERM  | 4                        | 24 | 6.500 | 3592  | 1651  | 1146  | 1966     | 620.7            | 2414             |
| 2'FL | PRE-TERM  | 5                        | 25 | 6.500 | 3063  | 1595  | 1040  | 1815     | 944.5            | 2463             |
| 2'FL | PRE-TERM  | 6                        | 24 | 6.500 | 3335  | 1578  | 1133  | 1686     | 195.6            | 2519             |
| 2'FL | PRE-TERM  | 7                        | 24 | 6.500 | 2969  | 1533  | 1034  | 1714     | 722.5            | 2365             |
| 2'FL | PRE-TERM  | 8                        | 24 | 6.500 | 3353  | 1556  | 1084  | 1705     | 720.6            | 2378             |
| 2'FL | PRE-TERM  | 10                       | 23 | 6.500 | 3369  | 1499  | 999.1 | 1552     | 1019             | 2139             |
| 2'FL | PRE-TERM  | 12                       | 21 | 6.500 | 3574  | 1306  | 1032  | 1427     | 19.65            | 1921             |
| 2'FL | PRE-TERM  | 14                       | 21 | 6.500 | 2946  | 1294  | 1017  | 1323     | 32.90            | 2124             |
| 2'FL | PRE-TERM  | 16                       | 19 | 6.500 | 3455  | 1389  | 985.1 | 1461     | 767.1            | 2062             |
| 2'FL | TERM      | 1                        | 28 | 6.500 | 6076  | 3157  | 1908  | 3443     | 2673             | 4674             |
| 2'FL | TERM      | 2                        | 26 | 6.500 | 5572  | 2207  | 1429  | 2470     | 1746             | 3118             |
| 2'FL | TERM      | 3                        | 28 | 6.500 | 4390  | 2139  | 1328  | 2309     | 1699             | 2920             |
| 2'FL | TERM      | 4                        | 28 | 6.500 | 4556  | 2007  | 1250  | 2128     | 1525             | 2875             |
| 2'FL | TERM      | 5                        | 28 | 6.500 | 4090  | 1938  | 1247  | 2043     | 1499             | 2905             |
| 2'FL | TERM      | 6                        | 27 | 6.500 | 3666  | 1801  | 1187  | 1752     | 1137             | 2938             |
| 2'FL | TERM      | 7                        | 27 | 6.500 | 3530  | 1664  | 1135  | 1703     | 852.3            | 2567             |
| 2'FL | TERM      | 8                        | 28 | 6.500 | 4133  | 1621  | 1179  | 1650     | 596.7            | 2505             |
| 3'GL | PRE-TERM  | 1                        | 25 | 4.000 | 28.82 | 11.69 | 7.993 | 10.44    | 4.000            | 15.69            |
| 3'GL | PRE-TERM  | 2                        | 25 | 4.000 | 20.70 | 6.209 | 4.194 | 4.000    | 4.000            | 8.204            |
| 3'GL | PRE-TERM  | 3                        | 25 | 4.000 | 21.56 | 5.801 | 4.235 | 4.000    | 4.000            | 4.000            |
| 3'GL | PRE-TERM  | 4                        | 24 | 4.000 | 30.06 | 5.580 | 5.476 | 4.000    | 4.000            | 4.000            |
| 3'GL | PRE-TERM  | 5                        | 25 | 4.000 | 37.74 | 6.624 | 7.134 | 4.000    | 4.000            | 4.000            |
| 3'GL | PRE-TERM  | 6                        | 24 | 4.000 | 70.00 | 9.044 | 13.78 | 4.000    | 4.000            | 9.442            |
| 3'GL | PRE-TERM  | 7                        | 24 | 4.000 | 23.04 | 6.206 | 5.114 | 4.000    | 4.000            | 4.000            |
| 3'GL | PRE-TERM  | 8                        | 24 | 4.000 | 21.24 | 6.525 | 4.695 | 4.000    | 4.000            | 8.039            |
| 3'GL | PRE-TERM  | 10                       | 23 | 4.000 | 21.49 | 5.887 | 4.554 | 4.000    | 4.000            | 4.000            |

**Table S1 Concentration of Human Milk Oligosaccharides in Term or Preterm Milk At Different Weeks Postpartum**

*\* When there are results below the method limit of quantification (LoQ) the result has been assigned value of  $0.5 \times \text{LoQ}$ , hence the minimum value appears to be the same in many cases. When a large number of datapoints are below LoQ this can also have the effect that the median = minimum.*

| HMO  | Study Arm | HMO Concentration (mg/L) |    |       |       |       |       |          |                  |                  |
|------|-----------|--------------------------|----|-------|-------|-------|-------|----------|------------------|------------------|
|      |           | Week Post Partum         | N  | min * | max   | mean  | sd    | median * | Quartile 1 (25%) | Quartile 3 (75%) |
| 3'GL | PRE-TERM  | 12                       | 21 | 4.000 | 15.76 | 6.068 | 3.922 | 4.000    | 4.000            | 4.000            |
| 3'GL | PRE-TERM  | 14                       | 21 | 4.000 | 15.21 | 6.057 | 3.544 | 4.000    | 4.000            | 8.889            |
| 3'GL | PRE-TERM  | 16                       | 19 | 4.000 | 12.84 | 5.001 | 2.500 | 4.000    | 4.000            | 4.000            |
| 3'GL | TERM      | 1                        | 28 | 4.000 | 32.97 | 12.96 | 6.346 | 12.34    | 8.979            | 16.16            |
| 3'GL | TERM      | 2                        | 26 | 4.000 | 19.72 | 7.139 | 4.928 | 4.000    | 4.000            | 10.78            |
| 3'GL | TERM      | 3                        | 28 | 4.000 | 17.67 | 6.645 | 3.740 | 4.000    | 4.000            | 9.328            |
| 3'GL | TERM      | 4                        | 28 | 4.000 | 16.81 | 5.535 | 3.064 | 4.000    | 4.000            | 5.053            |
| 3'GL | TERM      | 5                        | 28 | 4.000 | 33.42 | 6.181 | 6.387 | 4.000    | 4.000            | 4.000            |
| 3'GL | TERM      | 6                        | 27 | 4.000 | 16.35 | 4.898 | 2.814 | 4.000    | 4.000            | 4.000            |
| 3'GL | TERM      | 7                        | 27 | 4.000 | 14.81 | 4.754 | 2.380 | 4.000    | 4.000            | 4.000            |
| 3'GL | TERM      | 8                        | 28 | 4.000 | 20.73 | 5.247 | 3.945 | 4.000    | 4.000            | 4.000            |
| 3'SL | PRE-TERM  | 1                        | 25 | 154.6 | 513.3 | 238.9 | 82.49 | 223.9    | 189.8            | 241.0            |
| 3'SL | PRE-TERM  | 2                        | 25 | 117.4 | 329.8 | 198.2 | 55.49 | 198.8    | 151.8            | 228.2            |
| 3'SL | PRE-TERM  | 3                        | 25 | 107.7 | 430.3 | 196.5 | 65.79 | 184.5    | 166.8            | 223.3            |
| 3'SL | PRE-TERM  | 4                        | 24 | 98.75 | 439.9 | 193.4 | 73.45 | 180.8    | 146.7            | 220.9            |
| 3'SL | PRE-TERM  | 5                        | 25 | 103.5 | 455.8 | 194.4 | 77.36 | 177.6    | 154.4            | 219.4            |
| 3'SL | PRE-TERM  | 6                        | 24 | 85.96 | 344.4 | 186.1 | 67.69 | 176.8    | 131.7            | 239.0            |
| 3'SL | PRE-TERM  | 7                        | 24 | 91.34 | 362.9 | 182.8 | 77.81 | 165.5    | 118.6            | 223.5            |
| 3'SL | PRE-TERM  | 8                        | 24 | 91.08 | 438.1 | 185.0 | 97.06 | 157.3    | 116.3            | 205.9            |
| 3'SL | PRE-TERM  | 10                       | 23 | 88.38 | 403.2 | 171.8 | 75.52 | 151.9    | 123.5            | 169.5            |
| 3'SL | PRE-TERM  | 12                       | 21 | 92.61 | 382.6 | 182.1 | 77.90 | 169.9    | 123.5            | 219.3            |
| 3'SL | PRE-TERM  | 14                       | 21 | 82.71 | 291.3 | 163.9 | 65.70 | 146.0    | 119.6            | 224.8            |
| 3'SL | PRE-TERM  | 16                       | 19 | 86.41 | 325.0 | 175.9 | 74.26 | 155.6    | 120.5            | 230.4            |
| 3'SL | TERM      | 1                        | 28 | 105.2 | 380.6 | 222.5 | 74.17 | 219.5    | 160.7            | 272.8            |
| 3'SL | TERM      | 2                        | 26 | 89.66 | 280.3 | 147.0 | 40.84 | 146.0    | 121.8            | 167.0            |
| 3'SL | TERM      | 3                        | 28 | 78.49 | 282.3 | 135.4 | 39.88 | 137.2    | 111.4            | 154.1            |
| 3'SL | TERM      | 4                        | 28 | 77.94 | 272.4 | 134.1 | 38.85 | 133.8    | 104.6            | 153.6            |
| 3'SL | TERM      | 5                        | 28 | 82.07 | 274.9 | 129.1 | 40.01 | 123.9    | 103.1            | 144.5            |
| 3'SL | TERM      | 6                        | 27 | 35.33 | 303.0 | 130.7 | 48.23 | 124.1    | 103.3            | 152.7            |

**Table S1 Concentration of Human Milk Oligosaccharides in Term or Preterm Milk At Different Weeks Postpartum**

*\* When there are results below the method limit of quantification (LoQ) the result has been assigned value of  $0.5 \times \text{LoQ}$ , hence the minimum value appears to be the same in many cases. When a large number of datapoints are below LoQ this can also have the effect that the median = minimum.*

| HMO  | Study Arm | HMO Concentration (mg/L) |    |       |       |       |       |          |                  |                  |
|------|-----------|--------------------------|----|-------|-------|-------|-------|----------|------------------|------------------|
|      |           | Week Post Partum         | N  | min * | max   | mean  | sd    | median * | Quartile 1 (25%) | Quartile 3 (75%) |
| 3'SL | TERM      | 7                        | 27 | 74.58 | 240.1 | 124.0 | 38.26 | 120.2    | 98.57            | 148.9            |
| 3'SL | TERM      | 8                        | 28 | 50.25 | 236.8 | 119.6 | 38.17 | 115.1    | 93.69            | 140.5            |
| 3FL  | PRE-TERM  | 1                        | 25 | 64.12 | 1472  | 461.1 | 405.7 | 246.6    | 186.2            | 515.3            |
| 3FL  | PRE-TERM  | 2                        | 25 | 148.3 | 1367  | 479.2 | 367.5 | 308.8    | 239.2            | 547.4            |
| 3FL  | PRE-TERM  | 3                        | 25 | 181.0 | 1359  | 565.8 | 375.5 | 404.7    | 305.3            | 616.5            |
| 3FL  | PRE-TERM  | 4                        | 24 | 158.0 | 1649  | 628.9 | 418.1 | 494.0    | 375.7            | 683.3            |
| 3FL  | PRE-TERM  | 5                        | 25 | 215.6 | 2284  | 729.5 | 497.7 | 516.1    | 428.2            | 829.2            |
| 3FL  | PRE-TERM  | 6                        | 24 | 75.94 | 1663  | 690.0 | 409.6 | 573.1    | 466.0            | 873.5            |
| 3FL  | PRE-TERM  | 7                        | 24 | 232.4 | 1825  | 757.7 | 423.4 | 632.8    | 506.1            | 867.7            |
| 3FL  | PRE-TERM  | 8                        | 24 | 224.9 | 2465  | 830.9 | 538.5 | 700.4    | 547.9            | 910.1            |
| 3FL  | PRE-TERM  | 10                       | 23 | 241.8 | 2821  | 868.7 | 595.6 | 745.6    | 515.8            | 926.9            |
| 3FL  | PRE-TERM  | 12                       | 21 | 278.6 | 3101  | 1074  | 654.3 | 838.2    | 689.8            | 1202             |
| 3FL  | PRE-TERM  | 14                       | 21 | 298.6 | 3398  | 1205  | 823.2 | 865.1    | 653.8            | 1250             |
| 3FL  | PRE-TERM  | 16                       | 19 | 325.1 | 2505  | 1037  | 554.7 | 967.0    | 650.1            | 1180             |
| 3FL  | TERM      | 1                        | 28 | 39.33 | 1240  | 346.4 | 328.3 | 207.4    | 166.9            | 345.8            |
| 3FL  | TERM      | 2                        | 26 | 66.65 | 1361  | 455.7 | 381.4 | 305.1    | 212.6            | 443.6            |
| 3FL  | TERM      | 3                        | 28 | 82.63 | 1577  | 493.6 | 377.8 | 368.8    | 235.0            | 514.2            |
| 3FL  | TERM      | 4                        | 28 | 99.24 | 1861  | 557.8 | 435.2 | 410.9    | 269.4            | 640.6            |
| 3FL  | TERM      | 5                        | 28 | 95.34 | 1720  | 621.8 | 431.9 | 456.7    | 377.0            | 705.0            |
| 3FL  | TERM      | 6                        | 27 | 102.9 | 1983  | 683.0 | 434.9 | 538.7    | 439.9            | 783.6            |
| 3FL  | TERM      | 7                        | 27 | 118.2 | 1978  | 720.8 | 473.4 | 536.2    | 448.1            | 989.3            |
| 3FL  | TERM      | 8                        | 28 | 131.6 | 2013  | 725.8 | 489.6 | 543.3    | 459.9            | 804.6            |
| 6'GL | PRE-TERM  | 1                        | 25 | 39.10 | 156.4 | 86.74 | 29.58 | 81.58    | 75.28            | 104.1            |
| 6'GL | PRE-TERM  | 2                        | 25 | 17.55 | 80.30 | 42.88 | 15.72 | 40.93    | 31.35            | 51.04            |
| 6'GL | PRE-TERM  | 3                        | 25 | 16.66 | 61.99 | 33.86 | 11.85 | 32.89    | 25.85            | 39.49            |
| 6'GL | PRE-TERM  | 4                        | 24 | 18.30 | 57.48 | 29.78 | 11.07 | 25.41    | 21.74            | 33.27            |
| 6'GL | PRE-TERM  | 5                        | 25 | 16.16 | 96.94 | 29.85 | 16.34 | 25.75    | 21.56            | 30.35            |
| 6'GL | PRE-TERM  | 6                        | 24 | 3.150 | 179.6 | 31.70 | 33.08 | 25.25    | 19.44            | 30.44            |
| 6'GL | PRE-TERM  | 7                        | 24 | 11.33 | 43.71 | 22.49 | 9.416 | 18.39    | 15.21            | 26.61            |

**Table S1 Concentration of Human Milk Oligosaccharides in Term or Preterm Milk At Different Weeks Postpartum**

\* When there are results below the method limit of quantification (LoQ) the result has been assigned value of  $0.5 \times \text{LoQ}$ , hence the minimum value appears to be the same in many cases. When a large number of datapoints are below LoQ this can also have the effect that the median = minimum.

| HMO  | Study Arm | HMO Concentration (mg/L) |    |       |       |       |       |          |                  |                  |
|------|-----------|--------------------------|----|-------|-------|-------|-------|----------|------------------|------------------|
|      |           | Week Post Partum         | N  | min * | max   | mean  | sd    | median * | Quartile 1 (25%) | Quartile 3 (75%) |
| 6'GL | PRE-TERM  | 8                        | 24 | 7.746 | 59.26 | 22.25 | 11.18 | 18.91    | 14.64            | 25.77            |
| 6'GL | PRE-TERM  | 10                       | 23 | 9.255 | 48.40 | 20.02 | 9.070 | 17.89    | 13.98            | 22.46            |
| 6'GL | PRE-TERM  | 12                       | 21 | 6.997 | 44.84 | 19.92 | 9.116 | 17.17    | 13.83            | 24.69            |
| 6'GL | PRE-TERM  | 14                       | 21 | 8.465 | 52.92 | 19.11 | 10.17 | 15.52    | 12.97            | 22.66            |
| 6'GL | PRE-TERM  | 16                       | 19 | 3.150 | 46.05 | 16.45 | 9.199 | 14.07    | 11.70            | 20.14            |
| 6'GL | TERM      | 1                        | 28 | 53.98 | 234.0 | 128.2 | 46.10 | 118.9    | 99.42            | 154.1            |
| 6'GL | TERM      | 2                        | 26 | 12.64 | 94.87 | 53.25 | 20.51 | 50.45    | 38.31            | 68.33            |
| 6'GL | TERM      | 3                        | 28 | 8.541 | 59.24 | 36.37 | 12.85 | 34.45    | 29.50            | 45.54            |
| 6'GL | TERM      | 4                        | 28 | 3.150 | 59.96 | 26.99 | 13.04 | 27.01    | 19.04            | 36.29            |
| 6'GL | TERM      | 5                        | 28 | 3.150 | 68.27 | 23.44 | 13.82 | 21.06    | 17.05            | 29.50            |
| 6'GL | TERM      | 6                        | 27 | 3.150 | 39.81 | 19.79 | 8.848 | 18.16    | 14.78            | 25.80            |
| 6'GL | TERM      | 7                        | 27 | 3.150 | 38.09 | 18.74 | 8.369 | 16.93    | 14.22            | 23.12            |
| 6'GL | TERM      | 8                        | 28 | 3.150 | 47.47 | 17.71 | 10.64 | 14.55    | 11.59            | 21.24            |
| 6'SL | PRE-TERM  | 1                        | 25 | 103.1 | 1132  | 492.2 | 255.8 | 501.0    | 292.8            | 656.3            |
| 6'SL | PRE-TERM  | 2                        | 25 | 63.98 | 1135  | 505.5 | 279.6 | 559.2    | 266.6            | 654.3            |
| 6'SL | PRE-TERM  | 3                        | 25 | 61.39 | 926.1 | 455.1 | 228.0 | 489.0    | 309.8            | 639.8            |
| 6'SL | PRE-TERM  | 4                        | 24 | 53.89 | 705.7 | 395.5 | 174.6 | 432.2    | 288.0            | 531.3            |
| 6'SL | PRE-TERM  | 5                        | 25 | 74.89 | 569.3 | 320.4 | 138.9 | 331.6    | 218.7            | 417.6            |
| 6'SL | PRE-TERM  | 6                        | 24 | 10.00 | 534.3 | 291.3 | 136.9 | 317.6    | 190.5            | 385.9            |
| 6'SL | PRE-TERM  | 7                        | 24 | 55.02 | 524.7 | 247.5 | 117.8 | 253.4    | 150.7            | 315.7            |
| 6'SL | PRE-TERM  | 8                        | 24 | 57.52 | 476.6 | 226.2 | 105.3 | 208.7    | 145.3            | 287.2            |
| 6'SL | PRE-TERM  | 10                       | 23 | 91.24 | 309.4 | 174.0 | 65.07 | 163.8    | 119.9            | 190.7            |
| 6'SL | PRE-TERM  | 12                       | 21 | 65.69 | 256.2 | 143.5 | 49.62 | 140.1    | 105.5            | 184.7            |
| 6'SL | PRE-TERM  | 14                       | 21 | 60.09 | 212.2 | 111.6 | 43.37 | 99.71    | 77.58            | 145.4            |
| 6'SL | PRE-TERM  | 16                       | 19 | 46.43 | 196.6 | 99.87 | 44.93 | 97.87    | 60.33            | 129.2            |
| 6'SL | TERM      | 1                        | 28 | 222.0 | 794.7 | 497.6 | 141.8 | 469.7    | 396.2            | 621.3            |
| 6'SL | TERM      | 2                        | 26 | 311.3 | 1084  | 646.4 | 191.1 | 612.6    | 526.0            | 783.4            |
| 6'SL | TERM      | 3                        | 28 | 262.0 | 985.4 | 567.1 | 178.1 | 521.6    | 441.8            | 705.6            |
| 6'SL | TERM      | 4                        | 28 | 202.8 | 797.3 | 477.1 | 155.4 | 450.4    | 381.0            | 561.3            |

**Table S1 Concentration of Human Milk Oligosaccharides in Term or Preterm Milk At Different Weeks Postpartum**

*\* When there are results below the method limit of quantification (LoQ) the result has been assigned value of  $0.5 \times \text{LoQ}$ , hence the minimum value appears to be the same in many cases. When a large number of datapoints are below LoQ this can also have the effect that the median = minimum.*

| HMO               | Study Arm | HMO Concentration (mg/L) |    |       |       |       |       |          |                  |                  |
|-------------------|-----------|--------------------------|----|-------|-------|-------|-------|----------|------------------|------------------|
|                   |           | Week Post Partum         | N  | min * | max   | mean  | sd    | median * | Quartile 1 (25%) | Quartile 3 (75%) |
| 6'SL              | TERM      | 5                        | 28 | 24.60 | 693.3 | 357.8 | 151.5 | 342.7    | 299.7            | 397.6            |
| 6'SL              | TERM      | 6                        | 27 | 112.5 | 700.9 | 306.4 | 136.1 | 294.2    | 218.2            | 342.3            |
| 6'SL              | TERM      | 7                        | 27 | 89.66 | 662.3 | 257.7 | 135.0 | 227.1    | 173.3            | 281.3            |
| 6'SL              | TERM      | 8                        | 28 | 53.06 | 671.2 | 219.8 | 134.1 | 191.9    | 144.8            | 241.8            |
| A-Tetrasaccharide | PRE-TERM  | 1                        | 25 | 7.500 | 315.1 | 49.87 | 83.15 | 7.500    | 7.500            | 54.83            |
| A-Tetrasaccharide | PRE-TERM  | 2                        | 25 | 7.500 | 218.2 | 35.69 | 57.71 | 7.500    | 7.500            | 27.92            |
| A-Tetrasaccharide | PRE-TERM  | 3                        | 25 | 7.500 | 250.0 | 38.09 | 64.00 | 7.500    | 7.500            | 23.53            |
| A-Tetrasaccharide | PRE-TERM  | 4                        | 24 | 7.500 | 224.7 | 39.43 | 62.08 | 7.500    | 7.500            | 28.80            |
| A-Tetrasaccharide | PRE-TERM  | 5                        | 25 | 7.500 | 226.0 | 37.74 | 58.76 | 7.500    | 7.500            | 35.77            |
| A-Tetrasaccharide | PRE-TERM  | 6                        | 24 | 7.500 | 232.6 | 40.88 | 62.88 | 7.500    | 7.500            | 32.20            |
| A-Tetrasaccharide | PRE-TERM  | 7                        | 24 | 7.500 | 266.6 | 40.79 | 68.30 | 7.500    | 7.500            | 27.95            |
| A-Tetrasaccharide | PRE-TERM  | 8                        | 24 | 7.500 | 262.8 | 43.99 | 75.96 | 7.500    | 7.500            | 22.59            |
| A-Tetrasaccharide | PRE-TERM  | 10                       | 23 | 7.500 | 322.7 | 43.80 | 77.66 | 7.500    | 7.500            | 22.78            |
| A-Tetrasaccharide | PRE-TERM  | 12                       | 21 | 7.500 | 334.5 | 40.48 | 80.88 | 7.500    | 7.500            | 7.500            |
| A-Tetrasaccharide | PRE-TERM  | 14                       | 21 | 7.500 | 300.7 | 40.66 | 71.61 | 7.500    | 7.500            | 29.61            |
| A-Tetrasaccharide | PRE-TERM  | 16                       | 19 | 7.500 | 329.8 | 48.97 | 81.90 | 7.500    | 7.500            | 57.85            |
| A-Tetrasaccharide | TERM      | 1                        | 28 | 7.500 | 188.2 | 38.15 | 52.25 | 7.500    | 7.500            | 47.73            |
| A-Tetrasaccharide | TERM      | 2                        | 26 | 7.500 | 149.0 | 28.35 | 35.70 | 7.500    | 7.500            | 40.12            |
| A-Tetrasaccharide | TERM      | 3                        | 28 | 7.500 | 153.9 | 25.51 | 35.48 | 7.500    | 7.500            | 30.76            |
| A-Tetrasaccharide | TERM      | 4                        | 28 | 7.500 | 162.3 | 27.80 | 36.68 | 7.500    | 7.500            | 37.78            |
| A-Tetrasaccharide | TERM      | 5                        | 28 | 7.500 | 138.9 | 25.40 | 32.20 | 7.500    | 7.500            | 29.91            |
| A-Tetrasaccharide | TERM      | 6                        | 27 | 7.500 | 183.8 | 26.51 | 41.05 | 7.500    | 7.500            | 27.78            |
| A-Tetrasaccharide | TERM      | 7                        | 27 | 7.500 | 165.4 | 25.18 | 38.09 | 7.500    | 7.500            | 23.67            |
| A-Tetrasaccharide | TERM      | 8                        | 28 | 7.500 | 181.0 | 25.64 | 40.27 | 7.500    | 7.500            | 24.06            |
| DFLNHa            | PRE-TERM  | 1                        | 25 | 16.50 | 577.3 | 169.0 | 147.9 | 132.0    | 47.48            | 230.6            |
| DFLNHa            | PRE-TERM  | 2                        | 25 | 16.50 | 495.2 | 187.0 | 152.2 | 155.5    | 16.50            | 311.1            |
| DFLNHa            | PRE-TERM  | 3                        | 25 | 16.50 | 430.4 | 164.7 | 126.8 | 184.4    | 16.50            | 253.9            |
| DFLNHa            | PRE-TERM  | 4                        | 24 | 16.50 | 583.6 | 153.2 | 134.3 | 147.2    | 16.50            | 216.1            |
| DFLNHa            | PRE-TERM  | 5                        | 25 | 16.50 | 623.8 | 125.1 | 125.7 | 118.0    | 52.33            | 151.3            |

**Table S1 Concentration of Human Milk Oligosaccharides in Term or Preterm Milk At Different Weeks Postpartum**

\* When there are results below the method limit of quantification (LoQ) the result has been assigned value of  $0.5 \times \text{LoQ}$ , hence the minimum value appears to be the same in many cases. When a large number of datapoints are below LoQ this can also have the effect that the median = minimum.

| HMO    | Study Arm | HMO Concentration (mg/L) |    |       |       |       |       |          |                  |                  |
|--------|-----------|--------------------------|----|-------|-------|-------|-------|----------|------------------|------------------|
|        |           | Week Post Partum         | N  | min * | max   | mean  | sd    | median * | Quartile 1 (25%) | Quartile 3 (75%) |
| DFLNHa | PRE-TERM  | 6                        | 24 | 16.50 | 685.1 | 140.7 | 162.2 | 103.9    | 31.82            | 145.6            |
| DFLNHa | PRE-TERM  | 7                        | 24 | 16.50 | 418.7 | 97.66 | 94.38 | 77.90    | 35.96            | 119.6            |
| DFLNHa | PRE-TERM  | 8                        | 24 | 16.50 | 351.9 | 96.41 | 85.53 | 68.39    | 33.80            | 126.4            |
| DFLNHa | PRE-TERM  | 10                       | 23 | 16.50 | 249.7 | 53.43 | 53.14 | 37.05    | 16.50            | 75.45            |
| DFLNHa | PRE-TERM  | 12                       | 21 | 16.50 | 179.2 | 42.18 | 37.44 | 35.46    | 16.50            | 49.76            |
| DFLNHa | PRE-TERM  | 14                       | 21 | 16.50 | 139.6 | 41.28 | 29.94 | 39.21    | 16.50            | 53.54            |
| DFLNHa | PRE-TERM  | 16                       | 19 | 16.50 | 60.97 | 31.15 | 16.71 | 16.50    | 16.50            | 44.38            |
| DFLNHa | TERM      | 1                        | 28 | 16.50 | 488.4 | 139.5 | 113.4 | 142.0    | 49.77            | 182.3            |
| DFLNHa | TERM      | 2                        | 26 | 16.50 | 664.0 | 229.7 | 177.1 | 216.4    | 100.6            | 310.1            |
| DFLNHa | TERM      | 3                        | 28 | 16.50 | 759.1 | 223.0 | 174.1 | 219.6    | 96.56            | 321.9            |
| DFLNHa | TERM      | 4                        | 28 | 16.50 | 709.4 | 207.3 | 166.5 | 191.6    | 76.56            | 300.2            |
| DFLNHa | TERM      | 5                        | 28 | 16.50 | 747.0 | 174.6 | 163.0 | 135.3    | 64.30            | 264.9            |
| DFLNHa | TERM      | 6                        | 27 | 16.50 | 563.0 | 135.0 | 128.2 | 123.5    | 25.38            | 172.4            |
| DFLNHa | TERM      | 7                        | 27 | 16.50 | 525.5 | 106.9 | 111.2 | 76.69    | 16.50            | 125.0            |
| DFLNHa | TERM      | 8                        | 28 | 16.50 | 463.1 | 99.16 | 107.9 | 66.48    | 16.50            | 123.3            |
| DSLNT  | PRE-TERM  | 1                        | 25 | 17.50 | 946.4 | 422.7 | 231.9 | 394.9    | 271.2            | 531.0            |
| DSLNT  | PRE-TERM  | 2                        | 25 | 17.50 | 843.2 | 465.5 | 186.7 | 457.2    | 381.5            | 557.9            |
| DSLNT  | PRE-TERM  | 3                        | 25 | 169.1 | 908.0 | 467.8 | 197.8 | 433.2    | 337.3            | 555.3            |
| DSLNT  | PRE-TERM  | 4                        | 24 | 128.4 | 796.0 | 415.6 | 177.9 | 355.8    | 292.5            | 530.7            |
| DSLNT  | PRE-TERM  | 5                        | 25 | 129.9 | 811.9 | 378.1 | 178.7 | 334.8    | 248.2            | 443.0            |
| DSLNT  | PRE-TERM  | 6                        | 24 | 105.5 | 628.2 | 323.0 | 147.8 | 284.7    | 209.6            | 416.5            |
| DSLNT  | PRE-TERM  | 7                        | 24 | 100.2 | 677.8 | 306.1 | 157.3 | 277.3    | 185.3            | 366.9            |
| DSLNT  | PRE-TERM  | 8                        | 24 | 97.12 | 530.6 | 271.9 | 120.3 | 249.8    | 184.5            | 361.7            |
| DSLNT  | PRE-TERM  | 10                       | 23 | 84.32 | 435.1 | 222.5 | 98.47 | 191.0    | 159.3            | 256.2            |
| DSLNT  | PRE-TERM  | 12                       | 21 | 72.56 | 452.7 | 209.6 | 90.96 | 175.2    | 155.6            | 272.7            |
| DSLNT  | PRE-TERM  | 14                       | 21 | 97.17 | 321.5 | 185.0 | 67.76 | 169.3    | 132.9            | 235.7            |
| DSLNT  | PRE-TERM  | 16                       | 19 | 88.23 | 459.9 | 185.4 | 83.12 | 173.3    | 132.6            | 215.7            |
| DSLNT  | TERM      | 1                        | 28 | 163.6 | 697.9 | 361.2 | 126.2 | 338.8    | 271.7            | 418.0            |
| DSLNT  | TERM      | 2                        | 26 | 17.50 | 880.1 | 360.4 | 172.1 | 354.1    | 252.8            | 440.0            |

**Table S1 Concentration of Human Milk Oligosaccharides in Term or Preterm Milk At Different Weeks Postpartum**

*\* When there are results below the method limit of quantification (LoQ) the result has been assigned value of  $0.5 \times \text{LoQ}$ , hence the minimum value appears to be the same in many cases. When a large number of datapoints are below LoQ this can also have the effect that the median = minimum.*

| HMO     | Study Arm | HMO Concentration (mg/L) |    |       |       |       |       |          |                  |                  |
|---------|-----------|--------------------------|----|-------|-------|-------|-------|----------|------------------|------------------|
|         |           | Week Post Partum         | N  | min * | max   | mean  | sd    | median * | Quartile 1 (25%) | Quartile 3 (75%) |
| DSLNT   | TERM      | 3                        | 28 | 117.1 | 836.5 | 363.1 | 141.9 | 360.0    | 257.8            | 421.3            |
| DSLNT   | TERM      | 4                        | 28 | 94.18 | 630.2 | 305.7 | 115.8 | 324.5    | 224.4            | 364.2            |
| DSLNT   | TERM      | 5                        | 28 | 75.20 | 555.7 | 251.2 | 101.8 | 251.2    | 171.1            | 311.0            |
| DSLNT   | TERM      | 6                        | 27 | 48.35 | 426.1 | 231.5 | 100.0 | 218.2    | 165.3            | 308.3            |
| DSLNT   | TERM      | 7                        | 27 | 48.04 | 437.5 | 202.9 | 91.41 | 178.1    | 138.9            | 279.7            |
| DSLNT   | TERM      | 8                        | 28 | 60.14 | 422.7 | 172.9 | 77.97 | 166.7    | 117.0            | 216.0            |
| LDFT    | PRE-TERM  | 1                        | 25 | 22.50 | 1174  | 345.6 | 306.9 | 239.0    | 56.66            | 529.4            |
| LDFT    | PRE-TERM  | 2                        | 25 | 22.50 | 759.0 | 202.0 | 188.8 | 146.1    | 69.93            | 265.3            |
| LDFT    | PRE-TERM  | 3                        | 25 | 22.50 | 1926  | 268.6 | 419.8 | 164.7    | 89.82            | 255.1            |
| LDFT    | PRE-TERM  | 4                        | 24 | 22.50 | 2513  | 302.9 | 504.1 | 177.7    | 52.94            | 334.3            |
| LDFT    | PRE-TERM  | 5                        | 25 | 22.50 | 2072  | 294.0 | 420.2 | 212.7    | 72.07            | 337.6            |
| LDFT    | PRE-TERM  | 6                        | 24 | 22.50 | 987.2 | 286.2 | 275.8 | 215.8    | 76.99            | 367.5            |
| LDFT    | PRE-TERM  | 7                        | 24 | 22.50 | 2758  | 291.6 | 543.3 | 173.8    | 63.75            | 258.4            |
| LDFT    | PRE-TERM  | 8                        | 24 | 22.50 | 2333  | 353.9 | 575.4 | 184.7    | 63.59            | 317.4            |
| LDFT    | PRE-TERM  | 10                       | 23 | 22.50 | 1827  | 341.3 | 417.9 | 210.5    | 93.99            | 421.8            |
| LDFT    | PRE-TERM  | 12                       | 21 | 22.50 | 3003  | 455.1 | 730.3 | 249.3    | 22.50            | 459.8            |
| LDFT    | PRE-TERM  | 14                       | 21 | 22.50 | 1797  | 296.3 | 382.7 | 251.7    | 22.50            | 351.7            |
| LDFT    | PRE-TERM  | 16                       | 19 | 22.50 | 1825  | 419.3 | 456.1 | 305.0    | 123.2            | 508.1            |
| LDFT    | TERM      | 1                        | 28 | 22.50 | 983.9 | 340.4 | 286.8 | 314.3    | 101.5            | 487.9            |
| LDFT    | TERM      | 2                        | 26 | 22.50 | 732.1 | 255.1 | 198.5 | 239.8    | 87.03            | 349.7            |
| LDFT    | TERM      | 3                        | 28 | 22.50 | 965.0 | 258.1 | 232.9 | 217.8    | 124.7            | 332.7            |
| LDFT    | TERM      | 4                        | 28 | 22.50 | 549.3 | 202.5 | 140.4 | 211.1    | 108.3            | 271.3            |
| LDFT    | TERM      | 5                        | 28 | 22.50 | 1270  | 255.6 | 287.3 | 193.6    | 113.2            | 298.3            |
| LDFT    | TERM      | 6                        | 27 | 22.50 | 2907  | 298.5 | 534.6 | 197.9    | 115.7            | 305.8            |
| LDFT    | TERM      | 7                        | 27 | 22.50 | 1713  | 272.1 | 323.3 | 224.0    | 97.50            | 332.1            |
| LDFT    | TERM      | 8                        | 28 | 22.50 | 818.6 | 248.3 | 192.7 | 225.4    | 112.0            | 334.3            |
| LNDFH-I | PRE-TERM  | 1                        | 25 | 5.000 | 1781  | 975.6 | 660.0 | 1145     | 115.7            | 1518             |
| LNDFH-I | PRE-TERM  | 2                        | 25 | 5.000 | 1629  | 807.5 | 559.0 | 892.9    | 75.44            | 1222             |
| LNDFH-I | PRE-TERM  | 3                        | 25 | 5.000 | 2269  | 869.3 | 655.7 | 970.1    | 56.94            | 1391             |

**Table S1 Concentration of Human Milk Oligosaccharides in Term or Preterm Milk At Different Weeks Postpartum**

*\* When there are results below the method limit of quantification (LoQ) the result has been assigned value of  $0.5 \times \text{LoQ}$ , hence the minimum value appears to be the same in many cases. When a large number of datapoints are below LoQ this can also have the effect that the median = minimum.*

| HMO     | Study Arm | HMO Concentration (mg/L) |    |       |       |       |       |          |                  |                  |
|---------|-----------|--------------------------|----|-------|-------|-------|-------|----------|------------------|------------------|
|         |           | Week Post Partum         | N  | min * | max   | mean  | sd    | median * | Quartile 1 (25%) | Quartile 3 (75%) |
| LNDFH-I | PRE-TERM  | 4                        | 24 | 5.000 | 3123  | 871.2 | 751.9 | 919.2    | 36.13            | 1160             |
| LNDFH-I | PRE-TERM  | 5                        | 25 | 5.000 | 3161  | 907.7 | 764.2 | 1000     | 41.75            | 1220             |
| LNDFH-I | PRE-TERM  | 6                        | 24 | 5.000 | 1624  | 786.1 | 587.6 | 857.5    | 35.07            | 1239             |
| LNDFH-I | PRE-TERM  | 7                        | 24 | 5.000 | 1500  | 756.5 | 541.3 | 862.4    | 33.04            | 1178             |
| LNDFH-I | PRE-TERM  | 8                        | 24 | 5.000 | 1910  | 797.7 | 600.2 | 898.9    | 29.31            | 1179             |
| LNDFH-I | PRE-TERM  | 10                       | 23 | 5.000 | 1663  | 761.3 | 525.2 | 814.3    | 317.8            | 1105             |
| LNDFH-I | PRE-TERM  | 12                       | 21 | 5.000 | 1606  | 699.4 | 572.6 | 751.4    | 14.75            | 1159             |
| LNDFH-I | PRE-TERM  | 14                       | 21 | 5.000 | 1768  | 636.4 | 524.6 | 630.9    | 14.03            | 1048             |
| LNDFH-I | PRE-TERM  | 16                       | 19 | 5.000 | 1431  | 647.2 | 455.3 | 676.3    | 282.1            | 970.2            |
| LNDFH-I | TERM      | 1                        | 28 | 5.000 | 2122  | 943.1 | 652.9 | 990.0    | 620.7            | 1308             |
| LNDFH-I | TERM      | 2                        | 26 | 5.000 | 2264  | 987.3 | 704.9 | 1043     | 207.8            | 1484             |
| LNDFH-I | TERM      | 3                        | 28 | 5.000 | 2313  | 1025  | 700.3 | 1088     | 525.8            | 1495             |
| LNDFH-I | TERM      | 4                        | 28 | 5.000 | 1937  | 913.0 | 619.2 | 1068     | 410.4            | 1309             |
| LNDFH-I | TERM      | 5                        | 28 | 5.000 | 1838  | 841.2 | 595.7 | 949.4    | 351.1            | 1255             |
| LNDFH-I | TERM      | 6                        | 27 | 5.000 | 2024  | 826.1 | 616.9 | 958.9    | 231.9            | 1214             |
| LNDFH-I | TERM      | 7                        | 27 | 5.000 | 2167  | 792.5 | 602.2 | 824.2    | 194.8            | 1249             |
| LNDFH-I | TERM      | 8                        | 28 | 5.000 | 1935  | 669.2 | 548.9 | 748.8    | 5.000            | 964.3            |
| LNFP-I  | PRE-TERM  | 1                        | 25 | 13.50 | 2806  | 1337  | 914.6 | 1424     | 773.5            | 2005             |
| LNFP-I  | PRE-TERM  | 2                        | 25 | 13.50 | 2195  | 981.6 | 662.0 | 1027     | 654.5            | 1448             |
| LNFP-I  | PRE-TERM  | 3                        | 25 | 13.50 | 2178  | 875.5 | 606.6 | 876.2    | 600.4            | 1307             |
| LNFP-I  | PRE-TERM  | 4                        | 24 | 13.50 | 2062  | 762.1 | 546.9 | 878.9    | 439.5            | 1007             |
| LNFP-I  | PRE-TERM  | 5                        | 25 | 13.50 | 1624  | 703.9 | 503.7 | 673.9    | 422.9            | 1093             |
| LNFP-I  | PRE-TERM  | 6                        | 24 | 13.50 | 1840  | 625.2 | 486.8 | 657.3    | 229.8            | 934.6            |
| LNFP-I  | PRE-TERM  | 7                        | 24 | 13.50 | 1773  | 568.1 | 441.9 | 576.6    | 265.2            | 843.4            |
| LNFP-I  | PRE-TERM  | 8                        | 24 | 13.50 | 1123  | 529.3 | 366.9 | 541.0    | 295.2            | 800.4            |
| LNFP-I  | PRE-TERM  | 10                       | 23 | 13.50 | 1436  | 465.7 | 340.5 | 443.9    | 316.2            | 656.9            |
| LNFP-I  | PRE-TERM  | 12                       | 21 | 13.50 | 966.6 | 358.4 | 307.6 | 356.3    | 13.50            | 513.5            |
| LNFP-I  | PRE-TERM  | 14                       | 21 | 13.50 | 1014  | 362.4 | 314.4 | 327.9    | 13.50            | 549.4            |
| LNFP-I  | PRE-TERM  | 16                       | 19 | 13.50 | 933.6 | 334.1 | 283.6 | 273.0    | 145.5            | 540.5            |



**Table S1 Concentration of Human Milk Oligosaccharides in Term or Preterm Milk At Different Weeks Postpartum**

\* When there are results below the method limit of quantification (LoQ) the result has been assigned value of  $0.5 \times \text{LoQ}$ , hence the minimum value appears to be the same in many cases. When a large number of datapoints are below LoQ this can also have the effect that the median = minimum.

| HMO      | Study Arm | HMO Concentration (mg/L) |    |       |       |       |       |          |                  |                  |
|----------|-----------|--------------------------|----|-------|-------|-------|-------|----------|------------------|------------------|
|          |           | Week Post Partum         | N  | min * | max   | mean  | sd    | median * | Quartile 1 (25%) | Quartile 3 (75%) |
| LNFP-I   | TERM      | 1                        | 28 | 13.50 | 3597  | 1743  | 1125  | 2061     | 901.6            | 2431             |
| LNFP-I   | TERM      | 2                        | 26 | 13.50 | 3073  | 1317  | 922.2 | 1454     | 635.8            | 1761             |
| LNFP-I   | TERM      | 3                        | 28 | 13.50 | 3018  | 1214  | 854.0 | 1214     | 565.8            | 1803             |
| LNFP-I   | TERM      | 4                        | 28 | 13.50 | 3156  | 1061  | 817.3 | 994.6    | 426.1            | 1665             |
| LNFP-I   | TERM      | 5                        | 28 | 13.50 | 2655  | 821.6 | 648.2 | 879.1    | 307.0            | 1125             |
| LNFP-I   | TERM      | 6                        | 27 | 13.50 | 2045  | 680.9 | 513.9 | 735.2    | 244.7            | 891.8            |
| LNFP-I   | TERM      | 7                        | 27 | 13.50 | 2617  | 642.1 | 584.9 | 646.1    | 192.7            | 796.0            |
| LNFP-I   | TERM      | 8                        | 28 | 13.50 | 1956  | 561.7 | 497.9 | 481.2    | 192.2            | 774.6            |
| LNFP-II  | PRE-TERM  | 1                        | 25 | 17.50 | 2094  | 542.4 | 594.0 | 226.1    | 146.0            | 576.0            |
| LNFP-II  | PRE-TERM  | 2                        | 25 | 17.50 | 1950  | 616.0 | 591.1 | 326.3    | 191.5            | 828.9            |
| LNFP-II  | PRE-TERM  | 3                        | 25 | 17.50 | 1922  | 625.8 | 559.0 | 372.4    | 258.2            | 812.2            |
| LNFP-II  | PRE-TERM  | 4                        | 24 | 17.50 | 2220  | 620.0 | 561.9 | 401.7    | 245.9            | 819.9            |
| LNFP-II  | PRE-TERM  | 5                        | 25 | 17.50 | 1775  | 586.0 | 477.3 | 469.5    | 230.0            | 761.0            |
| LNFP-II  | PRE-TERM  | 6                        | 24 | 17.50 | 2138  | 602.6 | 589.7 | 393.9    | 190.9            | 805.7            |
| LNFP-II  | PRE-TERM  | 7                        | 24 | 17.50 | 2116  | 618.3 | 540.9 | 513.2    | 207.1            | 796.6            |
| LNFP-II  | PRE-TERM  | 8                        | 24 | 17.50 | 1804  | 562.8 | 445.8 | 464.1    | 219.5            | 770.7            |
| LNFP-II  | PRE-TERM  | 10                       | 23 | 17.50 | 1432  | 474.9 | 350.3 | 385.2    | 216.0            | 659.2            |
| LNFP-II  | PRE-TERM  | 12                       | 21 | 17.50 | 2373  | 564.2 | 525.0 | 510.0    | 249.7            | 633.7            |
| LNFP-II  | PRE-TERM  | 14                       | 21 | 17.50 | 1476  | 502.6 | 371.7 | 427.7    | 281.3            | 601.3            |
| LNFP-II  | PRE-TERM  | 16                       | 19 | 17.50 | 2593  | 516.3 | 583.7 | 378.9    | 218.0            | 522.9            |
| LNFP-II  | TERM      | 1                        | 28 | 17.50 | 1616  | 415.3 | 472.5 | 229.4    | 121.7            | 345.1            |
| LNFP-II  | TERM      | 2                        | 26 | 17.50 | 1884  | 523.0 | 508.7 | 326.9    | 210.0            | 622.0            |
| LNFP-II  | TERM      | 3                        | 28 | 17.50 | 1672  | 507.3 | 473.6 | 343.1    | 214.6            | 653.9            |
| LNFP-II  | TERM      | 4                        | 28 | 17.50 | 1565  | 531.3 | 461.9 | 336.3    | 243.4            | 673.9            |
| LNFP-II  | TERM      | 5                        | 28 | 17.50 | 1411  | 456.2 | 385.9 | 349.5    | 183.8            | 530.3            |
| LNFP-II  | TERM      | 6                        | 27 | 17.50 | 1476  | 438.3 | 360.8 | 357.0    | 199.0            | 510.1            |
| LNFP-II  | TERM      | 7                        | 27 | 17.50 | 1171  | 422.7 | 312.8 | 316.3    | 199.8            | 560.0            |
| LNFP-II  | TERM      | 8                        | 28 | 17.50 | 1272  | 402.5 | 338.4 | 309.9    | 171.8            | 564.5            |
| LNFP-III | PRE-TERM  | 1                        | 25 | 55.72 | 713.1 | 346.2 | 160.2 | 347.4    | 236.0            | 404.4            |

**Table S1 Concentration of Human Milk Oligosaccharides in Term or Preterm Milk At Different Weeks Postpartum**

*\* When there are results below the method limit of quantification (LoQ) the result has been assigned value of  $0.5 \times \text{LoQ}$ , hence the minimum value appears to be the same in many cases. When a large number of datapoints are below LoQ this can also have the effect that the median = minimum.*

| HMO      | Study Arm | HMO Concentration (mg/L) |    |       |       |       |       |          |                  |                  |
|----------|-----------|--------------------------|----|-------|-------|-------|-------|----------|------------------|------------------|
|          |           | Week Post Partum         | N  | min * | max   | mean  | sd    | median * | Quartile 1 (25%) | Quartile 3 (75%) |
| LNFP-III | PRE-TERM  | 2                        | 25 | 35.70 | 779.2 | 317.1 | 174.4 | 297.5    | 188.2            | 364.3            |
| LNFP-III | PRE-TERM  | 3                        | 25 | 40.94 | 733.6 | 307.8 | 160.6 | 279.9    | 211.2            | 397.0            |
| LNFP-III | PRE-TERM  | 4                        | 24 | 49.93 | 727.3 | 302.9 | 143.9 | 294.9    | 234.5            | 360.3            |
| LNFP-III | PRE-TERM  | 5                        | 25 | 52.14 | 742.0 | 321.0 | 145.9 | 316.3    | 232.4            | 402.6            |
| LNFP-III | PRE-TERM  | 6                        | 24 | 49.25 | 543.6 | 328.0 | 137.8 | 344.8    | 218.2            | 433.7            |
| LNFP-III | PRE-TERM  | 7                        | 24 | 17.50 | 711.8 | 336.7 | 159.4 | 331.3    | 241.4            | 397.1            |
| LNFP-III | PRE-TERM  | 8                        | 24 | 52.97 | 847.4 | 357.1 | 179.4 | 308.5    | 249.6            | 416.0            |
| LNFP-III | PRE-TERM  | 10                       | 23 | 60.20 | 707.5 | 350.2 | 147.2 | 329.7    | 271.7            | 427.3            |
| LNFP-III | PRE-TERM  | 12                       | 21 | 50.94 | 653.0 | 389.0 | 163.8 | 385.3    | 259.4            | 472.4            |
| LNFP-III | PRE-TERM  | 14                       | 21 | 74.13 | 750.3 | 368.5 | 166.3 | 352.7    | 233.2            | 498.0            |
| LNFP-III | PRE-TERM  | 16                       | 19 | 89.27 | 774.0 | 343.3 | 166.9 | 338.5    | 231.1            | 395.1            |
| LNFP-III | TERM      | 1                        | 28 | 76.48 | 1268  | 420.6 | 227.8 | 382.0    | 314.1            | 475.1            |
| LNFP-III | TERM      | 2                        | 26 | 163.3 | 1169  | 370.8 | 194.3 | 320.7    | 266.9            | 432.4            |
| LNFP-III | TERM      | 3                        | 28 | 153.7 | 911.0 | 305.1 | 142.8 | 286.4    | 224.1            | 337.9            |
| LNFP-III | TERM      | 4                        | 28 | 153.3 | 823.9 | 296.8 | 139.4 | 256.1    | 215.7            | 348.6            |
| LNFP-III | TERM      | 5                        | 28 | 165.5 | 714.0 | 301.5 | 119.7 | 270.4    | 227.6            | 346.7            |
| LNFP-III | TERM      | 6                        | 27 | 17.50 | 786.1 | 322.5 | 151.1 | 308.5    | 212.8            | 395.0            |
| LNFP-III | TERM      | 7                        | 27 | 190.9 | 722.3 | 331.6 | 136.1 | 299.0    | 238.4            | 362.7            |
| LNFP-III | TERM      | 8                        | 28 | 108.0 | 569.7 | 318.6 | 109.8 | 300.5    | 253.3            | 377.2            |
| LNFP-V   | PRE-TERM  | 1                        | 25 | 12.00 | 320.9 | 75.84 | 97.85 | 30.53    | 12.00            | 58.18            |
| LNFP-V   | PRE-TERM  | 2                        | 25 | 12.00 | 317.8 | 85.10 | 99.20 | 43.27    | 12.00            | 92.28            |
| LNFP-V   | PRE-TERM  | 3                        | 25 | 12.00 | 309.0 | 90.49 | 95.38 | 48.72    | 26.19            | 95.79            |
| LNFP-V   | PRE-TERM  | 4                        | 24 | 12.00 | 363.8 | 90.01 | 98.88 | 52.31    | 25.15            | 107.9            |
| LNFP-V   | PRE-TERM  | 5                        | 25 | 12.00 | 301.0 | 84.27 | 81.58 | 64.56    | 25.18            | 94.75            |
| LNFP-V   | PRE-TERM  | 6                        | 24 | 12.00 | 359.5 | 92.44 | 99.90 | 57.93    | 24.20            | 112.5            |
| LNFP-V   | PRE-TERM  | 7                        | 24 | 12.00 | 321.2 | 88.74 | 88.39 | 64.66    | 21.81            | 105.4            |
| LNFP-V   | PRE-TERM  | 8                        | 24 | 12.00 | 260.0 | 79.40 | 69.93 | 60.23    | 27.32            | 108.3            |
| LNFP-V   | PRE-TERM  | 10                       | 23 | 12.00 | 182.5 | 61.18 | 52.12 | 44.56    | 12.00            | 85.80            |
| LNFP-V   | PRE-TERM  | 12                       | 21 | 12.00 | 328.8 | 72.40 | 73.90 | 60.76    | 26.89            | 80.43            |

**Table S1 Concentration of Human Milk Oligosaccharides in Term or Preterm Milk At Different Weeks Postpartum**

*\* When there are results below the method limit of quantification (LoQ) the result has been assigned value of  $0.5 \times \text{LoQ}$ , hence the minimum value appears to be the same in many cases. When a large number of datapoints are below LoQ this can also have the effect that the median = minimum.*

| HMO    | Study Arm | HMO Concentration (mg/L) |    |       |       |       |       |          |                  |                  |
|--------|-----------|--------------------------|----|-------|-------|-------|-------|----------|------------------|------------------|
|        |           | Week Post Partum         | N  | min * | max   | mean  | sd    | median * | Quartile 1 (25%) | Quartile 3 (75%) |
| LNFP-V | PRE-TERM  | 14                       | 21 | 12.00 | 202.6 | 67.25 | 54.22 | 53.26    | 28.01            | 85.62            |
| LNFP-V | PRE-TERM  | 16                       | 19 | 12.00 | 408.7 | 68.82 | 92.08 | 40.12    | 27.85            | 62.47            |
| LNFP-V | TERM      | 1                        | 28 | 12.00 | 203.7 | 58.55 | 64.01 | 28.29    | 12.00            | 68.00            |
| LNFP-V | TERM      | 2                        | 26 | 12.00 | 268.1 | 75.17 | 75.12 | 48.35    | 25.88            | 72.19            |
| LNFP-V | TERM      | 3                        | 28 | 12.00 | 349.1 | 81.09 | 83.30 | 55.34    | 31.19            | 88.38            |
| LNFP-V | TERM      | 4                        | 28 | 12.00 | 202.6 | 67.55 | 60.03 | 43.41    | 27.20            | 72.89            |
| LNFP-V | TERM      | 5                        | 28 | 12.00 | 228.2 | 64.93 | 56.04 | 52.87    | 26.25            | 77.17            |
| LNFP-V | TERM      | 6                        | 27 | 12.00 | 226.4 | 63.81 | 52.32 | 49.38    | 29.57            | 82.53            |
| LNFP-V | TERM      | 7                        | 27 | 12.00 | 162.9 | 57.73 | 41.46 | 56.51    | 28.73            | 83.85            |
| LNFP-V | TERM      | 8                        | 28 | 12.00 | 196.7 | 53.36 | 47.74 | 40.27    | 12.00            | 77.09            |
| LNnDFH | PRE-TERM  | 1                        | 25 | 14.00 | 543.1 | 76.02 | 129.9 | 29.06    | 14.00            | 65.59            |
| LNnDFH | PRE-TERM  | 2                        | 25 | 14.00 | 299.7 | 43.36 | 65.62 | 14.00    | 14.00            | 37.78            |
| LNnDFH | PRE-TERM  | 3                        | 25 | 14.00 | 333.0 | 42.54 | 71.15 | 14.00    | 14.00            | 40.63            |
| LNnDFH | PRE-TERM  | 4                        | 24 | 14.00 | 195.3 | 33.73 | 43.93 | 14.00    | 14.00            | 21.17            |
| LNnDFH | PRE-TERM  | 5                        | 25 | 14.00 | 186.3 | 50.19 | 56.12 | 14.00    | 14.00            | 67.69            |
| LNnDFH | PRE-TERM  | 6                        | 24 | 14.00 | 167.1 | 37.55 | 39.51 | 14.00    | 14.00            | 39.95            |
| LNnDFH | PRE-TERM  | 7                        | 24 | 14.00 | 184.6 | 28.69 | 36.84 | 14.00    | 14.00            | 19.35            |
| LNnDFH | PRE-TERM  | 8                        | 24 | 14.00 | 156.3 | 34.93 | 38.53 | 14.00    | 14.00            | 30.21            |
| LNnDFH | PRE-TERM  | 10                       | 23 | 14.00 | 119.8 | 33.37 | 28.06 | 29.34    | 14.00            | 35.68            |
| LNnDFH | PRE-TERM  | 12                       | 21 | 14.00 | 115.8 | 39.61 | 31.74 | 14.00    | 14.00            | 67.08            |
| LNnDFH | PRE-TERM  | 14                       | 21 | 14.00 | 733.1 | 67.62 | 155.3 | 14.00    | 14.00            | 54.35            |
| LNnDFH | PRE-TERM  | 16                       | 19 | 14.00 | 109.1 | 40.20 | 32.35 | 30.74    | 14.00            | 51.30            |
| LNnDFH | TERM      | 1                        | 28 | 14.00 | 181.8 | 51.69 | 47.26 | 33.17    | 14.00            | 71.98            |
| LNnDFH | TERM      | 2                        | 26 | 14.00 | 107.6 | 31.69 | 25.56 | 14.00    | 14.00            | 45.90            |
| LNnDFH | TERM      | 3                        | 28 | 14.00 | 77.46 | 23.79 | 15.98 | 14.00    | 14.00            | 31.02            |
| LNnDFH | TERM      | 4                        | 28 | 14.00 | 42.02 | 19.38 | 9.758 | 14.00    | 14.00            | 17.79            |
| LNnDFH | TERM      | 5                        | 28 | 14.00 | 132.3 | 23.26 | 23.73 | 14.00    | 14.00            | 17.69            |
| LNnDFH | TERM      | 6                        | 27 | 14.00 | 98.17 | 31.78 | 27.37 | 14.00    | 14.00            | 44.89            |
| LNnDFH | TERM      | 7                        | 27 | 14.00 | 94.89 | 26.79 | 22.32 | 14.00    | 14.00            | 30.46            |

**Table S1 Concentration of Human Milk Oligosaccharides in Term or Preterm Milk At Different Weeks Postpartum**

*\* When there are results below the method limit of quantification (LoQ) the result has been assigned value of  $0.5 \times \text{LoQ}$ , hence the minimum value appears to be the same in many cases. When a large number of datapoints are below LoQ this can also have the effect that the median = minimum.*

| HMO    | Study Arm | HMO Concentration (mg/L) |    |       |       |       |       |          |                  |                  |
|--------|-----------|--------------------------|----|-------|-------|-------|-------|----------|------------------|------------------|
|        |           | Week Post Partum         | N  | min * | max   | mean  | sd    | median * | Quartile 1 (25%) | Quartile 3 (75%) |
| LNnDFH | TERM      | 8                        | 28 | 14.00 | 94.07 | 25.98 | 23.65 | 14.00    | 14.00            | 30.37            |
| LNnFP  | PRE-TERM  | 1                        | 25 | 9.500 | 89.76 | 18.66 | 17.60 | 9.500    | 9.500            | 25.09            |
| LNnFP  | PRE-TERM  | 2                        | 25 | 9.500 | 50.62 | 15.70 | 10.02 | 9.500    | 9.500            | 21.61            |
| LNnFP  | PRE-TERM  | 3                        | 25 | 9.500 | 50.34 | 14.95 | 10.76 | 9.500    | 9.500            | 19.18            |
| LNnFP  | PRE-TERM  | 4                        | 24 | 9.500 | 59.82 | 15.23 | 13.45 | 9.500    | 9.500            | 9.500            |
| LNnFP  | PRE-TERM  | 5                        | 25 | 9.500 | 61.67 | 15.23 | 12.87 | 9.500    | 9.500            | 9.500            |
| LNnFP  | PRE-TERM  | 6                        | 24 | 9.500 | 60.47 | 14.67 | 11.70 | 9.500    | 9.500            | 12.13            |
| LNnFP  | PRE-TERM  | 7                        | 24 | 9.500 | 55.24 | 14.16 | 10.88 | 9.500    | 9.500            | 9.500            |
| LNnFP  | PRE-TERM  | 8                        | 24 | 9.500 | 57.65 | 15.24 | 13.45 | 9.500    | 9.500            | 11.88            |
| LNnFP  | PRE-TERM  | 10                       | 23 | 9.500 | 60.19 | 15.78 | 13.58 | 9.500    | 9.500            | 9.500            |
| LNnFP  | PRE-TERM  | 12                       | 21 | 9.500 | 53.23 | 14.96 | 12.16 | 9.500    | 9.500            | 9.500            |
| LNnFP  | PRE-TERM  | 14                       | 21 | 9.500 | 70.04 | 15.47 | 15.66 | 9.500    | 9.500            | 9.500            |
| LNnFP  | PRE-TERM  | 16                       | 19 | 9.500 | 88.05 | 16.84 | 20.45 | 9.500    | 9.500            | 9.500            |
| LNnFP  | TERM      | 1                        | 28 | 9.500 | 56.56 | 17.07 | 14.28 | 9.500    | 9.500            | 20.33            |
| LNnFP  | TERM      | 2                        | 26 | 9.500 | 38.38 | 14.49 | 9.620 | 9.500    | 9.500            | 9.500            |
| LNnFP  | TERM      | 3                        | 28 | 9.500 | 49.35 | 13.55 | 8.781 | 9.500    | 9.500            | 11.97            |
| LNnFP  | TERM      | 4                        | 28 | 9.500 | 66.17 | 14.45 | 12.37 | 9.500    | 9.500            | 9.500            |
| LNnFP  | TERM      | 5                        | 28 | 9.500 | 52.21 | 13.47 | 9.429 | 9.500    | 9.500            | 9.500            |
| LNnFP  | TERM      | 6                        | 27 | 9.500 | 56.13 | 14.81 | 10.03 | 9.500    | 9.500            | 19.40            |
| LNnFP  | TERM      | 7                        | 27 | 9.500 | 37.85 | 13.88 | 7.109 | 9.500    | 9.500            | 19.21            |
| LNnFP  | TERM      | 8                        | 28 | 9.500 | 28.50 | 13.31 | 6.325 | 9.500    | 9.500            | 20.40            |
| LNnT   | PRE-TERM  | 1                        | 25 | 90.25 | 546.3 | 274.1 | 122.2 | 250.6    | 186.6            | 381.7            |
| LNnT   | PRE-TERM  | 2                        | 25 | 96.36 | 380.7 | 222.6 | 89.83 | 222.0    | 147.3            | 292.5            |
| LNnT   | PRE-TERM  | 3                        | 25 | 66.51 | 353.8 | 189.8 | 77.97 | 192.5    | 127.6            | 232.0            |
| LNnT   | PRE-TERM  | 4                        | 24 | 63.43 | 349.0 | 178.4 | 84.85 | 179.7    | 105.5            | 233.0            |
| LNnT   | PRE-TERM  | 5                        | 25 | 43.09 | 383.2 | 158.4 | 91.21 | 140.5    | 88.14            | 225.3            |
| LNnT   | PRE-TERM  | 6                        | 24 | 12.00 | 397.8 | 168.9 | 99.48 | 152.7    | 91.30            | 232.2            |
| LNnT   | PRE-TERM  | 7                        | 24 | 35.89 | 314.7 | 163.0 | 84.18 | 166.7    | 90.65            | 214.9            |
| LNnT   | PRE-TERM  | 8                        | 24 | 33.45 | 440.8 | 159.0 | 92.27 | 161.2    | 92.85            | 202.4            |

**Table S1 Concentration of Human Milk Oligosaccharides in Term or Preterm Milk At Different Weeks Postpartum**

\* When there are results below the method limit of quantification (LoQ) the result has been assigned value of  $0.5 \times \text{LoQ}$ , hence the minimum value appears to be the same in many cases. When a large number of datapoints are below LoQ this can also have the effect that the median = minimum.

| HMO  | Study Arm | HMO Concentration (mg/L) |    |       |       |       |       |          |                  |                  |
|------|-----------|--------------------------|----|-------|-------|-------|-------|----------|------------------|------------------|
|      |           | Week Post Partum         | N  | min * | max   | mean  | sd    | median * | Quartile 1 (25%) | Quartile 3 (75%) |
| LNnT | PRE-TERM  | 10                       | 23 | 24.44 | 464.0 | 154.7 | 106.3 | 128.3    | 78.35            | 202.8            |
| LNnT | PRE-TERM  | 12                       | 21 | 12.00 | 379.4 | 122.4 | 86.34 | 104.6    | 66.88            | 162.7            |
| LNnT | PRE-TERM  | 14                       | 21 | 12.00 | 444.3 | 125.3 | 100.1 | 86.79    | 68.35            | 149.4            |
| LNnT | PRE-TERM  | 16                       | 19 | 25.55 | 437.3 | 126.2 | 103.5 | 90.89    | 54.01            | 166.0            |
| LNnT | TERM      | 1                        | 28 | 187.1 | 565.3 | 333.4 | 94.38 | 341.0    | 257.0            | 399.8            |
| LNnT | TERM      | 2                        | 26 | 113.9 | 475.4 | 227.4 | 95.75 | 227.1    | 149.5            | 264.0            |
| LNnT | TERM      | 3                        | 28 | 67.58 | 385.9 | 182.3 | 81.57 | 171.6    | 114.7            | 222.7            |
| LNnT | TERM      | 4                        | 28 | 52.63 | 350.3 | 165.8 | 76.29 | 150.4    | 115.4            | 196.6            |
| LNnT | TERM      | 5                        | 28 | 12.00 | 369.5 | 152.7 | 84.04 | 138.1    | 101.7            | 186.4            |
| LNnT | TERM      | 6                        | 27 | 12.00 | 311.2 | 144.4 | 74.93 | 136.2    | 84.46            | 187.7            |
| LNnT | TERM      | 7                        | 27 | 33.31 | 270.0 | 138.1 | 65.19 | 137.7    | 81.85            | 173.3            |
| LNnT | TERM      | 8                        | 28 | 27.23 | 284.9 | 132.8 | 65.28 | 121.3    | 85.20            | 164.4            |
| LNT  | PRE-TERM  | 1                        | 25 | 298.8 | 3029  | 1179  | 673.8 | 912.8    | 803.4            | 1684             |
| LNT  | PRE-TERM  | 2                        | 25 | 644.9 | 3296  | 1522  | 725.9 | 1186     | 965.1            | 1821             |
| LNT  | PRE-TERM  | 3                        | 25 | 510.5 | 2903  | 1448  | 627.8 | 1245     | 997.4            | 1715             |
| LNT  | PRE-TERM  | 4                        | 24 | 469.1 | 2737  | 1319  | 633.2 | 1156     | 892.1            | 1862             |
| LNT  | PRE-TERM  | 5                        | 25 | 356.6 | 2468  | 1162  | 541.6 | 1119     | 712.6            | 1506             |
| LNT  | PRE-TERM  | 6                        | 24 | 144.1 | 2428  | 1158  | 655.4 | 1049     | 583.8            | 1649             |
| LNT  | PRE-TERM  | 7                        | 24 | 312.8 | 2376  | 1120  | 592.7 | 1078     | 592.9            | 1499             |
| LNT  | PRE-TERM  | 8                        | 24 | 294.8 | 2184  | 995.9 | 503.2 | 961.9    | 601.9            | 1268             |
| LNT  | PRE-TERM  | 10                       | 23 | 223.6 | 1829  | 796.7 | 392.3 | 704.7    | 528.9            | 1015             |
| LNT  | PRE-TERM  | 12                       | 21 | 175.3 | 1554  | 754.7 | 362.0 | 763.9    | 588.8            | 1013             |
| LNT  | PRE-TERM  | 14                       | 21 | 232.8 | 1191  | 669.1 | 289.9 | 675.4    | 447.8            | 827.3            |
| LNT  | PRE-TERM  | 16                       | 19 | 145.2 | 2113  | 660.3 | 438.9 | 604.4    | 391.5            | 824.2            |
| LNT  | TERM      | 1                        | 28 | 199.8 | 3400  | 993.4 | 742.0 | 737.9    | 570.5            | 1164             |
| LNT  | TERM      | 2                        | 26 | 358.7 | 3848  | 1334  | 660.5 | 1214     | 970.3            | 1474             |
| LNT  | TERM      | 3                        | 28 | 447.8 | 3092  | 1286  | 576.3 | 1272     | 891.8            | 1536             |
| LNT  | TERM      | 4                        | 28 | 384.6 | 3087  | 1216  | 584.5 | 1207     | 768.9            | 1370             |
| LNT  | TERM      | 5                        | 28 | 307.2 | 2480  | 1056  | 586.1 | 937.8    | 639.4            | 1269             |

**Table S1 Concentration of Human Milk Oligosaccharides in Term or Preterm Milk At Different Weeks Postpartum**

*\* When there are results below the method limit of quantification (LoQ) the result has been assigned value of  $0.5 \times \text{LoQ}$ , hence the minimum value appears to be the same in many cases. When a large number of datapoints are below LoQ this can also have the effect that the median = minimum.*

| HMO  | Study Arm | HMO Concentration (mg/L) |    |       |       |       |       |          |                  |                  |
|------|-----------|--------------------------|----|-------|-------|-------|-------|----------|------------------|------------------|
|      |           | Week Post Partum         | N  | min * | max   | mean  | sd    | median * | Quartile 1 (25%) | Quartile 3 (75%) |
| LNT  | TERM      | 6                        | 27 | 280.7 | 2109  | 938.5 | 513.8 | 843.1    | 561.9            | 1270             |
| LNT  | TERM      | 7                        | 27 | 217.7 | 2251  | 877.3 | 460.2 | 813.3    | 529.7            | 1152             |
| LNT  | TERM      | 8                        | 28 | 213.7 | 1852  | 803.9 | 468.0 | 753.0    | 431.3            | 1029             |
| LSTb | PRE-TERM  | 1                        | 25 | 44.25 | 219.5 | 100.4 | 47.32 | 88.16    | 63.18            | 125.0            |
| LSTb | PRE-TERM  | 2                        | 25 | 41.49 | 211.3 | 110.9 | 44.94 | 100.1    | 79.15            | 151.4            |
| LSTb | PRE-TERM  | 3                        | 25 | 45.44 | 217.4 | 117.8 | 47.69 | 110.5    | 84.13            | 151.3            |
| LSTb | PRE-TERM  | 4                        | 24 | 47.34 | 256.1 | 112.6 | 50.84 | 107.4    | 74.61            | 136.3            |
| LSTb | PRE-TERM  | 5                        | 25 | 42.09 | 334.7 | 115.8 | 63.93 | 106.0    | 86.22            | 134.2            |
| LSTb | PRE-TERM  | 6                        | 24 | 37.86 | 314.7 | 110.7 | 58.66 | 118.1    | 64.81            | 135.3            |
| LSTb | PRE-TERM  | 7                        | 24 | 36.96 | 423.9 | 107.2 | 76.22 | 96.84    | 61.79            | 125.7            |
| LSTb | PRE-TERM  | 8                        | 24 | 7.000 | 400.7 | 102.0 | 76.47 | 87.16    | 54.05            | 123.8            |
| LSTb | PRE-TERM  | 10                       | 23 | 34.87 | 195.0 | 85.69 | 41.71 | 77.14    | 50.40            | 111.9            |
| LSTb | PRE-TERM  | 12                       | 21 | 31.54 | 405.6 | 94.92 | 80.22 | 80.04    | 49.06            | 104.5            |
| LSTb | PRE-TERM  | 14                       | 21 | 25.18 | 243.3 | 83.89 | 43.96 | 78.78    | 62.11            | 94.78            |
| LSTb | PRE-TERM  | 16                       | 19 | 23.33 | 247.3 | 78.39 | 46.98 | 75.40    | 52.56            | 91.57            |
| LSTb | TERM      | 1                        | 28 | 15.52 | 196.6 | 81.57 | 41.01 | 71.90    | 50.83            | 98.18            |
| LSTb | TERM      | 2                        | 26 | 28.89 | 160.5 | 75.69 | 31.50 | 67.04    | 52.67            | 92.92            |
| LSTb | TERM      | 3                        | 28 | 36.75 | 163.7 | 82.69 | 31.37 | 81.26    | 55.62            | 109.3            |
| LSTb | TERM      | 4                        | 28 | 20.15 | 136.8 | 80.44 | 31.01 | 79.26    | 57.63            | 106.6            |
| LSTb | TERM      | 5                        | 28 | 21.68 | 166.6 | 76.87 | 33.05 | 70.04    | 53.87            | 96.73            |
| LSTb | TERM      | 6                        | 27 | 7.000 | 147.4 | 73.95 | 39.28 | 73.21    | 45.75            | 98.08            |
| LSTb | TERM      | 7                        | 27 | 17.27 | 177.0 | 76.51 | 38.73 | 71.49    | 45.40            | 102.9            |
| LSTb | TERM      | 8                        | 28 | 7.000 | 152.6 | 66.24 | 35.92 | 60.43    | 44.76            | 93.16            |
| LSTc | PRE-TERM  | 1                        | 25 | 95.01 | 1019  | 432.6 | 254.8 | 439.1    | 184.0            | 605.1            |
| LSTc | PRE-TERM  | 2                        | 25 | 37.98 | 629.5 | 274.7 | 153.5 | 248.2    | 176.2            | 378.9            |
| LSTc | PRE-TERM  | 3                        | 25 | 31.79 | 534.2 | 208.0 | 125.3 | 183.5    | 121.2            | 274.7            |
| LSTc | PRE-TERM  | 4                        | 24 | 28.75 | 622.9 | 178.3 | 133.6 | 123.7    | 96.69            | 230.8            |
| LSTc | PRE-TERM  | 5                        | 25 | 24.49 | 305.6 | 128.1 | 75.25 | 119.0    | 64.51            | 162.3            |
| LSTc | PRE-TERM  | 6                        | 24 | 20.21 | 345.5 | 126.1 | 80.54 | 106.3    | 71.02            | 182.7            |

**Table S1 Concentration of Human Milk Oligosaccharides in Term or Preterm Milk At Different Weeks Postpartum**

*\* When there are results below the method limit of quantification (LoQ) the result has been assigned value of  $0.5 \times \text{LoQ}$ , hence the minimum value appears to be the same in many cases. When a large number of datapoints are below LoQ this can also have the effect that the median = minimum.*

| HMO       | Study Arm | HMO Concentration (mg/L) |    |       |       |       |       |          |                  |                  |
|-----------|-----------|--------------------------|----|-------|-------|-------|-------|----------|------------------|------------------|
|           |           | Week Post Partum         | N  | min * | max   | mean  | sd    | median * | Quartile 1 (25%) | Quartile 3 (75%) |
| LSTc      | PRE-TERM  | 7                        | 24 | 17.24 | 371.1 | 105.7 | 76.80 | 84.04    | 56.32            | 154.0            |
| LSTc      | PRE-TERM  | 8                        | 24 | 17.82 | 355.6 | 95.58 | 72.49 | 77.71    | 54.36            | 121.6            |
| LSTc      | PRE-TERM  | 10                       | 23 | 24.55 | 209.1 | 75.71 | 45.34 | 62.11    | 46.86            | 87.28            |
| LSTc      | PRE-TERM  | 12                       | 21 | 20.28 | 125.3 | 54.96 | 27.90 | 48.35    | 34.47            | 79.20            |
| LSTc      | PRE-TERM  | 14                       | 21 | 10.91 | 102.5 | 40.31 | 26.27 | 32.26    | 24.47            | 53.72            |
| LSTc      | PRE-TERM  | 16                       | 19 | 9.258 | 96.78 | 36.68 | 26.72 | 22.43    | 17.96            | 55.87            |
| LSTc      | TERM      | 1                        | 28 | 36.80 | 1199  | 578.2 | 266.1 | 526.1    | 390.4            | 748.1            |
| LSTc      | TERM      | 2                        | 26 | 204.1 | 1169  | 481.0 | 267.3 | 395.1    | 321.7            | 499.1            |
| LSTc      | TERM      | 3                        | 28 | 103.3 | 755.6 | 306.0 | 162.3 | 233.6    | 191.5            | 392.1            |
| LSTc      | TERM      | 4                        | 28 | 64.34 | 524.8 | 215.6 | 109.2 | 199.2    | 131.6            | 297.1            |
| LSTc      | TERM      | 5                        | 28 | 32.73 | 367.7 | 157.6 | 76.72 | 141.3    | 97.24            | 196.6            |
| LSTc      | TERM      | 6                        | 27 | 30.19 | 267.6 | 132.0 | 59.12 | 125.0    | 92.28            | 173.9            |
| LSTc      | TERM      | 7                        | 27 | 20.07 | 271.5 | 107.6 | 64.41 | 96.05    | 65.56            | 127.3            |
| LSTc      | TERM      | 8                        | 28 | 16.92 | 254.8 | 89.79 | 57.66 | 66.11    | 53.06            | 117.7            |
| MFLNH-III | PRE-TERM  | 1                        | 25 | 70.38 | 548.6 | 254.5 | 131.4 | 221.4    | 166.0            | 325.6            |
| MFLNH-III | PRE-TERM  | 2                        | 25 | 58.75 | 714.1 | 373.4 | 161.5 | 346.8    | 278.5            | 488.6            |
| MFLNH-III | PRE-TERM  | 3                        | 25 | 64.26 | 790.5 | 379.0 | 180.0 | 355.5    | 271.3            | 461.7            |
| MFLNH-III | PRE-TERM  | 4                        | 24 | 65.81 | 743.2 | 356.1 | 173.2 | 338.3    | 240.4            | 454.5            |
| MFLNH-III | PRE-TERM  | 5                        | 25 | 57.17 | 820.2 | 289.6 | 159.9 | 257.9    | 201.3            | 385.5            |
| MFLNH-III | PRE-TERM  | 6                        | 24 | 87.89 | 856.2 | 286.8 | 169.6 | 248.7    | 189.0            | 351.5            |
| MFLNH-III | PRE-TERM  | 7                        | 24 | 77.34 | 745.1 | 268.8 | 155.3 | 248.1    | 159.8            | 347.5            |
| MFLNH-III | PRE-TERM  | 8                        | 24 | 64.97 | 753.0 | 245.6 | 153.2 | 260.1    | 146.3            | 300.6            |
| MFLNH-III | PRE-TERM  | 10                       | 23 | 53.68 | 707.1 | 188.3 | 139.3 | 150.6    | 105.1            | 246.1            |
| MFLNH-III | PRE-TERM  | 12                       | 21 | 17.50 | 551.6 | 144.3 | 120.3 | 117.7    | 77.56            | 165.5            |
| MFLNH-III | PRE-TERM  | 14                       | 21 | 17.50 | 386.3 | 120.4 | 91.85 | 96.61    | 64.53            | 126.7            |
| MFLNH-III | PRE-TERM  | 16                       | 19 | 17.50 | 337.9 | 105.8 | 80.24 | 81.30    | 53.19            | 116.4            |
| MFLNH-III | TERM      | 1                        | 28 | 17.50 | 524.0 | 201.4 | 131.6 | 164.1    | 133.1            | 288.9            |
| MFLNH-III | TERM      | 2                        | 26 | 180.0 | 772.4 | 425.3 | 166.9 | 369.6    | 320.9            | 538.7            |
| MFLNH-III | TERM      | 3                        | 28 | 166.7 | 934.4 | 443.2 | 203.0 | 374.6    | 316.9            | 572.9            |

**Table S1 Concentration of Human Milk Oligosaccharides in Term or Preterm Milk At Different Weeks Postpartum**

*\* When there are results below the method limit of quantification (LoQ) the result has been assigned value of  $0.5 \times \text{LoQ}$ , hence the minimum value appears to be the same in many cases. When a large number of datapoints are below LoQ this can also have the effect that the median = minimum.*

| HMO       | Study Arm | Week<br>Post<br>Partum | N  | HMO Concentration (mg/L) |       |       |       |          |                     |                     |
|-----------|-----------|------------------------|----|--------------------------|-------|-------|-------|----------|---------------------|---------------------|
|           |           |                        |    | min *                    | max   | mean  | sd    | median * | Quartile 1<br>(25%) | Quartile 3<br>(75%) |
| MFLNH-III | TERM      | 4                      | 28 | 121.1                    | 976.4 | 432.7 | 219.8 | 380.4    | 310.0               | 487.0               |
| MFLNH-III | TERM      | 5                      | 28 | 81.47                    | 886.4 | 370.5 | 210.7 | 312.8    | 250.3               | 440.1               |
| MFLNH-III | TERM      | 6                      | 27 | 17.50                    | 758.8 | 300.0 | 138.8 | 284.8    | 223.1               | 339.5               |
| MFLNH-III | TERM      | 7                      | 27 | 17.50                    | 600.2 | 249.6 | 144.7 | 206.4    | 149.5               | 302.2               |
| MFLNH-III | TERM      | 8                      | 28 | 17.50                    | 875.6 | 246.8 | 166.4 | 193.6    | 149.2               | 307.4               |
