# Supplementary figures and images for: Human Milk Oligosaccharides in the Milk of Mothers Delivering Term versus Preterm Infants
Source: MDPI journal article supplement (doi:10.3390/nu11061282), 2019-06-05

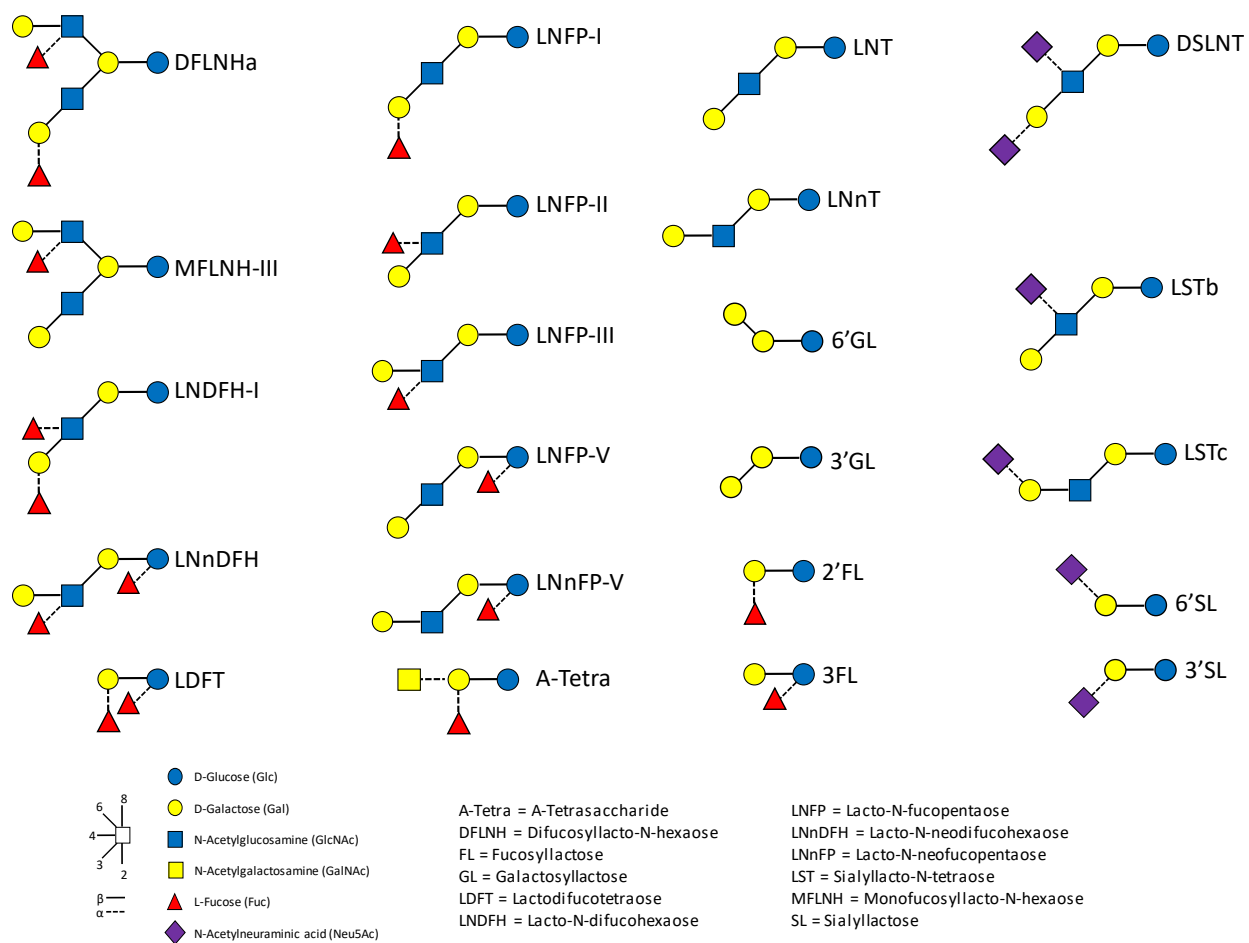

Figure S1: Structures of the Determined HMO Depicted Using Symbol Nomenclature

Supplement: s1 [file s1]
